# Supplementary material for: Synthesis of functionalized 3-isochromanones via metal-free intramolecular alkoxylation-initiated cascade cyclization
Source: Royal Society of Chemistry journal article supplement (doi:10.1039/c9gc01030k), 2019-01-01
Supplement: c9gc01030k1.pdf [file c9gc01030k1.pdf]

Supporting Information

**Synthesis of Functionalized 3-Isochromanones via Metal-Free Intramolecular  
Alkoxylation-Initiated Cascade Cyclization**

Ying-Qi Zhang, Xin-Qi Zhu, Yin Xu, Hao-Zhen Bu, Jia-Le Wang, Tong-Yi Zhai,  
Jin-Mei Zhou, and Long-Wu Ye\*

State Key Laboratory of Physical Chemistry of Solid Surfaces and Key Laboratory for  
Chemical Biology of Fujian Province, College of Chemistry and Chemical  
Engineering, Xiamen University, Xiamen 361005, China

E-mail: [longwuye@xmu.edu.cn](mailto:longwuye@xmu.edu.cn)

| <b>Content</b>                                                   | <b>Page number</b> |
|------------------------------------------------------------------|--------------------|
| <b>General</b>                                                   | 2                  |
| <b>Preparation of Starting Materials</b>                         | 3                  |
| <b>General Procedure for the Preparation of 3-Isochromanones</b> | 13                 |
| <b>Crystal Data</b>                                              | 25                 |
| <b>HPLC Chromatograms</b>                                        | 26                 |
| <b><sup>1</sup>H and <sup>13</sup>C NMR Spectra</b>              | 30                 |

**General Information.** Ethyl acetate (ACS grade), hexanes (ACS grade) and anhydrous 1, 2-dichloroethane (ACS grade) were obtained commercially and used without further purification. Methylene chloride, tetrahydrofuran and diethyl ether were purified according to standard methods unless otherwise noted. Commercially available reagents were used without further purification. Reactions were monitored by thin layer chromatography (TLC) using pre-coated silica gel plates. Flash column chromatography was performed over silica gel (300-400 mesh). Mass spectra were recorded with Micromass QTOF2 Quadrupole/Time-of-Flight Tandem mass spectrometer using electron spray ionization.

$^1\text{H}$  NMR spectra and  $^{13}\text{C}$  NMR spectra were recorded on a Bruker AV-400 spectrometer and a Bruker AV-500 spectrometer in chloroform- $\text{d}_3$ . For  $^1\text{H}$  NMR spectra, chemical shifts are reported in ppm with the internal TMS signal at 0.0 ppm as a standard. For  $^{13}\text{C}$  NMR spectra, chemical shifts are reported in ppm with the internal chloroform signal at 77.0 ppm as a standard.

## Representative synthetic procedures for the preparation of ynamides **1**:<sup>1</sup>

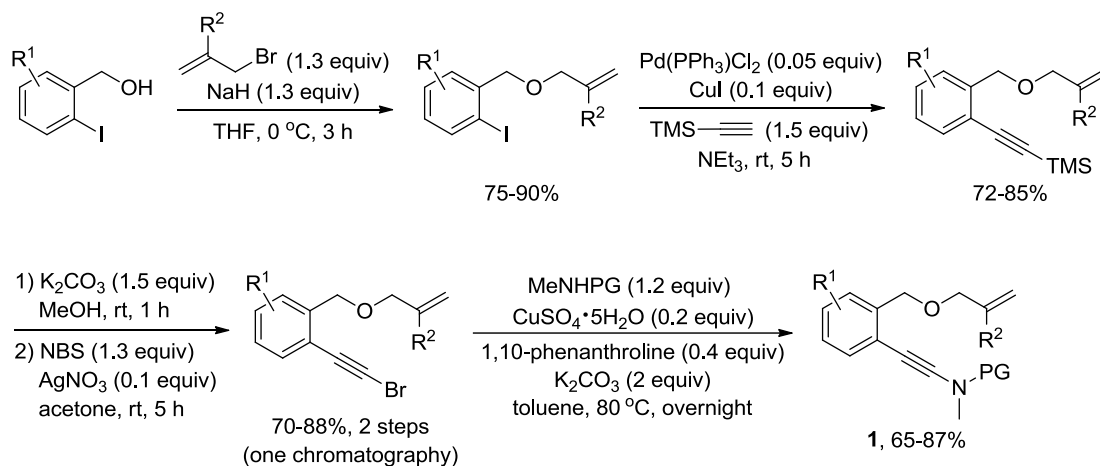

### *N*-((2-((allyloxy)methyl)phenyl)ethynyl)-*N*-methylmethanesulfonamide (**1a**)

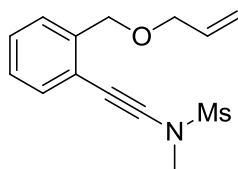

**1a**

Pale yellow oil.  $^1H$  NMR (400 MHz,  $CDCl_3$ )  $\delta$  7.45 (d, 1H,  $J = 7.6$  Hz), 7.41 – 7.36 (m, 1H), 7.32 – 7.26 (m, 1H), 7.25 – 7.19 (m, 1H), 6.02 – 5.91 (m, 1H), 5.35 – 5.27 (m, 1H), 5.24 – 5.17 (m, 1H), 4.63 (s, 2H), 4.09 – 4.06 (m, 2H), 3.29 (s, 3H), 3.11 (s, 3H);  $^{13}C$  NMR (100 MHz,  $CDCl_3$ )  $\delta$  139.5, 134.7, 131.3, 127.9, 127.8, 127.2, 121.1, 116.9, 87.3, 71.3, 70.2, 67.4, 39.0, 36.7; HRESIMS Calcd for  $[C_{14}H_{17}NNaO_3S]^+$  ( $M + Na^+$ ) 302.0821, found 302.0825.

### *N*-((2-((allyloxy)methyl)phenyl)ethynyl)-*N*,4-dimethylbenzenesulfonamide (**1b**)

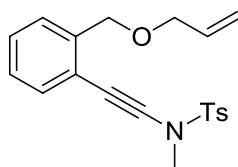

**1b**

Pale yellow oil.  $^1H$  NMR (400 MHz,  $CDCl_3$ )  $\delta$  7.84 (d, 2H,  $J = 8.4$  Hz), 7.48 – 7.44 (m, 1H), 7.38 – 7.25 (m, 4H), 7.23 – 7.18 (m, 1H), 6.02 – 5.91 (m, 1H), 5.35 – 5.28

(m, 1H), 5.22 – 5.16 (m, 1H), 4.62 (s, 2H), 4.09 – 4.06 (m, 2H), 3.17 (s, 3H), 2.45 (s, 3H); <sup>13</sup>C NMR (100 MHz, CDCl<sub>3</sub>) δ 144.7, 139.4, 134.6, 133.1, 131.2, 129.7, 127.6, 127.5, 127.4, 127.0, 121.1, 116.6, 88.1, 71.3, 70.0, 66.7, 39.1, 21.3; HRESIMS Calcd for [C<sub>20</sub>H<sub>21</sub>NNaO<sub>3</sub>S]<sup>+</sup> (M + Na<sup>+</sup>) 378.1134, found 378.1136.

***N*-((2-((allyloxy)methyl)phenyl)ethynyl)-4-bromo-*N*-methylbenzenesulfonamide (1c)**

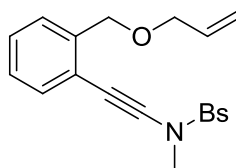

**1c**

Pale yellow oil. <sup>1</sup>H NMR (400 MHz, CDCl<sub>3</sub>) δ 7.81 (d, *J* = 8.0 Hz, 2H), 7.71 – 7.65 (m, 2H), 7.45 (d, *J* = 7.2 Hz, 1H), 7.35 – 7.17 (m, 3H), 6.02 – 5.90 (m, 1H), 5.36 – 5.26 (m, 1H), 5.24 – 5.15 (m, 1H), 4.60 (s, 2H), 4.07 (d, *J* = 4.0 Hz, 2H), 3.16 (s, 3H); <sup>13</sup>C NMR (100 MHz, CDCl<sub>3</sub>) δ 139.3, 134.7, 134.4, 132.2, 131.1, 128.8, 128.6, 127.7, 127.4, 126.9, 120.7, 116.5, 87.3, 71.1, 69.9, 66.9, 39.0; HRESIMS Calcd for [C<sub>19</sub>H<sub>18</sub>BrNNaO<sub>3</sub>S]<sup>+</sup> (M + Na<sup>+</sup>) 442.0083, found 442.0085.

***N*-((2-((allyloxy)methyl)-4-fluorophenyl)ethynyl)-*N*-methylmethanesulfonamide (1d)**

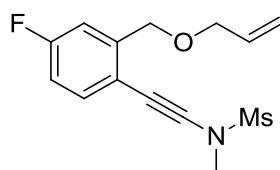

**1d**

Pale yellow oil. <sup>1</sup>H NMR (400 MHz, CDCl<sub>3</sub>) δ 7.37 – 7.31 (m, 1H), 7.23 – 7.18 (m, 1H), 6.95 – 6.88 (m, 1H), 6.02 – 5.91 (m, 1H), 5.33 (d, *J* = 17.2 Hz, 1H), 5.21 (d, *J* = 10.4 Hz, 1H), 4.61 (s, 2H), 4.09 (d, *J* = 4.8 Hz, 2H), 3.28 (s, 3H), 3.11 (s, 3H); <sup>13</sup>C NMR (100 MHz, CDCl<sub>3</sub>) δ 162.2 (d, *J* = 247.4 Hz), 142.8 (d, *J* = 8.0 Hz), 134.3, 133.1 (d, *J* = 8.0 Hz), 117.0, 116.4 (d, *J* = 3.0 Hz), 114.3 (d, *J* = 21.0 Hz), 114.0 (d, *J*

= 20.0 Hz), 87.0, 71.4, 69.4, 66.0, 38.9, 36.5; HRESIMS Calcd for  $[\text{C}_{14}\text{H}_{16}\text{FNNaO}_3\text{S}]^+$  ( $\text{M} + \text{Na}^+$ ) 320.0727, found 320.0726.

***N*-((2-((allyloxy)methyl)-4-bromophenyl)ethynyl)-*N*-methylmethanesulfonamide (1e)**

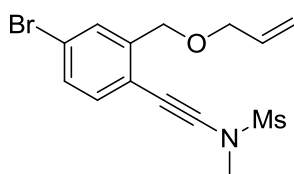

**1e**

Pale yellow oil.  $^1\text{H}$  NMR (400 MHz,  $\text{CDCl}_3$ )  $\delta$  7.65 – 7.60 (m, 1H), 7.38 – 7.33 (m, 1H), 7.22 (d,  $J = 8.4$  Hz, 1H), 6.02 – 5.91 (m, 1H), 5.37 – 5.28 (m, 1H), 5.26 – 5.20 (m, 1H), 4.59 (s, 2H), 4.09 (d,  $J = 5.2$  Hz, 2H), 3.30 (s, 3H), 3.12 (s, 3H);  $^{13}\text{C}$  NMR (100 MHz,  $\text{CDCl}_3$ )  $\delta$  141.7, 134.4, 132.5, 130.6, 130.3, 122.2, 120.0, 117.3, 88.5, 71.7, 69.6, 66.8, 39.0, 37.0; HRESIMS Calcd for  $[\text{C}_{14}\text{H}_{16}\text{BrNNaO}_3\text{S}]^+$  ( $\text{M} + \text{Na}^+$ ) 379.9926, found 379.9925.

***N*-((2-((allyloxy)methyl)-4-(trifluoromethyl)phenyl)ethynyl)-*N*-methylmethanesulfonamide (1f)**

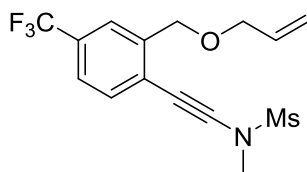

**1f**

Pale yellow oil.  $^1\text{H}$  NMR (400 MHz,  $\text{CDCl}_3$ )  $\delta$  7.75 (s, 1H), 7.51 – 7.44 (m, 2H), 6.05 – 5.94 (m, 1H), 5.39 – 5.32 (m, 1H), 5.27 – 5.22 (m, 1H), 4.66 (s, 2H), 4.15 – 4.10 (m, 2H), 3.34 (s, 3H), 3.15 (s, 3H);  $^{13}\text{C}$  NMR (100 MHz,  $\text{CDCl}_3$ )  $\delta$  140.2, 134.3, 130.9, 129.4 (q,  $J = 32.3$  Hz), 124.8, 124.3 (q,  $J = 3.9$  Hz), 123.9(3) (q,  $J = 3.6$  Hz), 123.9(2) (q,  $J = 270.3$  Hz), 117.4, 89.9, 71.8, 69.7, 67.0, 39.0, 37.2; HRESIMS Calcd for  $[\text{C}_{15}\text{H}_{16}\text{F}_3\text{NNaO}_3\text{S}]^+$  ( $\text{M} + \text{Na}^+$ ) 370.0695, found 370.0705.

***N*-((2-((allyloxy)methyl)-4-methylphenyl)ethynyl)-*N*-methylmethanesulfonamide (1g)**

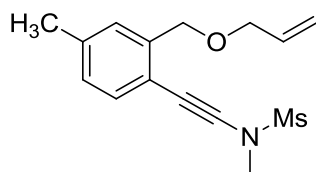

**1g**

Pale yellow oil.  $^1\text{H}$  NMR (400 MHz,  $\text{CDCl}_3$ )  $\delta$  7.29 – 7.25 (m, 2H), 7.03 (d,  $J = 7.2$  Hz, 1H), 6.03 – 5.91 (m, 1H), 5.37 – 5.15 (m, 2H), 4.60 (s, 2H), 4.08 (d,  $J = 5.2$  Hz, 2H), 3.27 (s, 3H), 3.10 (s, 3H), 2.34 (s, 3H);  $^{13}\text{C}$  NMR (100 MHz,  $\text{CDCl}_3$ )  $\delta$  139.4, 138.1, 134.7, 131.4, 128.5, 128.0, 118.0, 116.9, 86.5, 71.4, 70.2, 67.3, 39.0, 36.5, 21.3; HRESIMS Calcd for  $[\text{C}_{15}\text{H}_{19}\text{NNaO}_3\text{S}]^+$  ( $\text{M} + \text{Na}^+$ ) 316.0978, found 316.0975.

***N*-((2-((allyloxy)methyl)-4-methoxyphenyl)ethynyl)-*N*-methylmethanesulfonamide (1h)**

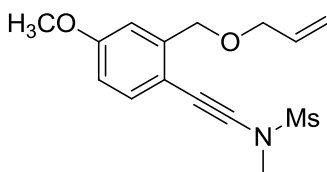

**1h**

Pale yellow oil.  $^1\text{H}$  NMR (400 MHz,  $\text{CDCl}_3$ )  $\delta$  7.34 – 7.25 (m, 1H), 7.02 (s, 1H), 6.78 – 6.73 (m, 1H), 6.02 – 5.90 (m, 1H), 5.33 (d,  $J = 17.2$  Hz, 1H), 5.20 (d,  $J = 10.4$  Hz, 1H), 4.62 (s, 2H), 4.08 (d,  $J = 4.8$  Hz, 2H), 3.80 (s, 3H), 3.27 (s, 3H), 3.10 (s, 3H);  $^{13}\text{C}$  NMR (100 MHz,  $\text{CDCl}_3$ )  $\delta$  159.6, 142.0, 134.6, 133.2, 116.9, 113.0, 112.8, 112.7, 85.8, 71.4, 70.1, 66.8, 55.2, 39.1, 36.4; HRESIMS Calcd for  $[\text{C}_{15}\text{H}_{19}\text{NNaO}_4\text{S}]^+$  ( $\text{M} + \text{Na}^+$ ) 332.0927, found 332.0929.

***N*-((2-((allyloxy)methyl)-4,5-dimethoxyphenyl)ethynyl)-*N*-methylmethanesulfonamide (1i)**

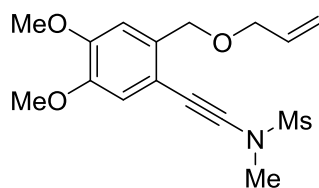

**1i**

Pale yellow oil.  $^1\text{H}$  NMR (400 MHz,  $\text{CDCl}_3$ )  $\delta$  6.97 (s, 1H), 6.88 (s, 1H), 6.02 – 5.91 (m, 1H), 5.34 – 5.29 (m, 1H), 5.22 – 5.18 (m, 1H), 4.59 (s, 2H), 4.08 – 4.04 (m, 2H), 3.90 (s, 3H), 3.86 (s, 3H), 3.29 (s, 3H), 3.12 (s, 3H);  $^{13}\text{C}$  NMR (100 MHz,  $\text{CDCl}_3$ )  $\delta$  149.4, 147.9, 134.8, 133.5, 117.0, 114.3, 113.0, 111.0, 85.6, 71.3, 70.1, 67.3, 56.0, 55.9, 39.1, 36.7; HRESIMS Calcd for  $[\text{C}_{16}\text{H}_{21}\text{NNaO}_5\text{S}]^+$  ( $\text{M} + \text{Na}^+$ ) 362.1033, found 362.1034.

***N*-((2-((allyloxy)methyl)-5-chlorophenyl)ethynyl)-*N*-methylmethanesulfonamide**

**(1j)**

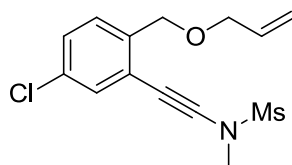

**1j**

Pale yellow oil.  $^1\text{H}$  NMR (400 MHz,  $\text{CDCl}_3$ )  $\delta$  7.36 – 7.30 (m, 2H), 7.23 – 7.19 (m, 1H), 5.98 – 5.86 (m, 1H), 5.33 – 5.25 (m, 1H), 5.20 – 5.15 (m, 1H), 4.54 (s, 2H), 4.03 (d,  $J = 5.6$  Hz, 2H), 3.26 (s, 3H), 3.09 (s, 3H);  $^{13}\text{C}$  NMR (100 MHz,  $\text{CDCl}_3$ )  $\delta$  137.8, 134.4, 132.6, 130.4, 128.9, 127.7, 122.7, 116.9, 88.4, 71.3, 69.5, 66.4, 38.8, 36.8; HRESIMS Calcd for  $[\text{C}_{14}\text{H}_{16}\text{ClNNaO}_3\text{S}]^+$  ( $\text{M} + \text{Na}^+$ ) 336.0432, found 336.0436.

***N*-((2-((allyloxy)methyl)-3-fluorophenyl)ethynyl)-*N*-methylmethanesulfonamide**

**(1k)**

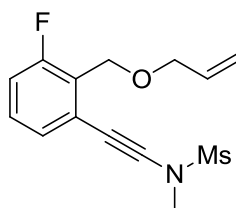

**1k**

Pale yellow oil.  $^1\text{H}$  NMR (400 MHz,  $\text{CDCl}_3$ )  $\delta$  7.26 – 7.15 (m, 2H), 7.02 – 6.95 (m, 1H), 5.99 – 5.88 (m, 1H), 5.33 – 5.27 (m, 1H), 5.19 – 5.15 (m, 1H), 4.66 (d,  $J = 1.6$  Hz, 2H), 4.06 (d,  $J = 5.6$  Hz, 2H), 3.31 (s, 3H), 3.14 (s, 3H);  $^{13}\text{C}$  NMR (100 MHz,  $\text{CDCl}_3$ )  $\delta$  161.5 (d,  $J = 246.0$  Hz), 134.7, 129.5 (d,  $J = 9.0$  Hz), 127.1 (d,  $J = 3.0$  Hz), 125.7 (d,  $J = 16.0$  Hz), 125.6 (d,  $J = 5.0$  Hz), 116.9, 115.1 (d,  $J = 23.0$  Hz), 87.5, 71.3, 67.4, 63.6, 38.9, 37.0; HRESIMS Calcd for  $[\text{C}_{14}\text{H}_{16}\text{FNNaO}_3\text{S}]^+$  ( $\text{M} + \text{Na}^+$ ) 320.0727, found 320.0726.

***N*-((2-((allyloxy)methyl)-6-methylphenyl)ethynyl)-*N*-methylmethanesulfonamide (1l)**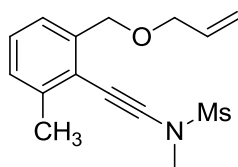**1l**

Pale yellow oil.  $^1\text{H}$  NMR (400 MHz,  $\text{CDCl}_3$ )  $\delta$  7.30 – 7.23 (m, 1H), 7.21 – 7.09 (m, 2H), 6.02 – 5.91 (m, 1H), 5.39 – 5.29 (m, 1H), 5.19 (d,  $J = 10.4$  Hz, 1H), 4.62 (s, 2H), 4.07 (d,  $J = 5.5$  Hz, 2H), 3.30 (s, 3H), 3.11 (s, 3H), 2.40 (s, 3H);  $^{13}\text{C}$  NMR (100 MHz,  $\text{CDCl}_3$ )  $\delta$  139.3, 139.1, 134.7, 128.4, 127.3, 125.1, 121.0, 116.8, 91.6, 71.3, 70.6, 66.4, 39.1, 36.6, 20.7; HRESIMS Calcd for  $[\text{C}_{15}\text{H}_{19}\text{NNaO}_3\text{S}]^+$  ( $\text{M} + \text{Na}^+$ ) 3316.0978, found 316.0977.

***N*-methyl-*N*-((2-(((2-methylallyl)oxy)methyl)phenyl)ethynyl) methanesulfonamide (1m)**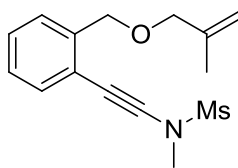**1m**

Pale yellow oil.  $^1\text{H}$  NMR (400 MHz,  $\text{CDCl}_3$ )  $\delta$  7.46 (d,  $J = 7.6$  Hz, 1H), 7.38 (d,  $J =$



7.6 Hz, 1H), 7.32 – 7.19 (m, 2H), 5.02 (s, 1H), 4.91 (s, 1H), 4.61 (s, 2H), 3.98 (s, 2H), 3.29 (s, 3H), 3.11 (s, 3H), 1.76 (s, 3H);  $^{13}\text{C}$  NMR (100 MHz,  $\text{CDCl}_3$ )  $\delta$  142.1, 139.6, 131.2, 127.9, 127.6, 127.1, 121.0, 111.9, 87.3, 74.2, 70.0, 67.3, 39.0, 36.6, 19.4; HRESIMS Calcd for  $[\text{C}_{15}\text{H}_{19}\text{NNaO}_3\text{S}]^+$  ( $\text{M} + \text{Na}^+$ ) 316.0978, found 316.0981.

***N*-methyl-*N*-((2-(((2-phenylallyl)oxy)methyl)phenyl)ethynyl)methanesulfonamide (1n)**

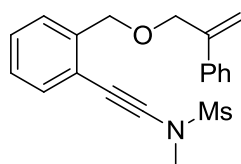

**1n**

Pale yellow oil.  $^1\text{H}$  NMR (400 MHz,  $\text{CDCl}_3$ )  $\delta$  7.52 – 7.43 (m, 2H), 7.42 – 7.36 (m, 2H), 7.35 – 7.20 (m, 5H), 5.54 (s, 1H), 5.39 (s, 1H), 4.70 (s, 2H), 4.45 (s, 2H), 3.25 (s, 3H), 3.05 (s, 3H);  $^{13}\text{C}$  NMR (100 MHz,  $\text{CDCl}_3$ )  $\delta$  144.2, 139.4, 138.8, 131.3, 128.3, 128.1, 128.0, 127.7, 127.4, 126.1, 121.4, 114.4, 87.4, 72.3, 70.4, 67.7, 39.1, 36.8; HRESIMS Calcd for  $[\text{C}_{20}\text{H}_{21}\text{NNaO}_3\text{S}]^+$  ( $\text{M} + \text{Na}^+$ ) 378.1134, found 378.1136.

***N*-((2-((cinnamyloxy)methyl)phenyl)ethynyl)-*N*-methylmethanesulfonamide (1o)**

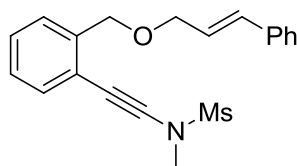

**1o**

Pale yellow oil.  $^1\text{H}$  NMR (400 MHz,  $\text{CDCl}_3$ )  $\delta$  7.52 – 7.34 (m, 4H), 7.33 – 7.17 (m, 5H), 6.68 – 6.58 (m, 1H), 6.38 – 6.27 (m, 1H), 4.68 (s, 2H), 4.26 – 4.22 (m, 2H), 3.22 (s, 3H), 3.01 (s, 3H);  $^{13}\text{C}$  NMR (100 MHz,  $\text{CDCl}_3$ )  $\delta$  139.4, 136.6, 132.4, 131.3, 128.5, 128.0, 127.9, 126.4, 126.0, 121.2, 87.4, 71.0, 70.2, 67.5, 39.0, 36.6; HRESIMS Calcd for  $[\text{C}_{20}\text{H}_{21}\text{NNaO}_3\text{S}]^+$  ( $\text{M} + \text{Na}^+$ ) 378.1134, found 378.1138.

***N*-((2-(2-(allyloxy)ethyl)phenyl)ethynyl)-*N*-methylmethanesulfonamide (1p)**

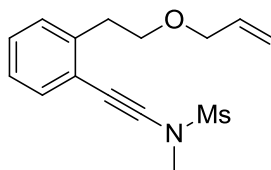

**1p**

Pale yellow oil.  $^1\text{H}$  NMR (400 MHz,  $\text{CDCl}_3$ )  $\delta$  7.41 – 7.35 (m, 1H), 7.25 – 7.20 (m, 2H), 7.19 – 7.14 (m, 1H), 5.96 – 5.84 (m, 1H), 5.28 – 5.21 (m, 1H), 5.18 – 5.13 (m, 1H), 4.01 – 3.98 (m, 2H), 3.68 (t,  $J = 7.3$  Hz, 2H), 3.31 (s, 3H), 3.13 (s, 3H), 3.06 (t,  $J = 7.3$  Hz, 2H);  $^{13}\text{C}$  NMR (100 MHz,  $\text{CDCl}_3$ )  $\delta$  140.4, 134.9, 131.8, 129.5, 128.1, 126.2, 122.2, 116.7, 86.5, 71.8, 70.2, 68.2, 39.2, 36.8, 35.2; HRESIMS Calcd for  $[\text{C}_{15}\text{H}_{19}\text{NNaO}_3\text{S}]^+$  ( $\text{M} + \text{Na}^+$ ) 316.0978, found 316.0980.

**Representative synthetic procedures for the preparation of ynamides **3**:<sup>1</sup>**

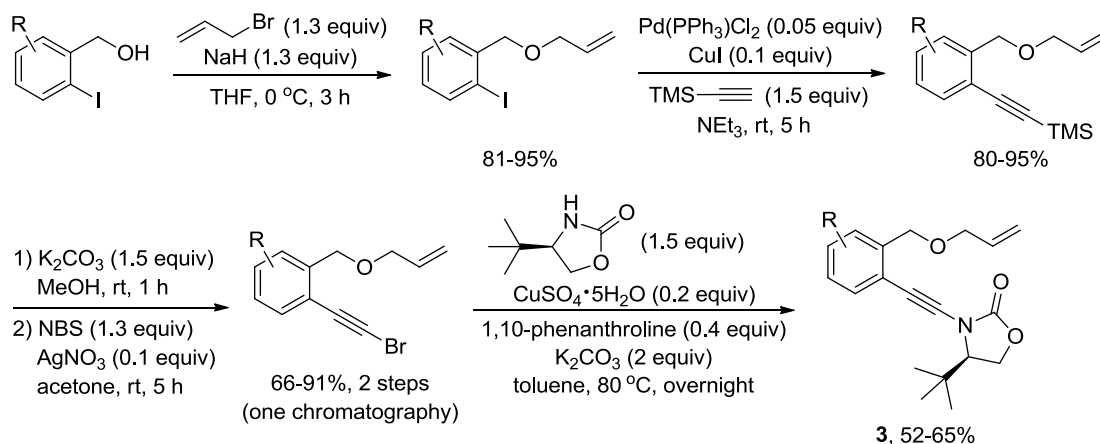

**(*R*)-3-((2-((allyloxy)methyl)phenyl)ethynyl)-4-(*tert*-butyl)oxazolidin-2-one (**3a**)**

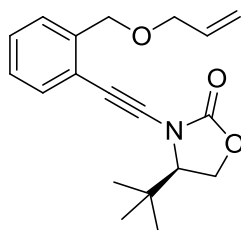

**3a**

Pale yellow oil.  $[\alpha]_{\text{D}}^{20} = -89.8^\circ$  ( $c = 1.0$ ,  $\text{CHCl}_3$ ).  $^1\text{H}$  NMR (400 MHz,  $\text{CDCl}_3$ )  $\delta$  7.50 (d,  $J = 7.4$  Hz, 1H), 7.44 – 7.39 (m, 1H), 7.35 – 7.29 (m, 1H), 7.27 – 7.20 (m, 1H), 6.06 – 5.94 (m, 1H), 5.39 – 5.31 (m, 1H), 5.25 – 5.18 (m, 1H), 4.71 (s, 2H), 4.44 (t,  $J$

= 9.0 Hz, 1H), 4.31 – 4.25 (m, 1H), 4.14 – 4.10 (m, 2H), 3.90 – 3.84 (m, 1H), 1.12 (s, 9H); <sup>13</sup>C NMR (100 MHz, CDCl<sub>3</sub>) δ 156.3, 139.7, 134.7, 131.5, 128.1, 127.4, 127.1, 121.0, 117.0, 84.7, 71.6, 70.2, 69.9, 66.1, 65.5, 34.8, 25.2; HRESIMS Calcd for [C<sub>19</sub>H<sub>23</sub>NNaO<sub>3</sub>]<sup>+</sup> (M + Na<sup>+</sup>) 336.1570, found 336.1579.

**(R)-3-((2-((allyloxy)methyl)-4-fluorophenyl)ethynyl)-4-(tert-butyl)oxazolidin-2-one (3d)**

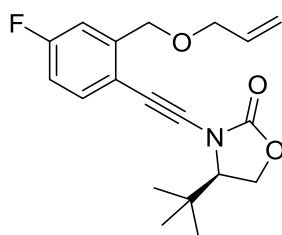

**3d**

Pale yellow oil.  $[\alpha]_D^{20} = -122.2$  (c = 1.0, CHCl<sub>3</sub>). <sup>1</sup>H NMR (400 MHz, CDCl<sub>3</sub>) δ 7.40 – 7.35 (m, 1H), 7.26 – 7.21 (m, 1H), 6.95 – 6.88 (m, 1H), 6.04 – 5.92 (m, 1H), 5.38 – 5.31 (m, 1H), 5.25 – 5.20 (m, 1H), 4.67 (s, 2H), 4.43 (t, *J* = 9.0 Hz, 1H), 4.30 – 4.25 (m, 1H), 4.13 – 4.10 (m, 2H), 3.88 – 3.83 (m, 1H), 1.10 (s, 9H); <sup>13</sup>C NMR (100 MHz, CDCl<sub>3</sub>) δ 162.5 (d, *J* = 248.0 Hz), 156.3, 143.0 (d, *J* = 7.8 Hz), 134.4, 133.3 (d, *J* = 8.4 Hz), 117.2, 116.3 (d, *J* = 3.3 Hz), 114.1 (d, *J* = 23.0 Hz), 84.5, 71.7, 69.6, 68.7, 66.1, 65.5, 34.7, 25.2; HRESIMS Calcd for [C<sub>19</sub>H<sub>22</sub>FNNaO<sub>3</sub>]<sup>+</sup> (M + Na<sup>+</sup>) 354.1476, found 354.1473.

**(R)-3-((2-((allyloxy)methyl)-4-methylphenyl)ethynyl)-4-(tert-butyl)oxazolidin-2-one (3g)**

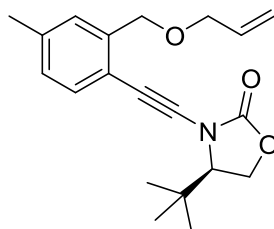

**3g**

Pale yellow oil.  $[\alpha]_D^{20} = -99.4$  (c = 1.0, CHCl<sub>3</sub>). <sup>1</sup>H NMR (400 MHz, CDCl<sub>3</sub>) δ 7.33 – 7.29 (m, 2H), 7.06 – 7.01 (m, 1H), 6.09 – 6.94 (m, 1H), 5.38 – 5.31 (m, 1H), 5.24 –

5.19 (m, 1H), 4.67 (s, 2H), 4.41 (t,  $J = 9.0$  Hz, 1H), 4.28 – 4.22 (m, 1H), 4.13 – 4.09 (m, 2H), 3.87 – 3.81 (m, 1H), 2.35 (s, 3H), 1.10 (s, 9H);  $^{13}\text{C}$  NMR (100 MHz,  $\text{CDCl}_3$ )  $\delta$  156.3, 139.5, 138.2, 134.7, 131.5, 128.1, 127.8, 117.9, 116.9, 83.9, 71.5, 70.1, 69.7, 66.0, 65.4, 34.6, 25.2, 21.3; HRESIMS Calcd for  $[\text{C}_{20}\text{H}_{25}\text{NNaO}_3]^+$  ( $\text{M} + \text{Na}^+$ ) 350.1727, found 350.1736.

**(*R*)-3-((2-((allyloxy)methyl)-4-methoxyphenyl)ethynyl)-4-(*tert*-butyl)oxazolidin-2-one (3h)**

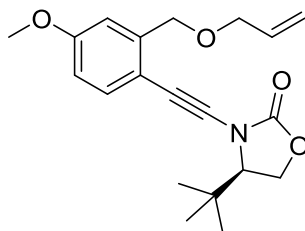

**3h**

Pale yellow oil.  $[\alpha]_{\text{D}}^{20} = -126.4$  ( $c = 1.0$ ,  $\text{CHCl}_3$ ).  $^1\text{H}$  NMR (400 MHz,  $\text{CDCl}_3$ )  $\delta$  7.35 (d,  $J = 8.5$  Hz, 1H), 7.06 (d,  $J = 2.6$  Hz, 1H), 6.79 – 6.74 (m, 1H), 6.04 – 5.93 (m, 1H), 5.38 – 5.31 (m, 1H), 5.24 – 5.18 (m, 1H), 4.68 (s, 2H), 4.41 (t,  $J = 9.0$  Hz, 1H), 4.28 – 4.22 (m, 1H), 4.13 – 4.09 (m, 2H), 3.86 – 3.80 (m, 4H), 1.09 (s, 9H);  $^{13}\text{C}$  NMR (100 MHz,  $\text{CDCl}_3$ )  $\delta$  159.7, 156.4, 142.0, 134.6, 133.3, 116.9, 113.0, 112.6, 112.3, 83.3, 71.5, 70.0, 69.3, 66.1, 65.4, 55.2, 34.7, 25.2; HRESIMS Calcd for  $[\text{C}_{20}\text{H}_{25}\text{NNaO}_4]^+$  ( $\text{M} + \text{Na}^+$ ) 366.1676, found 366.1686.

***N*-((2-(((allyl-1,1- $d_2$ oxy)methyl)phenyl)ethynyl)-*N*-methylmethanesulfonamide (1a')**

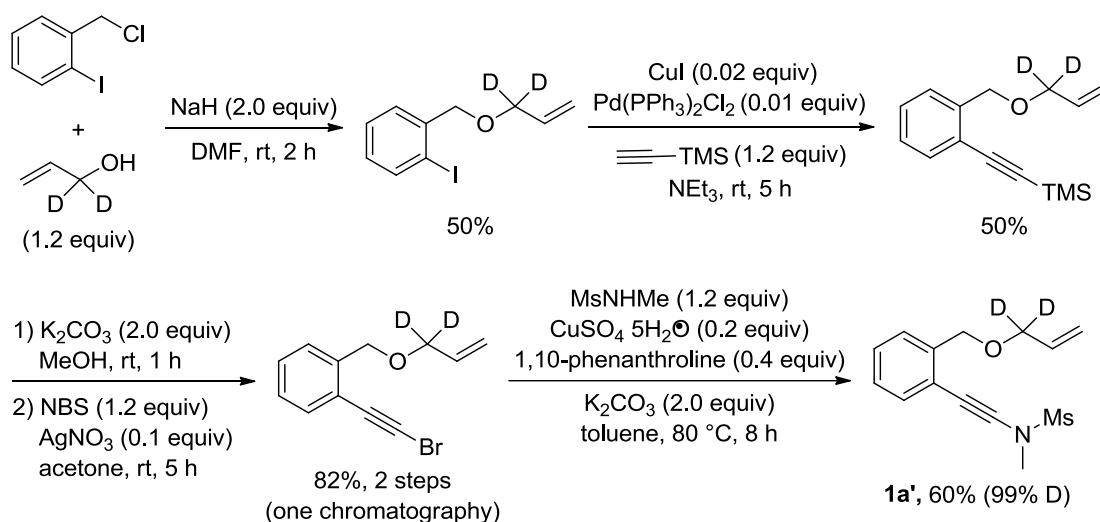

**1a'** was prepared according to the above known procedures.<sup>1</sup> Pale yellow oil. <sup>1</sup>H NMR (400 MHz, CDCl<sub>3</sub>) δ 7.50 – 7.45 (m, 1H), 7.42 – 7.38 (m, 1H), 7.35 – 7.29 (m, 1H), 7.27 – 7.21 (m, 1H), 6.04 – 5.94 (m, 1H), 5.38 – 5.31 (m, 1H), 5.25 – 5.20 (m, 1H), 4.66 (s, 2H), 3.32 (s, 3H), 3.14 (s, 3H); <sup>13</sup>C NMR (100 MHz, CDCl<sub>3</sub>) δ 139.5, 134.6, 131.3, 128.0, 127.8, 127.2, 121.1, 117.1, 87.3, 70.2, 67.5, 39.1, 36.7.

#### General procedure for the synthesis of 3-isochromanones **2a–2n**:

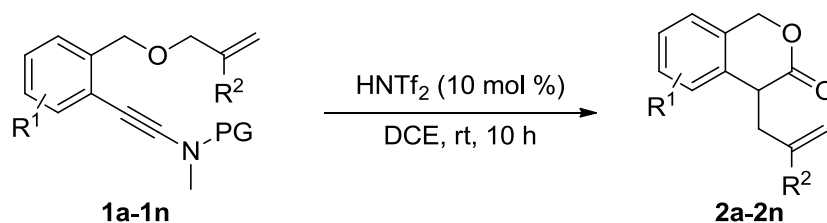

HNTf<sub>2</sub> (8.5 mg, 0.03 mmol) was added to the ynamide **1a–1n** (0.30 mmol) in DCE (6.0 mL) at room temperature. The reaction mixture was stirred at room temperature and the progress of the reaction was monitored by TLC. The reaction typically took 10 h. Upon completion, the mixture was then concentrated and the residue was purified by chromatography on silica gel (eluent: hexanes/ethyl acetate) to afford the desired product **2a–2n**.

#### 4-allylisochroman-3-one (**2a**)

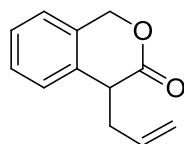

**2a**

Compound **2a** was prepared according to the general procedure. 99% yield (PG = Ms, 55.8 mg), 98% yield (PG = Ts, 55.3 mg, 16 h), 93% yield (PG = Bs, 52.5 mg, 16 h). This compound is known and the spectroscopic data match those reported.<sup>2</sup> <sup>1</sup>H NMR (400 MHz, CDCl<sub>3</sub>) δ 7.38 – 7.20 (m, 4H), 5.93 – 5.81 (m, 1H), 5.41 (d, *J* = 14.0 Hz, 1H), 5.28 (d, 1H, *J* = 14.0 Hz), 5.17 – 5.09 (m, 2H), 3.70 (t, 1H, *J* = 6.8 Hz), 2.87 – 2.66 (m, 2H); <sup>13</sup>C NMR (100 MHz, CDCl<sub>3</sub>) δ 172.2, 134.2, 134.0, 131.4, 128.6, 127.2, 126.6, 124.6, 118.1, 69.5, 45.3, 34.2.

***N*-(4-allyl-1*H*-isochromen-3-yl)-*N*-methylmethanesulfonamide (2aa)**

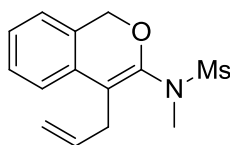

**2aa**

Pale yellow oil. <sup>1</sup>H NMR (400 MHz, CDCl<sub>3</sub>) δ 7.25 – 7.20 (m, 2H), 7.20 – 7.15 (m, 1H), 7.02 (d, *J* = 7.3 Hz, 1H), 5.94 – 5.84 (m, 1H), 5.14 – 5.08 (m, 1H), 5.06 (s, 2H), 5.04 – 5.00 (m, 1H), 3.35 (d, *J* = 5.8 Hz, 2H), 3.12 (s, 3H), 2.98 (s, 3H); <sup>13</sup>C NMR (100 MHz, CDCl<sub>3</sub>) δ 146.0, 136.1, 132.1, 128.8, 128.1, 127.1, 123.7, 122.9, 116.0, 111.3, 69.8, 38.4, 37.1, 30.4; HRESIMS Calcd for [C<sub>14</sub>H<sub>17</sub>NNaO<sub>3</sub>S]<sup>+</sup> (M + Na<sup>+</sup>) 302.0821, found 302.0828.

**2-(2-((allyloxy)methyl)phenyl)-*N*-methyl-*N*-(methylsulfonyl)acetamide (2ab)**

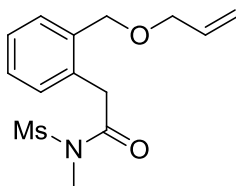

**2ab**

Pale yellow oil. <sup>1</sup>H NMR (400 MHz, CDCl<sub>3</sub>) δ 7.35 – 7.25 (m, 3H), 7.20 (d, *J* = 7.2

Hz, 1H), 5.93 – 5.82 (m, 1H), 5.28 – 5.21 (m, 1H), 5.21 – 5.16 (m, 1H), 4.51 (s, 2H), 4.09 (s, 2H), 3.91 – 3.87 (m, 2H), 3.29 (s, 3H), 3.22 (s, 3H);  $^{13}\text{C}$  NMR (100 MHz,  $\text{CDCl}_3$ )  $\delta$  171.9, 136.0, 134.4, 133.0, 130.9, 130.0, 128.5, 127.4, 117.5, 71.2, 70.7, 41.3, 40.4, 32.6; HRESIMS Calcd for  $[\text{C}_{14}\text{H}_{19}\text{NNaO}_4\text{S}]^+$  ( $\text{M} + \text{Na}^+$ ) 320.0927, found 320.0927.

#### 4-allyl-7-fluoroisochroman-3-one (2d)

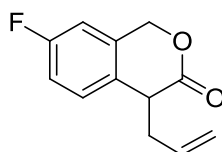

**2d**

Compound **2d** was prepared in 99% yield (61.2 mg) according to the general procedure. Pale yellow oil.  $^1\text{H}$  NMR (400 MHz,  $\text{CDCl}_3$ )  $\delta$  7.24 – 7.19 (m, 1H), 7.08 – 7.01 (m, 1H), 6.97 – 6.93 (m, 1H), 5.90 – 5.78 (m, 1H), 5.38 (d,  $J = 13.6$  Hz, 1H), 5.28 (d,  $J = 13.6$  Hz, 1H), 5.15 – 5.06 (m, 2H), 3.68 (t, 1H,  $J = 6.4$  Hz), 2.87 – 2.62 (m, 2H);  $^{13}\text{C}$  NMR (100 MHz,  $\text{CDCl}_3$ )  $\delta$  171.7, 161.6 (d,  $J = 245.0$  Hz), 133.8, 133.2 (d,  $J = 7.0$  Hz), 129.6 (d,  $J = 3.0$  Hz), 128.4 (d,  $J = 8.0$  Hz), 118.3, 115.4 (d,  $J = 22.0$  Hz), 111.8 (d,  $J = 23.0$  Hz), 68.9, 44.6, 34.3; HRESIMS Calcd for  $[\text{C}_{12}\text{H}_{11}\text{FNaO}_2]^+$  ( $\text{M} + \text{Na}^+$ ) 229.0635, found 229.0638.

#### 4-allyl-7-bromoisochroman-3-one (2e)

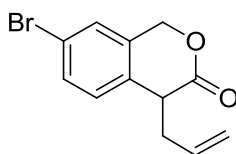

**2e**

Compound **2e** was prepared in 98% yield (78.5 mg) according to the general procedure. Pale yellow oil.  $^1\text{H}$  NMR (400 MHz,  $\text{CDCl}_3$ )  $\delta$  7.49 – 7.30 (m, 2H), 7.19 – 7.05 (m, 1H), 5.90 – 5.75 (m, 1H), 5.36 (d,  $J = 14.0$  Hz, 1H), 5.23 (d,  $J = 14.0$  Hz, 1H), 5.21 – 5.08 (m, 2H), 3.65 (t,  $J = 5.2$  Hz, 1H), 2.85 – 2.62 (m, 2H);  $^{13}\text{C}$  NMR (100 MHz,  $\text{CDCl}_3$ )  $\delta$  171.3, 133.7, 133.3, 132.9, 131.5, 128.3, 127.7, 121.0, 118.4, 68.6,

44.7, 34.0; HRESIMS Calcd for  $[\text{C}_{12}\text{H}_{11}\text{BrNaO}_2]^+$  ( $\text{M} + \text{Na}^+$ ) 288.9835, found 288.9836.

#### 4-allyl-7-(trifluoromethyl)isochroman-3-one (2f)

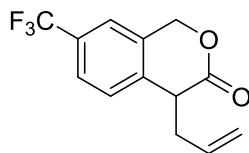

**2f**

Compound **2f** was prepared in 98% yield (75.3 mg) according to the general procedure except for 2 equiv of  $\text{H}_2\text{O}$  as an additive. Pale yellow oil.  $^1\text{H}$  NMR (400 MHz,  $\text{CDCl}_3$ )  $\delta$  7.65 (d,  $J = 7.9$  Hz, 1H), 7.52 (s, 1H), 7.41 (d,  $J = 8.0$  Hz, 1H), 5.93 – 5.80 (m, 1H), 5.48 (d,  $J = 14.4$  Hz, 1H), 5.36 (d,  $J = 14.4$  Hz, 1H), 5.20 – 5.11 (m, 2H), 3.78 (t,  $J = 6.7$  Hz, 1H), 2.93 – 2.84 (m, 1H), 2.79 – 2.70 (m, 1H);  $^{13}\text{C}$  NMR (100 MHz,  $\text{CDCl}_3$ )  $\delta$  171.1, 138.1, 133.5, 132.2, 129.9 (q,  $J = 32.3$  Hz), 127.4, 125.6 (q,  $J = 3.7$  Hz), 123.7 (q,  $J = 270.7$  Hz), 121.8 (q,  $J = 3.7$  Hz), 118.7, 68.9, 45.2, 34.1. HRESIMS Calcd for  $[\text{C}_{13}\text{H}_{11}\text{F}_3\text{NaO}_2]^+$  ( $\text{M} + \text{Na}^+$ ) 279.0603, found 279.0609.

#### 4-allyl-7-methylisochroman-3-one (2g)

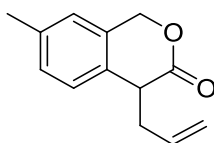

**2g**

Compound **2g** was prepared in 99% (56.0 mg) yield according to the general procedure. Pale yellow oil.  $^1\text{H}$  NMR (400 MHz,  $\text{CDCl}_3$ )  $\delta$  7.16 – 7.10 (m, 2H), 7.02 (s, 1H), 5.92 – 5.80 (m, 1H), 5.36 (d,  $J = 14.0$  Hz, 1H), 5.23 (d,  $J = 14.0$  Hz, 1H), 5.15 – 5.08 (m, 2H), 3.65 (t,  $J = 6.8$  Hz, 1H), 2.84 – 2.61 (m, 2H), 2.35 (s, 3H);  $^{13}\text{C}$  NMR (100 MHz,  $\text{CDCl}_3$ )  $\delta$  172.4, 137.0, 134.3, 131.2, 130.8, 129.2, 126.4, 125.2, 117.9, 69.5, 44.9, 34.2, 20.9; HRESIMS Calcd for  $[\text{C}_{13}\text{H}_{14}\text{NaO}_2]^+$  ( $\text{M} + \text{Na}^+$ ) 225.0886, found 225.0885.



#### 4-allyl-7-methoxyisochroman-3-one (2h)

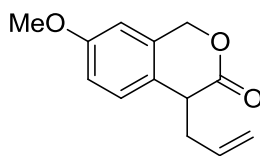

**2h**

Compound **2h** was prepared in 99% yield (64.7 mg) according to the general procedure. Pale yellow oil.  $^1\text{H}$  NMR (400 MHz,  $\text{CDCl}_3$ )  $\delta$  7.14 (d,  $J = 8.4$  Hz, 1H), 6.89 – 6.85 (m, 1H), 6.78 – 6.73 (m, 1H), 5.91 – 5.79 (m, 1H), 5.35 (d,  $J = 14.0$  Hz, 1H), 5.22 (d,  $J = 14.0$  Hz, 1H), 5.15 – 5.07 (m, 2H), 3.80 (s, 3H), 3.64 (t,  $J = 6.4$  Hz, 1H), 2.83 – 2.61 (m, 2H);  $^{13}\text{C}$  NMR (100 MHz,  $\text{CDCl}_3$ )  $\delta$  172.3, 158.7, 134.2, 132.4, 127.7, 125.6, 117.9, 113.9, 110.1, 69.4, 55.3, 44.5, 34.3; HRESIMS Calcd for  $[\text{C}_{13}\text{H}_{14}\text{NaO}_3]^+$  ( $\text{M} + \text{Na}^+$ ) 241.0835, found 241.0833.

#### 4-allyl-6,7-dimethoxyisochroman-3-one (2i)

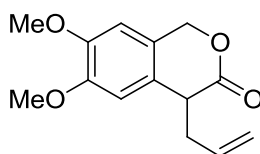

**2i**

Compound **2i** was prepared in 68% yield (50.6 mg) according to the general procedure except for changing the solvent to  $\text{Et}_2\text{O}$  and reacting for 16 h. Pale yellow oil.  $^1\text{H}$  NMR (400 MHz,  $\text{CDCl}_3$ )  $\delta$  6.71 (s, 1H), 6.69 (s, 1H), 5.91 – 5.75 (m, 1H), 5.36 (d,  $J = 14.0$  Hz, 1H), 5.19 (d,  $J = 14.0$  Hz, 1H), 5.16 – 5.04 (m, 2H), 3.87 (s, 6H), 3.62 (t,  $J = 6.8$  Hz, 1H), 2.84 – 2.72 (m, 1H), 2.71 – 2.57 (m, 1H);  $^{13}\text{C}$  NMR (100 MHz,  $\text{CDCl}_3$ )  $\delta$  172.2, 149.1, 148.2, 134.2, 126.0, 123.2, 118.1, 109.9, 107.7, 69.4, 56.0, 44.8, 34.9; HRESIMS Calcd for  $[\text{C}_{14}\text{H}_{16}\text{NaO}_4]^+$  ( $\text{M} + \text{Na}^+$ ) 271.0941, found 271.0945.

#### 4-allyl-6-chloroisochroman-3-one (2j)

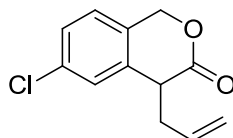

## 2j

Compound **2j** was prepared in 98% yield (65.6 mg) according to the general procedure. Pale yellow oil.  $^1\text{H}$  NMR (400 MHz,  $\text{CDCl}_3$ )  $\delta$  7.29 – 7.23 (m, 2H), 7.16 (d,  $J = 8.0$  Hz, 1H), 5.91 – 5.79 (m, 1H), 5.36 (d,  $J = 14.0$  Hz, 1H), 5.25 (d,  $J = 14.0$  Hz, 1H), 5.18 – 5.08 (m, 2H), 3.66 (t,  $J = 6.8$  Hz, 1H), 2.86 – 2.64 (m, 2H);  $^{13}\text{C}$  NMR (100 MHz,  $\text{CDCl}_3$ )  $\delta$  171.3, 135.9, 134.4, 133.6, 129.8, 127.4, 126.7, 126.0, 118.4, 68.8, 44.9, 33.9; HRESIMS Calcd for  $[\text{C}_{12}\text{H}_{11}\text{ClNaO}_2]^+$  ( $\text{M} + \text{Na}^+$ ) 245.0340, found 245.0341.

## 4-allyl-8-fluoroisochroman-3-one (2k)

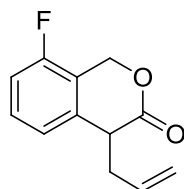

**2k**

Compound **2k** was prepared in 99% yield (61.2 mg) according to the general procedure. Pale yellow oil.  $^1\text{H}$  NMR (400 MHz,  $\text{CDCl}_3$ )  $\delta$  7.36 – 7.30 (m, 1H), 7.06 – 6.97 (m, 2H), 5.89 – 5.76 (m, 1H), 5.48 – 5.36 (m, 2H), 5.15 – 5.08 (m, 2H), 3.73 (t,  $J = 6.8$  Hz, 1H), 2.85 – 2.64 (m, 2H);  $^{13}\text{C}$  NMR (100 MHz,  $\text{CDCl}_3$ )  $\delta$  171.4, 157.9 (d,  $J = 247.0$  Hz), 136.6 (d,  $J = 3.0$  Hz), 133.6, 130.0 (d,  $J = 8.0$  Hz), 122.3 (d,  $J = 4.0$  Hz), 118.5 (d,  $J = 18.0$  Hz), 118.4, 113.9 (d,  $J = 20.0$  Hz), 63.4, 44.9, 34.7; HRESIMS Calcd for  $[\text{C}_{12}\text{H}_{11}\text{FNaO}_2]^+$  ( $\text{M} + \text{Na}^+$ ) 229.0635, found 229.0636.

## 4-allyl-5-methylisochroman-3-one (2l)

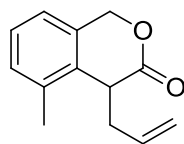

**2l**

Compound **2l** was prepared in 99% yield (60.0 mg) according to the general procedure. Pale yellow oil.  $^1\text{H}$  NMR (400 MHz,  $\text{CDCl}_3$ )  $\delta$  7.21 – 7.16 (m, 2H), 7.06 –

7.00 (m, 1H), 5.88 – 5.76 (m, 1H), 5.56 (d,  $J = 14.4$  Hz, 1H), 5.17 (d,  $J = 14.0$  Hz, 1H), 5.12 – 5.06 (m, 2H), 3.97 (t,  $J = 7.5$  Hz, 1H), 2.64 – 2.47 (m, 2H), 2.31 (s, 3H);  $^{13}\text{C}$  NMR (100 MHz,  $\text{CDCl}_3$ )  $\delta$  172.2, 135.2, 133.5, 132.5, 130.5, 130.4, 127.1, 122.4, 118.4, 69.8, 43.8, 35.5, 18.2; HRESIMS Calcd for  $[\text{C}_{13}\text{H}_{14}\text{NaO}_2]^+$  ( $\text{M} + \text{Na}^+$ ) 225.0886, found 225.0888.

#### 4-(2-methylallyl)isochroman-3-one (**2m**)

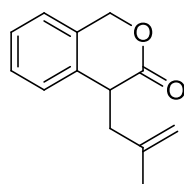

**2m**

Compound **2m** was prepared in 72% yield (43.6 mg) according to the general procedure except for the reaction time of 16 h. Pale yellow oil.  $^1\text{H}$  NMR (400 MHz,  $\text{CDCl}_3$ )  $\delta$  7.35 – 7.27 (m, 2H), 7.23 – 7.18 (m, 2H), 5.43 (d,  $J = 14.0$  Hz, 1H), 5.29 (d,  $J = 14.0$  Hz, 1H), 4.85 (s, 1H), 4.64 (s, 1H), 3.84 – 3.79 (m, 1H), 2.82 – 2.76 (m, 1H), 2.58 – 2.51 (m, 1H), 1.82 (s, 3H);  $^{13}\text{C}$  NMR (100 MHz,  $\text{CDCl}_3$ )  $\delta$  172.3, 141.3, 134.3, 131.2, 128.5, 127.2, 126.7, 124.5, 113.3, 69.4, 44.1, 38.0, 22.4; HRESIMS Calcd for  $[\text{C}_{13}\text{H}_{14}\text{NaO}_2]^+$  ( $\text{M} + \text{Na}^+$ ) 225.0886, found 225.0888.

#### 4-(2-phenylallyl)isochroman-3-one (**2n**)

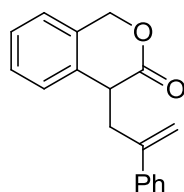

**2n**

Compound **2n** was prepared in 81% yield (64.2 mg) according to the general procedure. Pale yellow oil.  $^1\text{H}$  NMR (500 MHz,  $\text{CDCl}_3$ )  $\delta$  7.48 – 7.42 (m, 2H), 7.39 – 7.34 (m, 2H), 7.33 – 7.24 (m, 3H), 7.21 – 7.19 (m, 1H), 7.10 – 7.05 (m, 1H), 5.42 (d,  $J = 14.0$  Hz, 1H), 5.36 (s, 1H), 5.25 (d,  $J = 14.0$  Hz, 1H), 4.98 (s, 1H), 3.79 – 3.73 (m, 1H), 3.44 – 3.37 (m, 1H), 3.00 – 2.92 (m, 1H);  $^{13}\text{C}$  NMR (125 MHz,  $\text{CDCl}_3$ )  $\delta$  172.4,

144.3, 139.7, 134.1, 131.2, 128.6, 128.4, 127.9, 127.2, 127.0, 126.3, 124.6, 115.7, 69.5, 44.2, 35.9; HRESIMS Calcd for  $[C_{18}H_{16}NaO_2]^+$  ( $M + Na^+$ ) 287.1043, found 287.1047.

#### 4-cinnamylisochroman-3-one (**2o**)

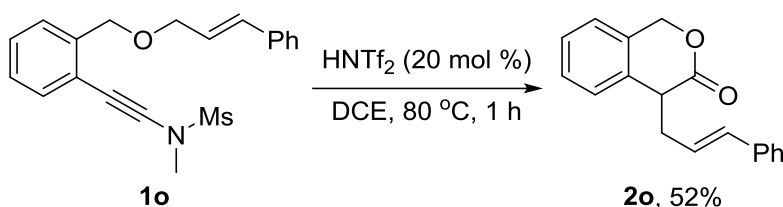

HNTf<sub>2</sub> (16.9 mg, 0.06 mmol) was added to the ynamide **1o** (0.30 mmol) in DCE (6.0 mL) at room temperature. The reaction mixture was stirred at 80 °C and the progress of the reaction was monitored by TLC. The reaction took 1 h. Upon completion, the mixture was then concentrated and the residue was purified by chromatography on silica gel (eluent: hexanes/ethyl acetate) to afford the desired product **2o** (41.2 mg, 52% yield, pale yellow oil). <sup>1</sup>H NMR (400 MHz, CDCl<sub>3</sub>) δ 7.38 – 7.17 (m, 9H), 6.46 (d, *J* = 15.6 Hz, 1H), 6.28 – 6.18 (m, 1H), 5.41 (d, *J* = 14.0 Hz, 1H), 5.29 (d, *J* = 14.0 Hz, 1H), 3.78 (t, *J* = 6.6 Hz, 1H), 3.08 – 2.76 (m, 2H); <sup>13</sup>C NMR (100 MHz, CDCl<sub>3</sub>) δ 172.3, 137.0, 133.9, 133.2, 131.4, 128.7, 128.5, 127.4, 127.3, 126.7, 126.2, 125.5, 124.7, 69.6, 45.7, 33.7; HRESIMS Calcd for  $[C_{18}H_{16}NaO_2]^+$  ( $M + Na^+$ ) 287.1043, found 287.1042.

#### 1-allyl-4,5-dihydrobenzo[*d*]oxepin-2(1*H*)-one (**2p**)

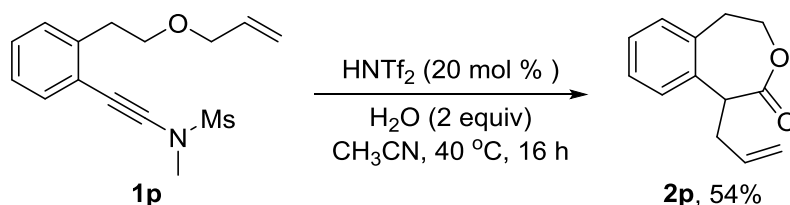

HNTf<sub>2</sub> (16.9 mg, 0.06 mmol) and H<sub>2</sub>O (10.8 mg, 0.6 mmol) were added to the ynamide **1p** (0.30 mmol) in CH<sub>3</sub>CN (6.0 mL) at room temperature. The reaction mixture was stirred at 40 °C and the progress of the reaction was monitored by TLC. The reaction took 16 h. Upon completion, the mixture was then concentrated and the

residue was purified by chromatography on silica gel (eluent: hexanes/ethyl acetate) to afford the desired product **2p** (32.7 mg, 54% yield, pale yellow oil).  $^1\text{H}$  NMR (400 MHz,  $\text{CDCl}_3$ )  $\delta$  7.26 – 7.19 (m, 3H), 7.15 – 7.11 (m, 1H), 5.99 – 5.87 (m, 1H), 5.23 – 5.16 (m, 1H), 5.15 – 5.10 (m, 1H), 4.86 – 4.78 (m, 1H), 4.57 – 4.49 (m, 1H), 4.43 – 4.37 (m, 1H), 3.42 – 3.30 (m, 2H), 3.01 – 2.91 (m, 1H), 2.80 – 2.71 (m, 1H);  $^{13}\text{C}$  NMR (100 MHz,  $\text{CDCl}_3$ )  $\delta$  173.1, 135.3, 135.0, 132.9, 130.5, 127.5, 127.0, 126.9, 117.6, 65.1, 46.0, 34.0, 33.9; HRESIMS Calcd for  $[\text{C}_{13}\text{H}_{14}\text{NaO}_2]^+$  ( $\text{M} + \text{Na}^+$ ) 225.0886, found 225.0888.

### General procedure for the synthesis of 3-isochromanones **2-ent**:

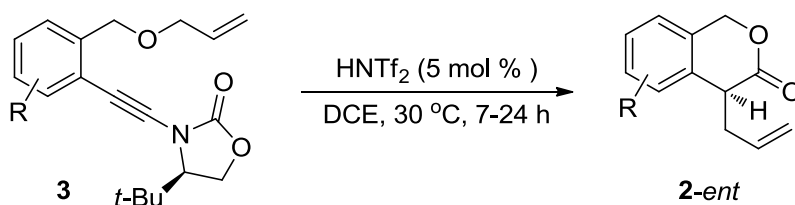

HNTf<sub>2</sub> (4.2 mg, 0.015 mmol) was added to the ynamide **3** (0.30 mmol) in DCE (6.0 mL) at 30 °C. The reaction mixture was stirred at 30 °C and the progress of the reaction was monitored by TLC. The reaction took 7 - 24 h. Upon completion, the mixture was then concentrated and the residue was purified by chromatography on silica gel (eluent: hexanes/ethyl acetate) to afford the desired product **2-ent**.

### (*S*)-4-allylisochroman-3-one (**2a-ent**)

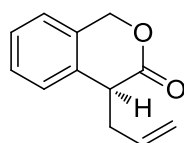

**2a-ent**

Compound **2a-ent** was prepared in 72% yield (40.6 mg) according to the general procedure (eq 3, entry 1).  $[\alpha]_{\text{D}}^{20} = -170.8^\circ$  ( $c = 1.0$ ,  $\text{CHCl}_3$ ). 94% ee (determined by HPLC: Chiralcel AD-H Column, 5/95 *i*-PrOH/hexane, 1.0 mL/min, 256 nm; TR = 13.48 min (minor), 16.32 min (major)).

### (*S*)-4-allyl-7-fluoroisochroman-3-one (**2d-ent**)

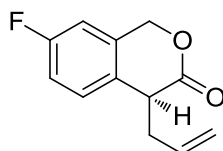

**2d-ent**

Compound **2d-ent** was prepared in 62% yield (38.3 mg) according to the general procedure except for adding 2 equiv of H<sub>2</sub>O as an additive (eq 3, entry 2).  $[\alpha]_D^{20} = -197.7^\circ$  ( $c = 1.0$ , CHCl<sub>3</sub>). 90% ee (determined by HPLC: Chiralcel AD-H Column, 5/95 *i*-PrOH/hexane, 1.0 mL/min, 256 nm; TR = 13.35 min (minor), 14.99 min (major)).

**(S)-4-allyl-7-methylisochroman-3-one (2g-ent)**

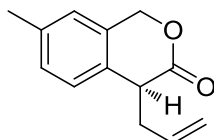

**2g-ent**

Compound **2g-ent** was prepared in 85% yield (51.5 mg) according to the general procedure (eq 3, entry 3).  $[\alpha]_D^{20} = -18.1^\circ$  ( $c = 1.0$ , CHCl<sub>3</sub>). 95% ee (determined by HPLC: Chiralcel AD-H Column, 5/95 *i*-PrOH/hexane, 1.0 mL/min, 256 nm; TR = 12.27 min (minor), 16.07 min (major)).

**(S)-4-allyl-7-methoxyisochroman-3-one (2h-ent)**

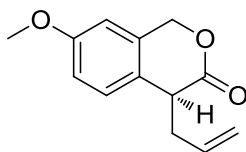

**2h-ent**

Compound **2h-ent** was prepared in 66% yield (43.2 mg) according to the general procedure (eq 3, entry 4).  $[\alpha]_D^{20} = -175.6^\circ$  ( $c = 1.0$ , CHCl<sub>3</sub>). 93% ee (determined by HPLC: Chiralcel AD-H Column, 5/95 *i*-PrOH/hexane, 1.0 mL/min, 256 nm; TR = 20.02 min (minor), 25.91 min (major)).

**4,4-diallyl-6,7-dimethoxyisochroman-3-one (2ia)**

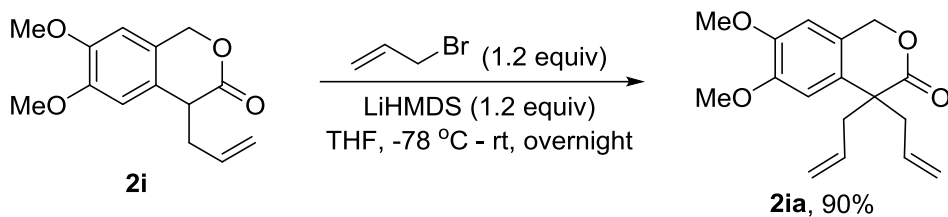

Compound **2ia** was prepared in 90% yield according to the above procedure. Pale yellow oil.  $^1\text{H}$  NMR (400 MHz,  $\text{CDCl}_3$ )  $\delta$  6.73 (s, 1H), 6.55 (s, 1H), 5.55 – 5.43 (m, 2H), 5.28 (s, 2H), 5.07 – 4.96 (m, 4H), 3.87 (s, 3H), 3.85 (s, 3H), 2.90 – 2.82 (m, 2H), 2.61 – 2.53 (m, 2H);  $^{13}\text{C}$  NMR (100 MHz,  $\text{CDCl}_3$ )  $\delta$  173.1, 149.0, 148.1, 132.6, 126.6, 123.0, 119.2, 109.3, 106.5, 69.1, 56.1, 55.9, 49.8, 43.4; HRESIMS Calcd for  $[\text{C}_{17}\text{H}_{20}\text{NaO}_4]^+$  ( $\text{M} + \text{Na}^+$ ) 311.1254, found 311.1258.

#### 6',7'-dimethoxyspiro[cyclopent[3]ene-1,4'-isochroman]-3'-one (**2ib**)

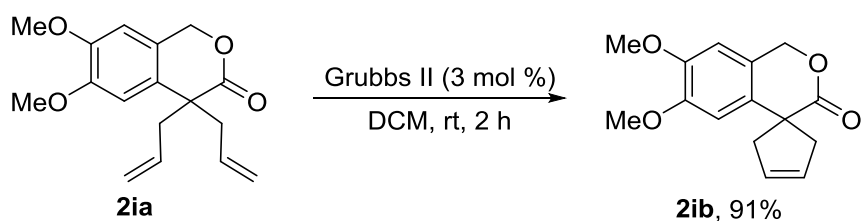

Compound **2ib** was prepared in 91% yield according to the above procedure. Pale yellow oil.  $^1\text{H}$  NMR (400 MHz,  $\text{CDCl}_3$ )  $\delta$  6.69 (s, 1H), 6.67 (s, 1H), 5.72 (s, 2H), 5.28 (s, 2H), 3.86 (s, 3H), 3.85 (s, 3H), 3.35 (d,  $J = 15.3$  Hz, 2H), 2.69 (d,  $J = 15.0$  Hz, 2H);  $^{13}\text{C}$  NMR (100 MHz,  $\text{CDCl}_3$ )  $\delta$  175.3, 149.2, 148.0, 132.1, 127.6, 122.5, 108.1, 107.8, 68.9, 56.0, 50.7, 43.7; HRESIMS Calcd for  $[\text{C}_{15}\text{H}_{16}\text{NaO}_4]^+$  ( $\text{M} + \text{Na}^+$ ) 283.0941, found 283.0945.

#### 6',7'-dimethoxyspiro[cyclopentane-1,4'-isochroman]-3'-one (**2ic**)

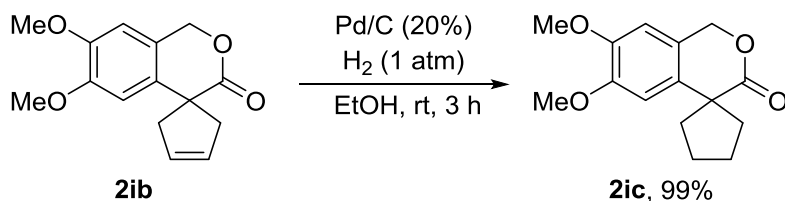

Compound **2ic** was prepared in 99% yield according to the above procedure. This compound is known and the spectroscopic data match those reported.<sup>3</sup>  $^1\text{H}$  NMR (400

MHz, CDCl<sub>3</sub>)  $\delta$  6.77 (s, 1H), 6.67 (s, 1H), 5.26 (s, 2H), 3.88 (s, 3H), 3.86 (s, 3H), 2.50 – 2.40 (m, 2H), 1.99 – 1.87 (m, 4H), 1.86 – 1.76 (m, 2H); <sup>13</sup>C NMR (100 MHz, CDCl<sub>3</sub>)  $\delta$  175.6, 149.0, 147.8, 131.7, 123.5, 108.1, 107.9, 68.9, 56.1, 56.0, 52.4, 35.7, 25.5.

#### 4-(allyl-3,3-d<sub>2</sub>)isochroman-3-one (2a')

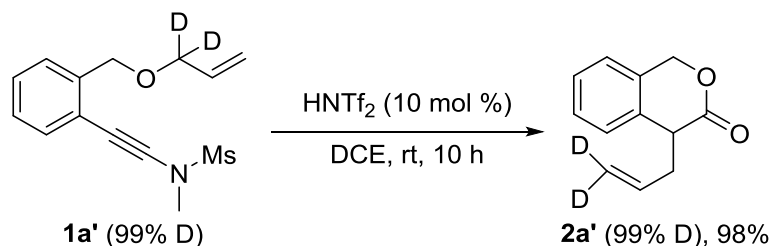

Compound **2a'** was prepared in 98% yield (55.9 mg) according to the above procedure. Pale yellow oil. <sup>1</sup>H NMR (400 MHz, CDCl<sub>3</sub>)  $\delta$  7.41 – 7.30 (m, 2H), 7.29 – 7.22 (m, 2H), 5.94 – 5.84 (m, 1H), 5.44 (d, *J* = 14.1 Hz, 1H), 5.30 (d, *J* = 14.1 Hz, 1H), 3.72 (t, *J* = 6.8 Hz, 1H), 2.90 – 2.80 (m, 1H), 2.77 – 2.67 (m, 1H); <sup>13</sup>C NMR (100 MHz, CDCl<sub>3</sub>)  $\delta$  172.2, 133.9(8), 133.9(6), 131.3, 128.6, 127.2, 126.6, 124.6, 69.5, 45.4, 34.1.

#### Reference:

1. L. Li, X.-Q. Zhu, Y.-Q. Zhang, H.-Z. Bu, P. Yuan, J. Chen, J. Su, X. Deng, L.-W. Ye, *Chem. Sci.* **2019**, *10*, 3213.
2. B. Peng, D. H. O'Donovan, I. D. Jurberg, N. Maulide, *Chem. Eur. J.* **2012**, *18*, 16292.
3. D. S. Goldfarb, U.S. Pat. Appl. Publ. 0163545A1, **2009**.



**(S)-4-allylisochroman-3-one (2a-ent). CCDC Number = 1906229.**

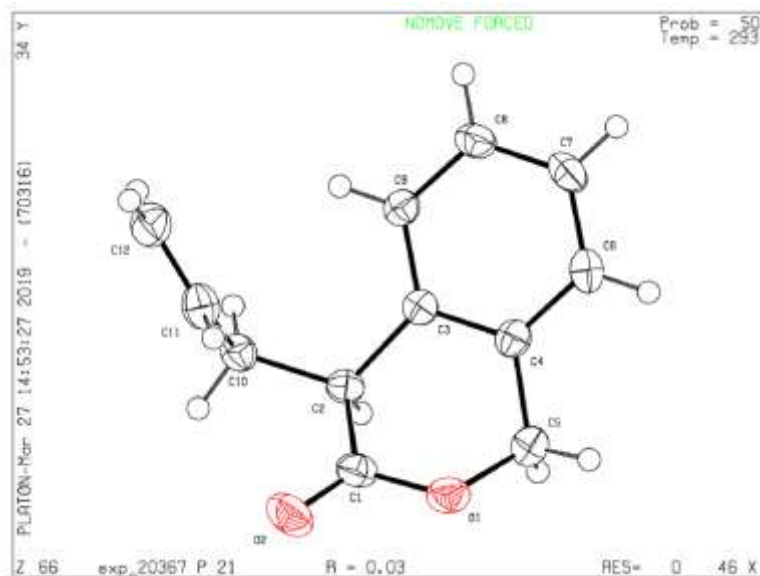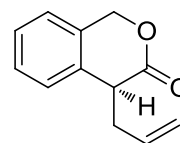

Bond precision: C-C = 0.0032 Å

Wavelength=1.54184

Cell: a=6.7747(3)

b=6.9936(2)

c=10.2745(4)

alpha=90

beta=99.508(4)

gamma=90

Temperature: 293 K

|                        | Calculated  | Reported    |
|------------------------|-------------|-------------|
| Volume                 | 480.11(3)   | 480.11(3)   |
| Space group            | P 21        | P 21        |
| Hall group             | P 2yb       | P 2yb       |
| Moiety formula         | C12 H12 O2  | ?           |
| Sum formula            | C12 H12 O2  | C12 H12 O2  |
| Mr                     | 188.22      | 188.22      |
| Dx, g cm <sup>-3</sup> | 1.302       | 1.302       |
| Z                      | 2           | 2           |
| Mu (mm <sup>-1</sup> ) | 0.706       | 0.706       |
| F000                   | 200.0       | 200.0       |
| F000'                  | 200.61      |             |
| h,k,lmax               | 8,8,12      | 7,7,11      |
| Nref                   | 1740 [ 948] | 1453        |
| Tmin,Tmax              | 0.959,0.965 | 0.720,1.000 |
| Tmin'                  | 0.932       |             |

Correction method= # Reported T Limits: Tmin=0.720 Tmax=1.000

AbsCorr = MULTI-SCAN

Data completeness= 1.53/0.84

Theta(max)= 67.684

R(reflections)= 0.0308( 1429)

wR2(reflections)= 0.0782( 1453)

S = 1.079

Npar= 127

Compound **2a-ent**

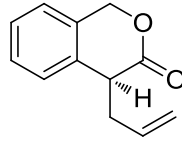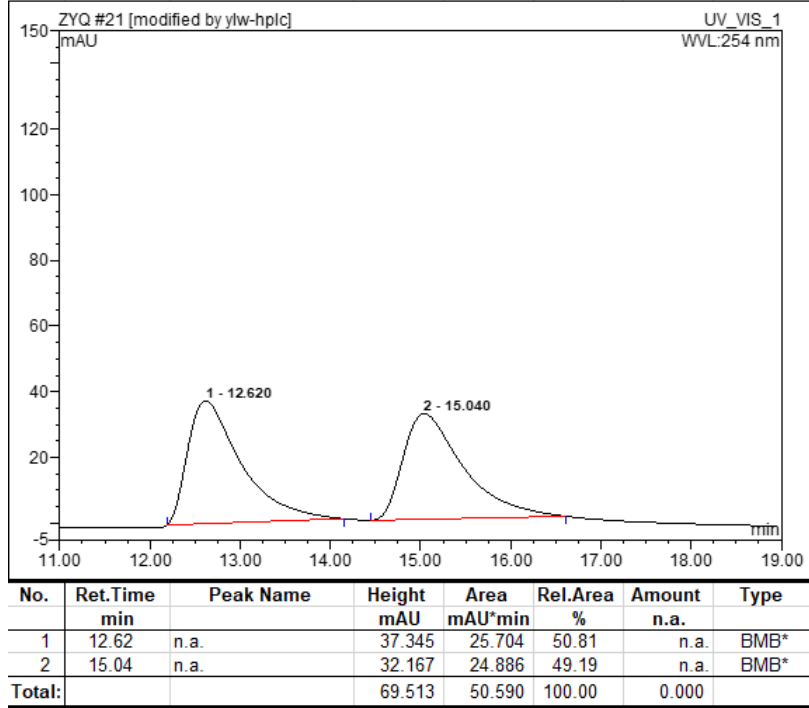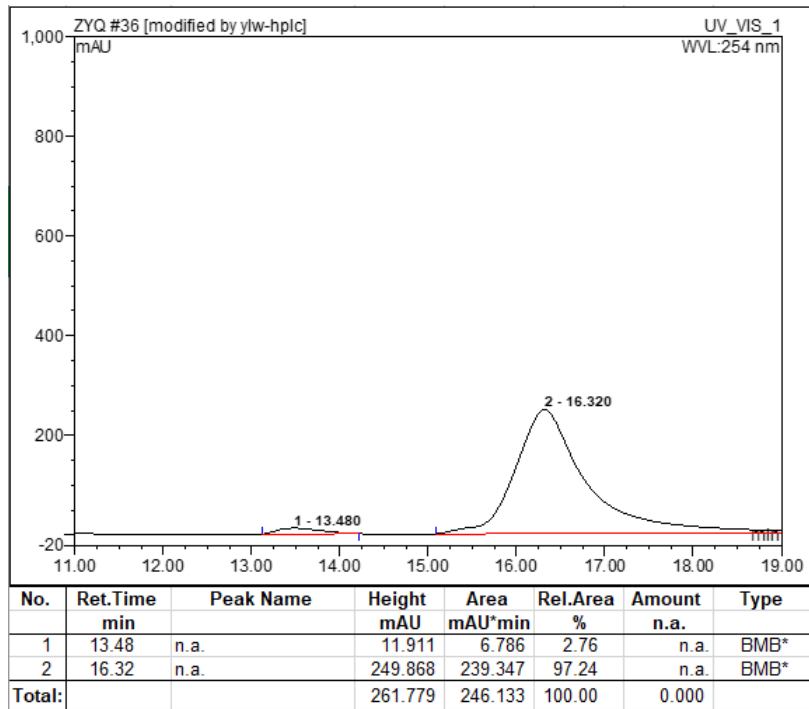

Compound **2d-ent**

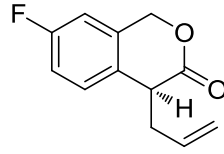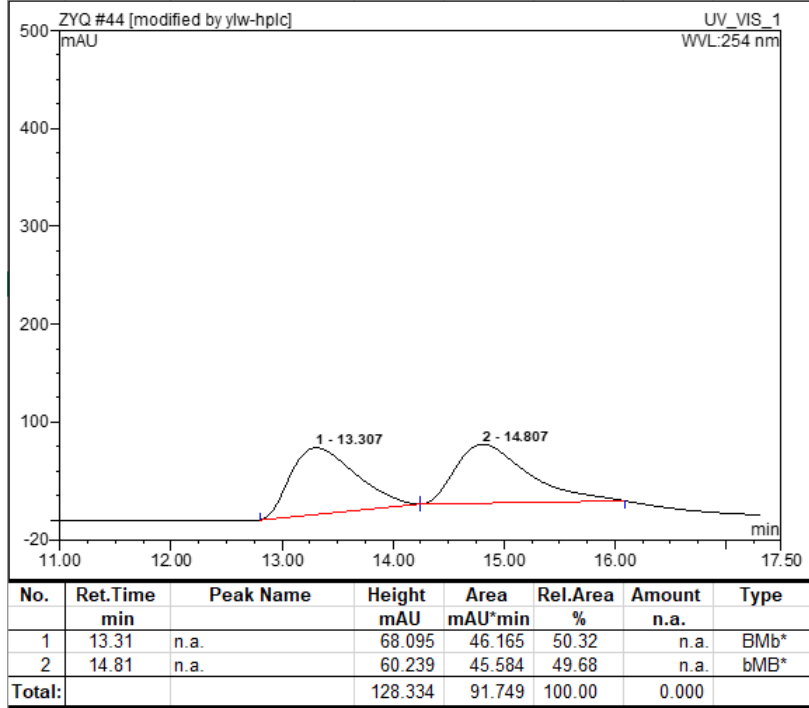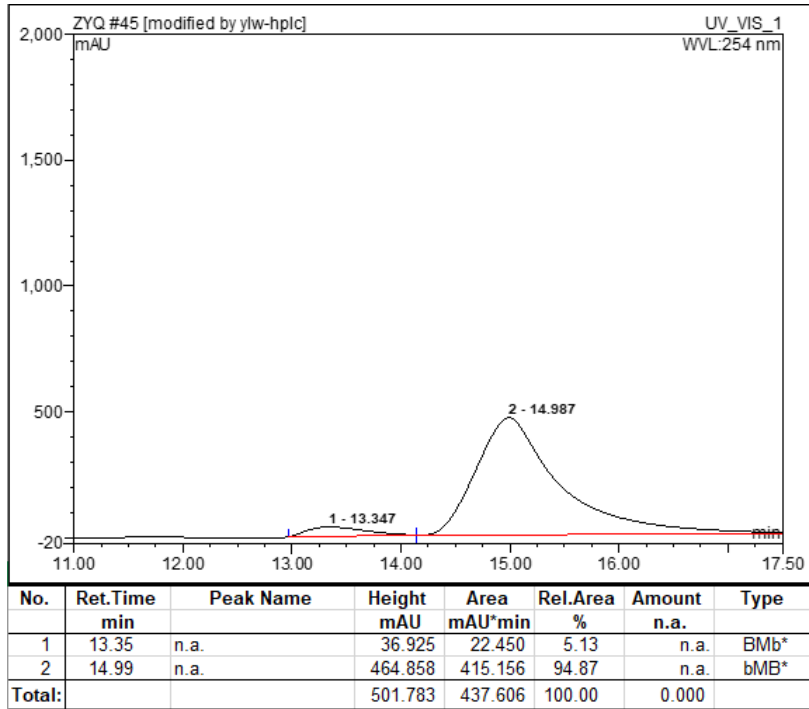

Compound **2g-ent**

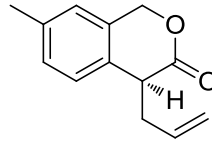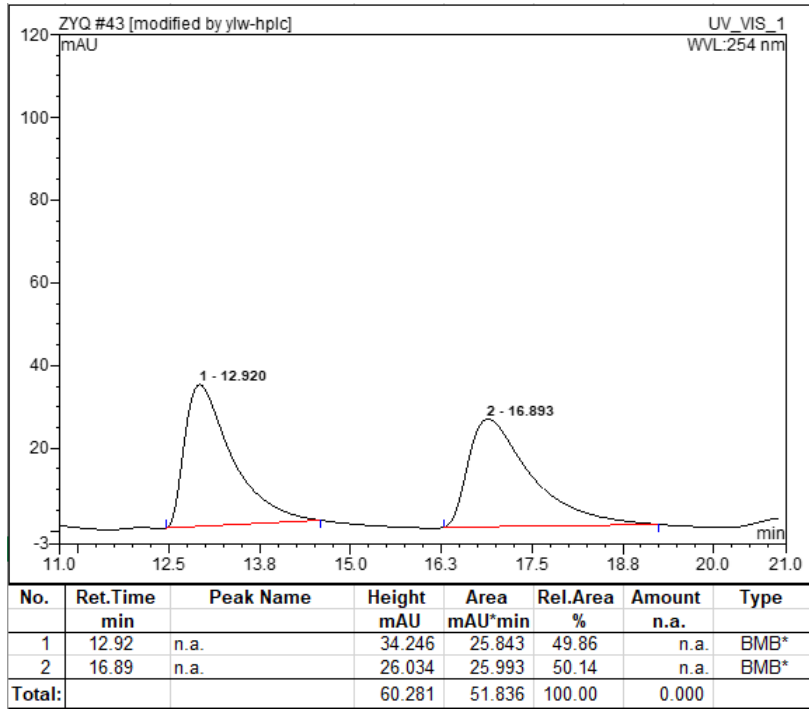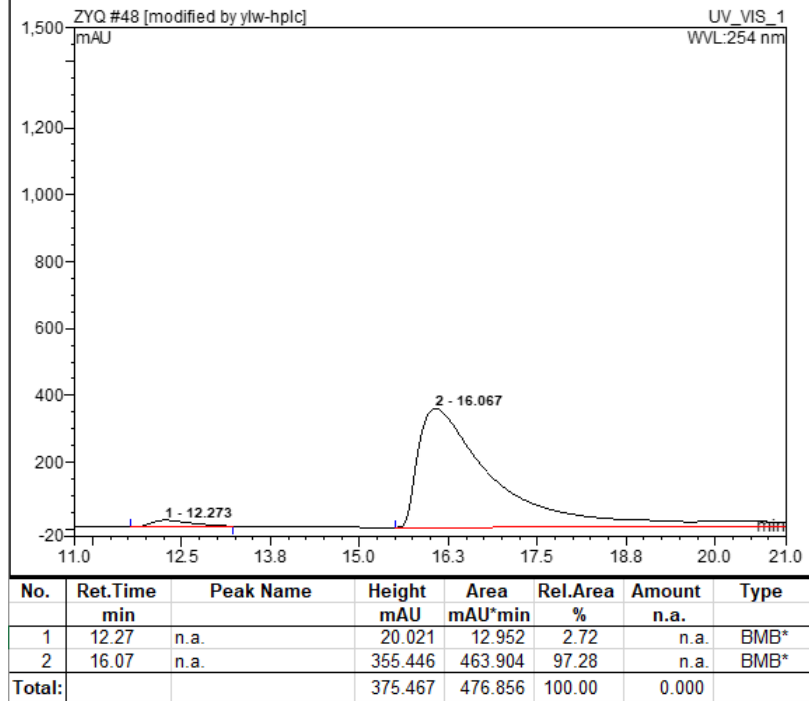

Compound **2h-ent**

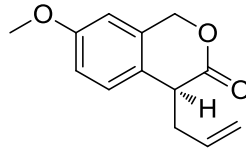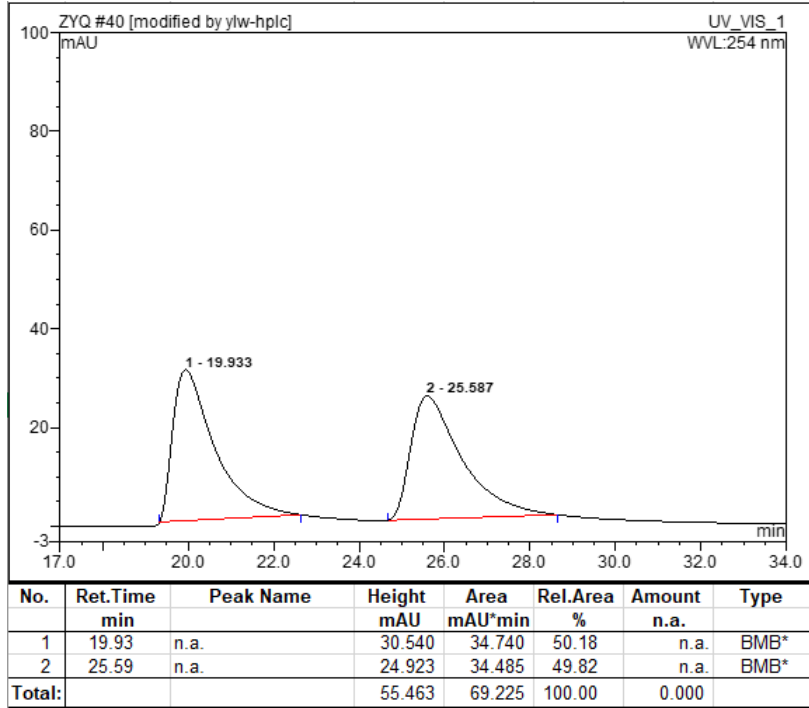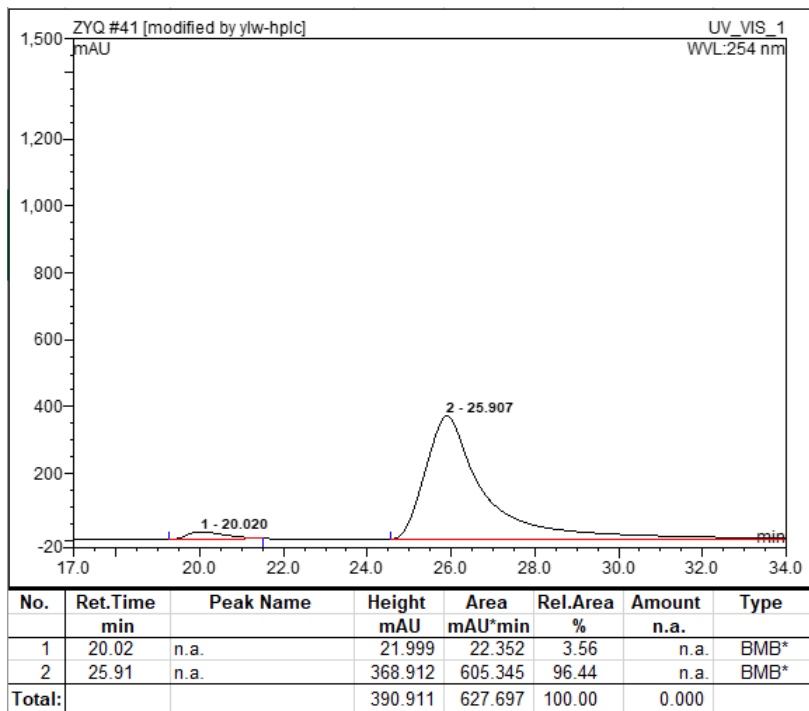

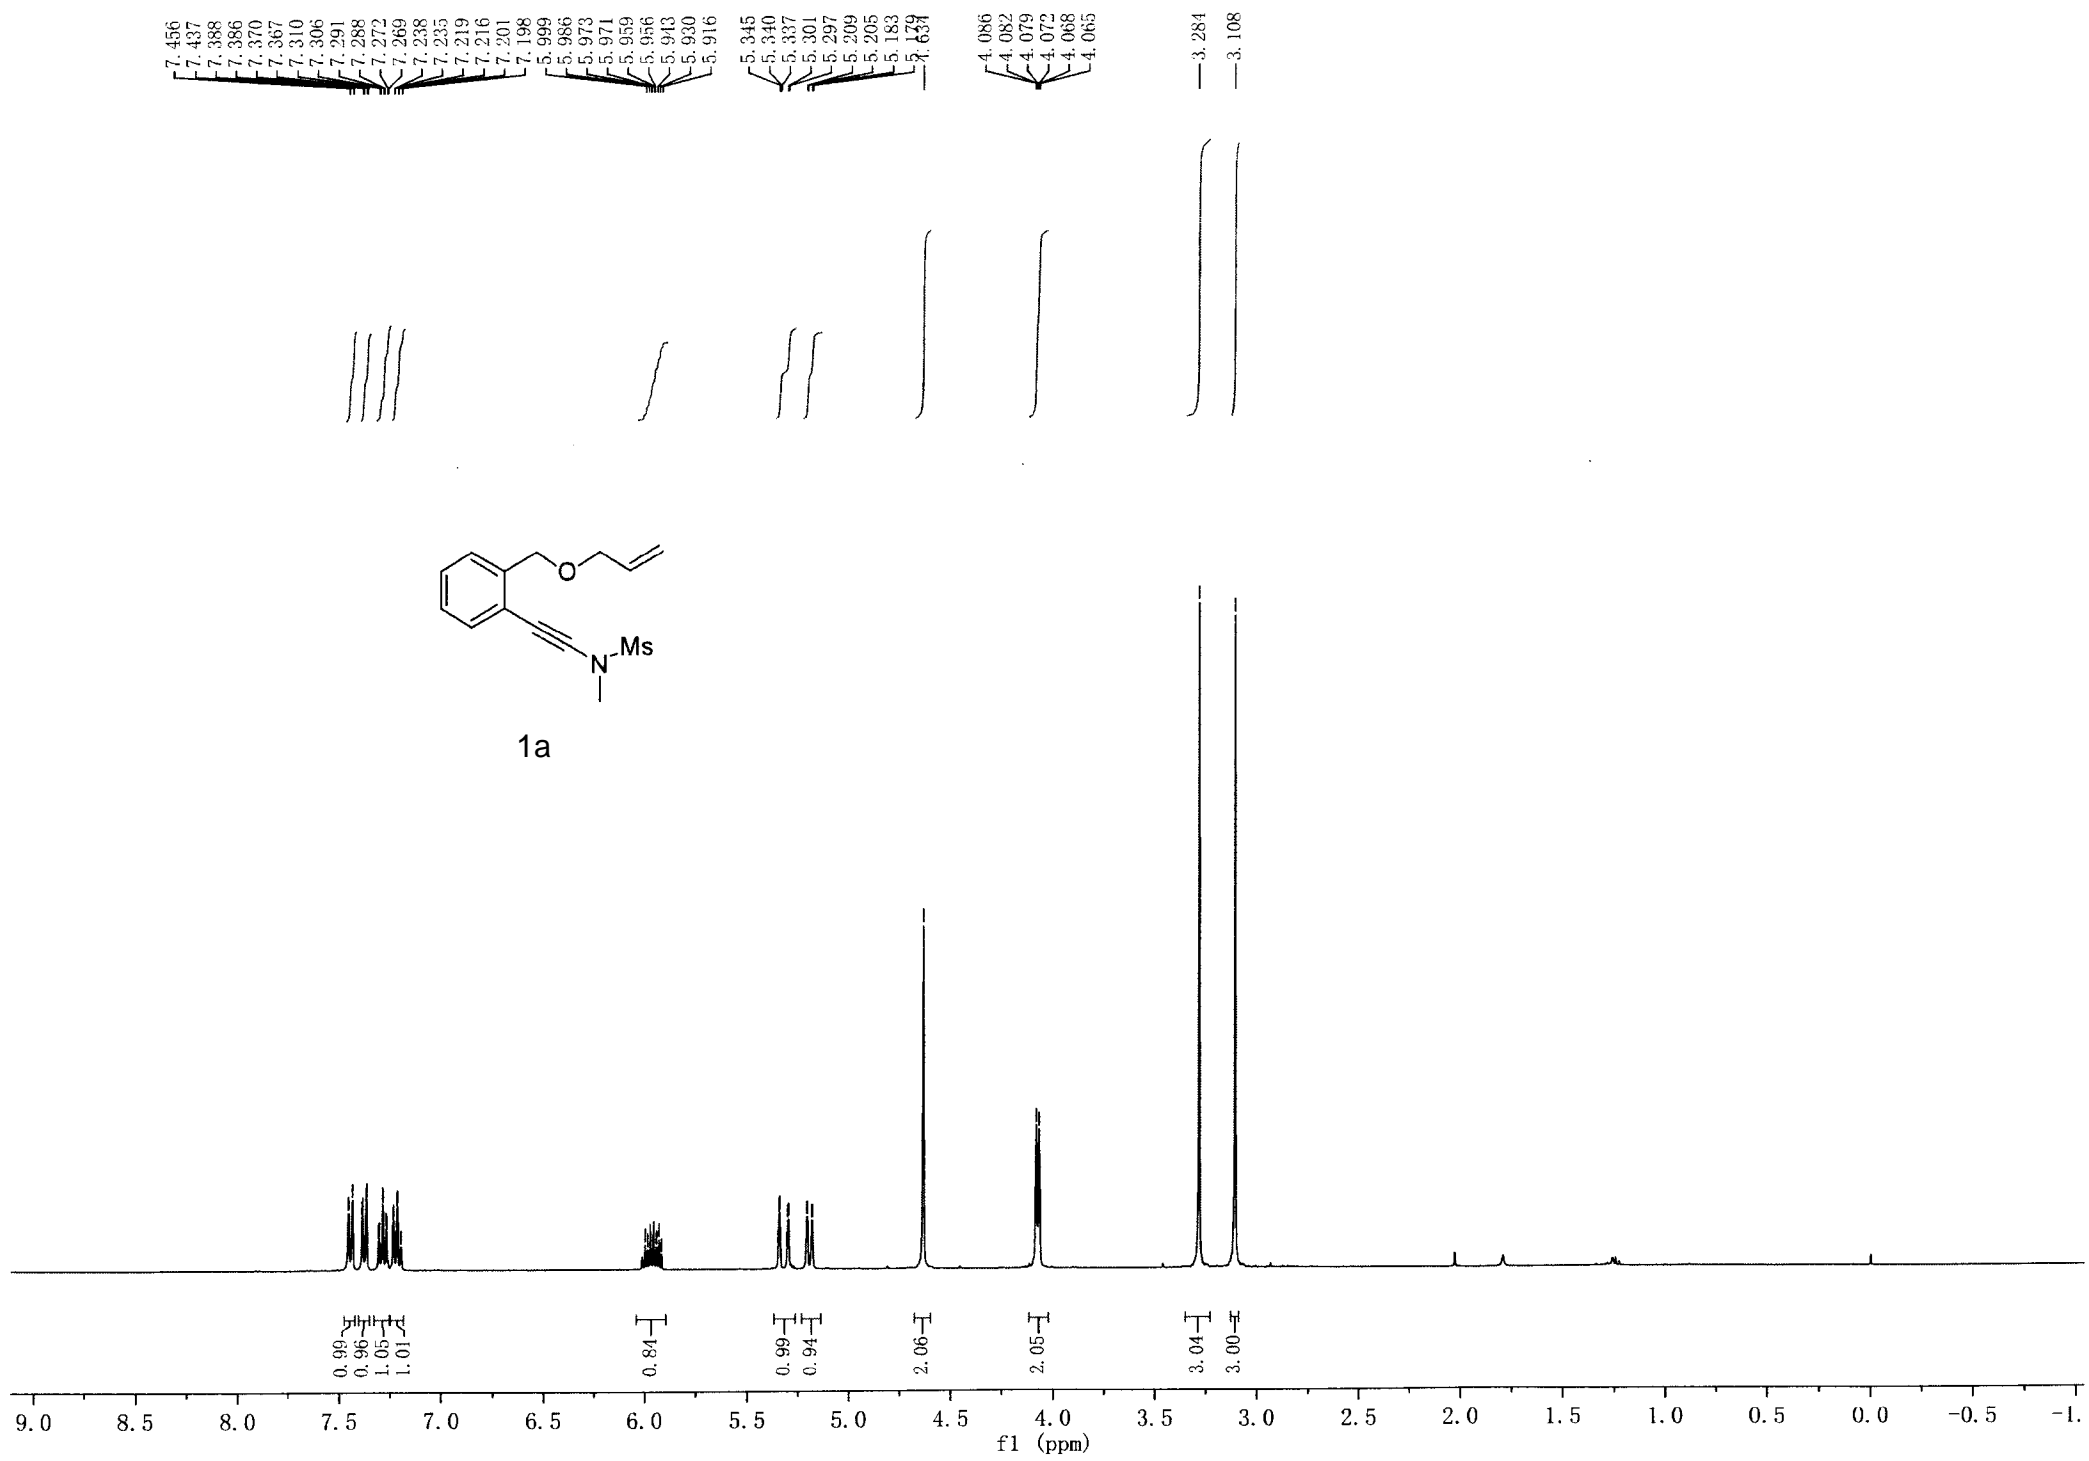

— 139.45  
— 134.65  
— 131.26  
— 127.90  
— 127.78  
— 127.22  
— 121.12  
— 116.87

— 87.30  
— 77.32  
— 77.00  
— 76.68  
— 71.34  
— 70.25  
— 67.40

— 39.00  
— 36.66

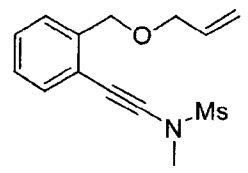

1a

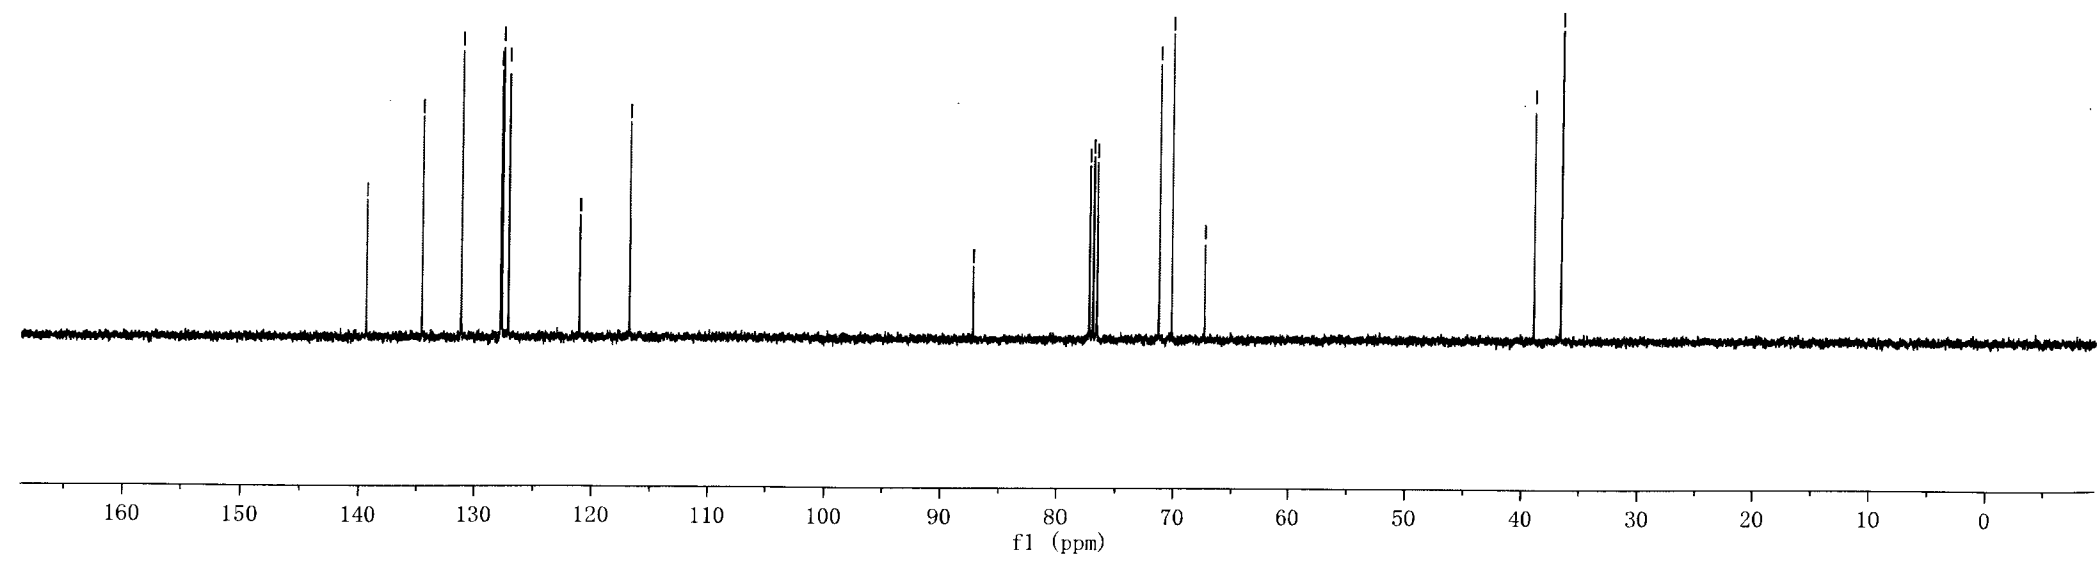

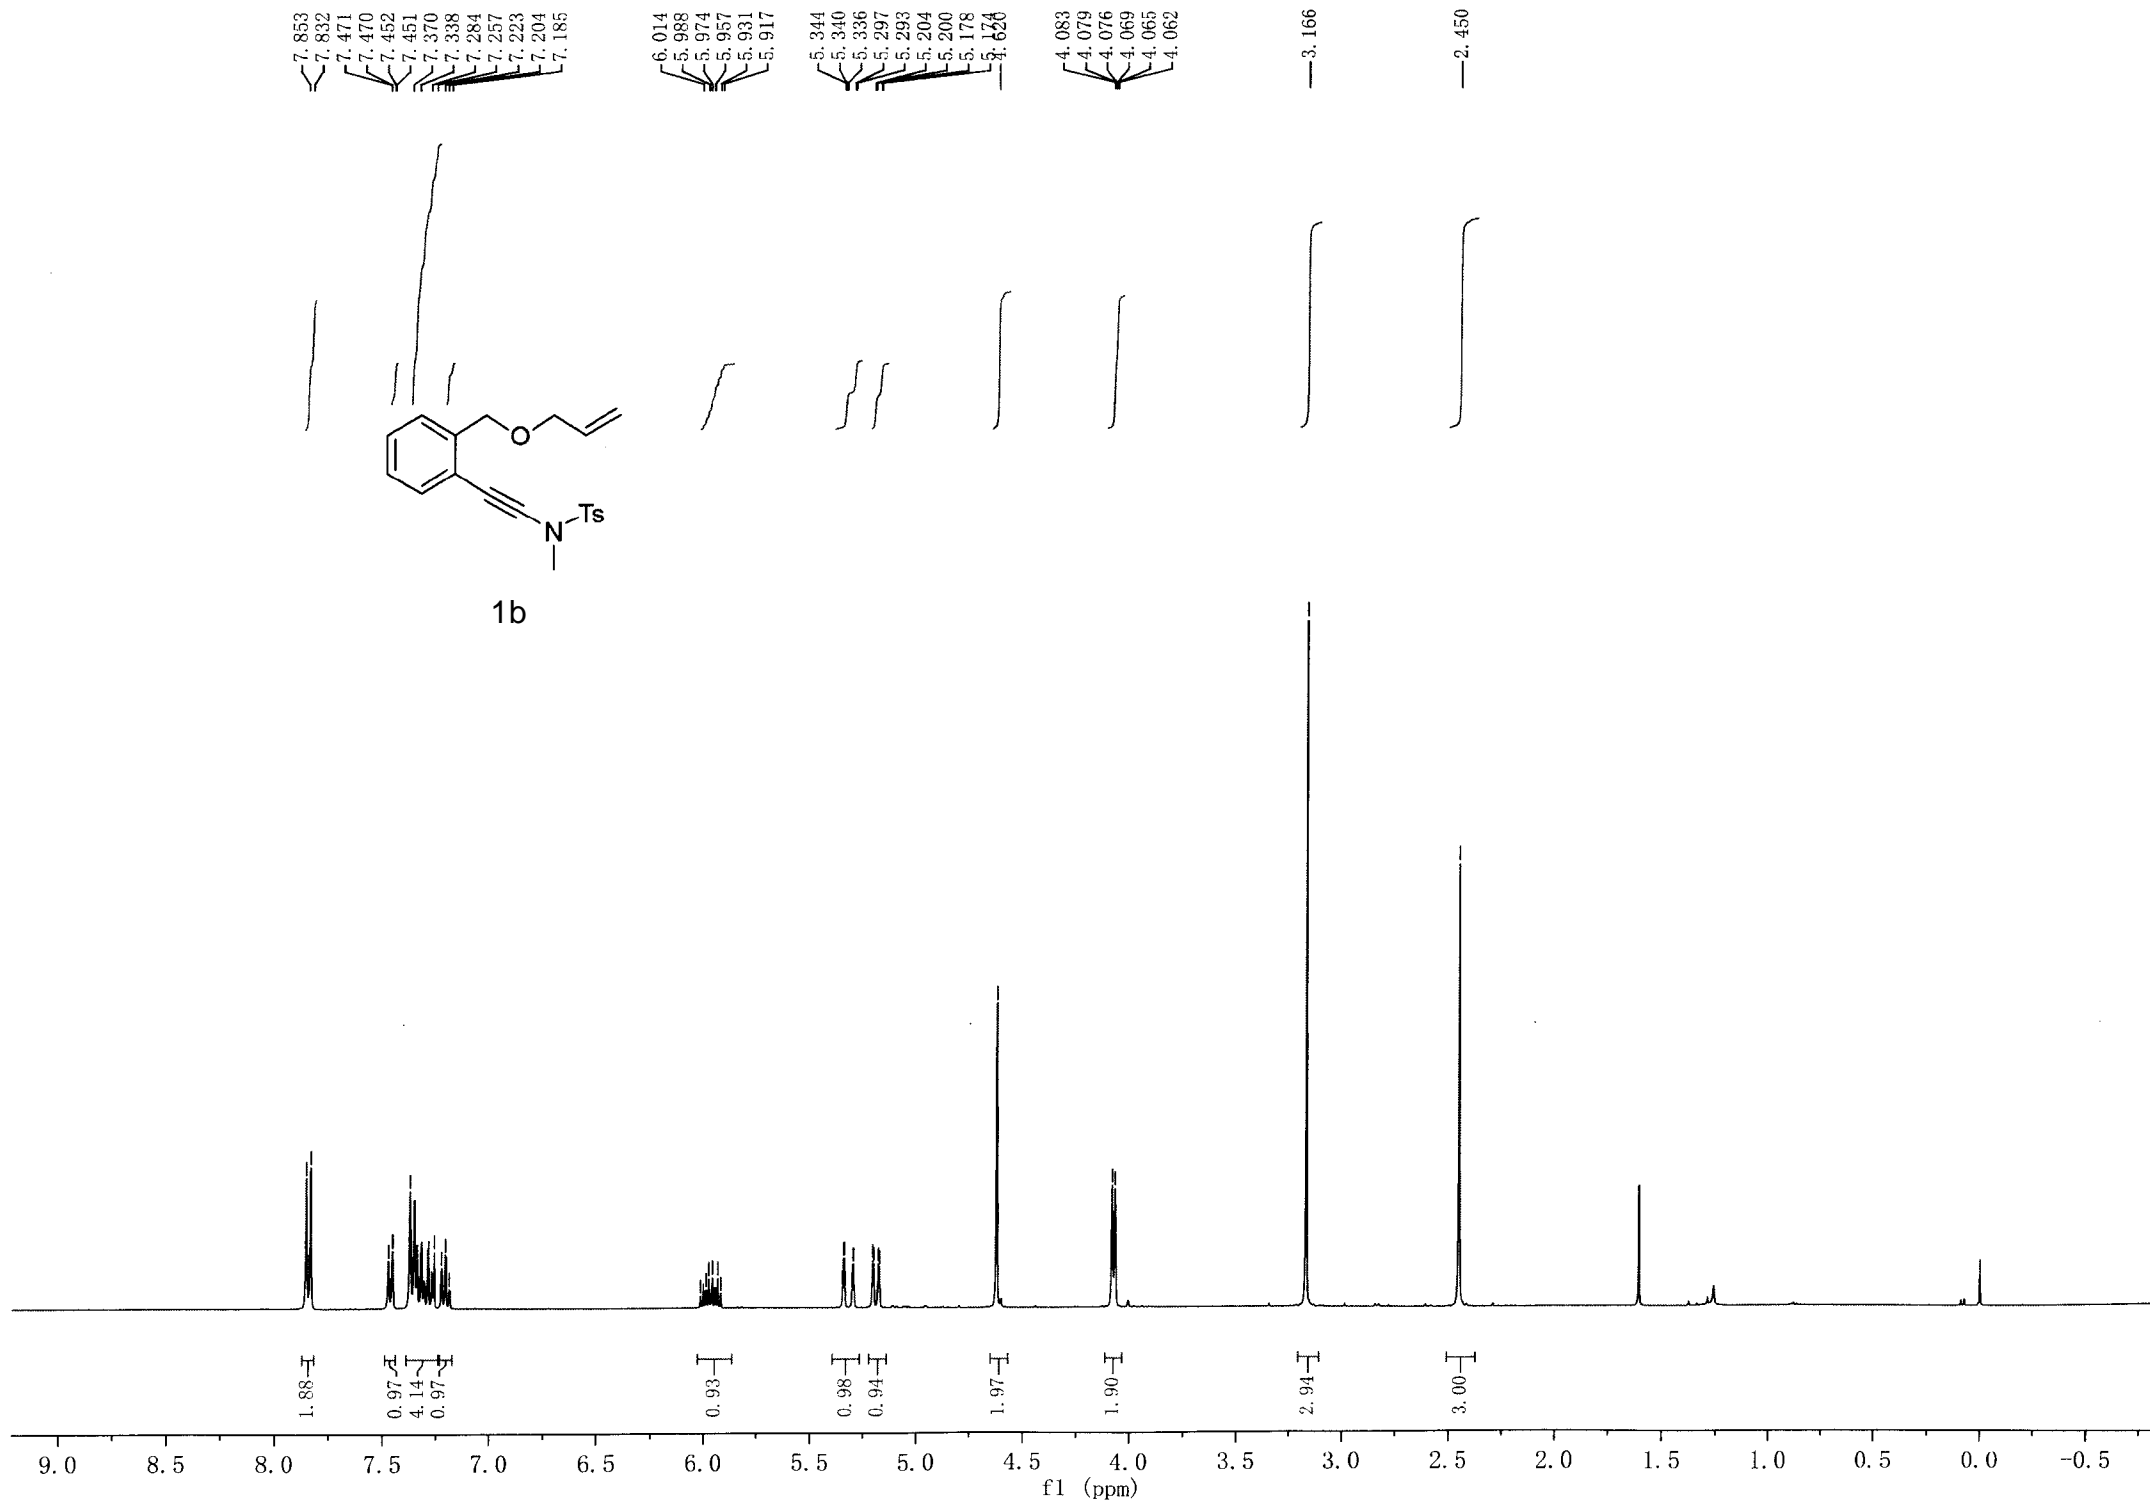



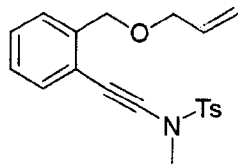

1b

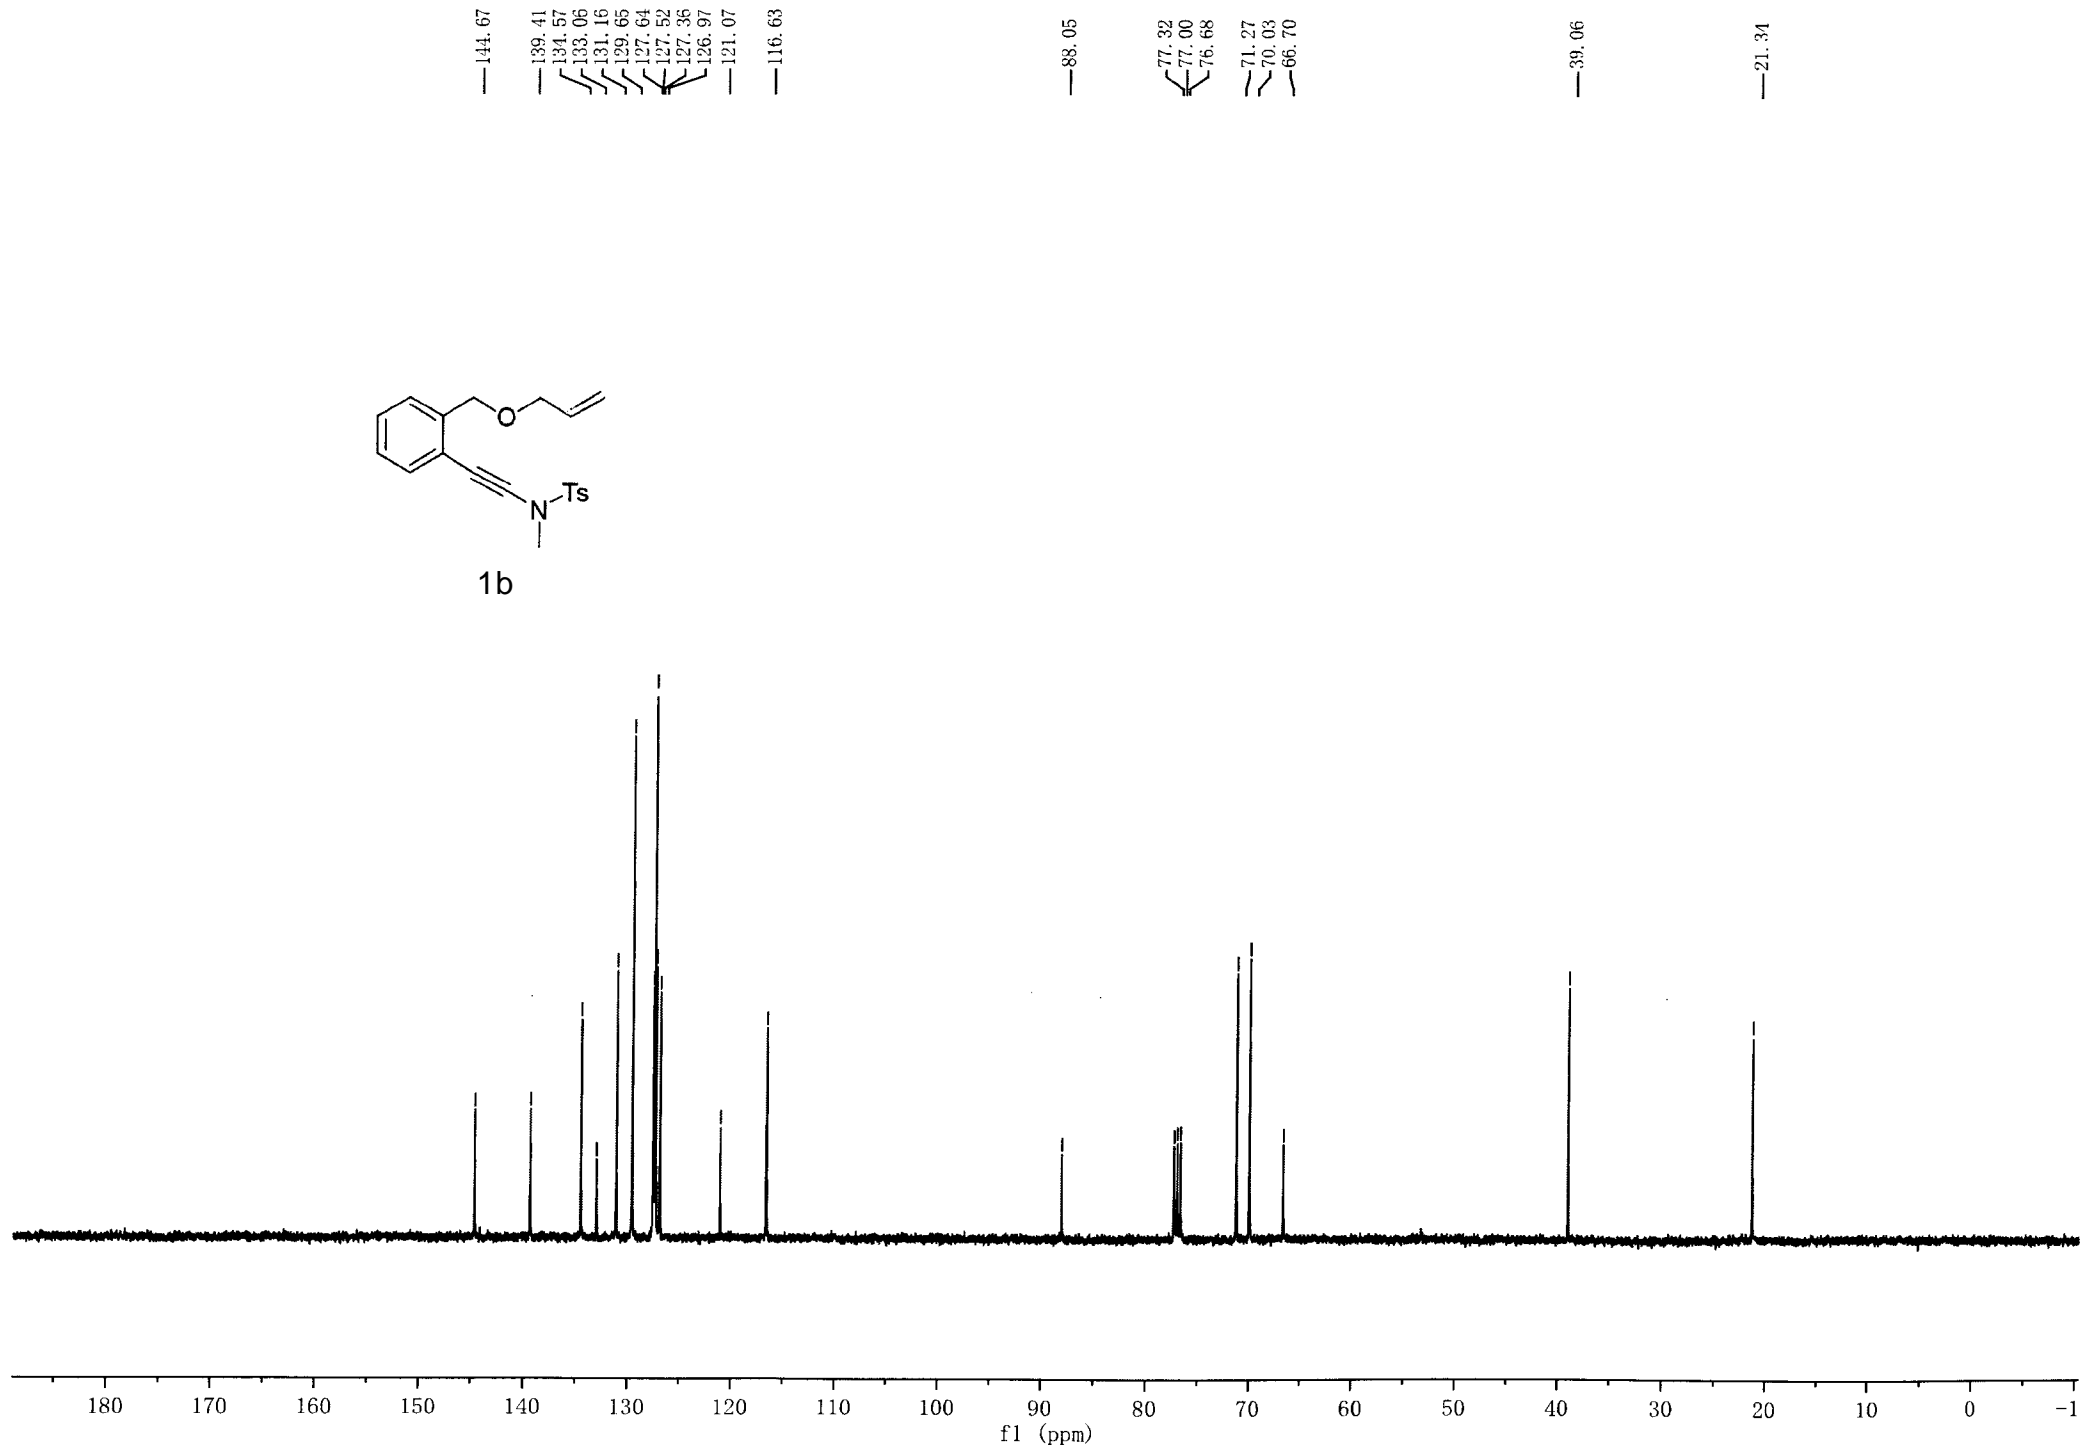

7.821  
7.801  
7.689  
7.669  
7.461  
7.443  
7.336  
7.317  
7.296  
7.278  
7.259  
7.238  
7.213  
7.195  
7.177  
6.003  
5.991  
5.980  
5.965  
5.951  
5.937  
5.925  
5.336  
5.293  
5.196  
5.170  
— 1.603  
4.072  
4.062  
— 3.164

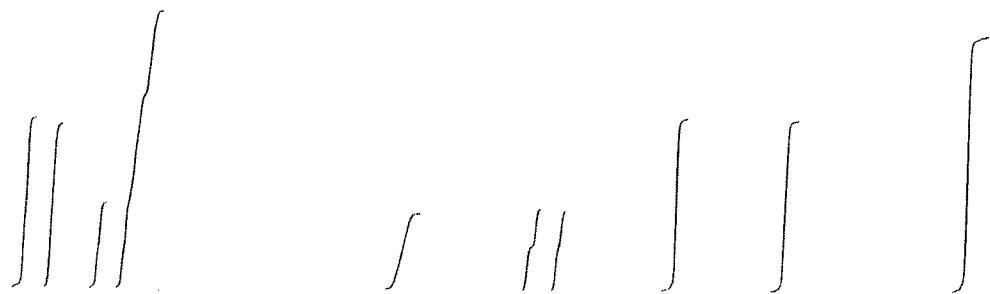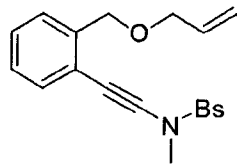

1c

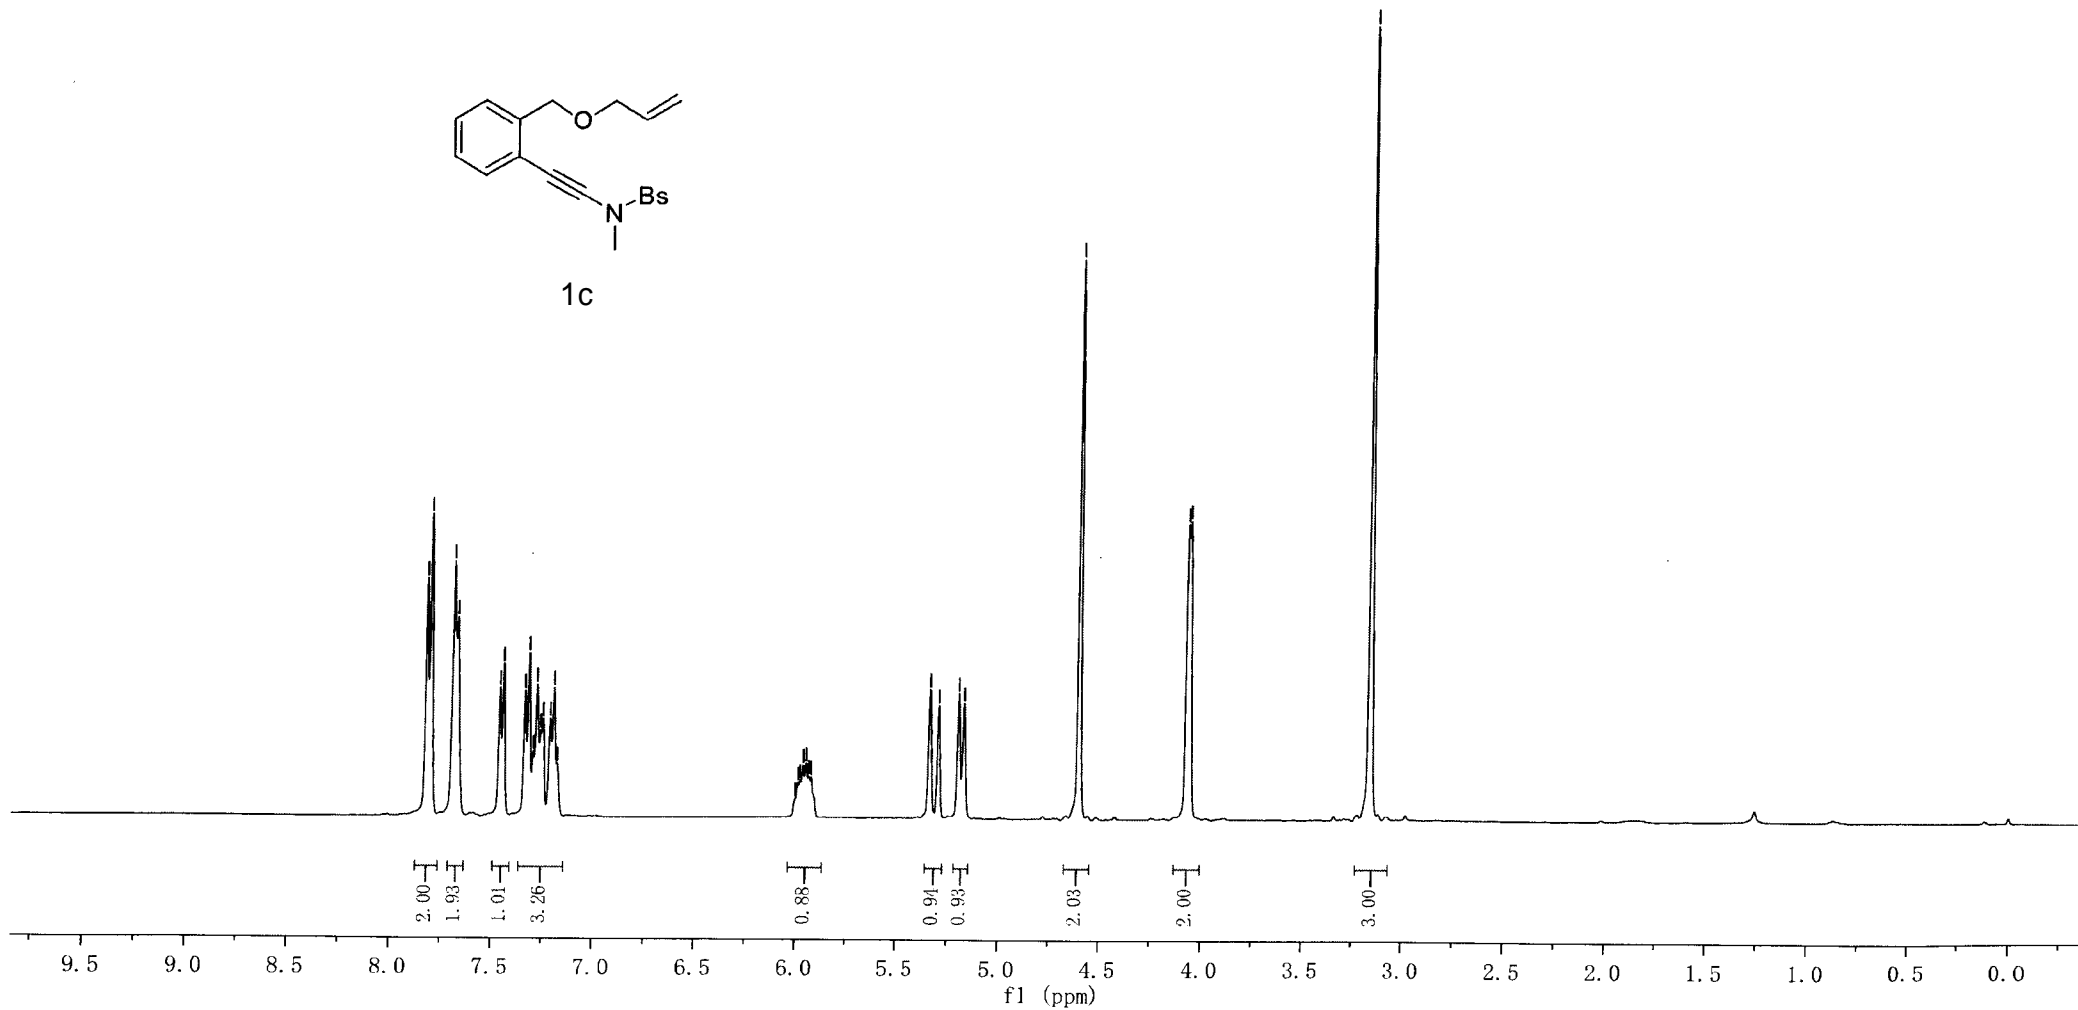

139.29  
134.72  
134.45  
132.19  
131.10  
128.83  
128.62  
127.69  
127.44  
126.94  
120.68  
116.50

87.32

77.32  
77.00  
76.68

71.06  
69.88  
66.89

39.03

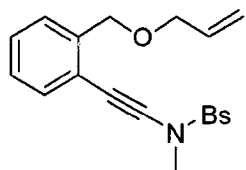

1c

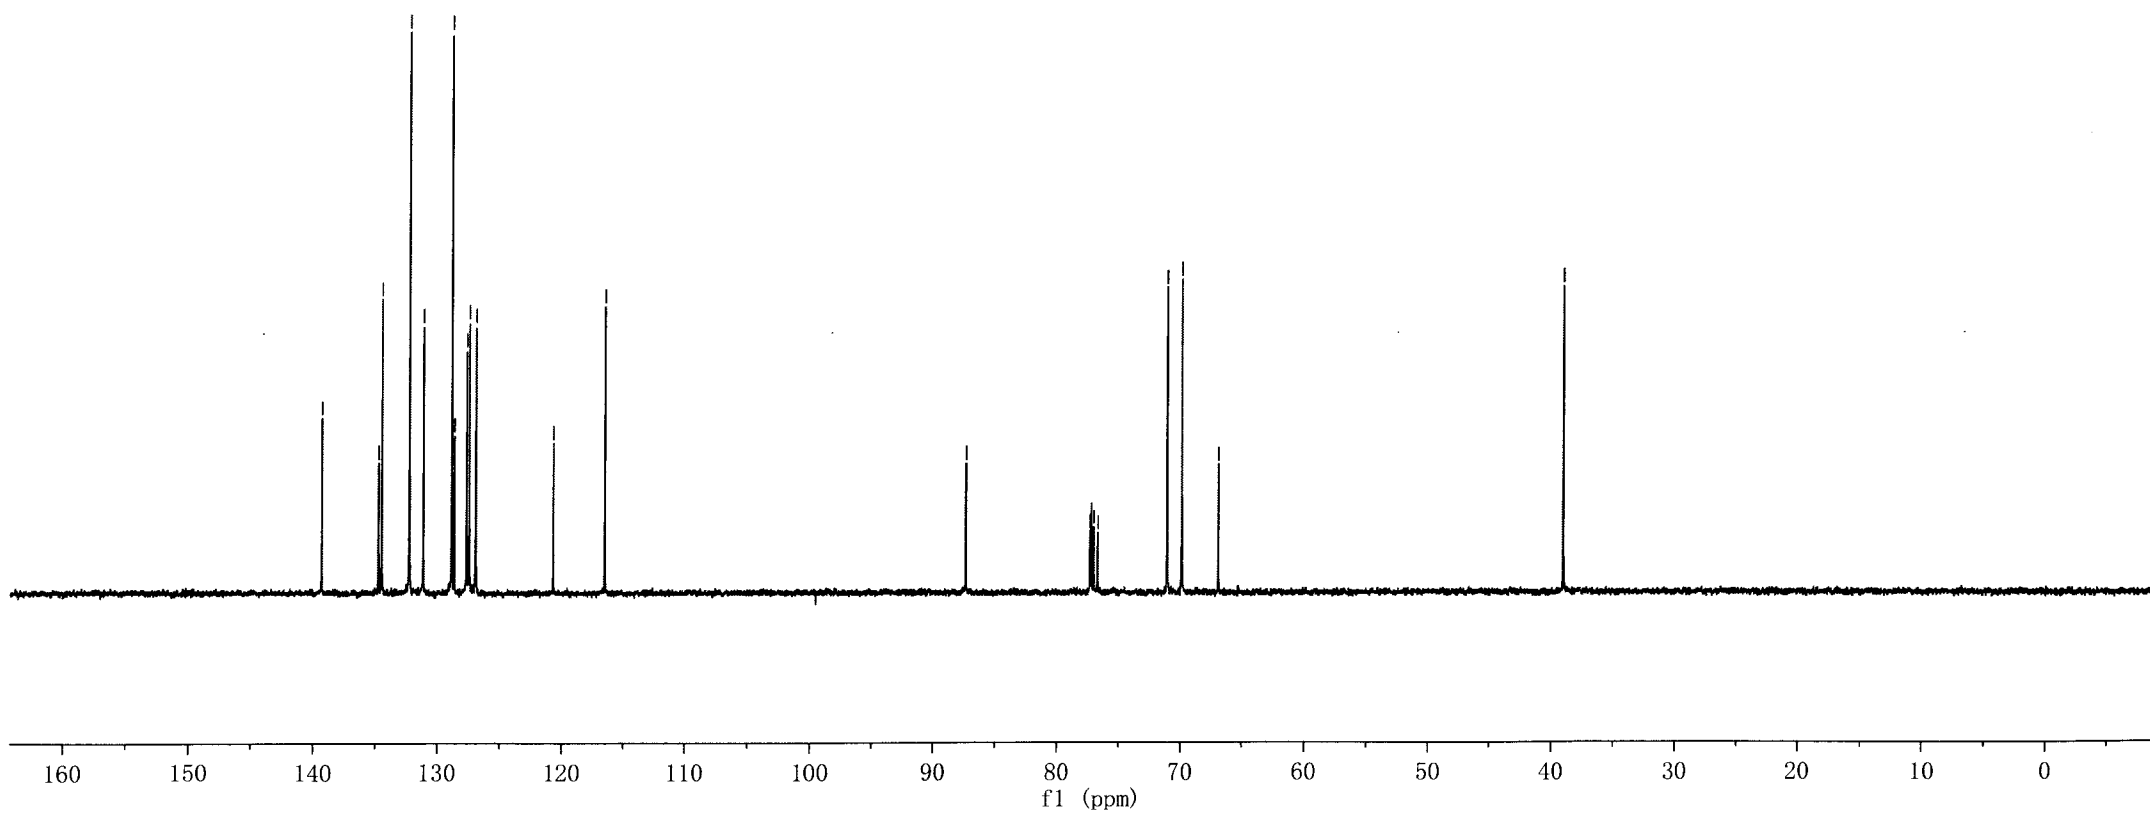

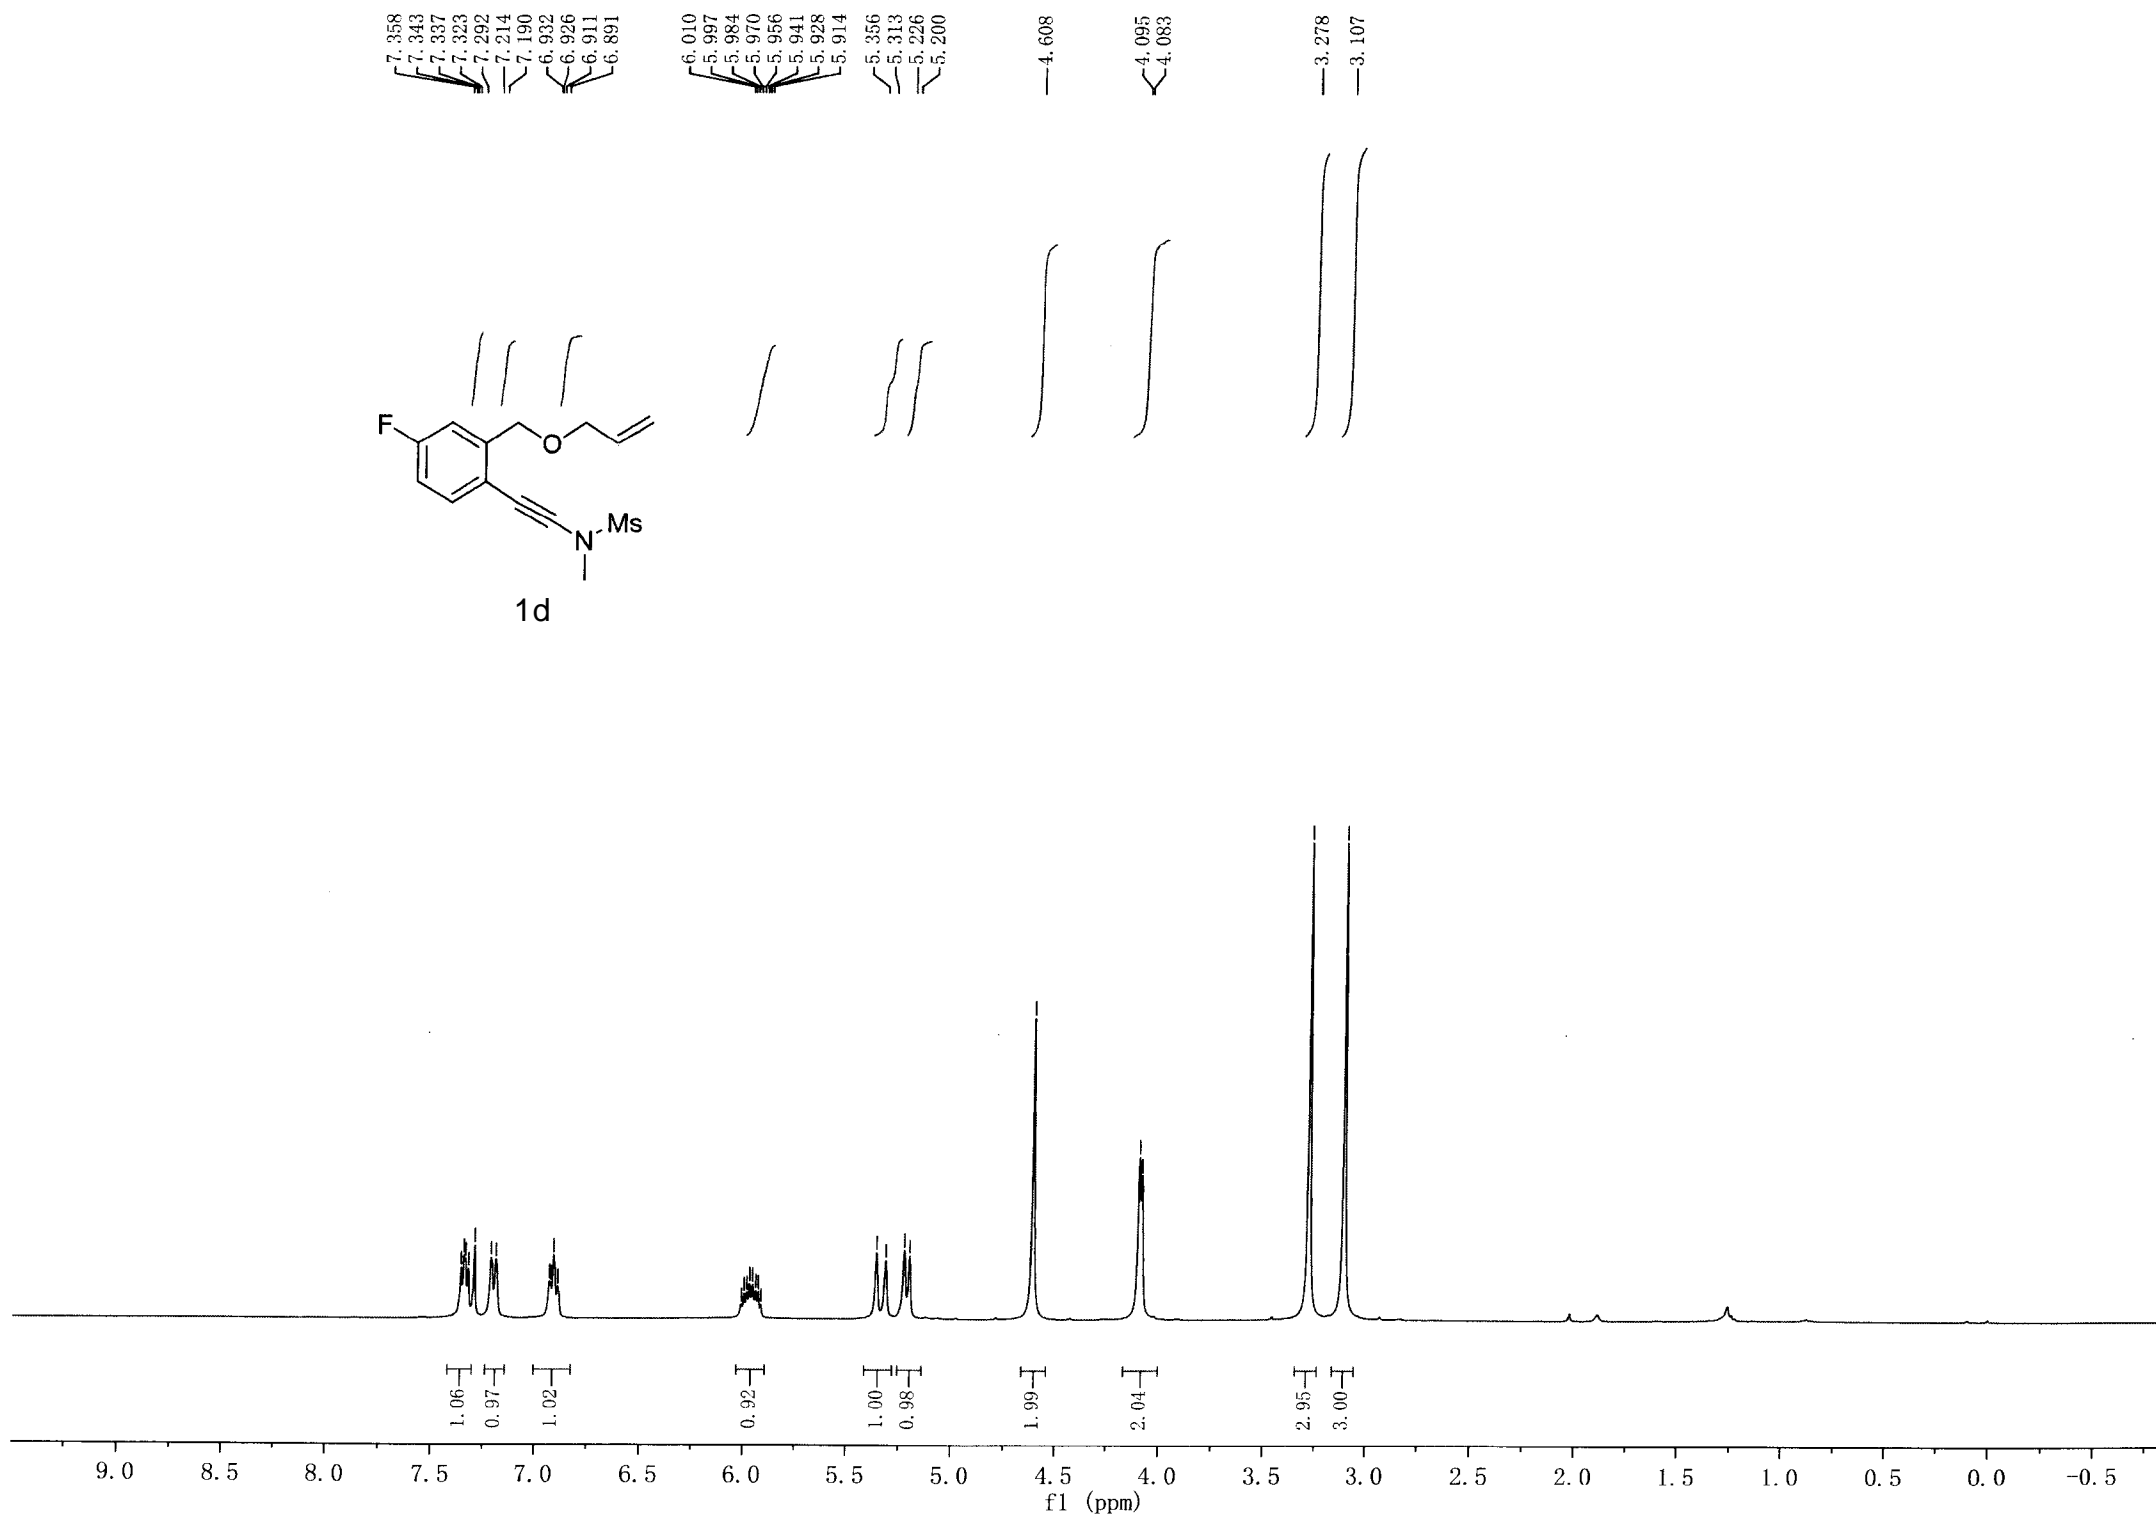

163.45  
160.98

142.81  
142.73

134.27  
133.11  
133.03

116.96  
116.37  
116.34  
114.36  
114.15  
114.13  
113.93

87.01

77.32  
77.00  
76.68

71.42  
69.45  
65.98

38.88  
36.52

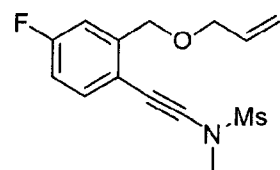

1d

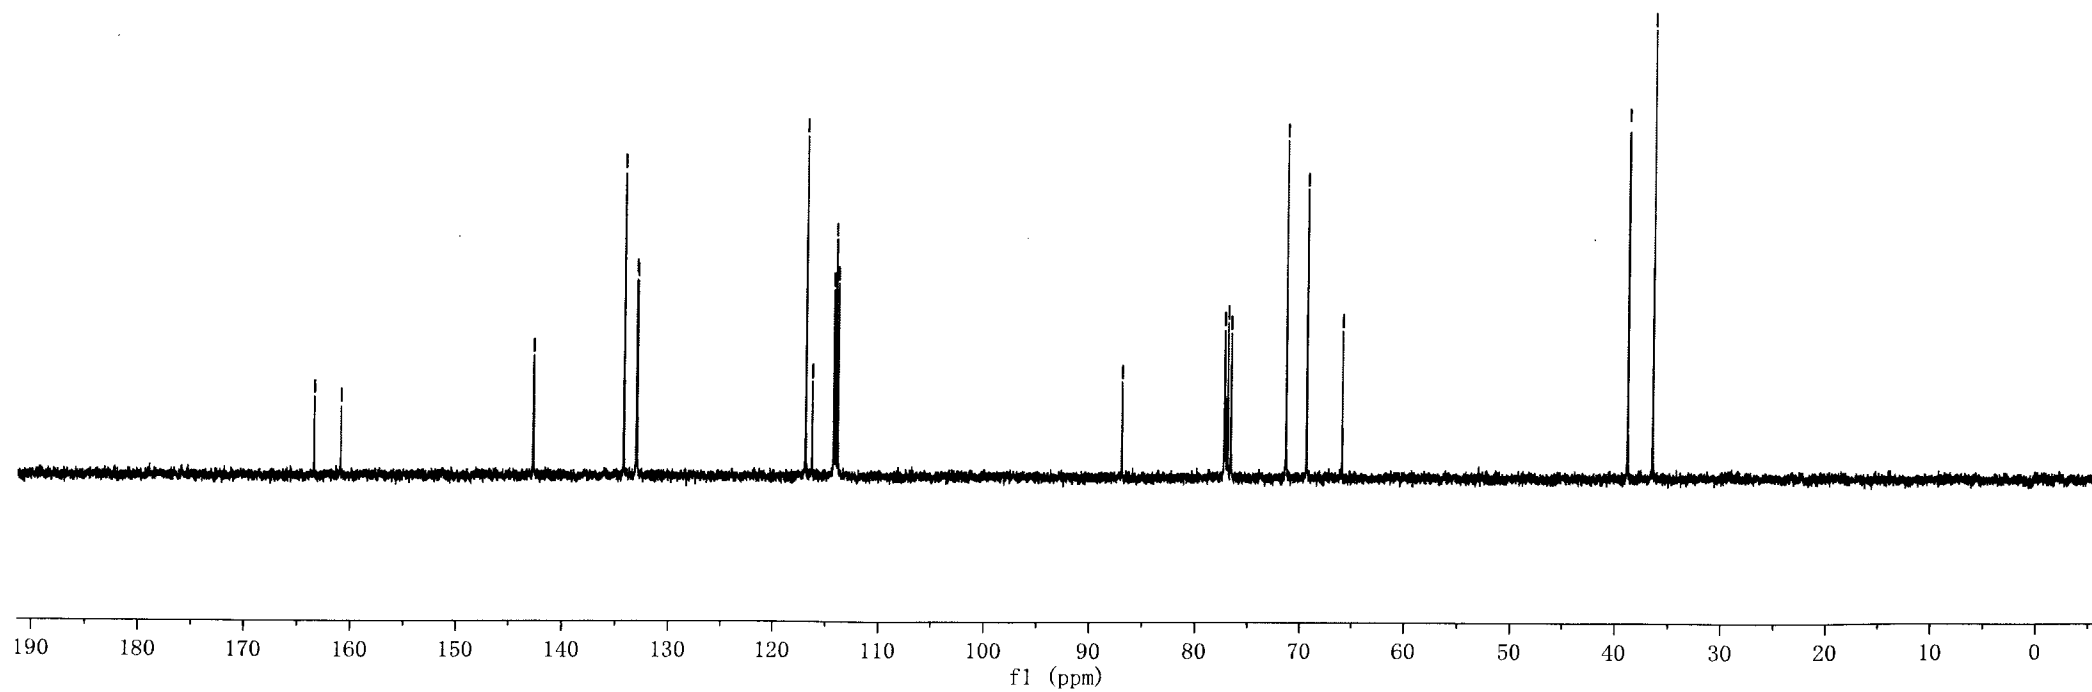

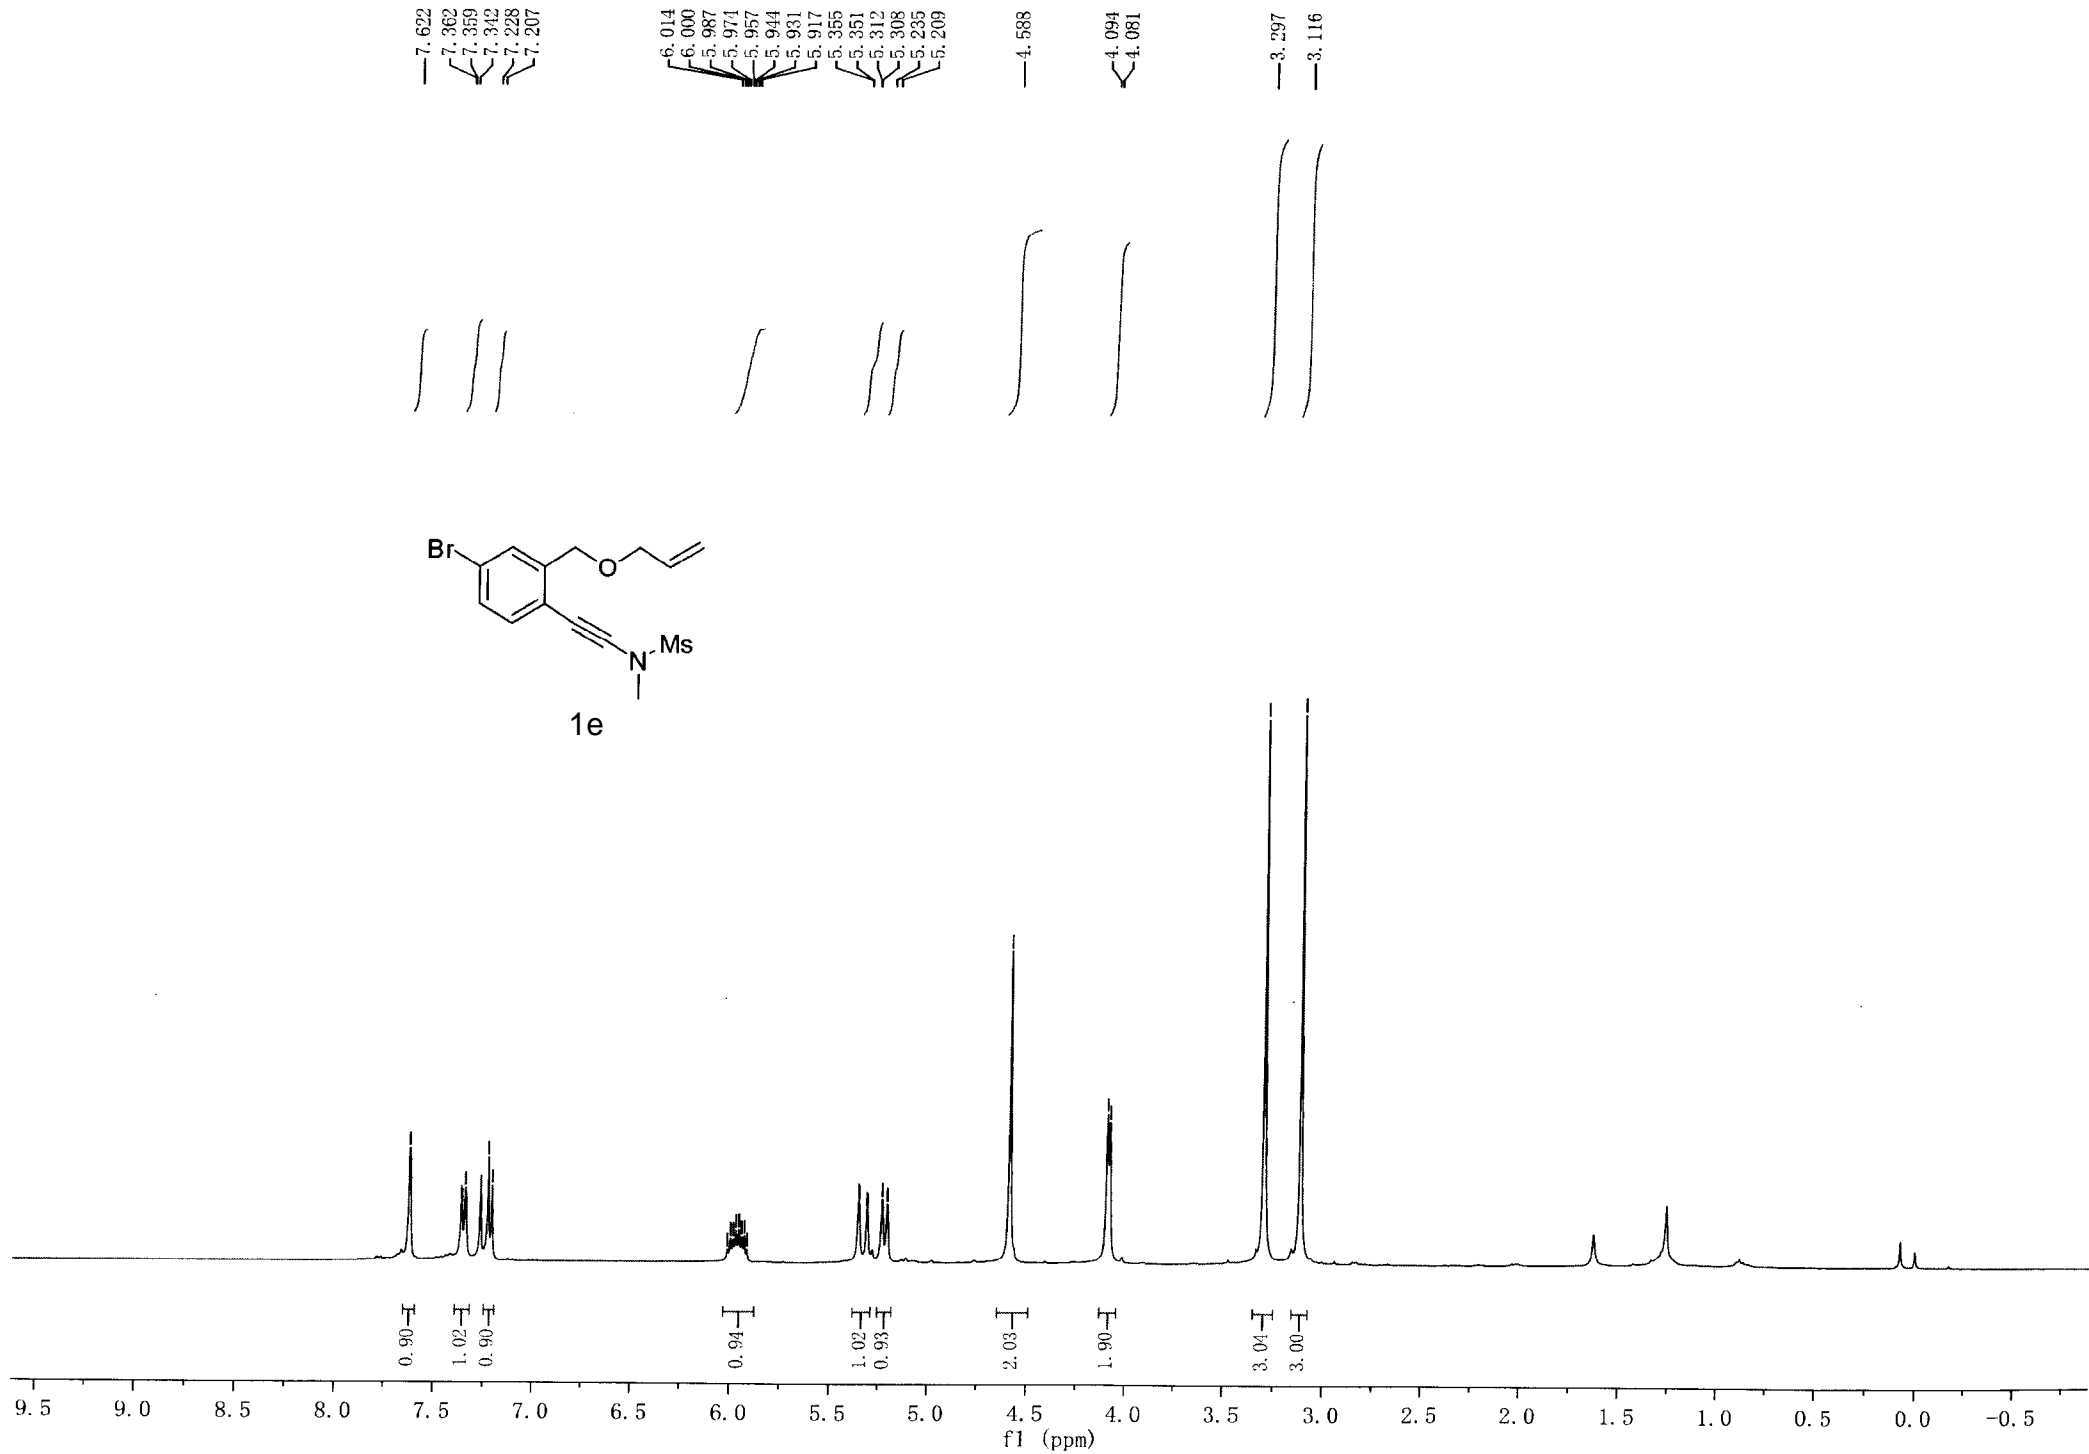

141.71  
134.43  
132.49  
130.60  
130.32  
122.15  
119.85  
117.30  
88.47  
77.32  
77.00  
76.68  
71.70  
69.65  
66.77  
39.01  
37.01

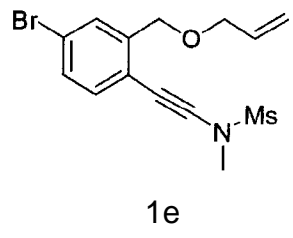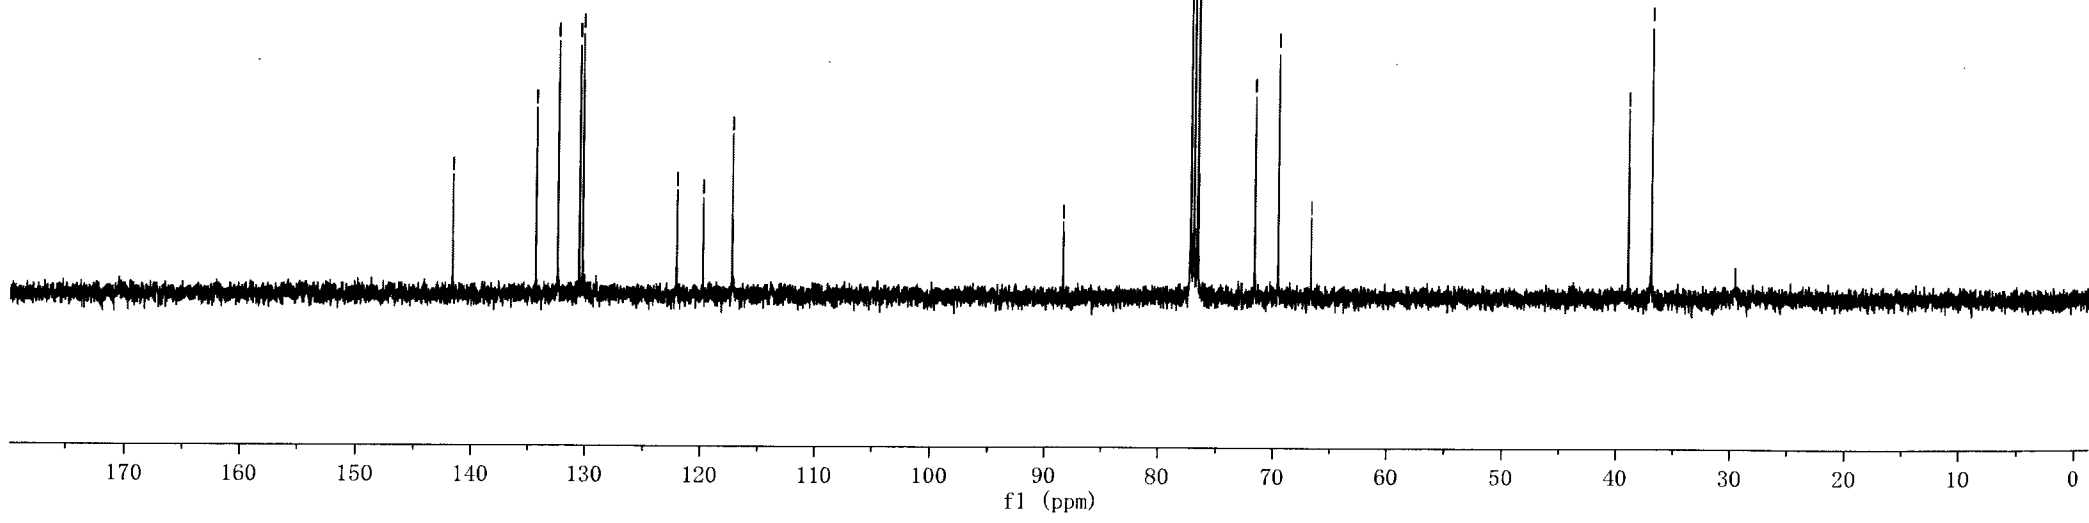

7.750  
7.500  
7.496  
7.479  
7.475  
7.466  
7.446  
7.284  
6.043  
6.029  
6.017  
6.015  
6.003  
6.000  
5.989  
5.986  
5.974  
5.972  
5.960  
5.946  
5.381  
5.376  
5.337  
5.333  
5.265  
5.262  
5.258  
5.236  
5.232  
4.661  
4.143  
4.140  
4.136  
4.129  
4.125  
4.122  
3.342  
3.152

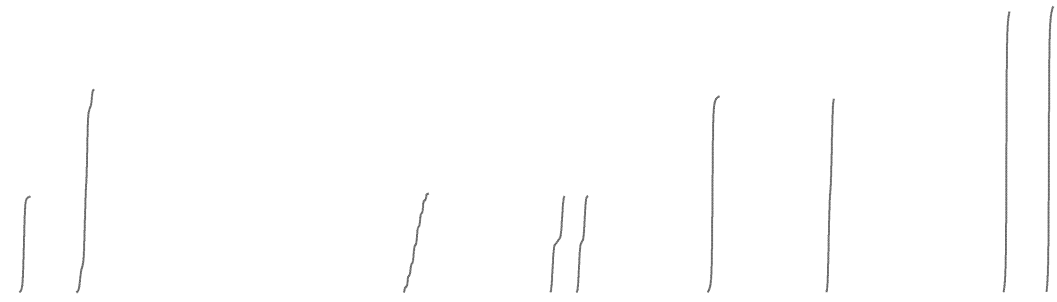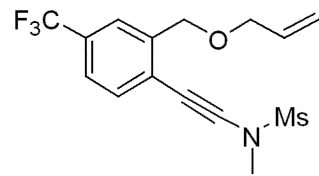

1f

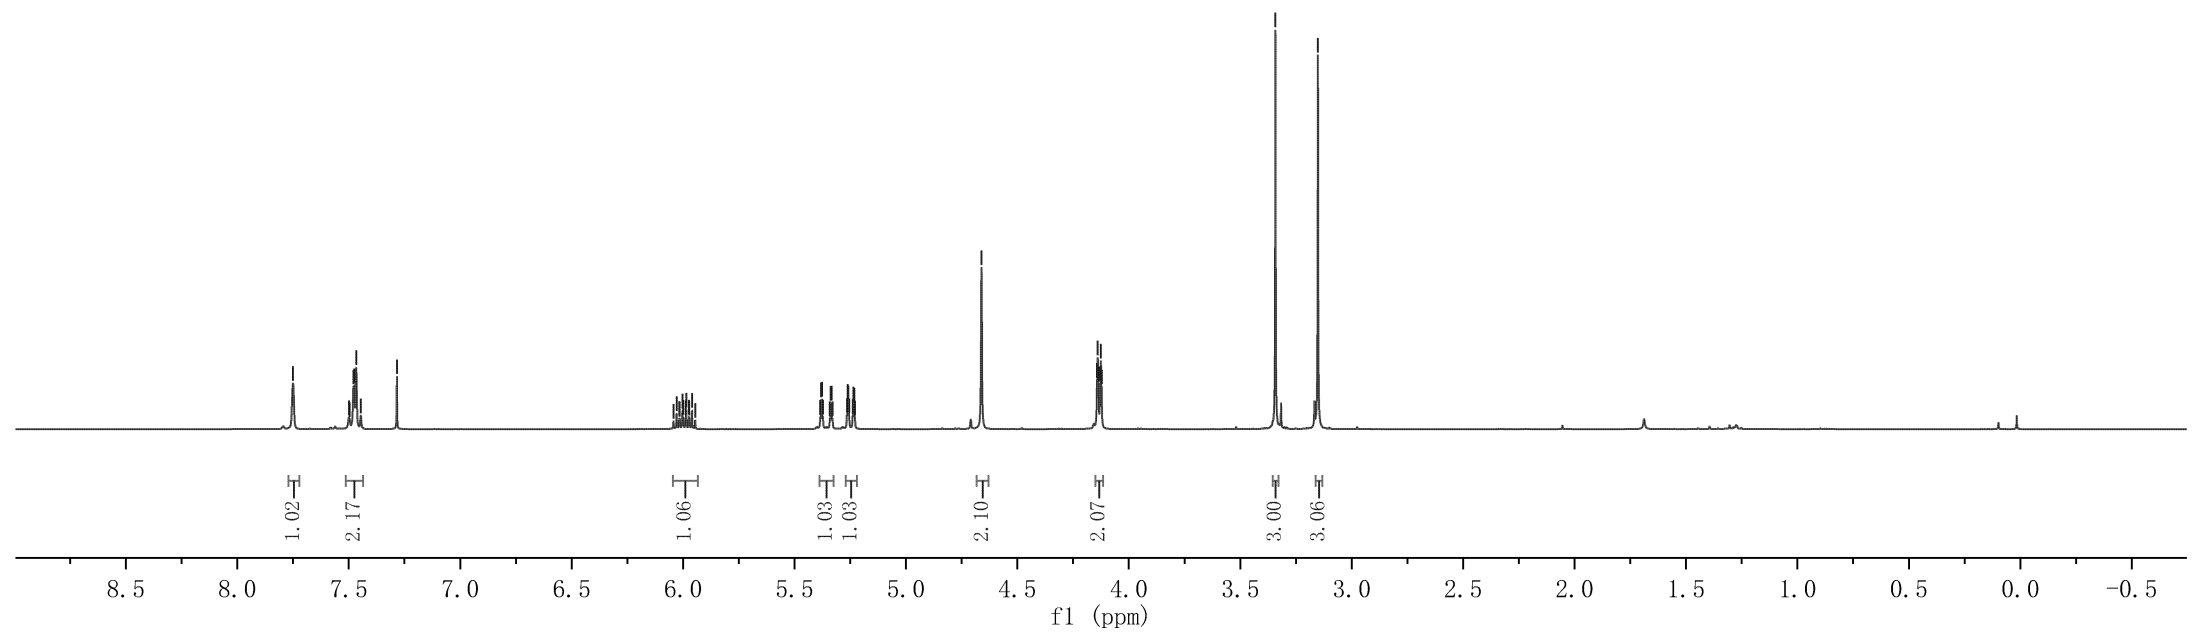



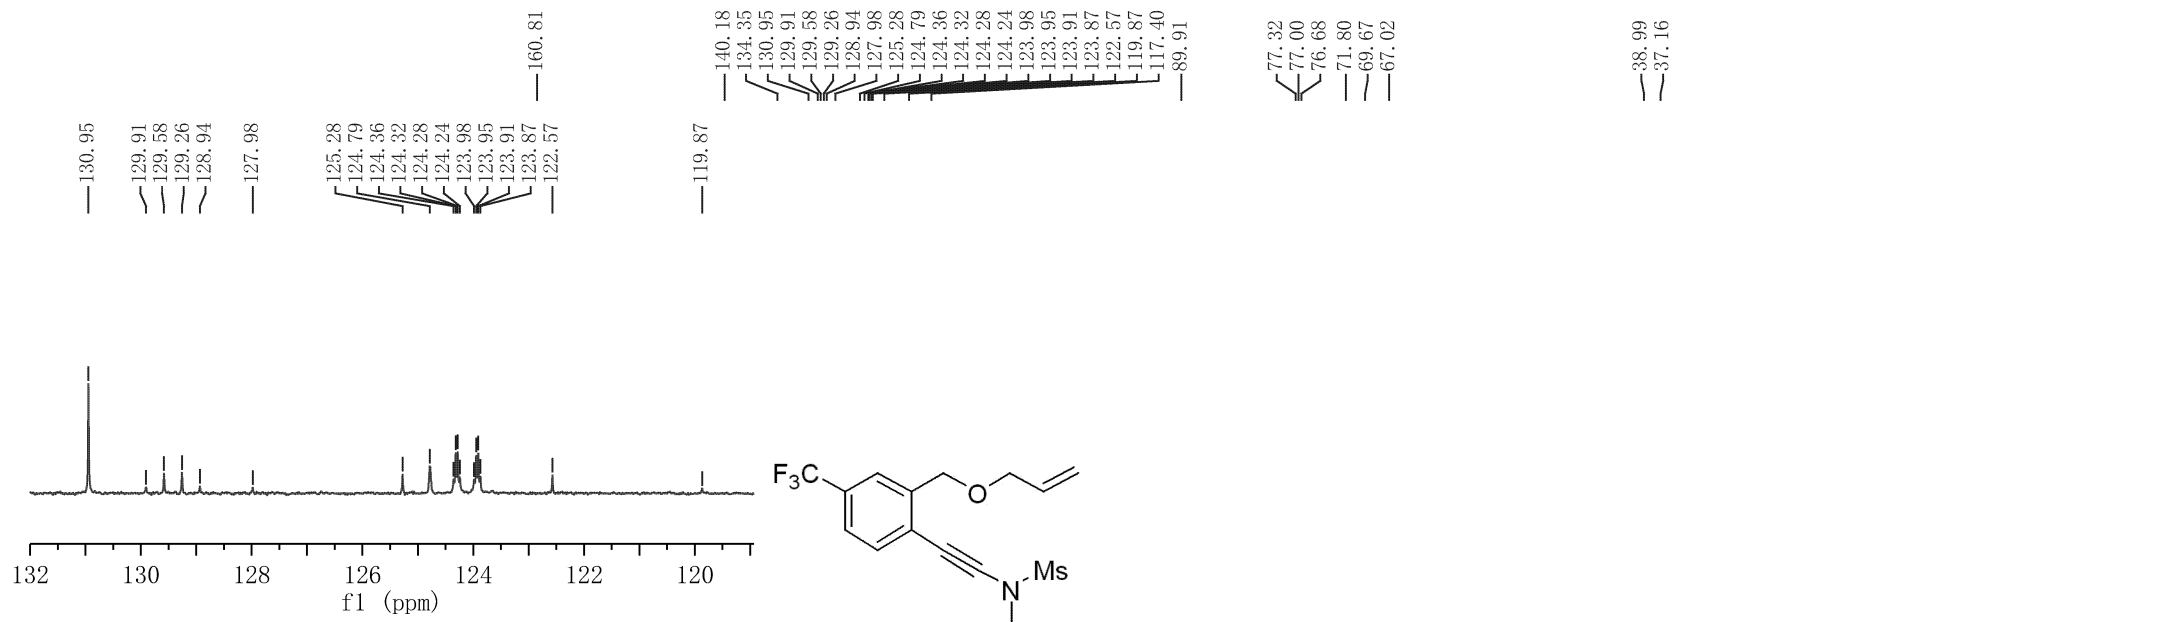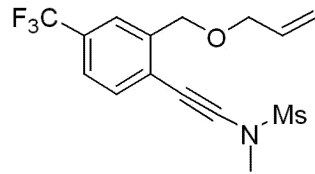

1f

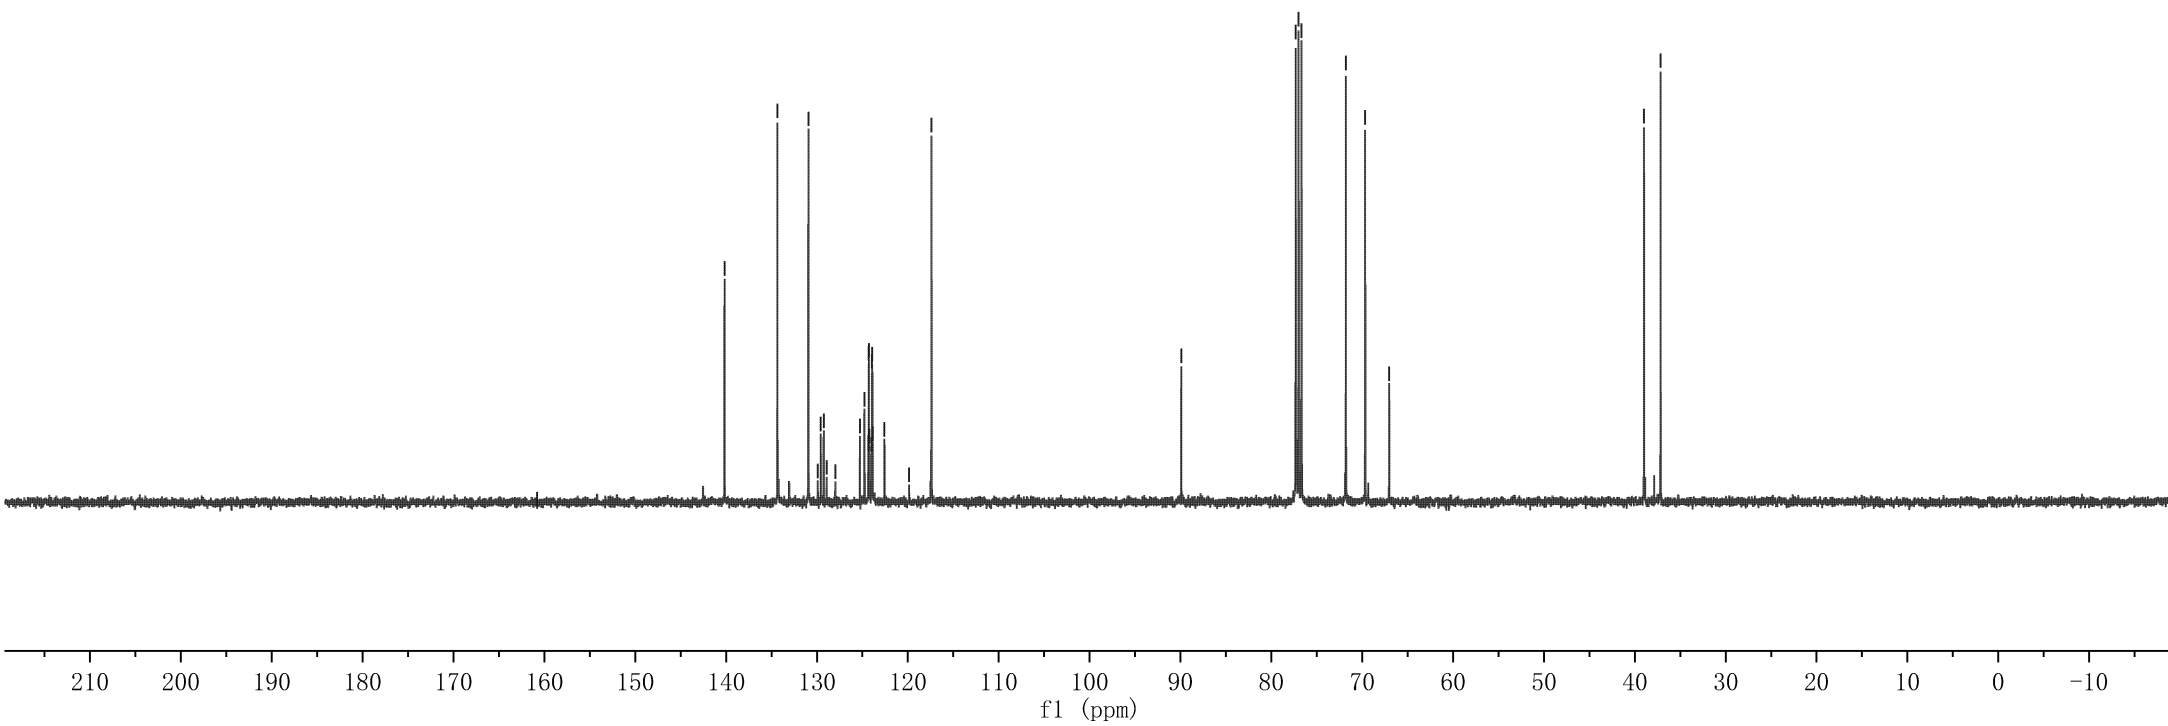

7.281  
7.262  
7.034  
7.016  
6.017  
6.003  
5.990  
5.977  
5.961  
5.947  
5.934  
5.921  
5.343  
5.300  
5.298  
5.182  
4.601  
4.082  
4.069  
3.271  
3.097  
2.335

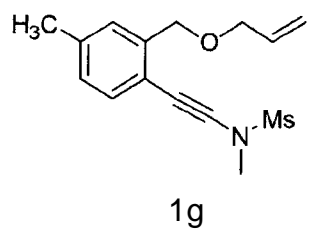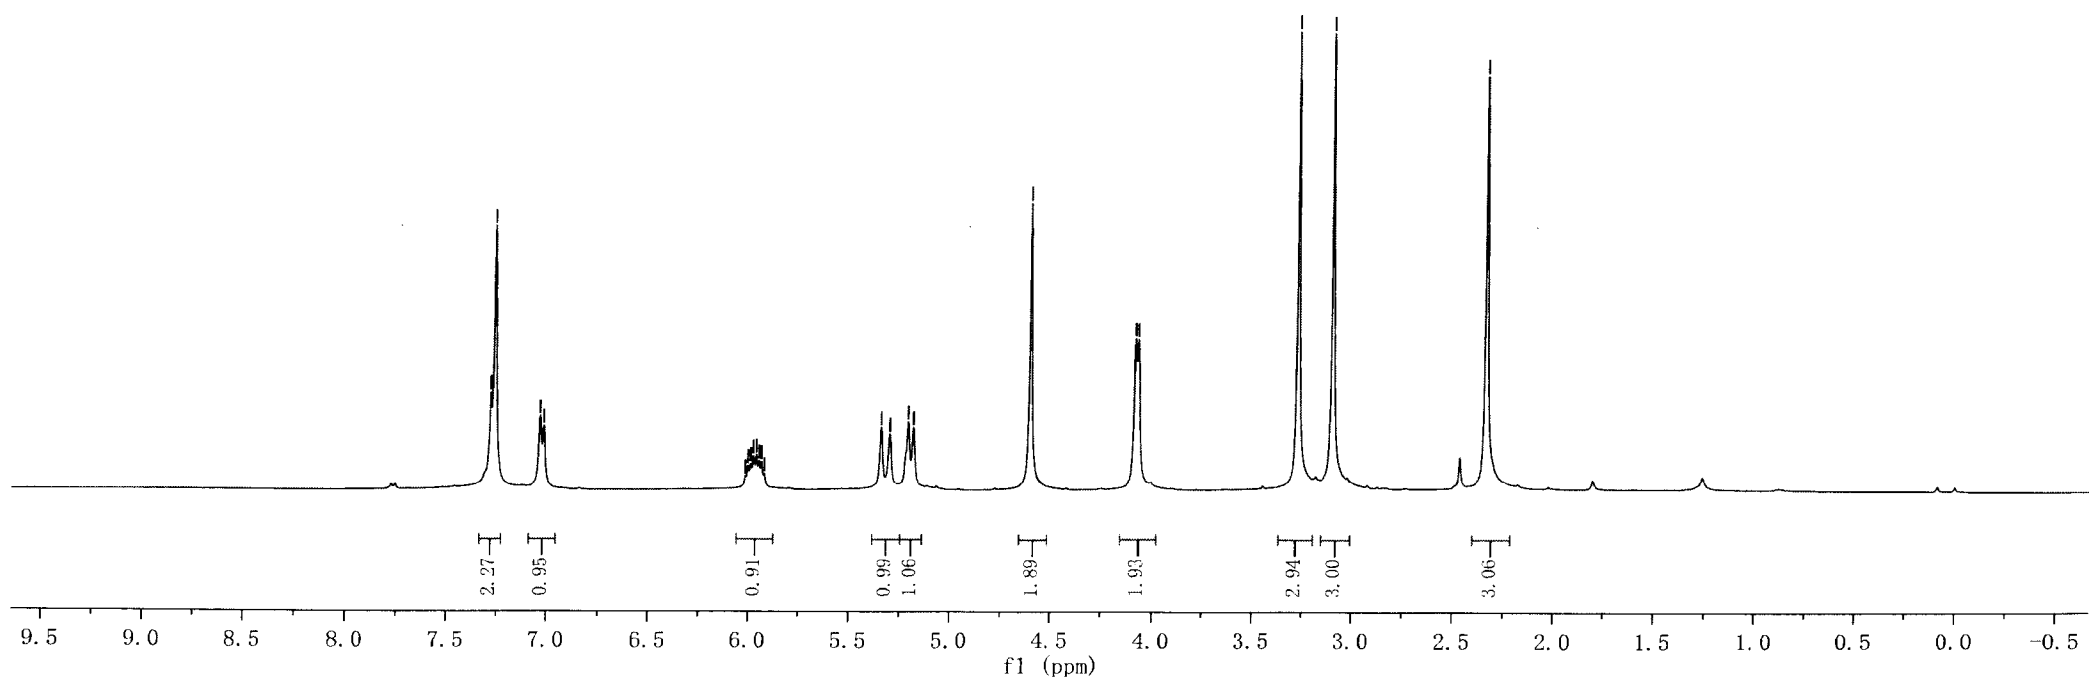

139.40  
138.11  
134.67  
131.36  
128.52  
127.97

118.00  
116.85

86.49

77.32  
77.00  
76.68

71.36  
70.23  
67.29

39.00  
36.50

21.27

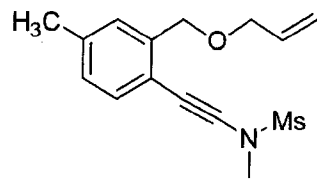

1g

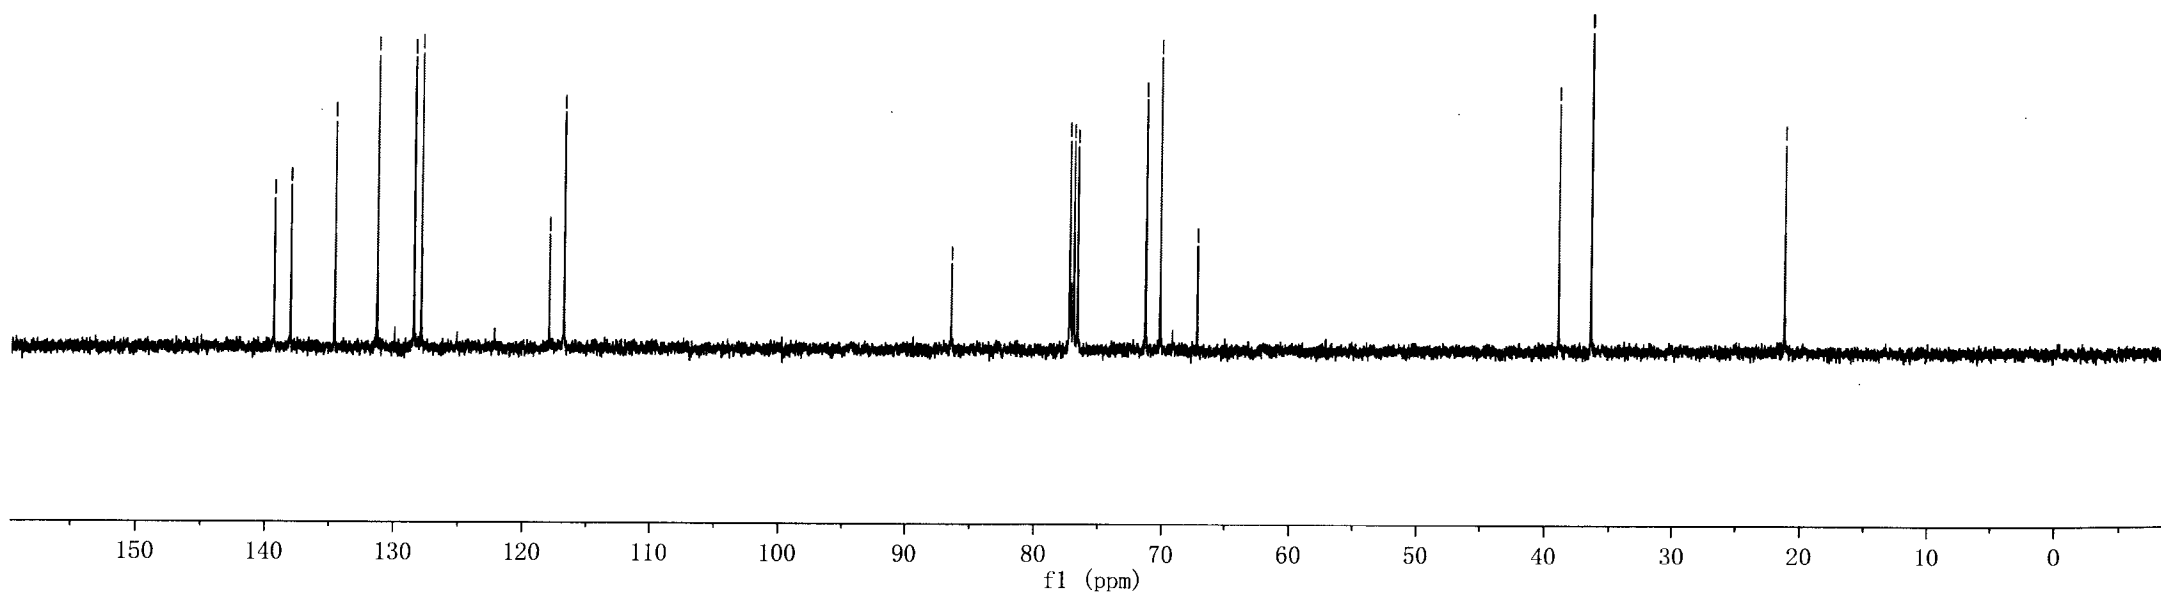

7.330  
7.309  
7.274

7.024

6.768  
6.748

6.017  
5.991  
5.948  
5.922

5.349  
5.306  
5.214  
5.188

4.622

4.088  
4.076

3.803

3.270  
3.099

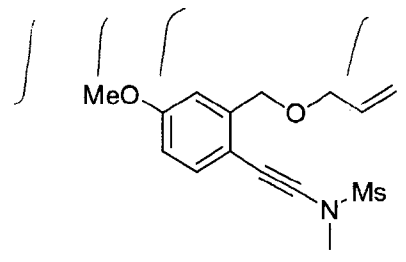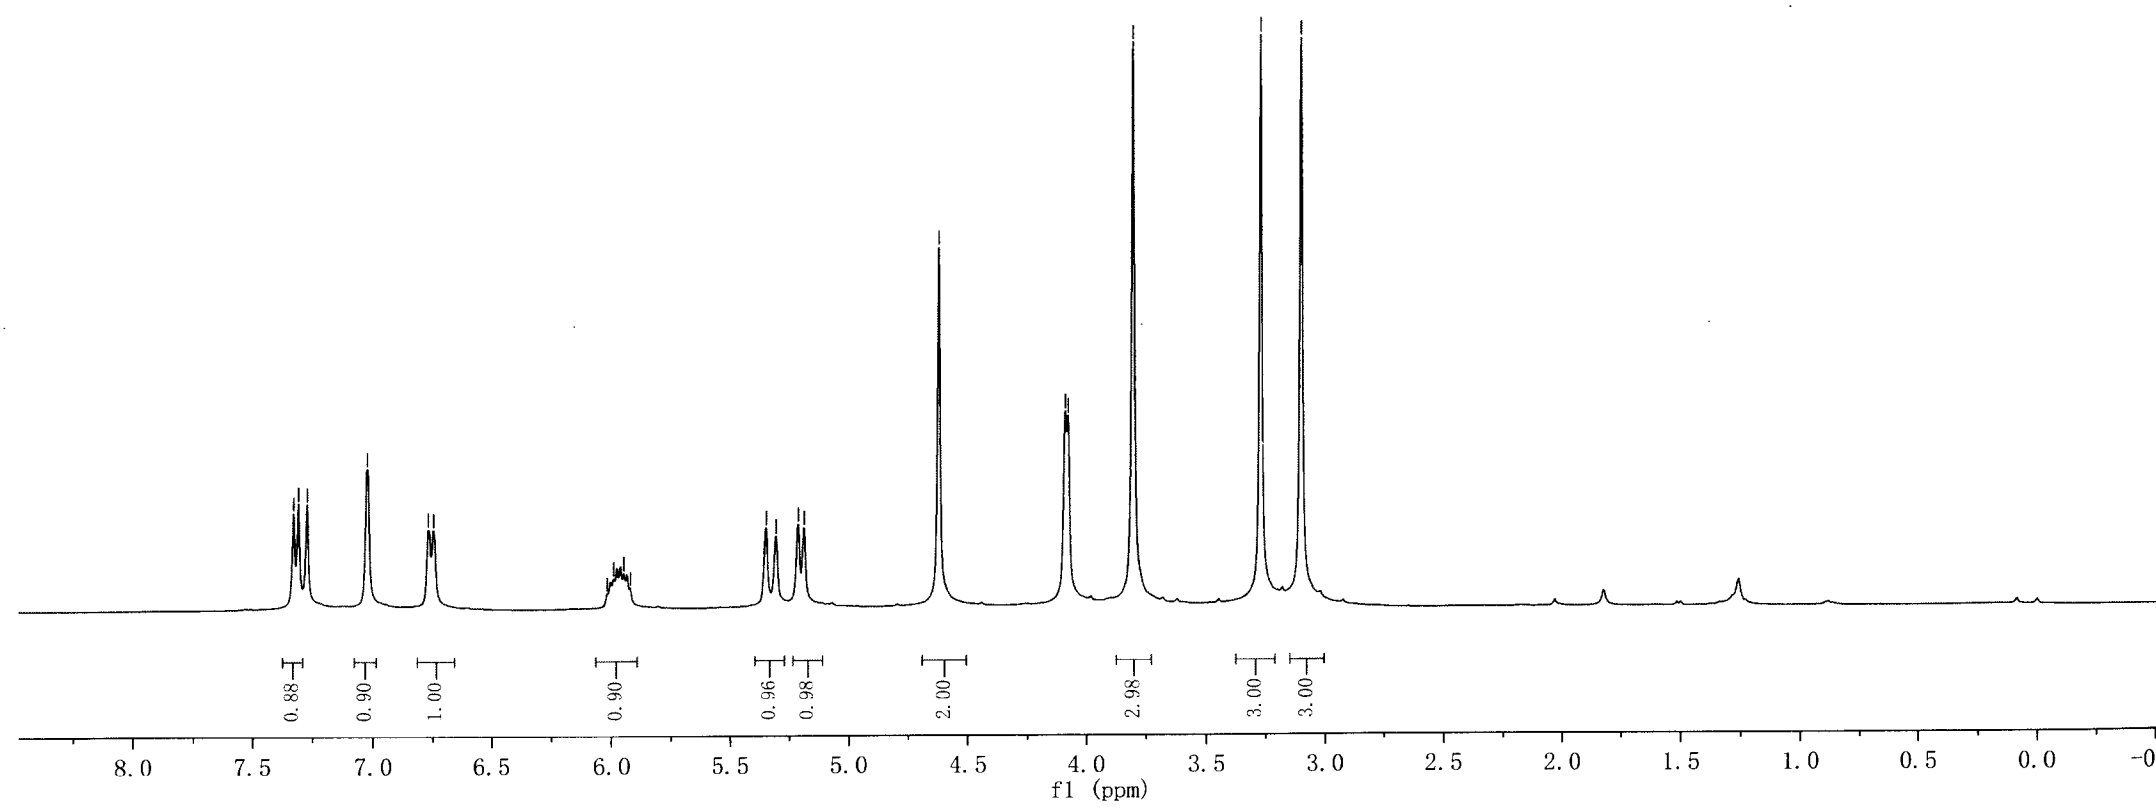

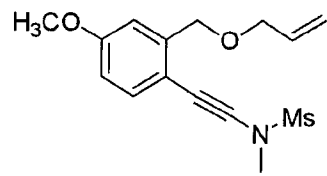

1h

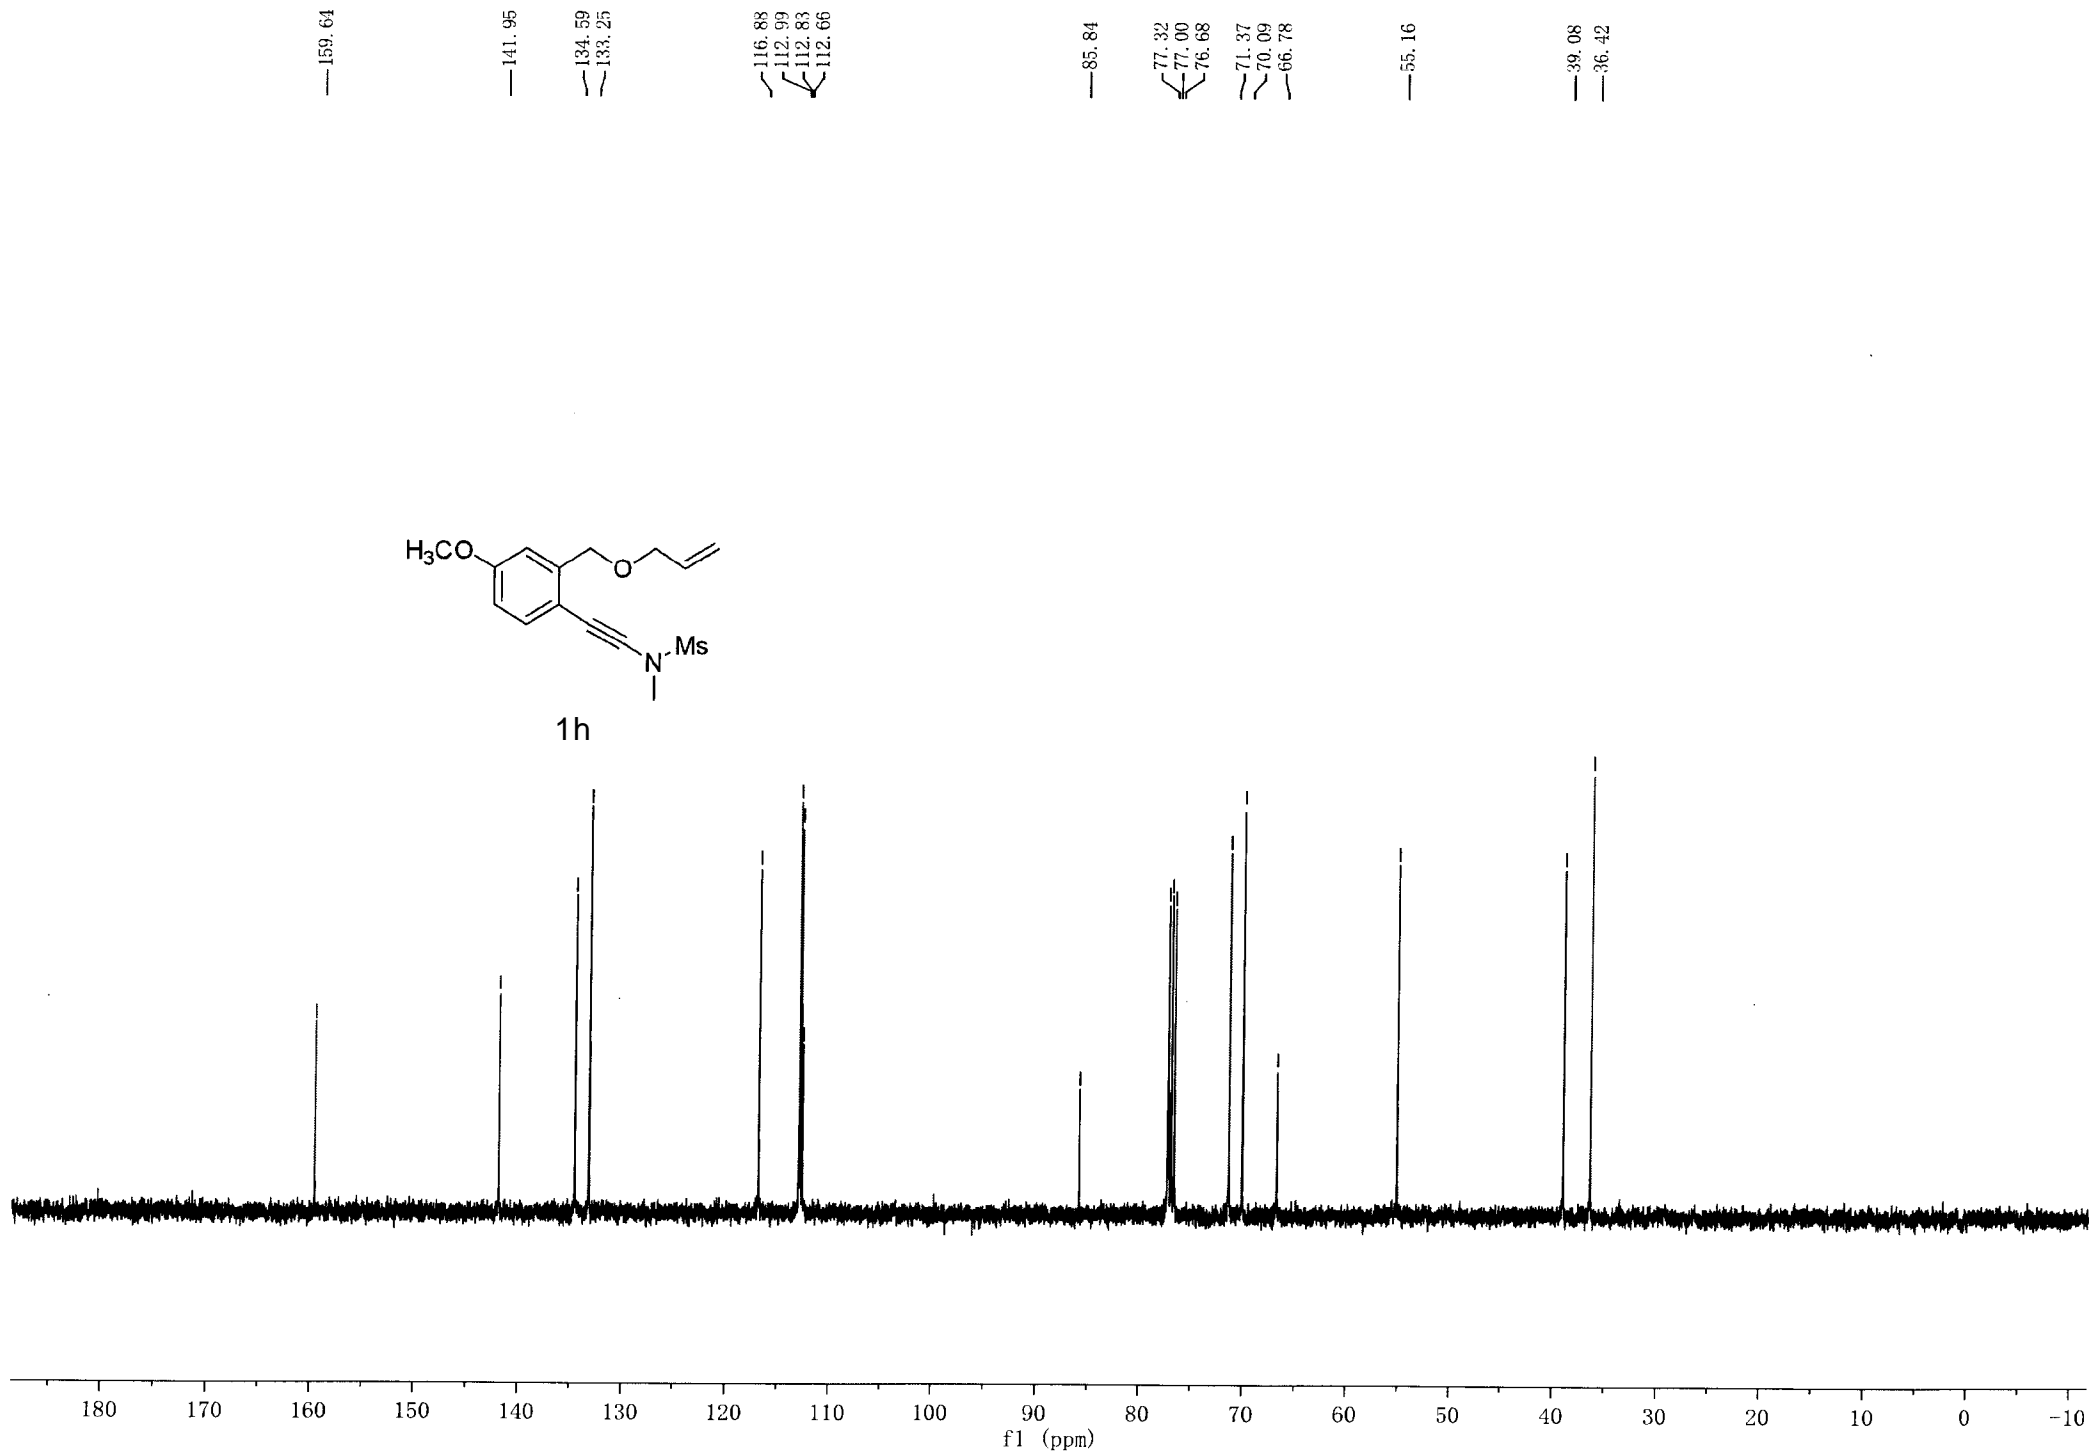

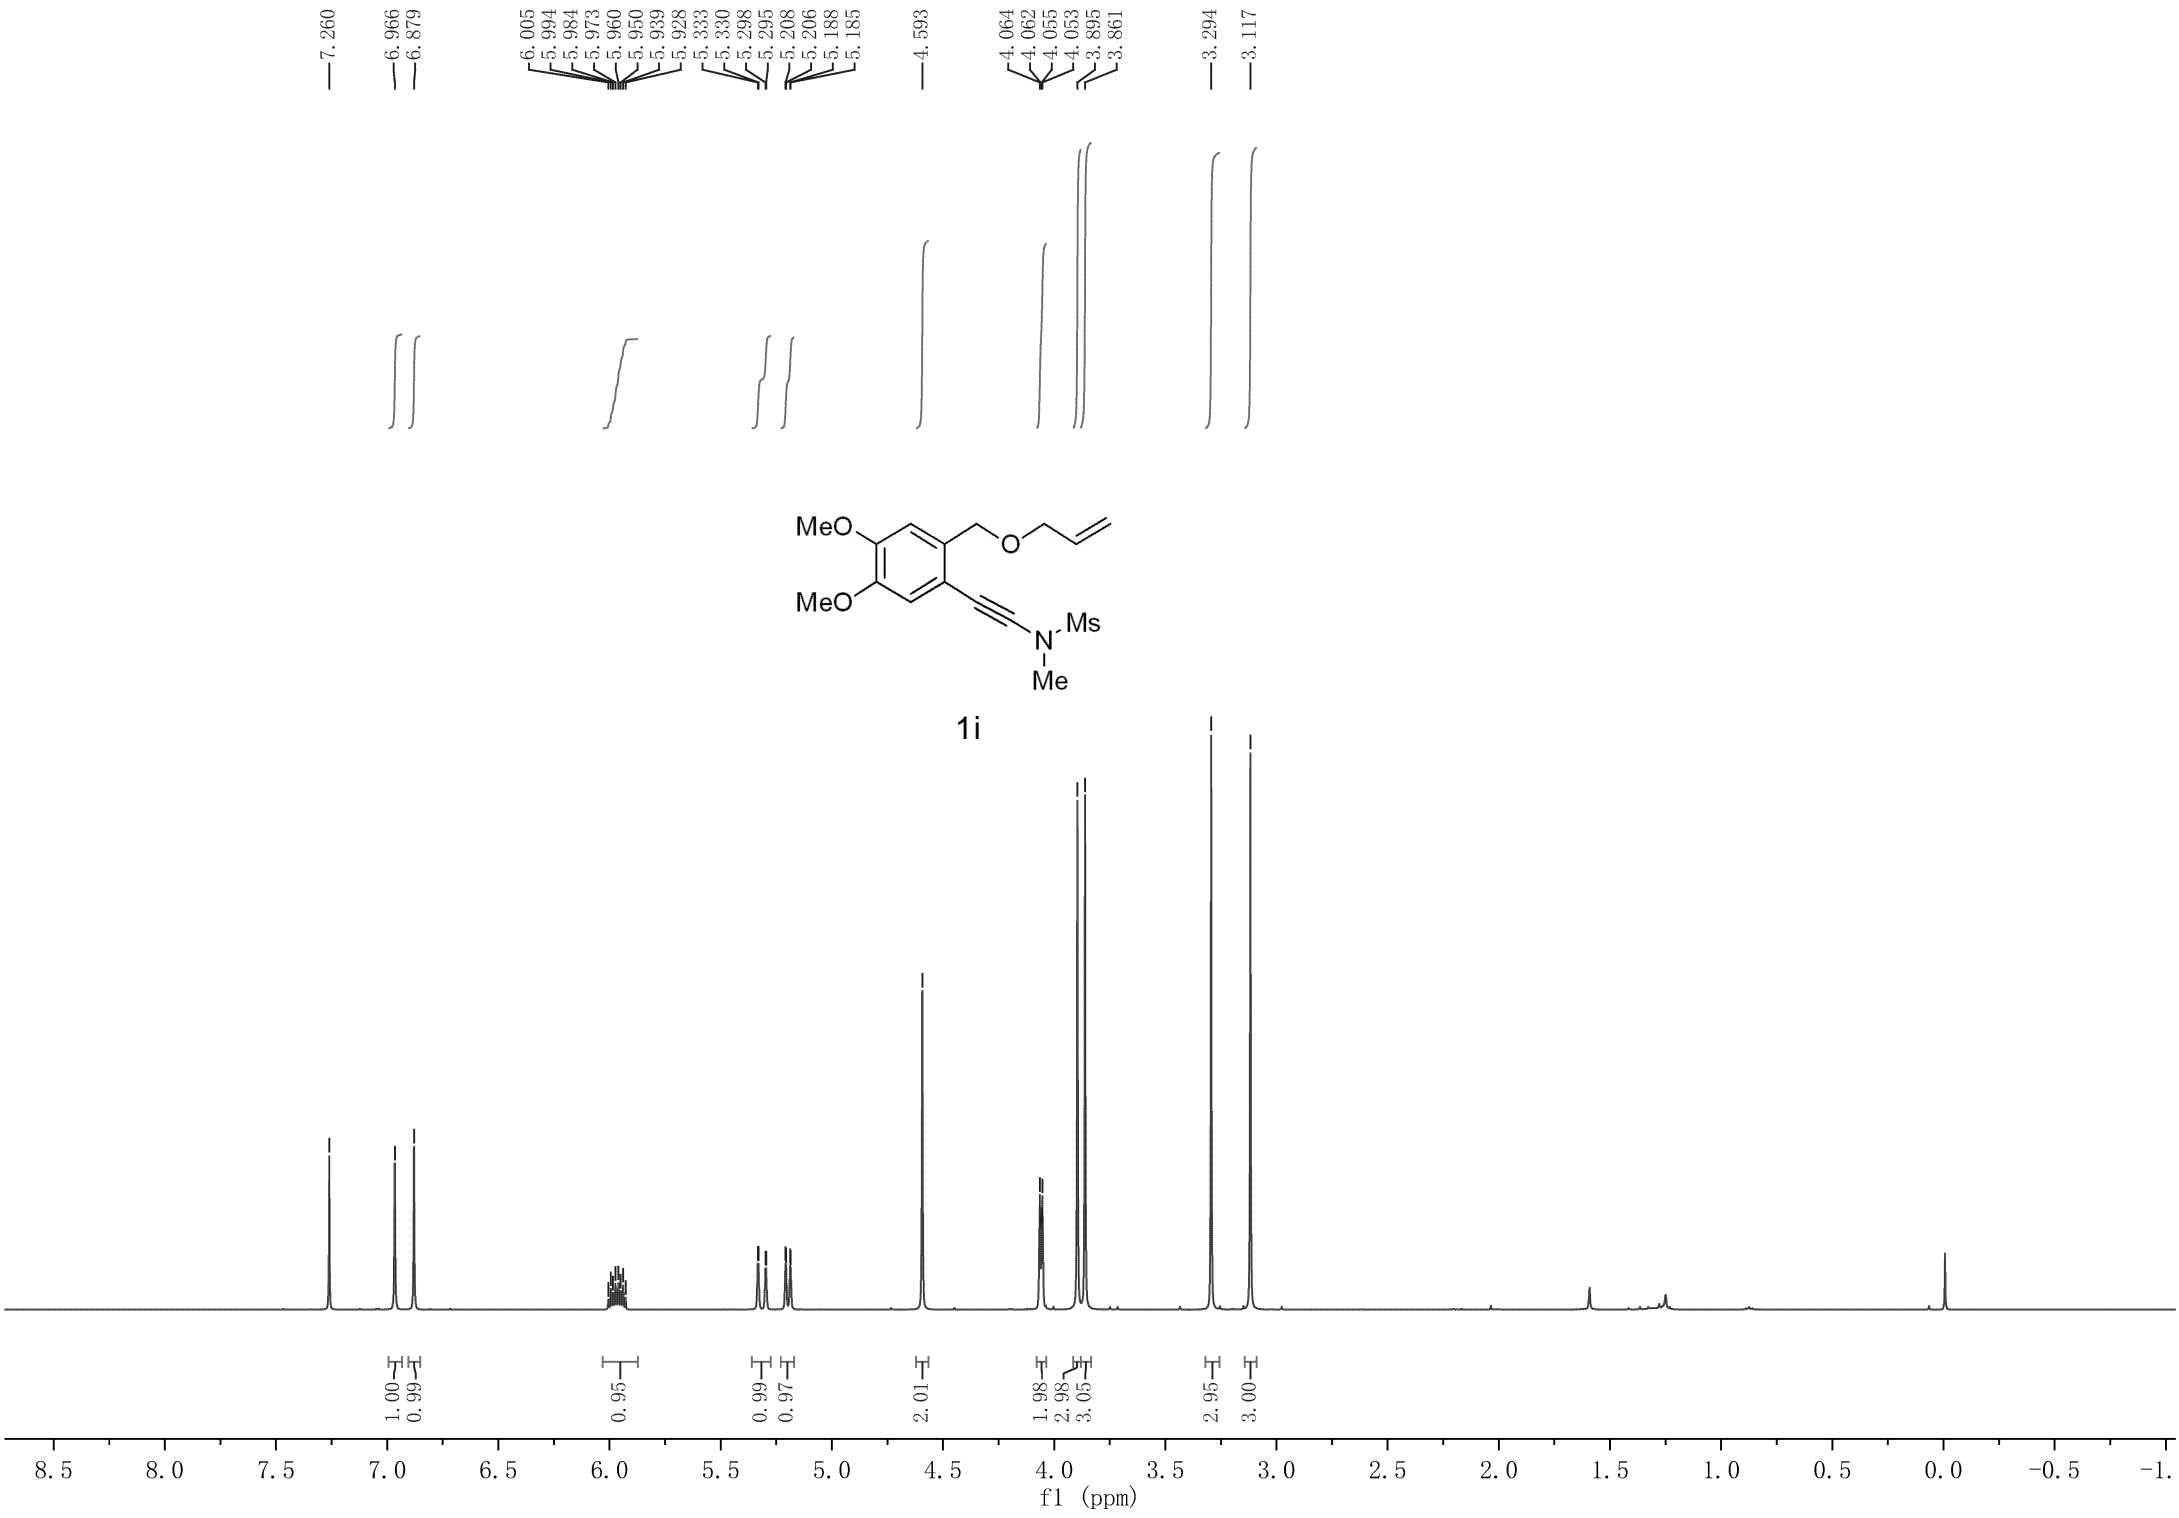

149.42  
147.97

134.81  
133.55

117.05  
114.39  
113.07  
111.08

85.69

77.25  
77.00  
76.75  
71.32  
70.11  
67.30

56.01  
55.90

39.19  
36.73

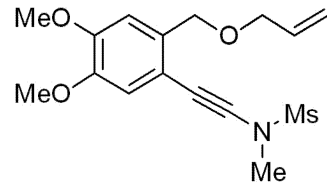

1i

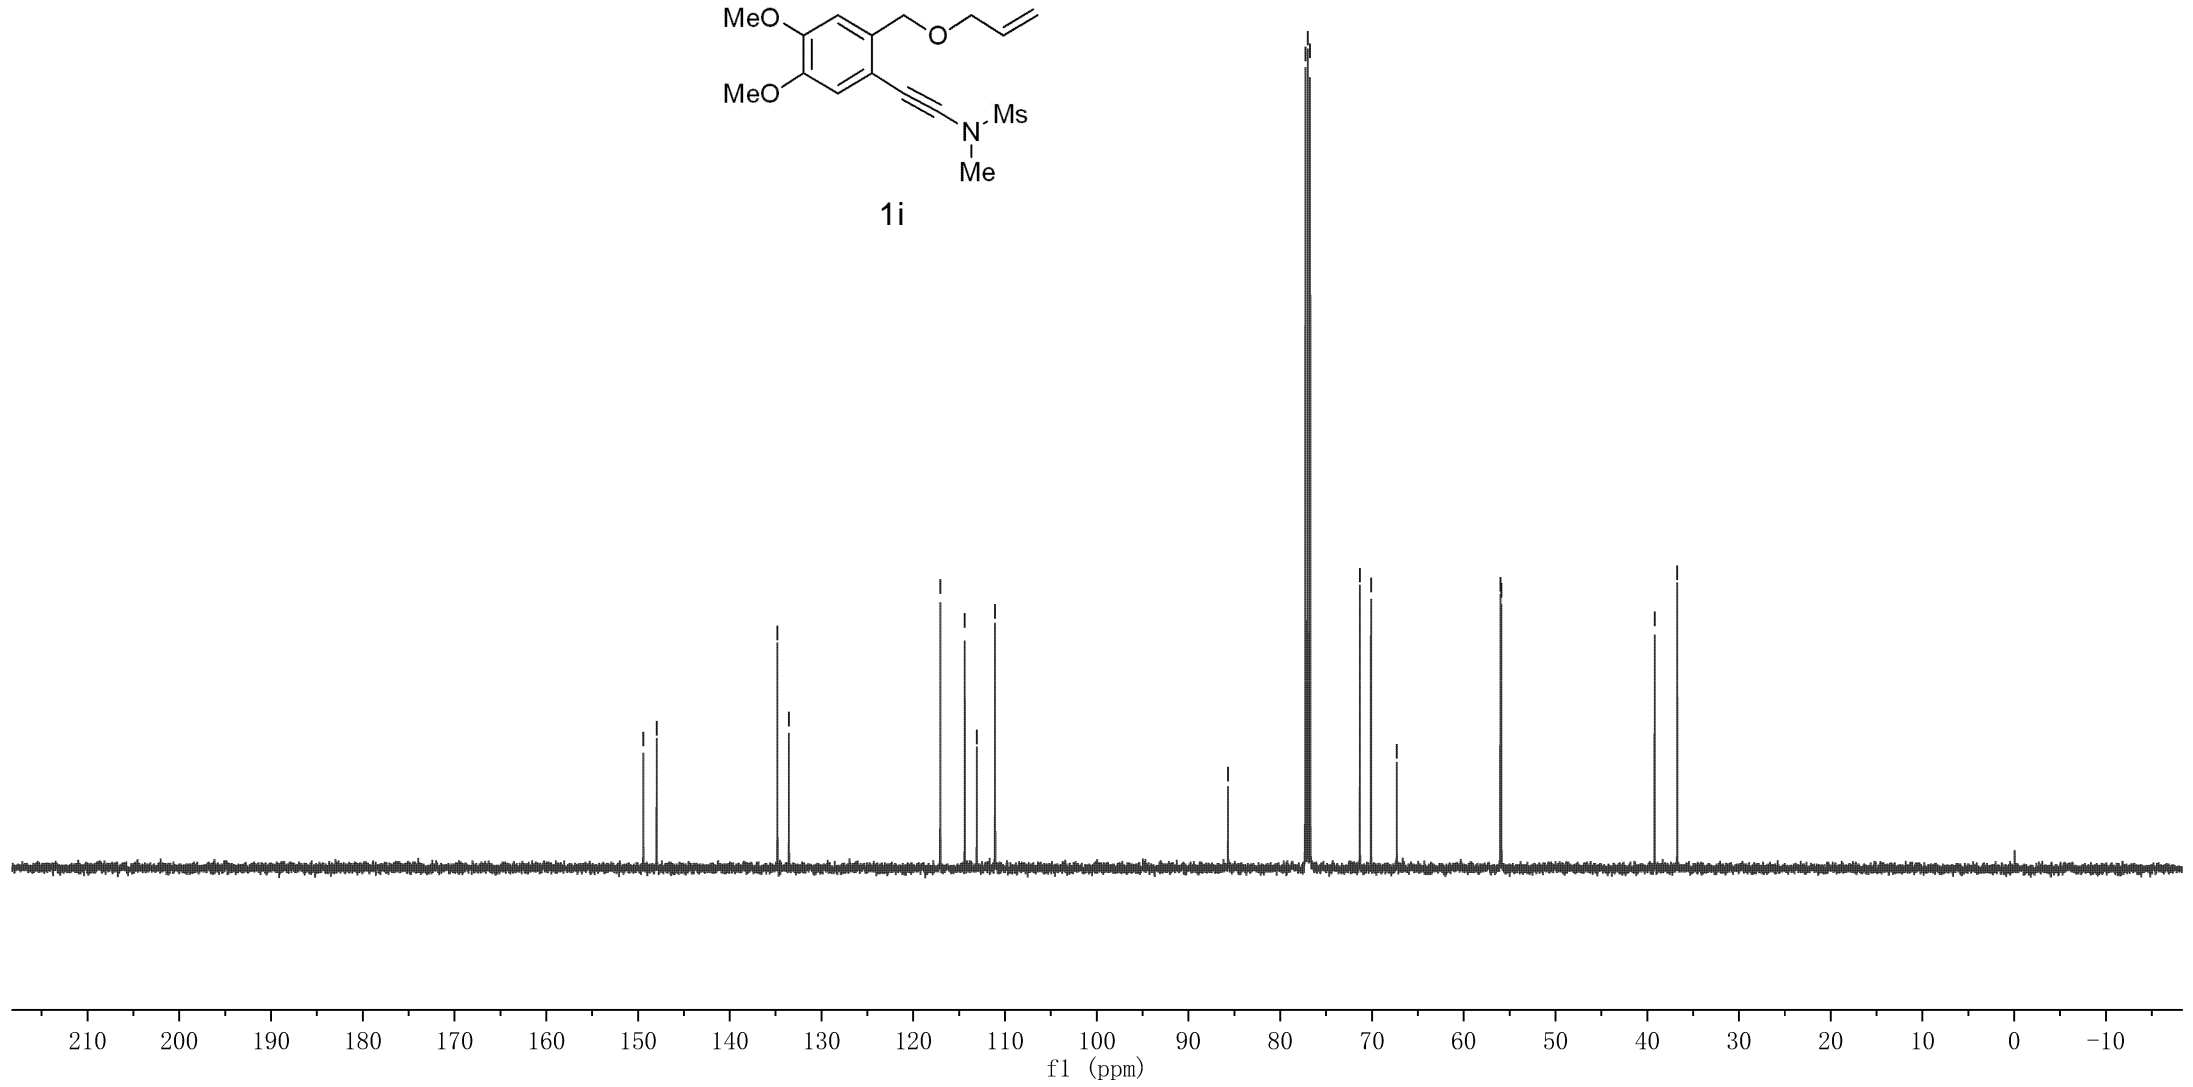

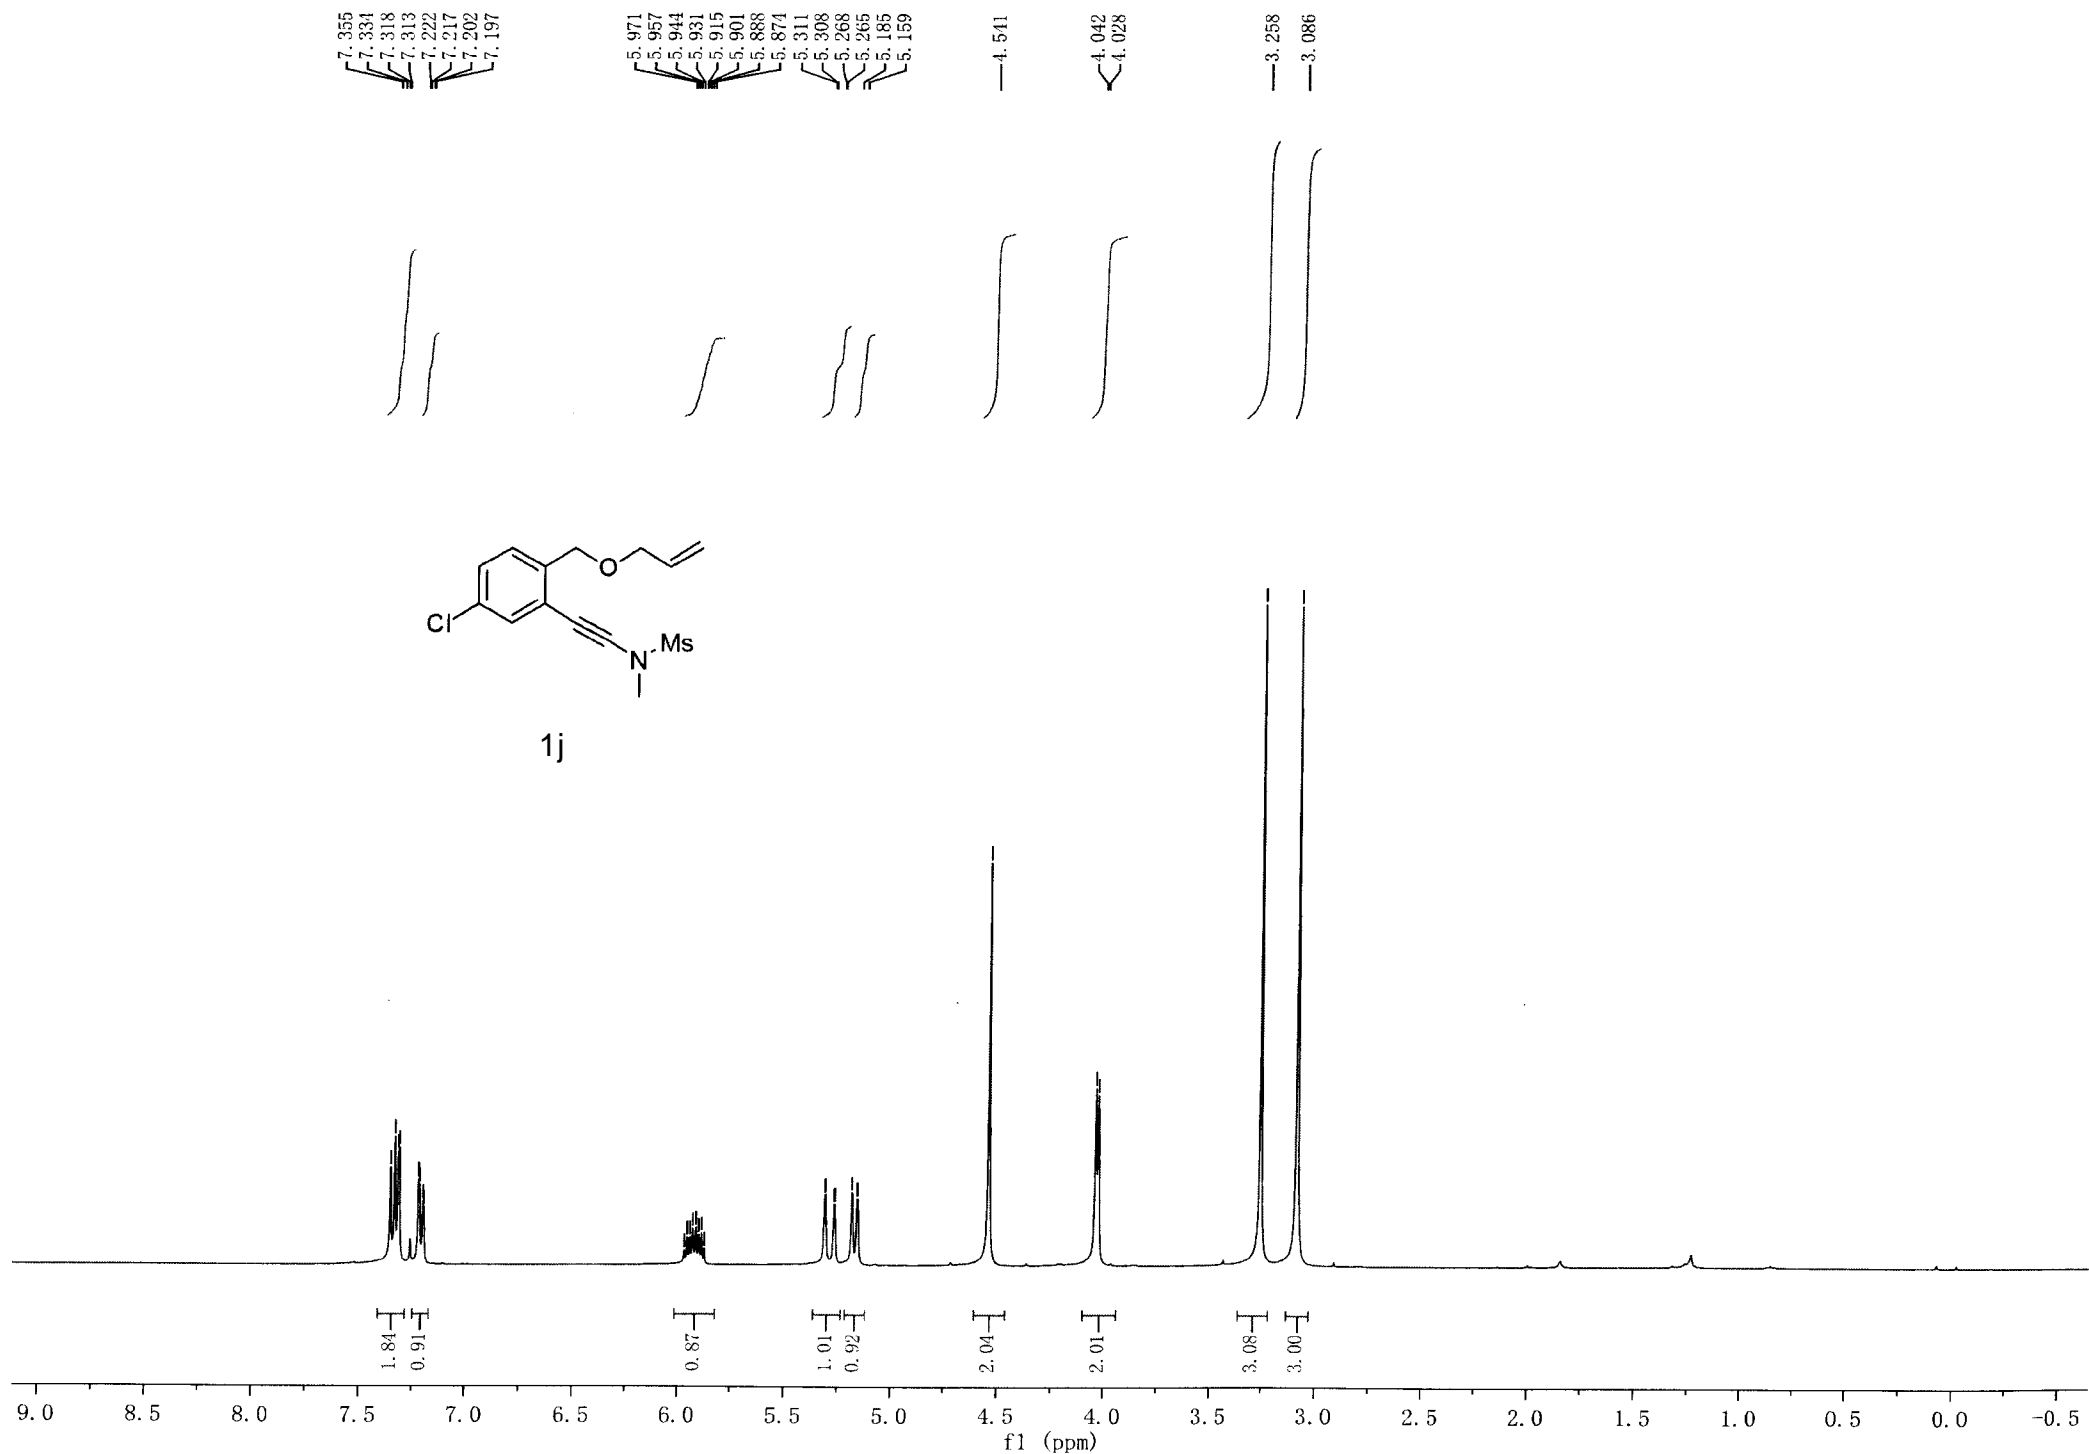



137.79  
134.39  
132.59  
130.41  
128.92  
127.73  
122.72  
116.91

88.44

77.32  
77.00  
76.68

71.30  
69.46  
66.40

38.83  
36.79

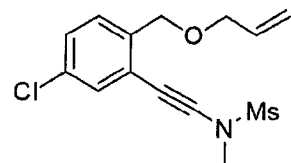

1j

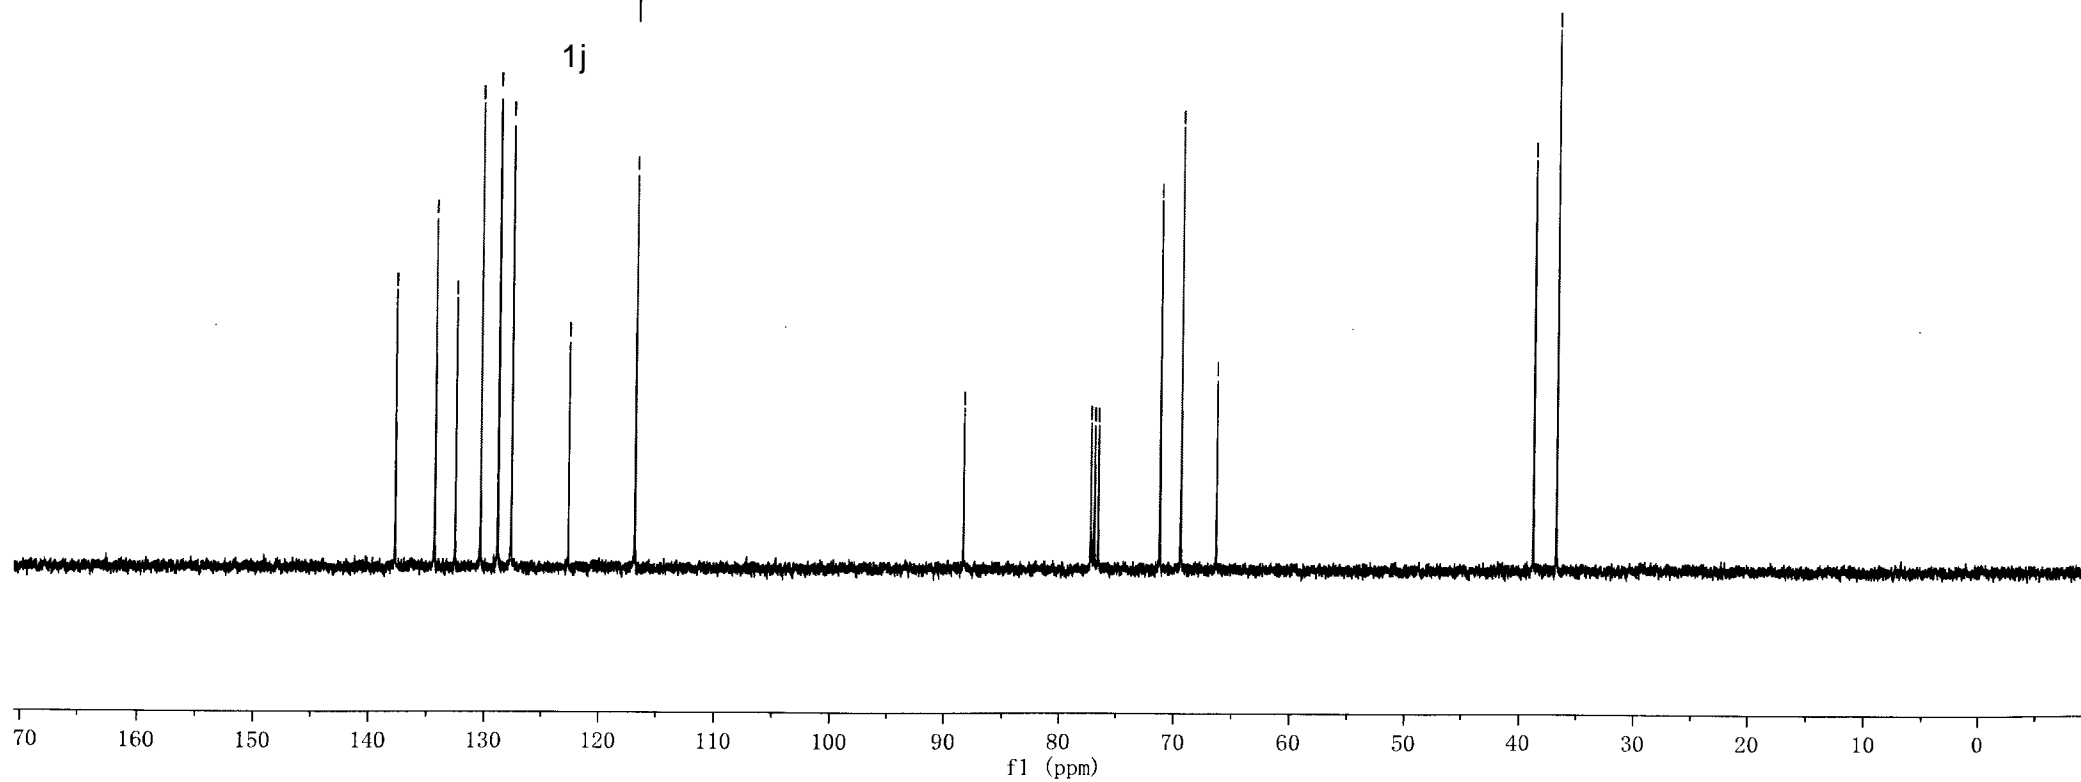

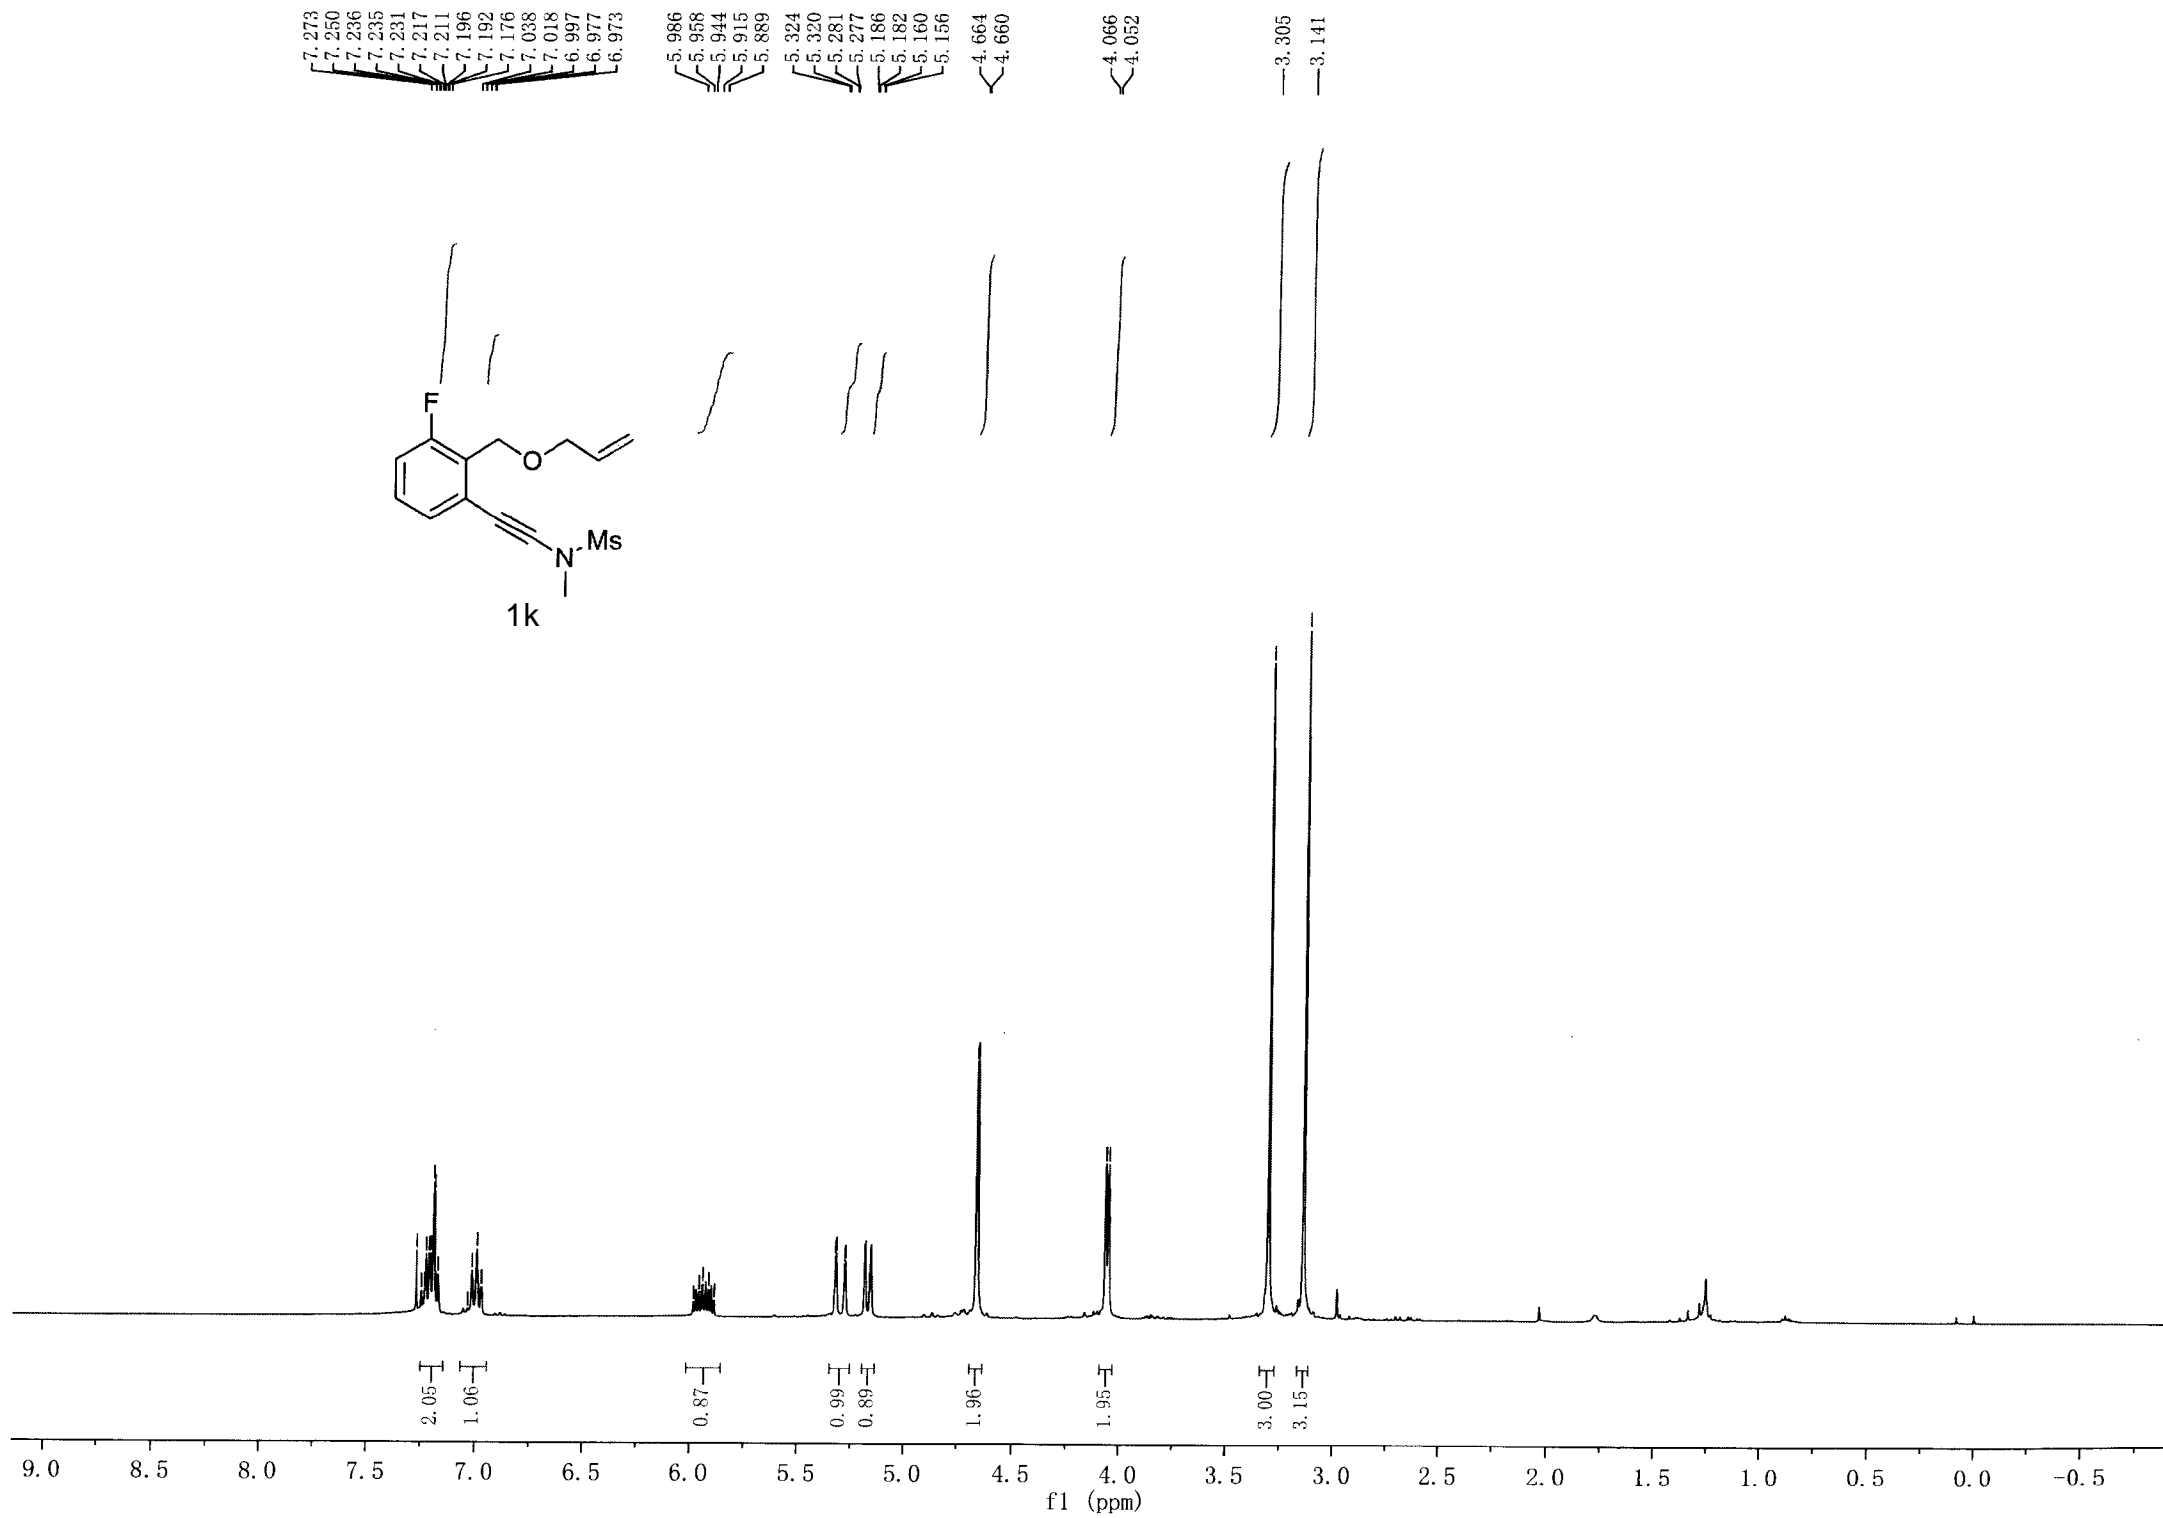

—162.71  
—160.25

—134.71  
129.56  
129.47  
127.08  
127.05  
125.65  
125.60  
125.54  
115.16  
114.93

—87.48

77.32  
77.00  
76.68

—71.34

—67.43

—63.64

—38.90  
—36.97

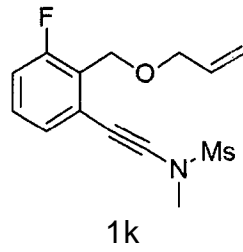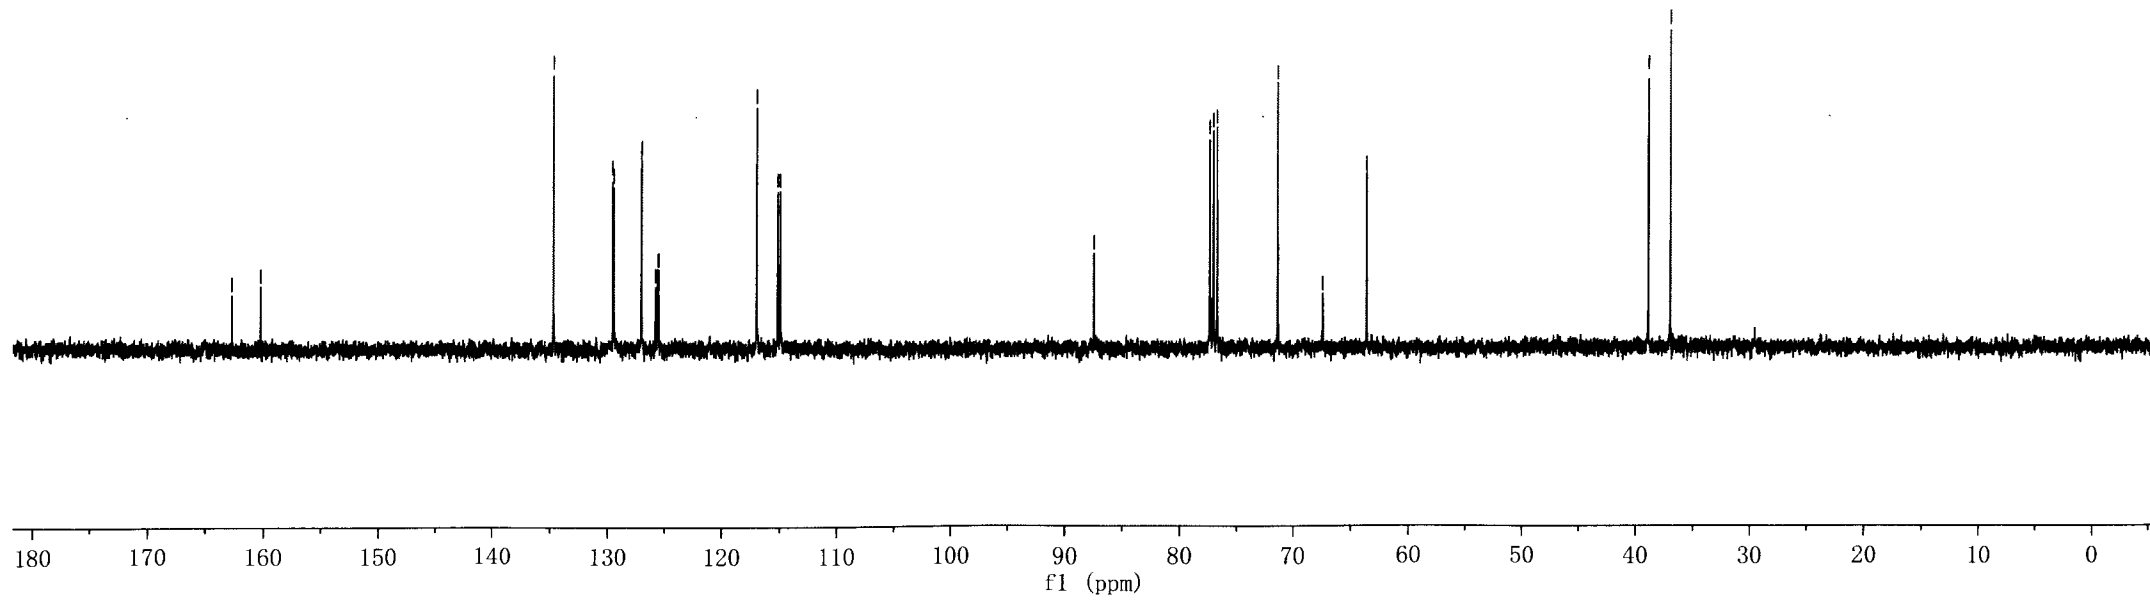

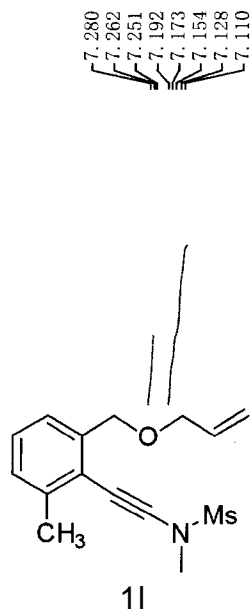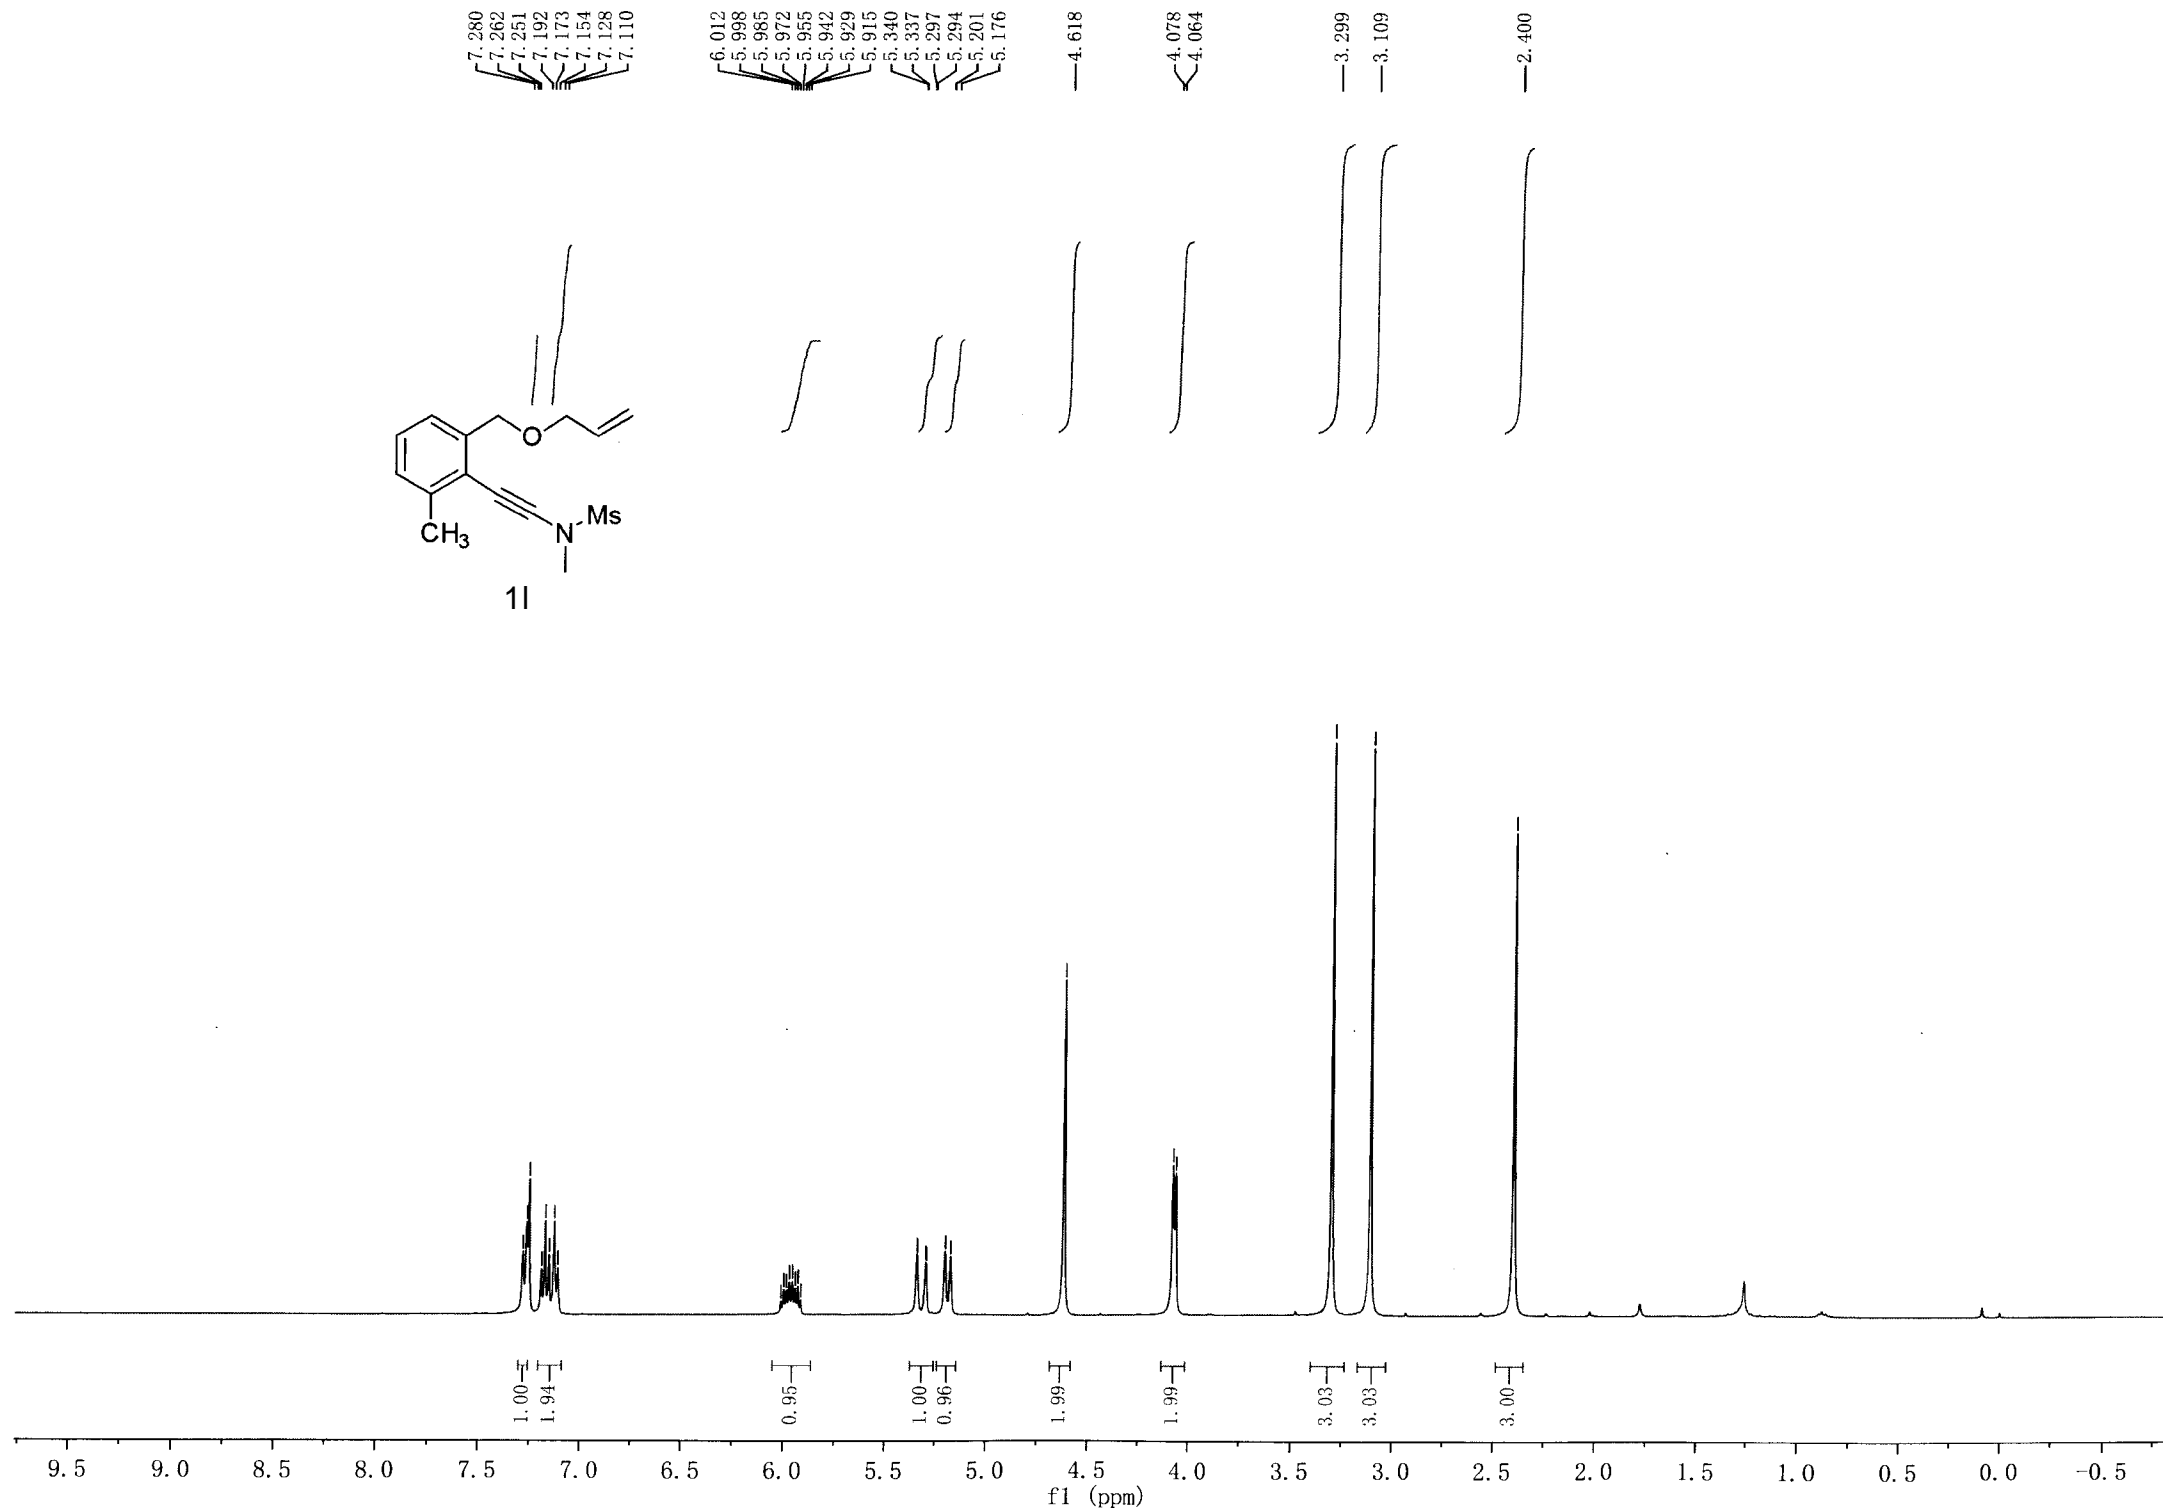

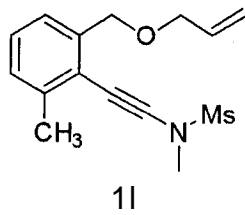

139.34  
139.13  
134.73  
128.36  
127.27  
125.08  
121.00  
116.78

91.64

77.32  
77.00  
76.68  
71.33  
70.62  
66.36

39.13  
36.56

20.66

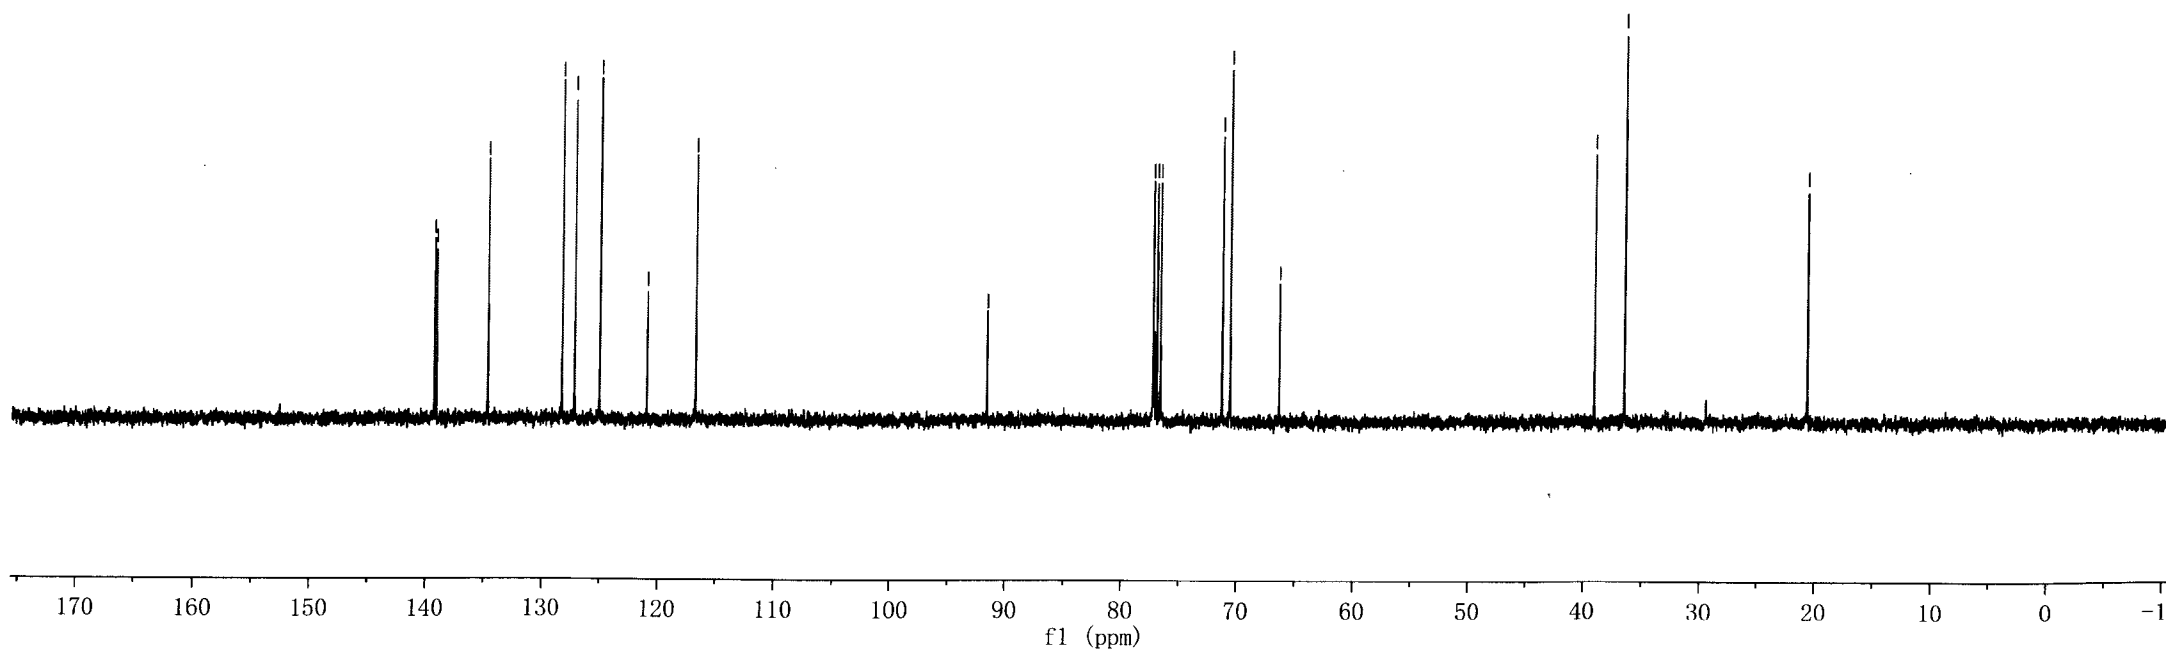

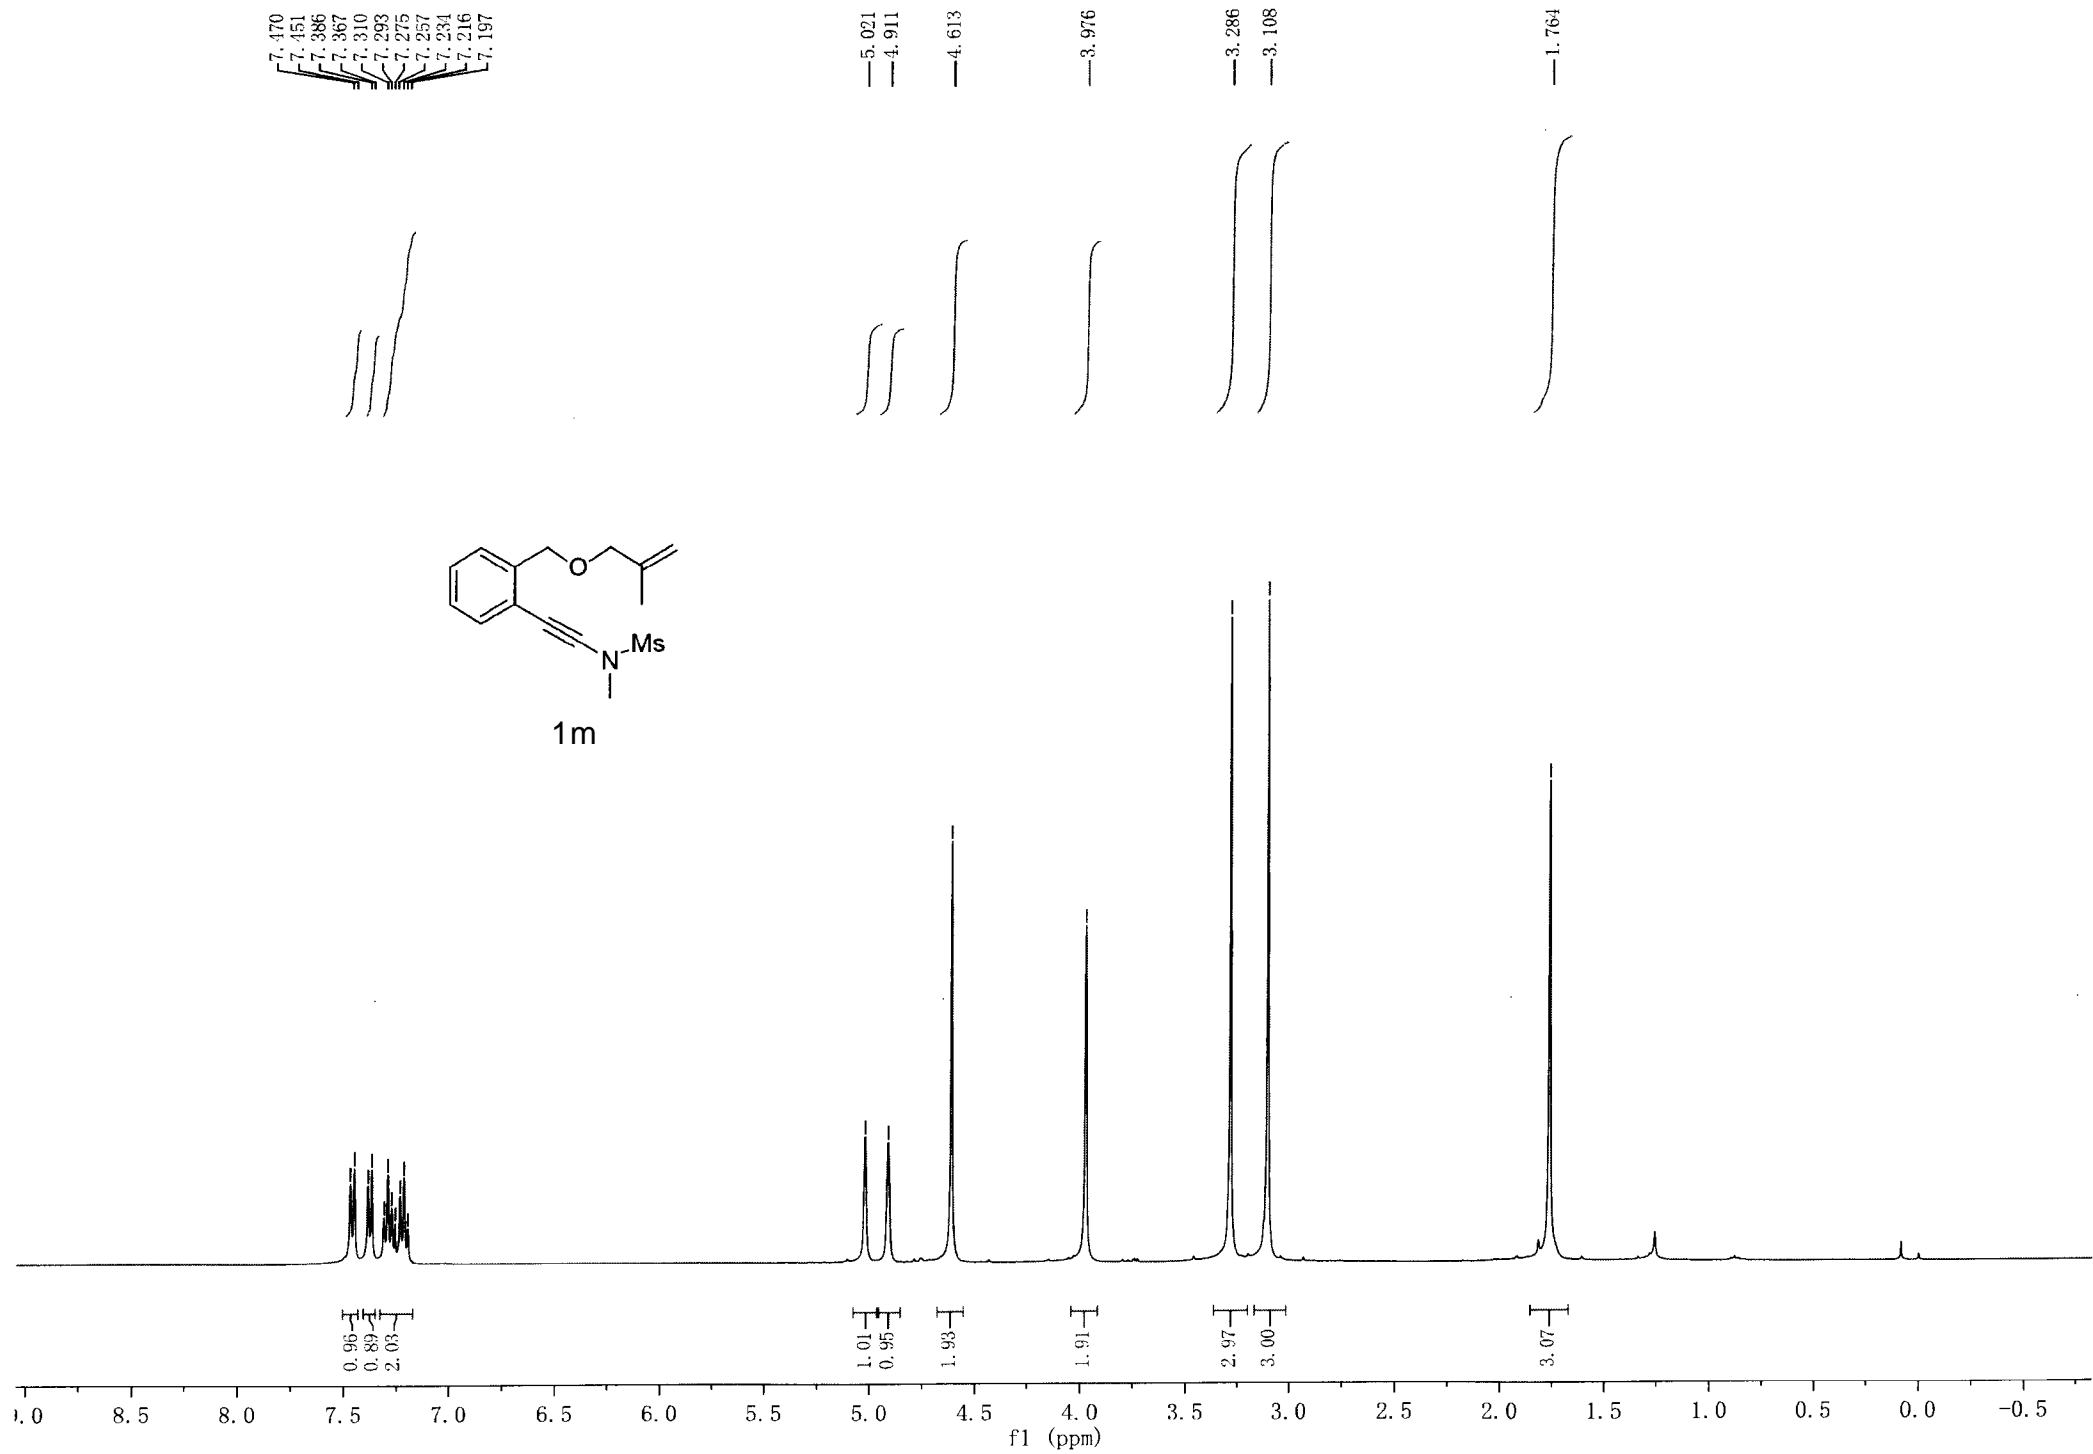

—142.06  
—139.59  
—131.21  
—127.87  
—127.59  
—127.10  
—120.97  
—111.95

—87.29  
—77.32  
—77.00  
—76.68  
—74.24  
—69.97  
—67.33

—38.96  
—36.57

—19.37

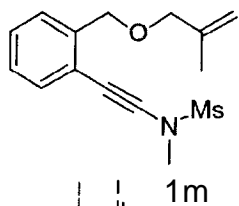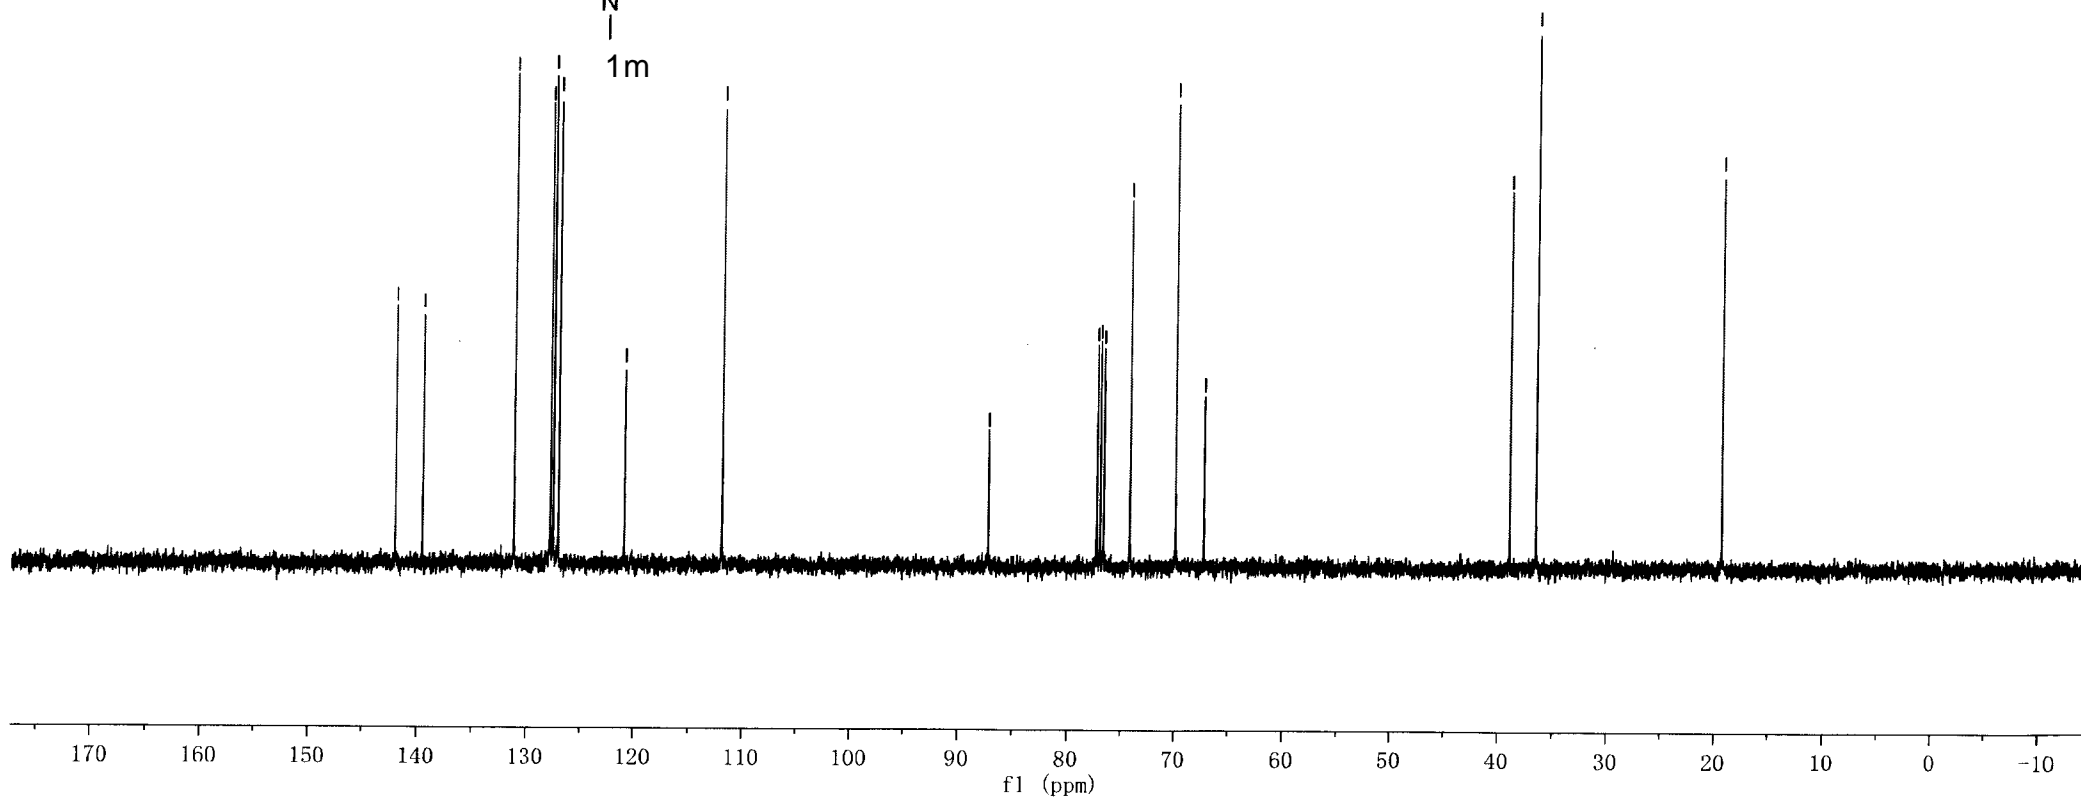

7.475  
7.457  
7.424  
7.404  
7.394  
7.374  
7.340  
7.323  
7.304  
7.281  
7.249  
7.226  
7.210

5.544  
5.392

4.696  
4.446

3.249  
3.045

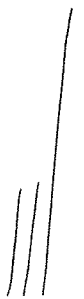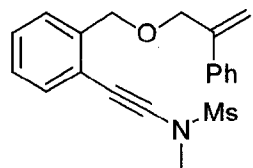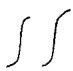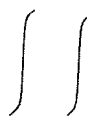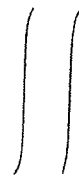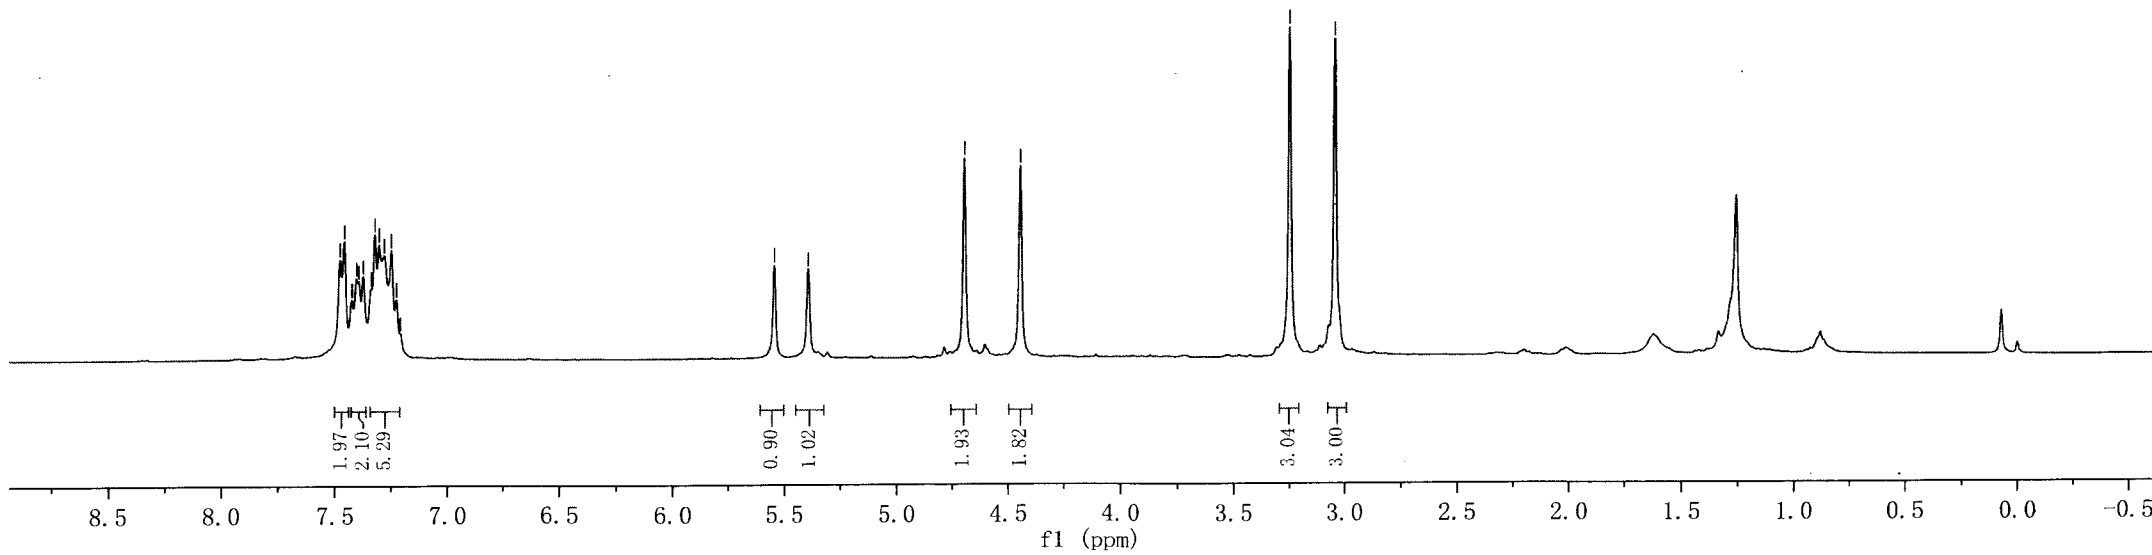



144.23  
139.44  
138.81  
131.34  
128.31  
128.11  
127.98  
127.73  
127.37  
126.09  
121.39

114.43

87.44

77.32  
77.00  
76.68

72.32  
70.35  
67.65

39.05  
36.76

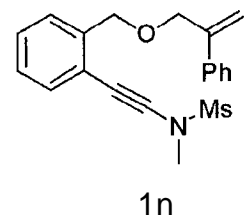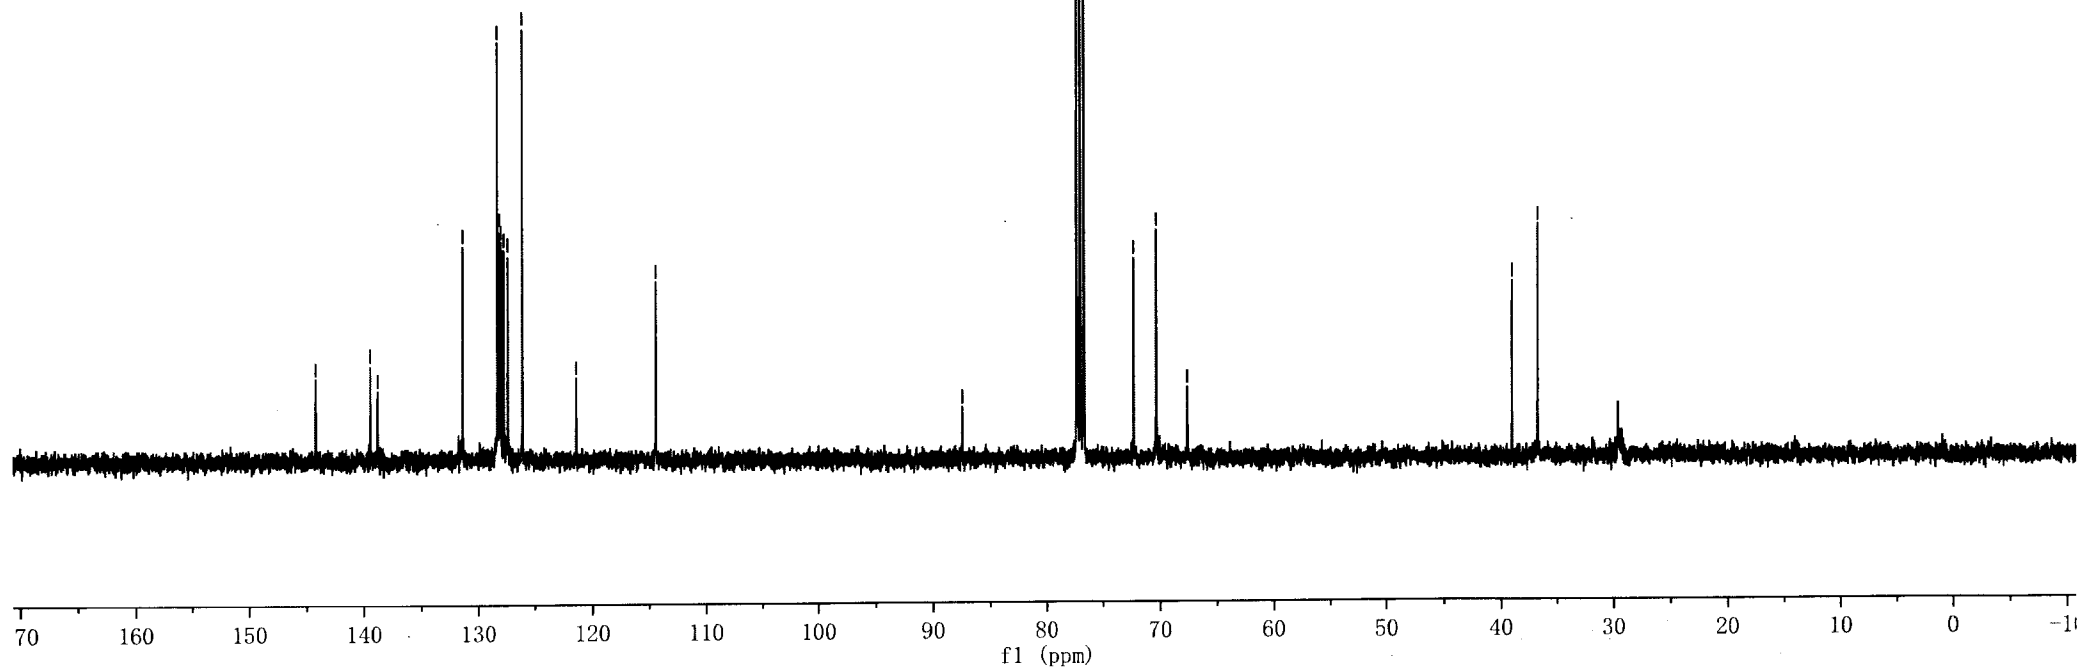

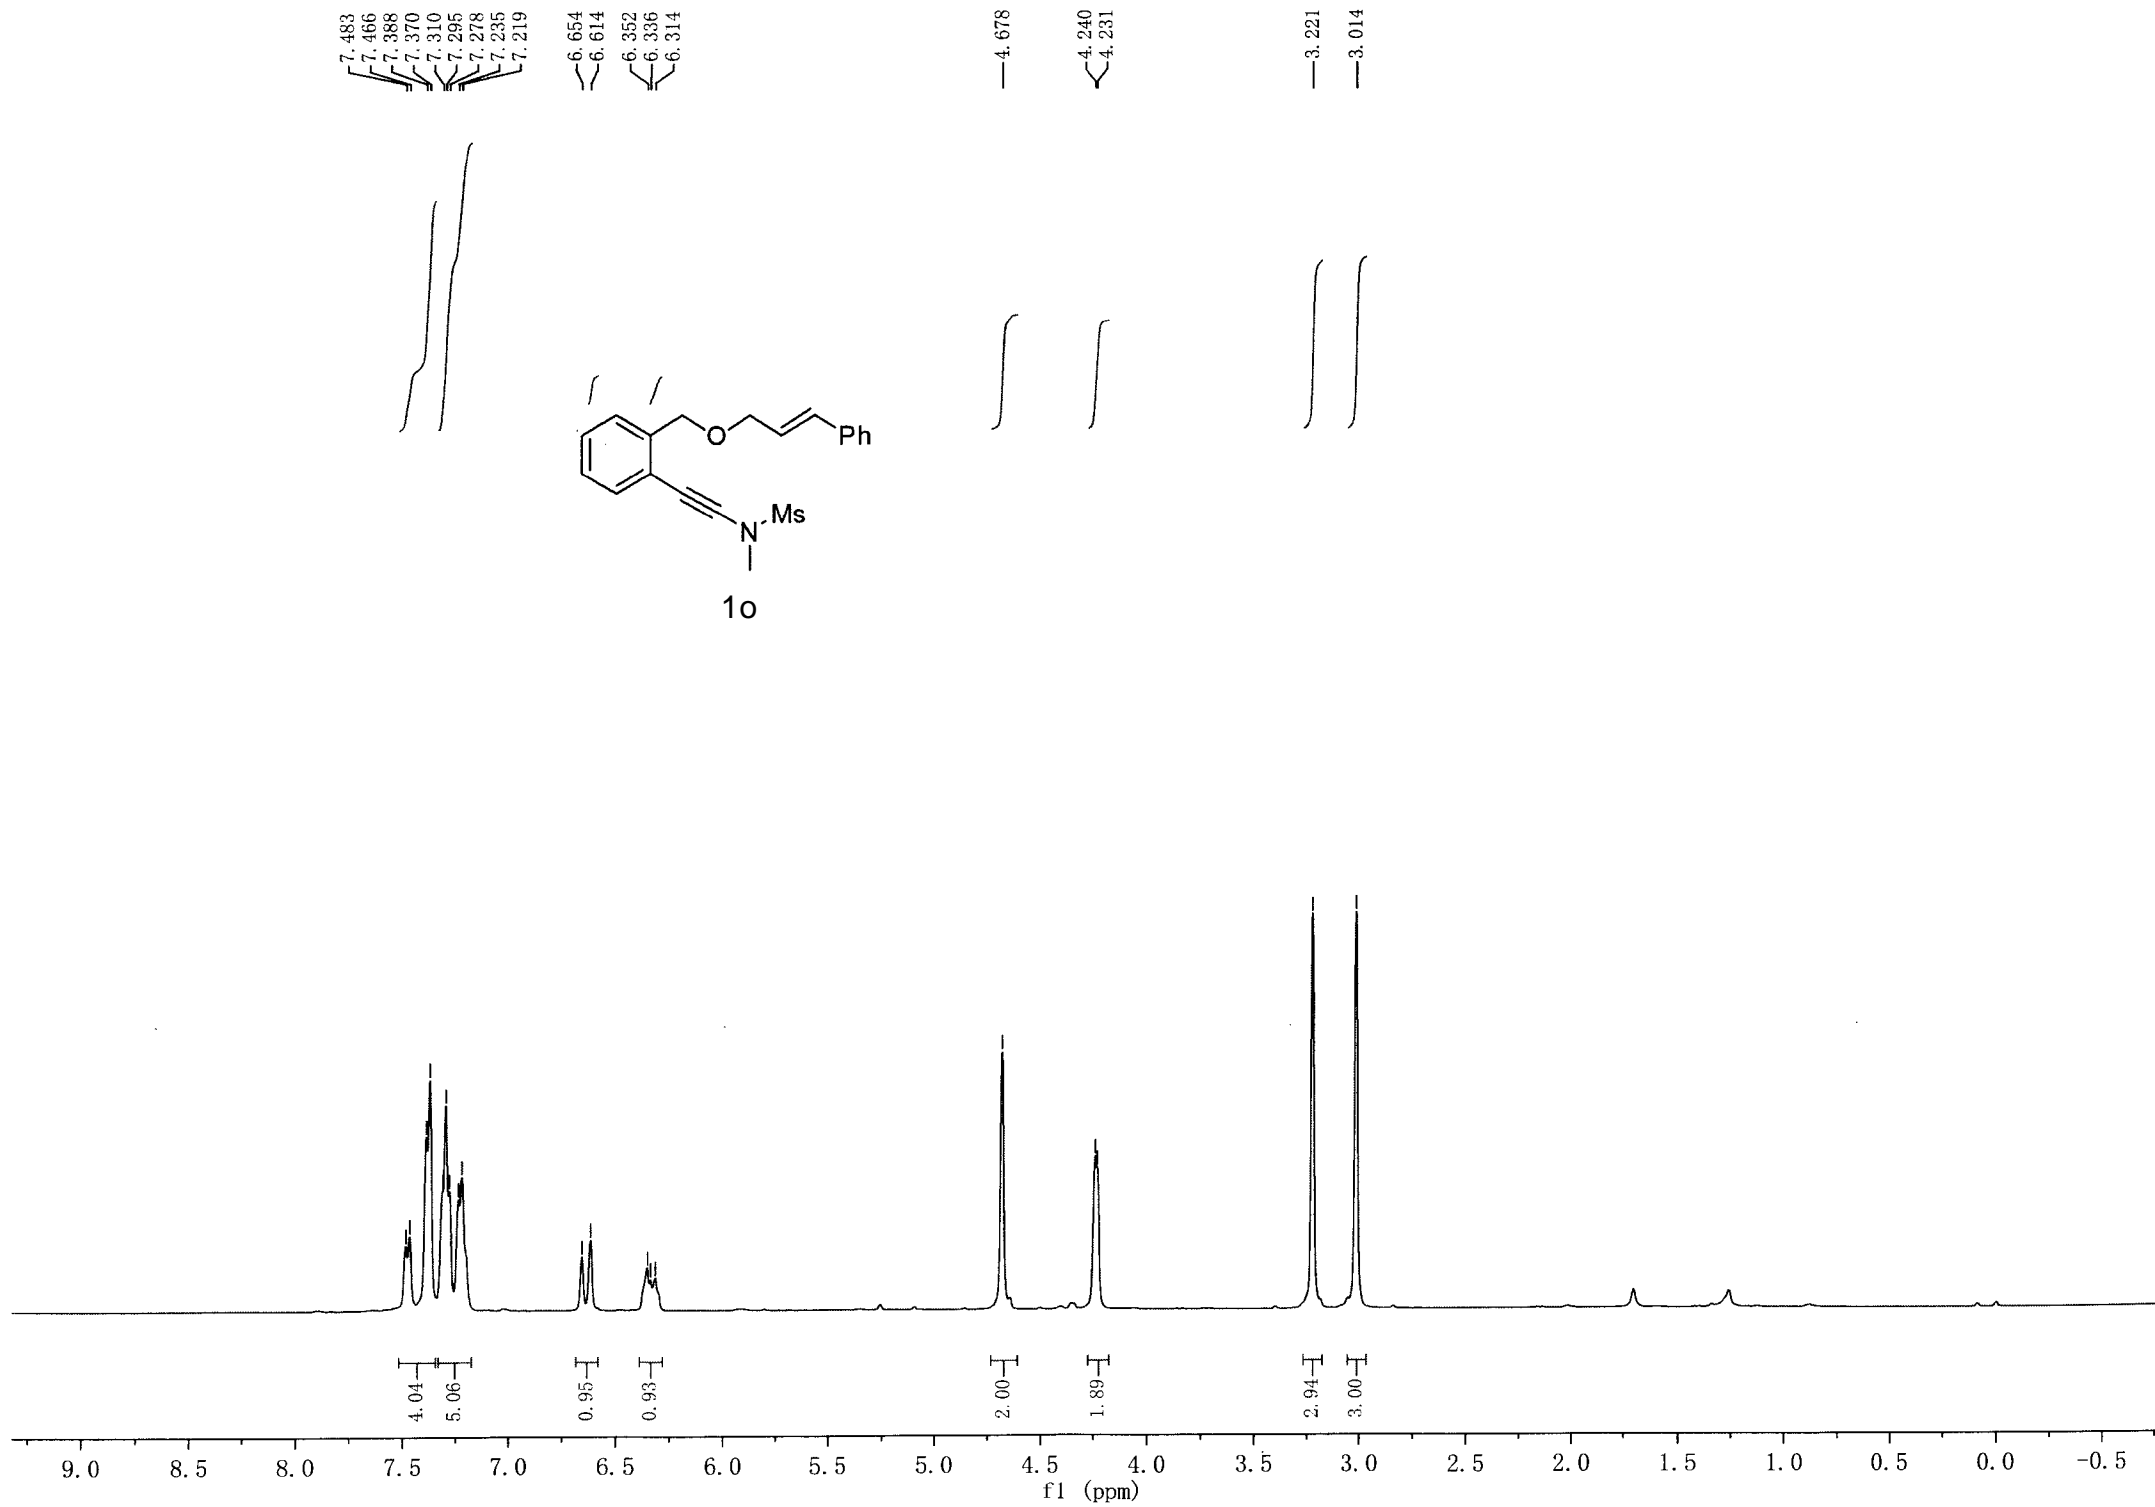

— 139.43  
— 136.58  
— 132.44  
— 131.29  
— 128.46  
— 127.95  
— 127.90  
— 126.36  
— 125.99  
— 125.91

— 87.36

— 77.32  
— 77.00  
— 76.68

— 70.96  
— 70.18  
— 67.47

— 38.97  
— 36.58

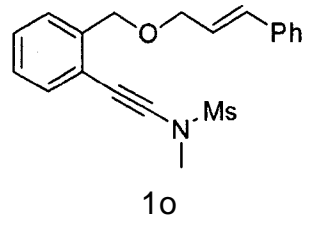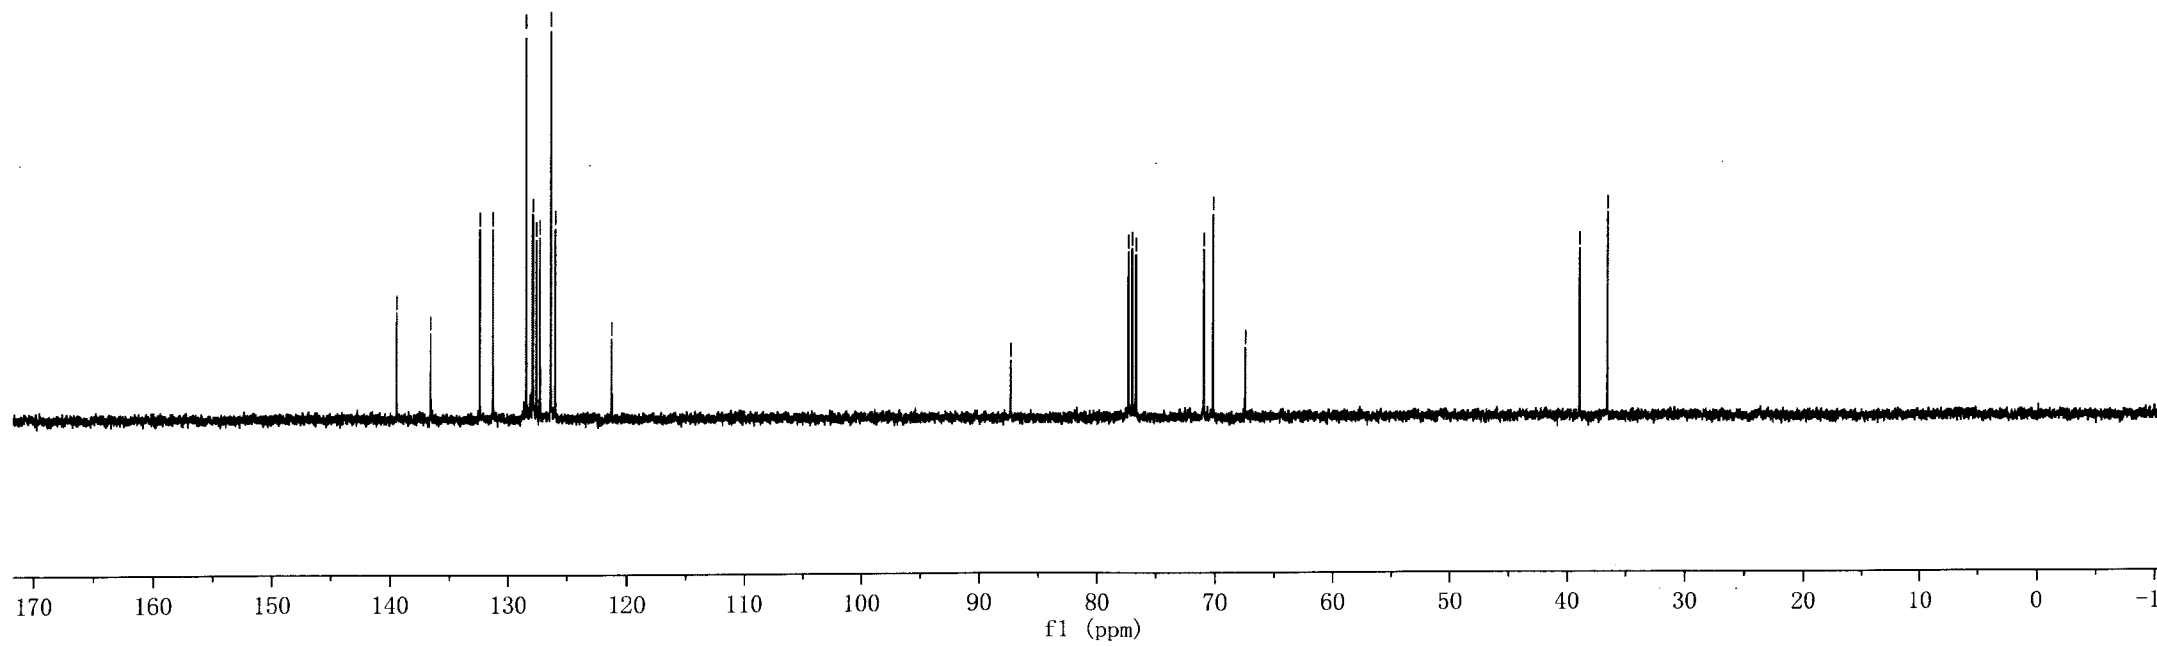

7.39  
7.37  
7.37  
7.26  
7.25  
7.24  
7.24  
7.23  
7.21  
7.21  
7.18  
7.18  
7.17  
7.16  
7.16  
7.16  
7.15  
7.14  
5.94  
5.93  
5.92  
5.90  
5.89  
5.89  
5.87  
5.86  
5.85  
5.27  
5.27  
5.26  
5.23  
5.22  
5.17  
5.17  
5.16  
5.16  
5.14  
5.14  
3.00  
4.00  
4.00  
3.99  
3.99  
3.98  
3.69  
3.67  
3.65  
3.31  
3.13  
3.08  
3.06  
3.04

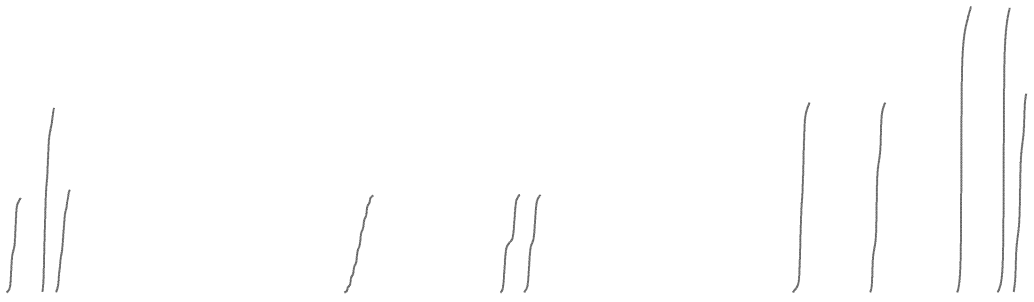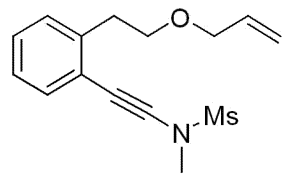

1p

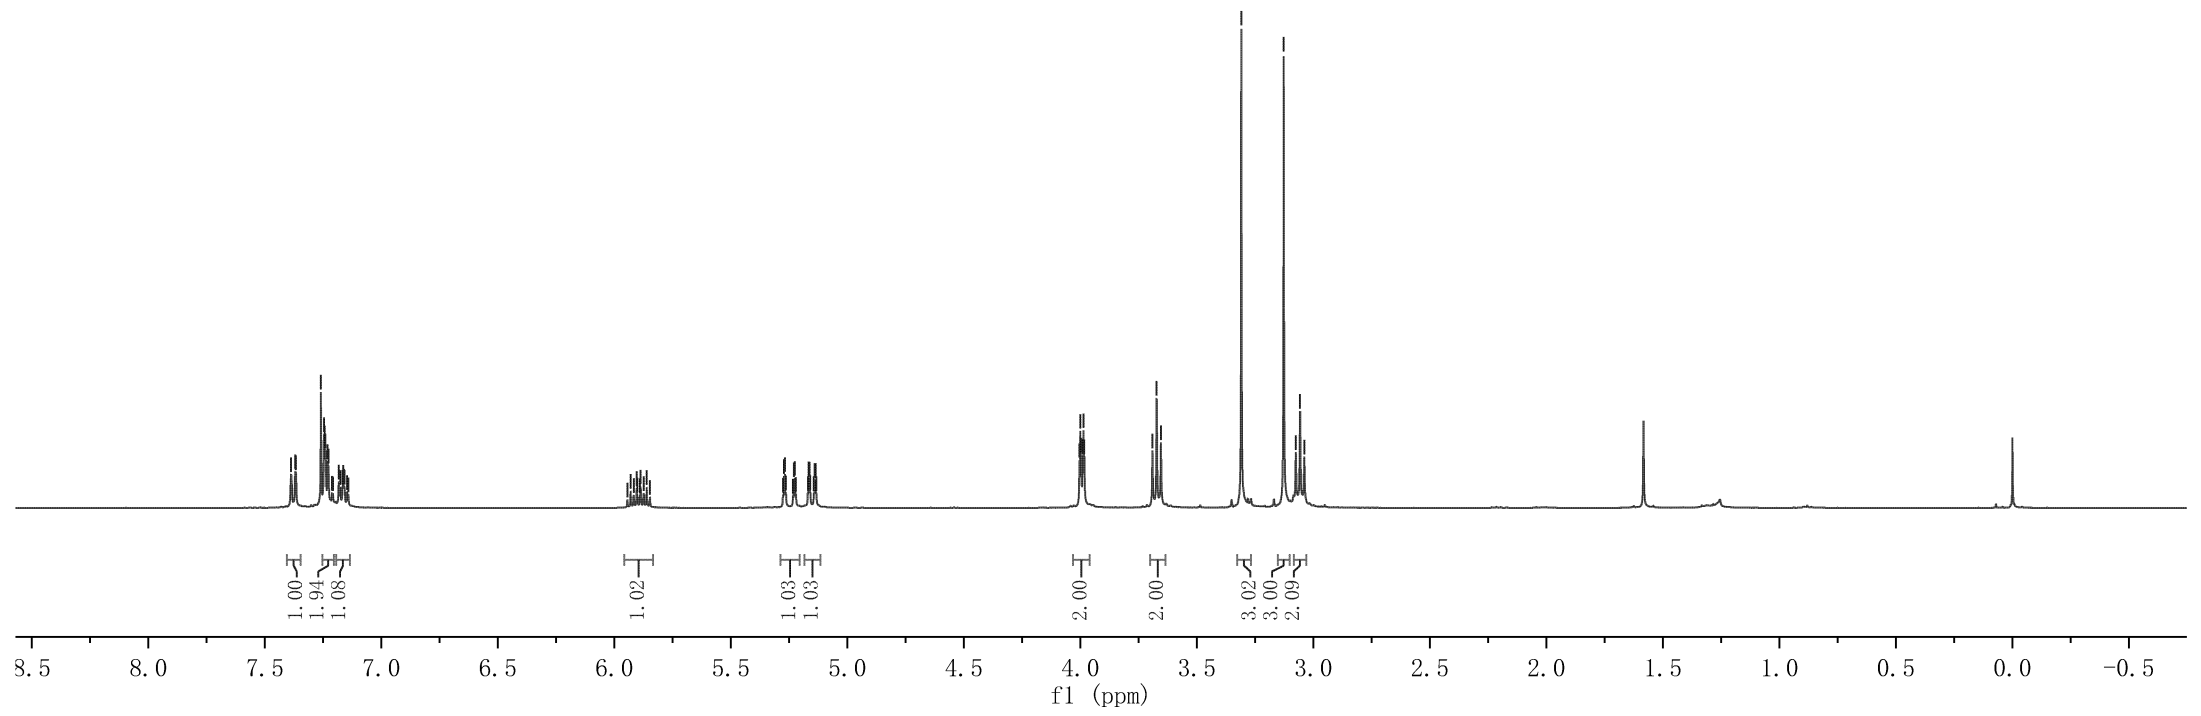

140.42  
134.89  
131.81  
129.53  
128.11  
126.25  
122.16  
116.69

86.51  
77.32  
77.00  
76.68  
71.78  
70.17  
68.17

39.20  
36.80  
35.21

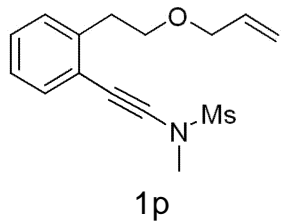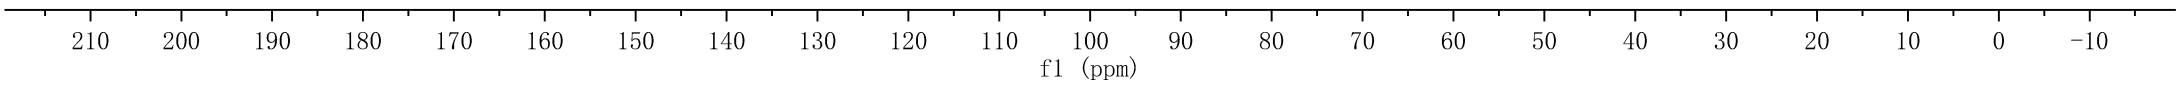

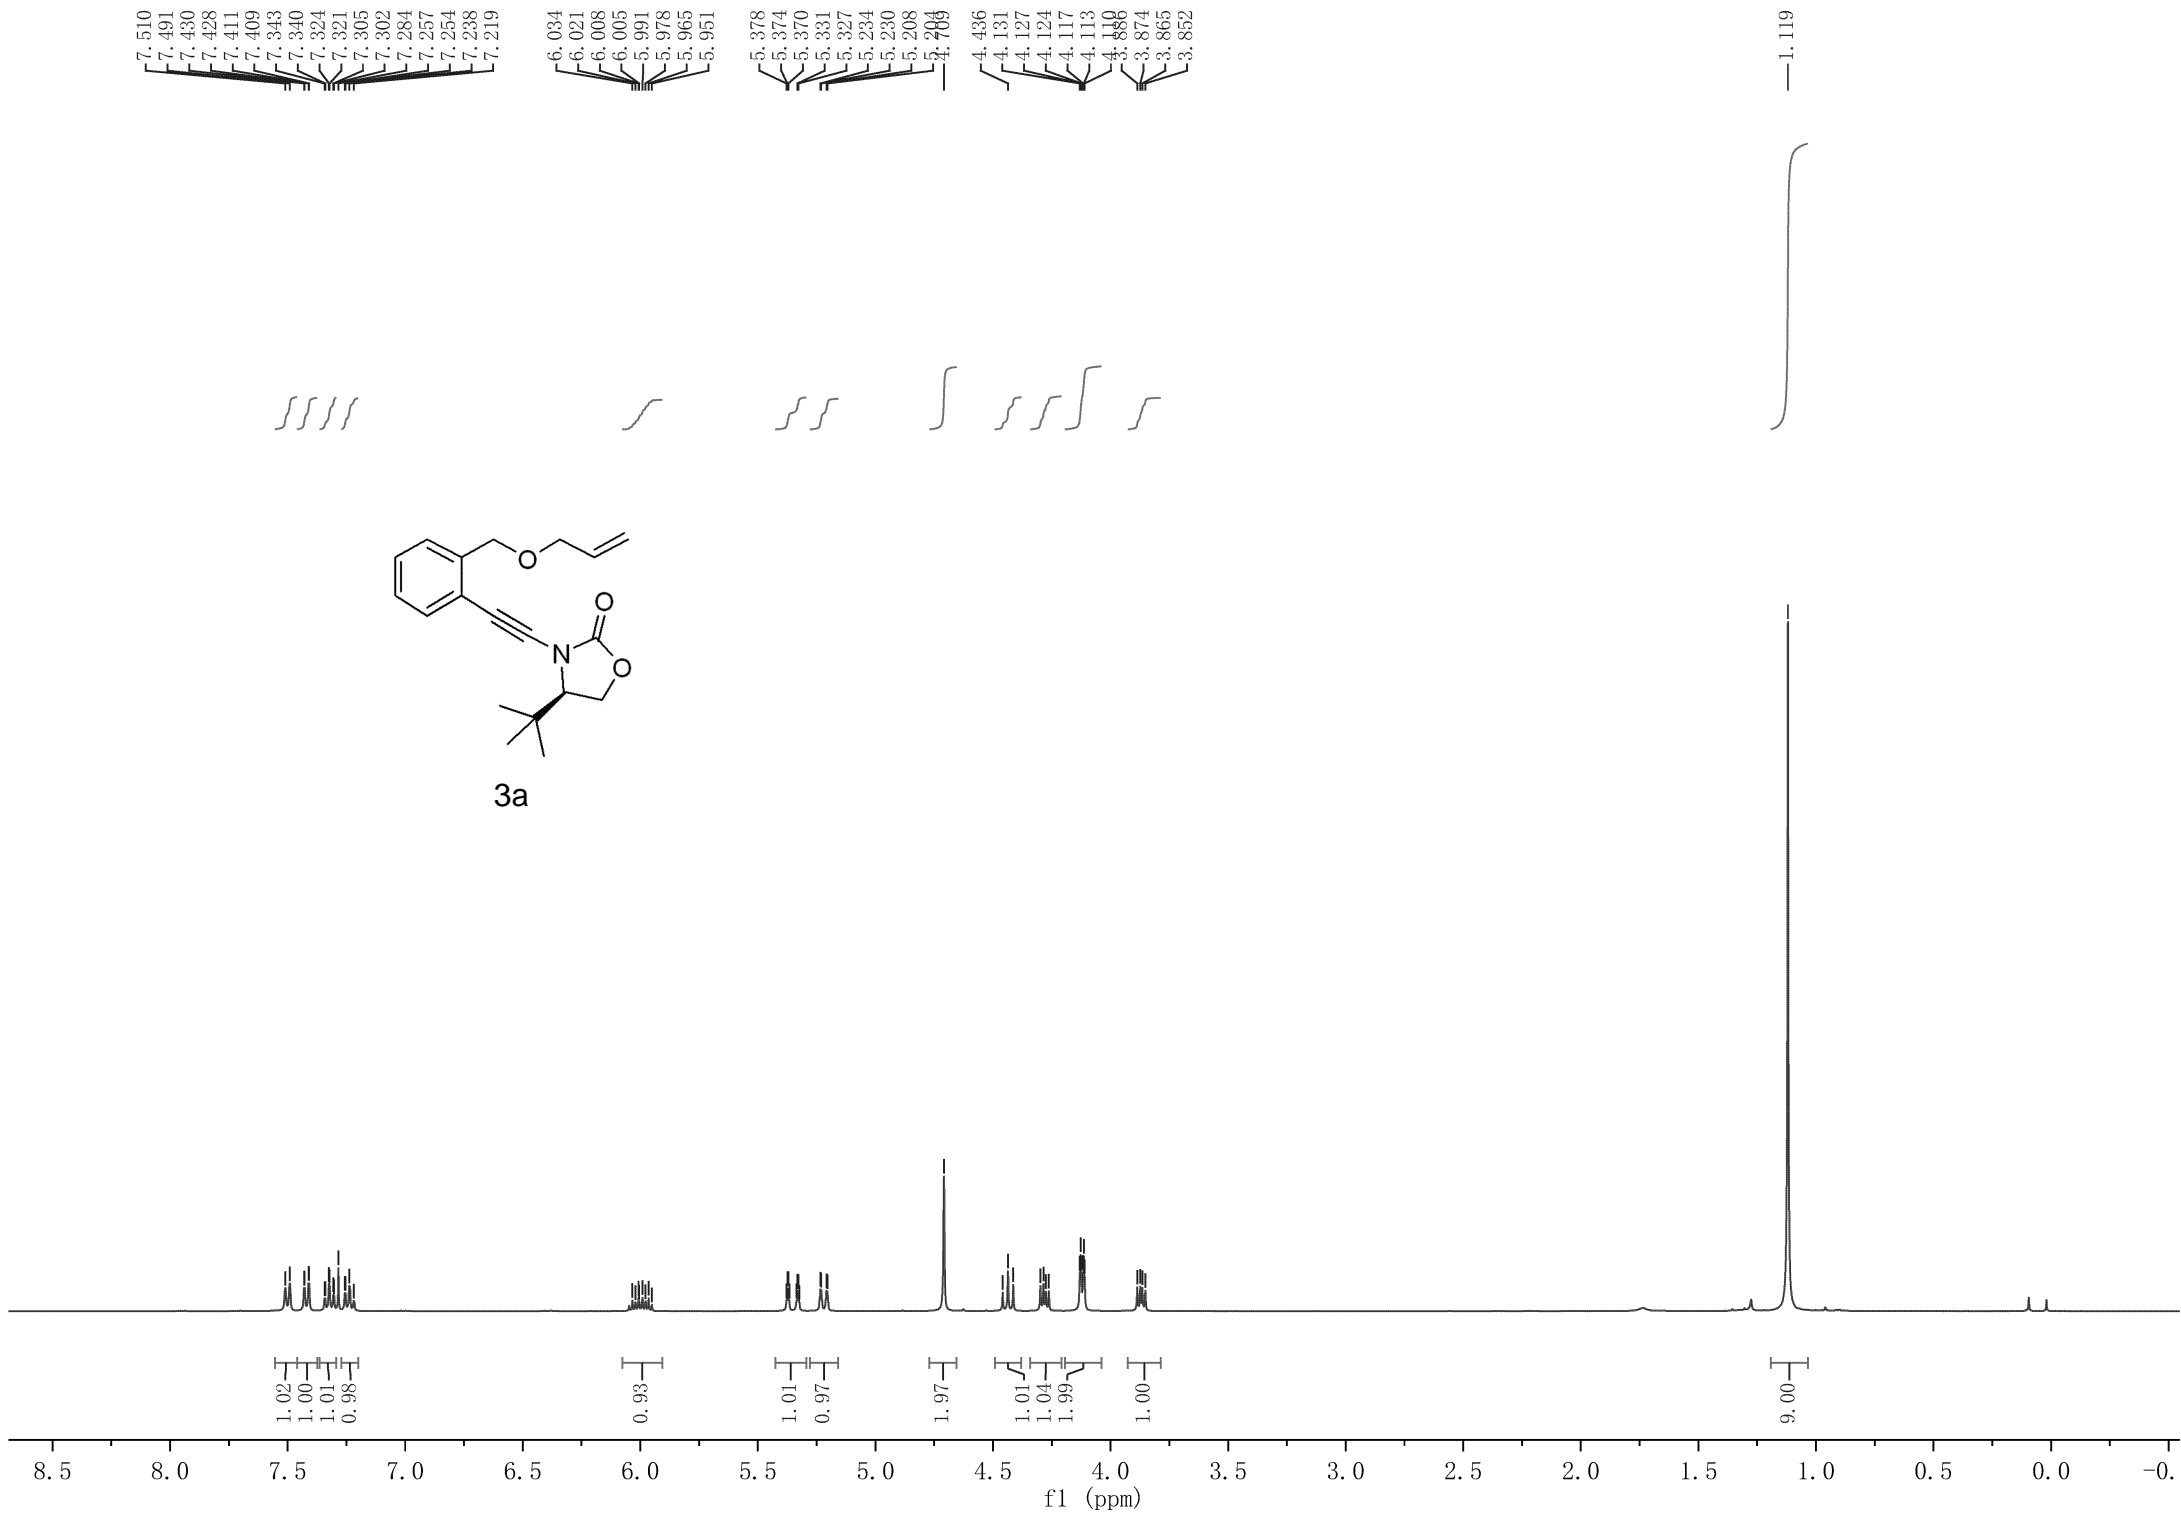

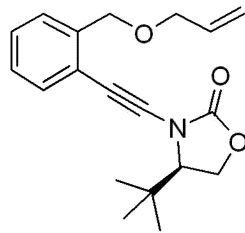

3a

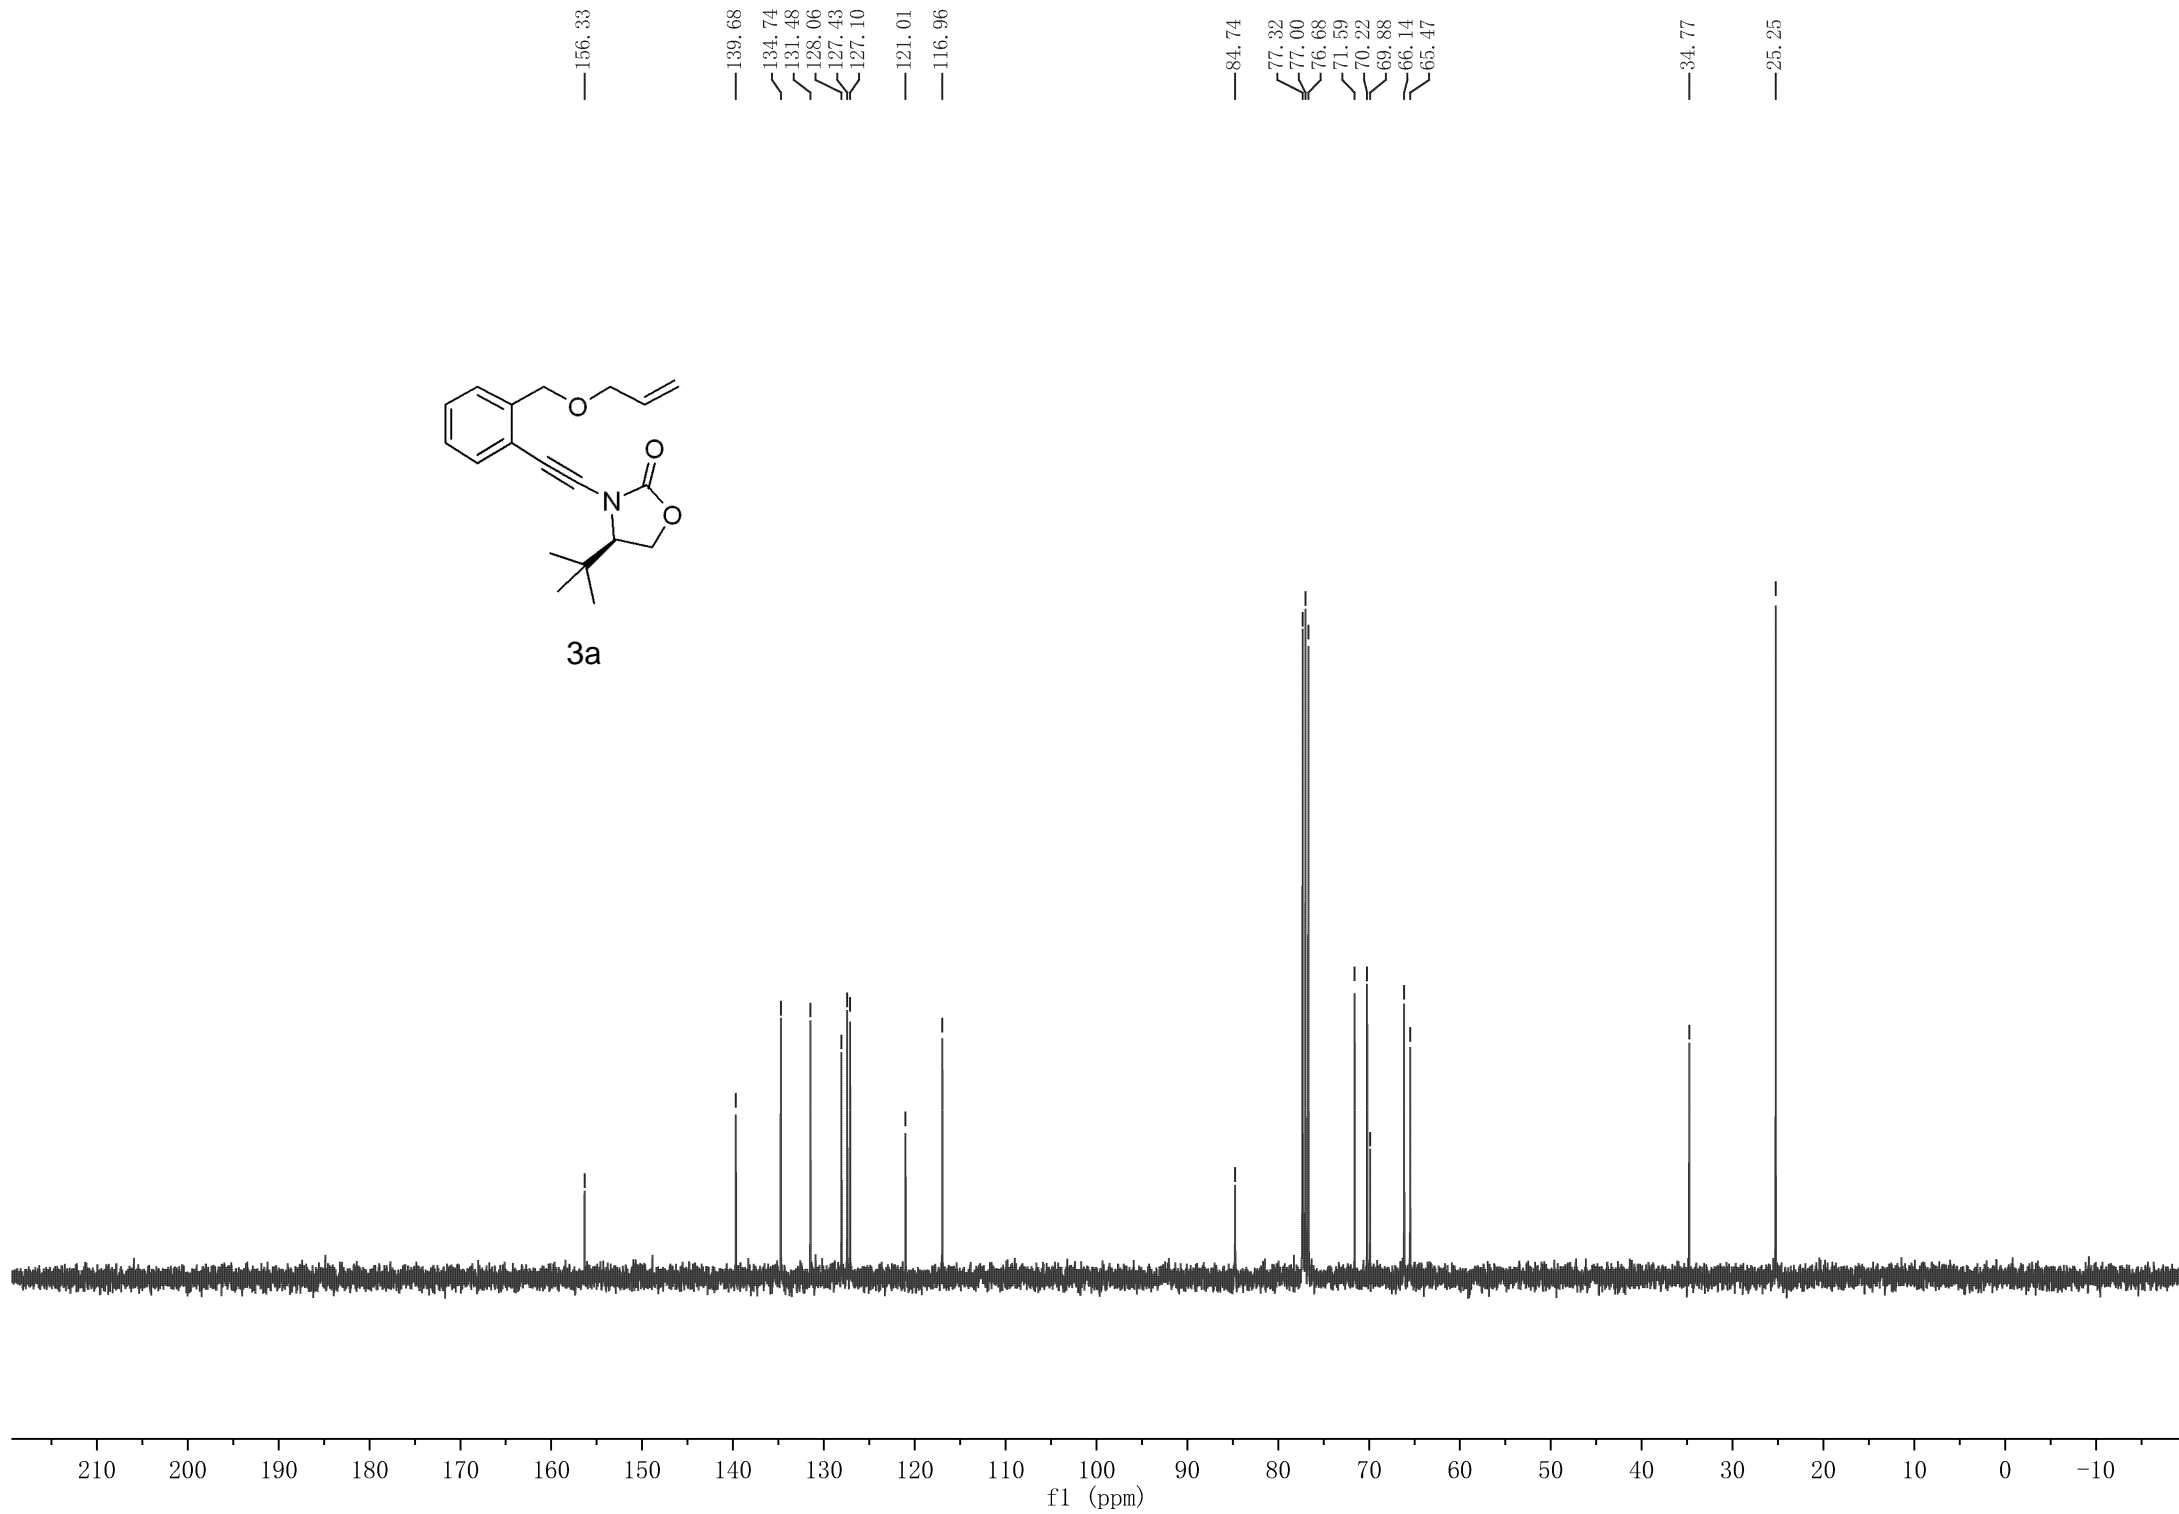

7.393  
7.379  
7.371  
7.357  
7.284  
7.251  
7.245  
7.227  
7.221  
6.942  
6.935  
6.921  
6.914  
6.900  
6.893  
6.015  
5.989  
5.985  
5.975  
5.972  
5.959  
5.958  
5.945  
5.371  
5.367  
5.328  
5.324  
5.245  
5.242  
5.238  
5.216  
5.212  
4.672  
4.432  
4.124  
4.121  
4.117  
4.110  
3.871  
3.858  
3.849  
3.836

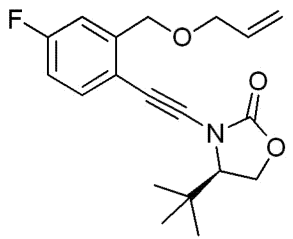

3d

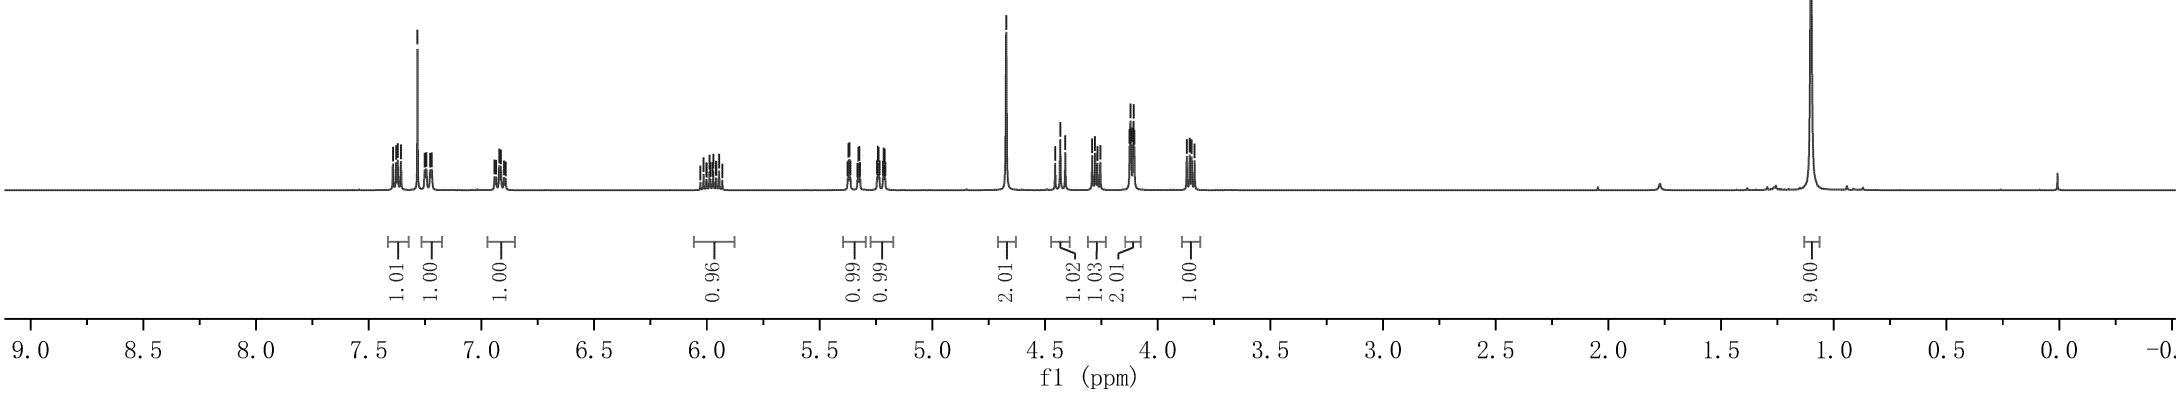



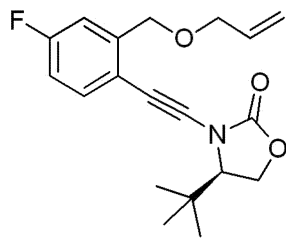

3d

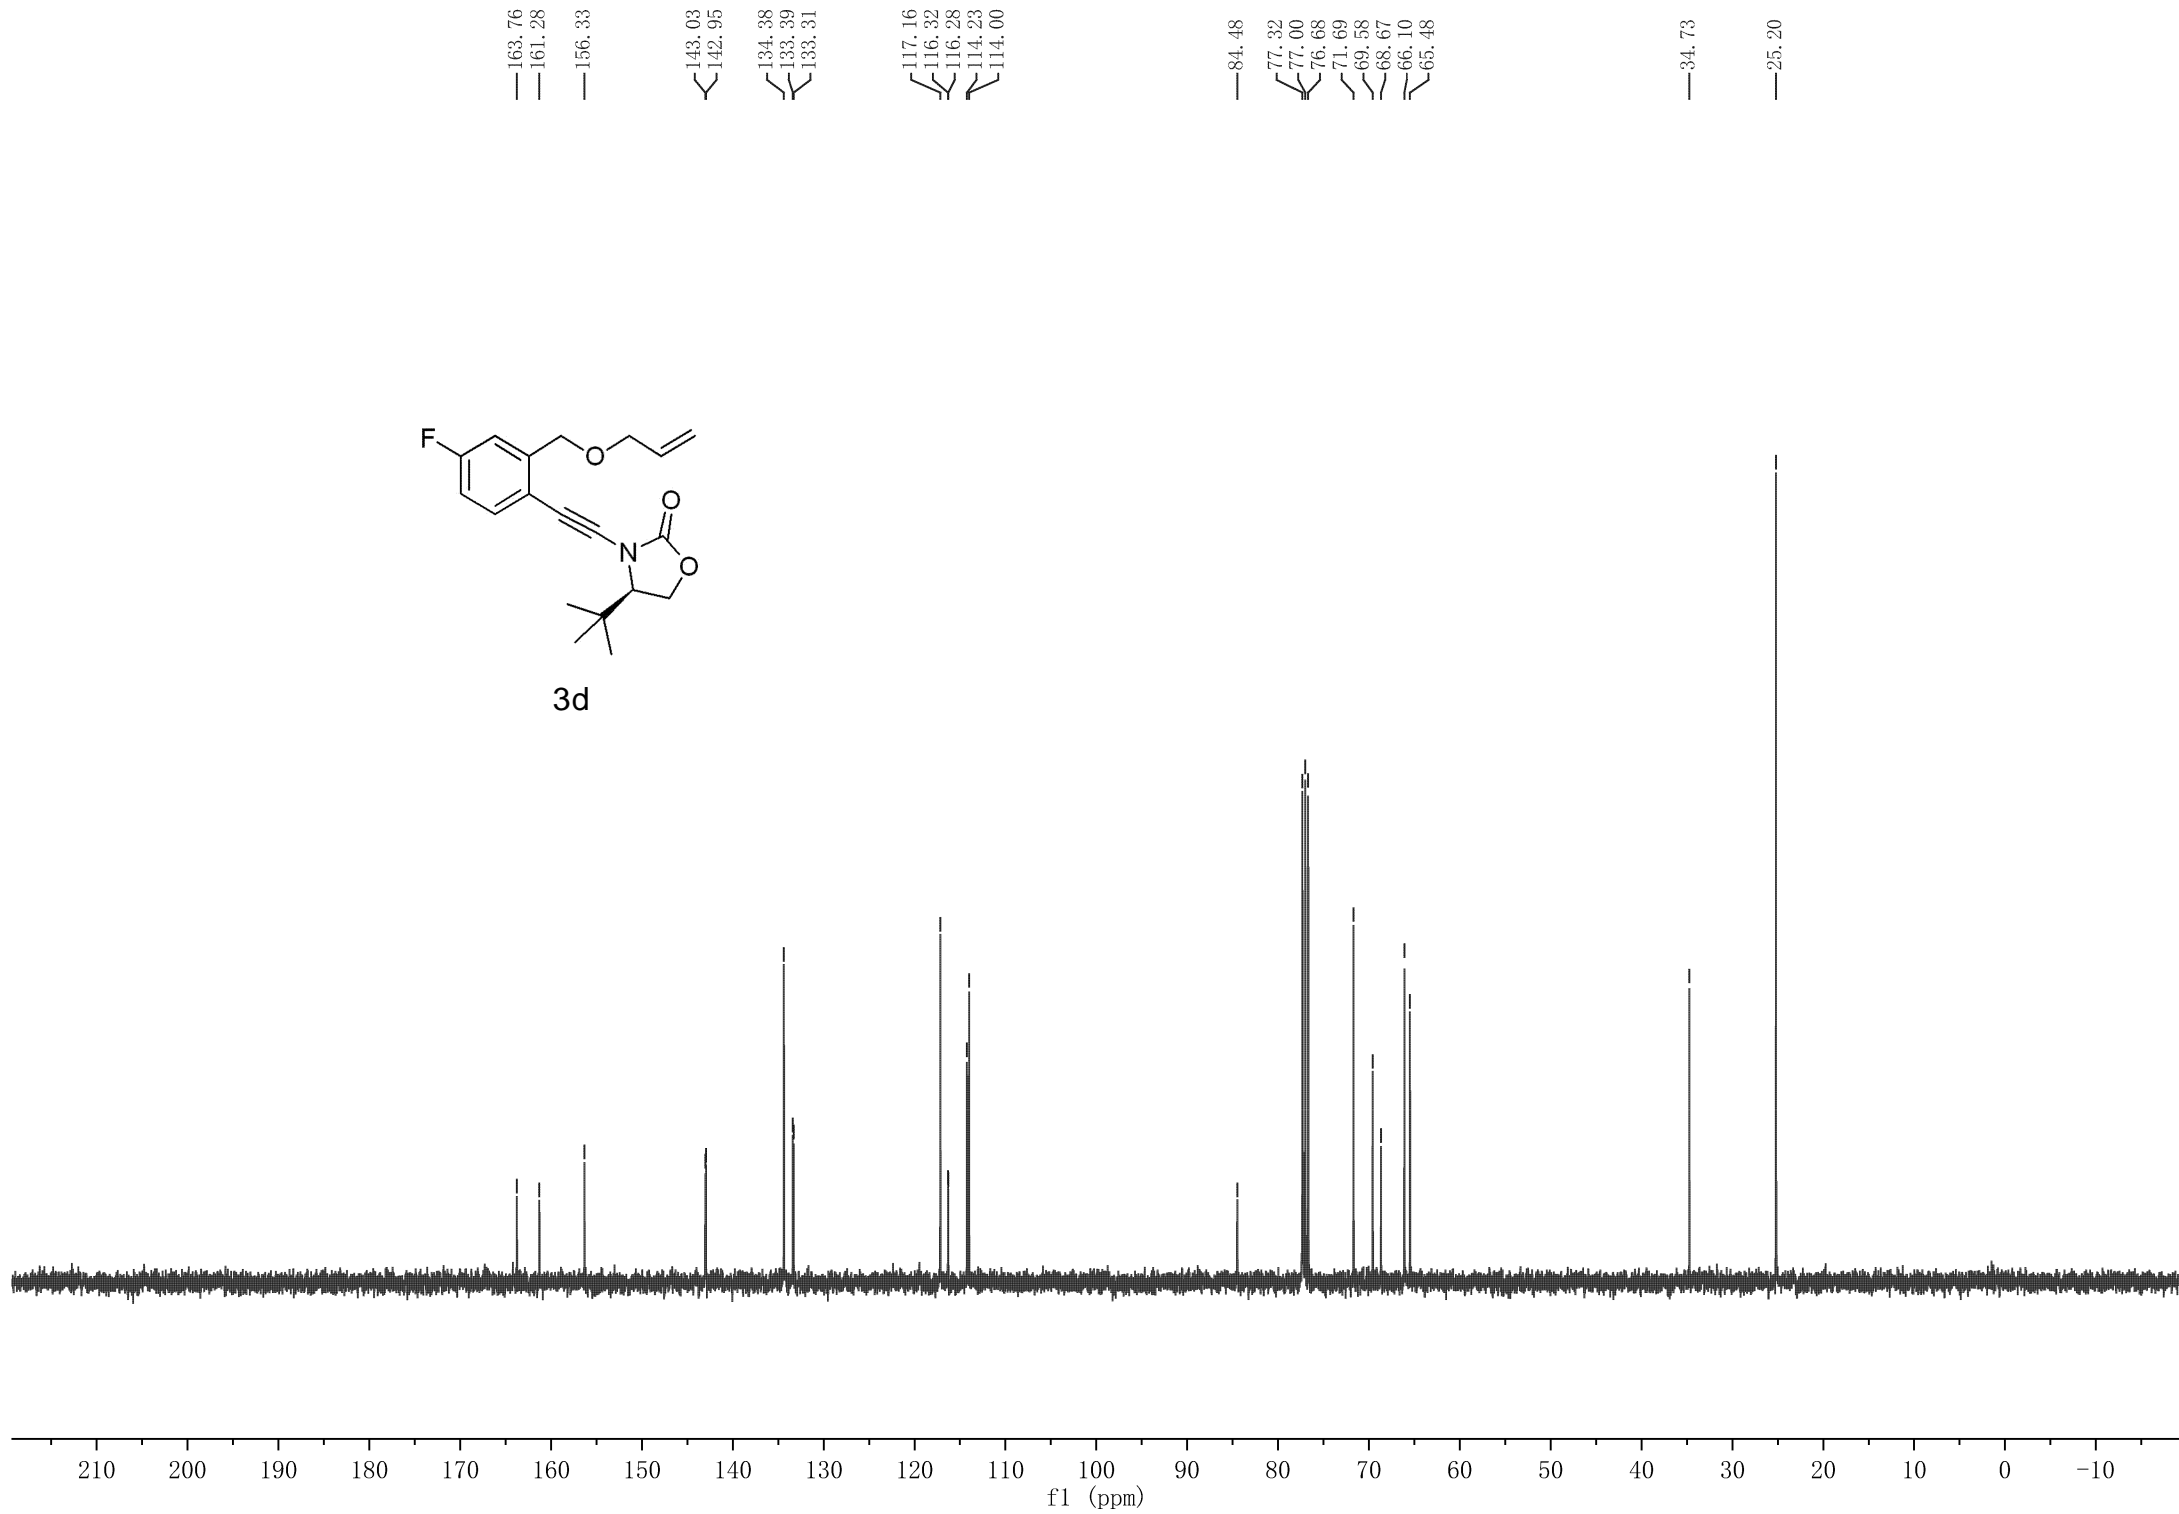

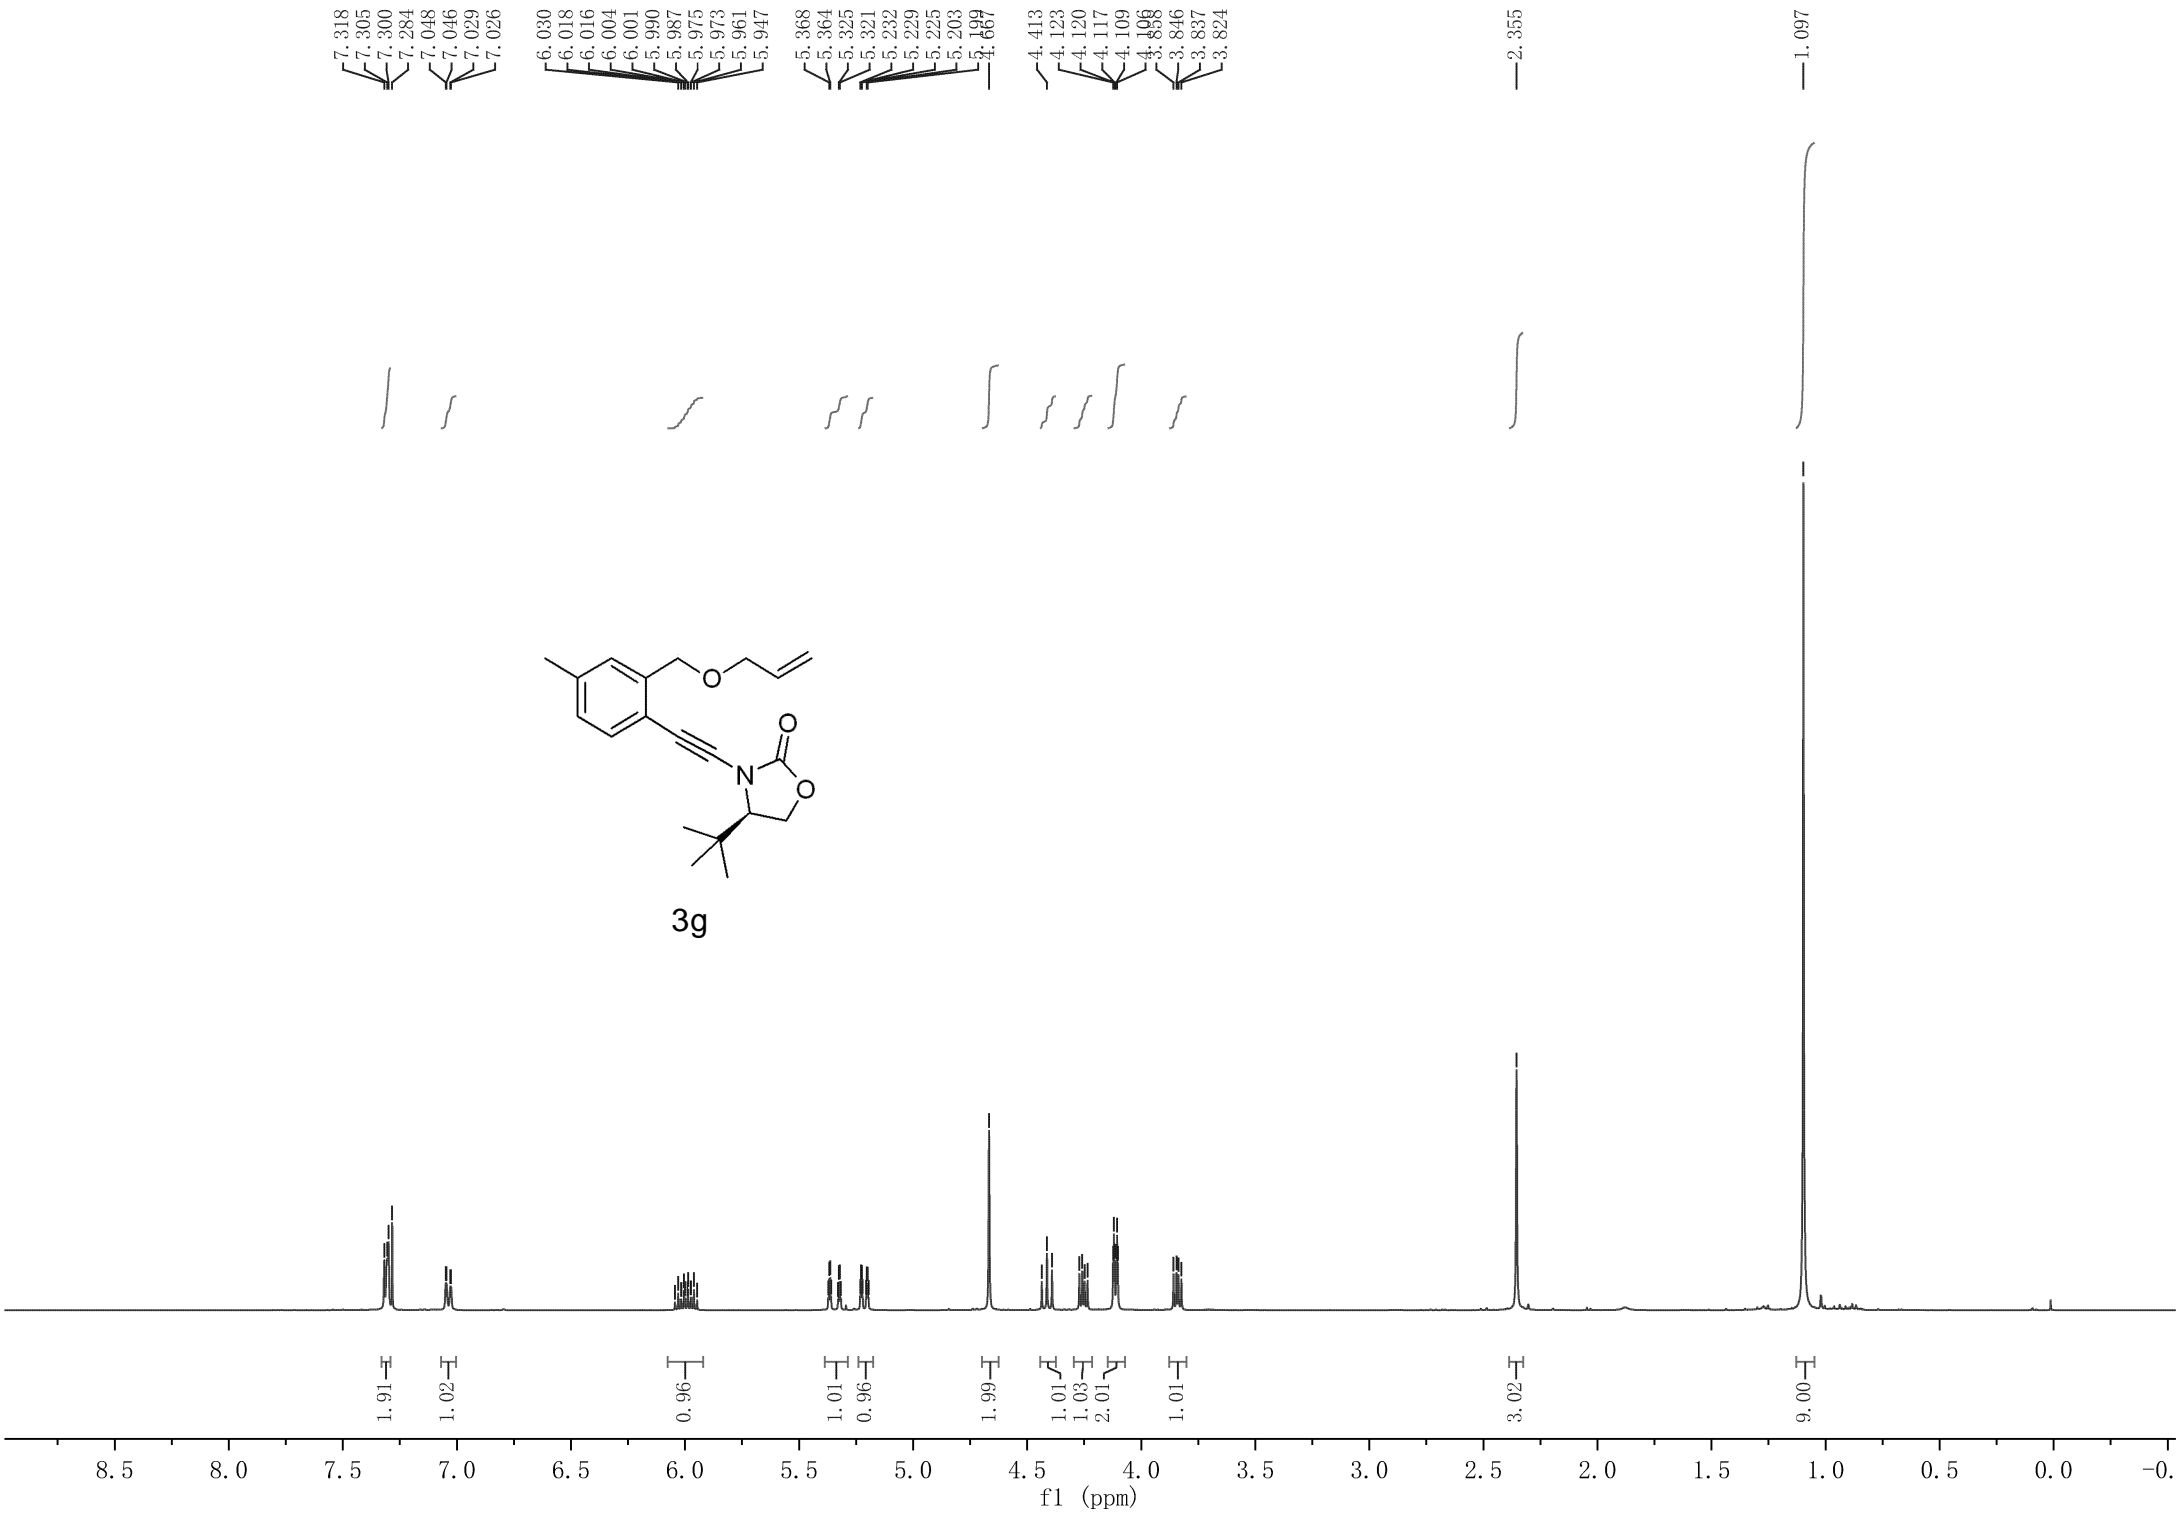

156.35  
139.50  
138.21  
134.09  
131.50  
128.12  
127.84  
117.88  
116.92

83.91  
77.32  
77.00  
76.68  
71.55  
70.14  
69.73  
66.05  
65.38

34.65  
25.16  
21.35

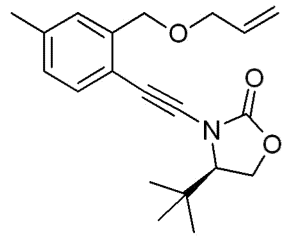

3g

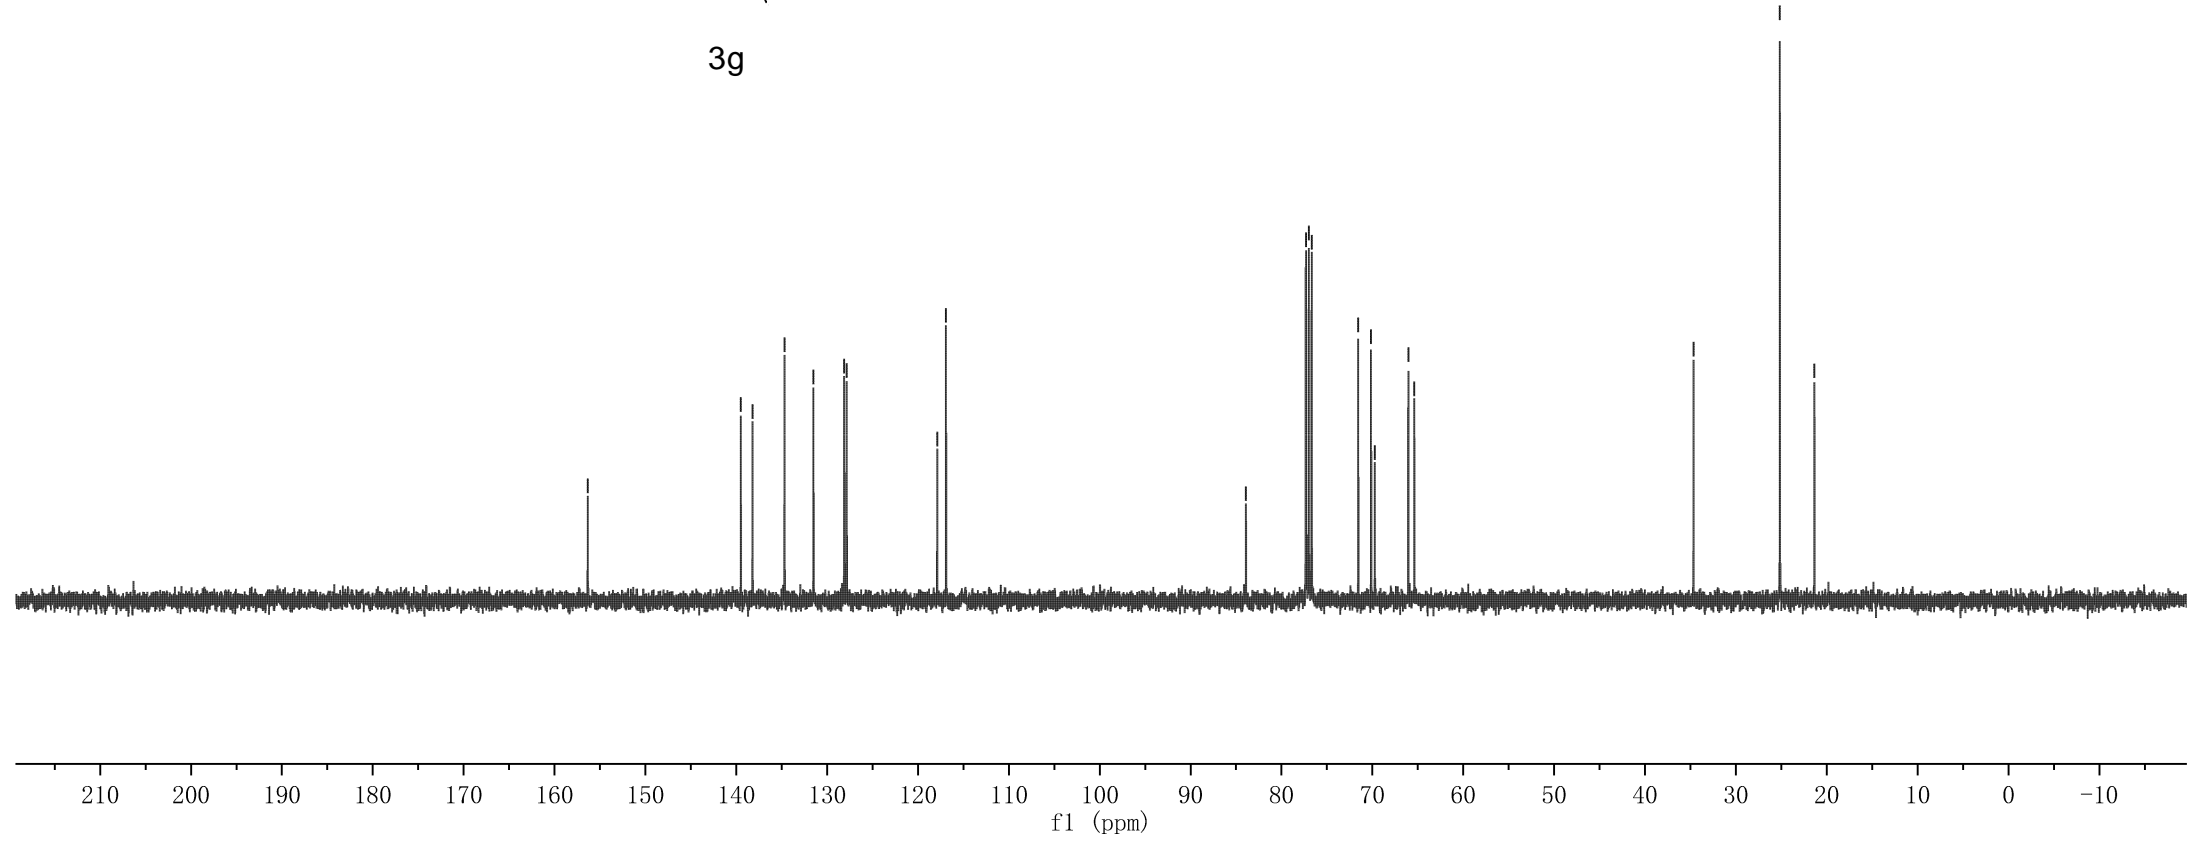

7.356  
7.335  
7.284  
7.059  
7.053  
6.775  
6.769  
6.754  
6.747  
6.019  
6.007  
5.993  
5.990  
5.979  
5.976  
5.964  
5.962  
5.950  
5.364  
5.360  
5.321  
5.317  
5.229  
5.225  
5.221  
5.199  
3.677  
4.411  
4.115  
4.111  
4.108  
4.101  
4.097  
3.836  
3.827  
3.817

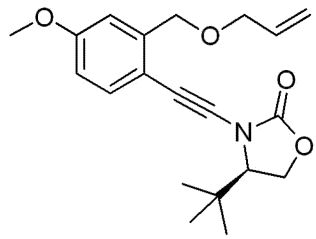

3h

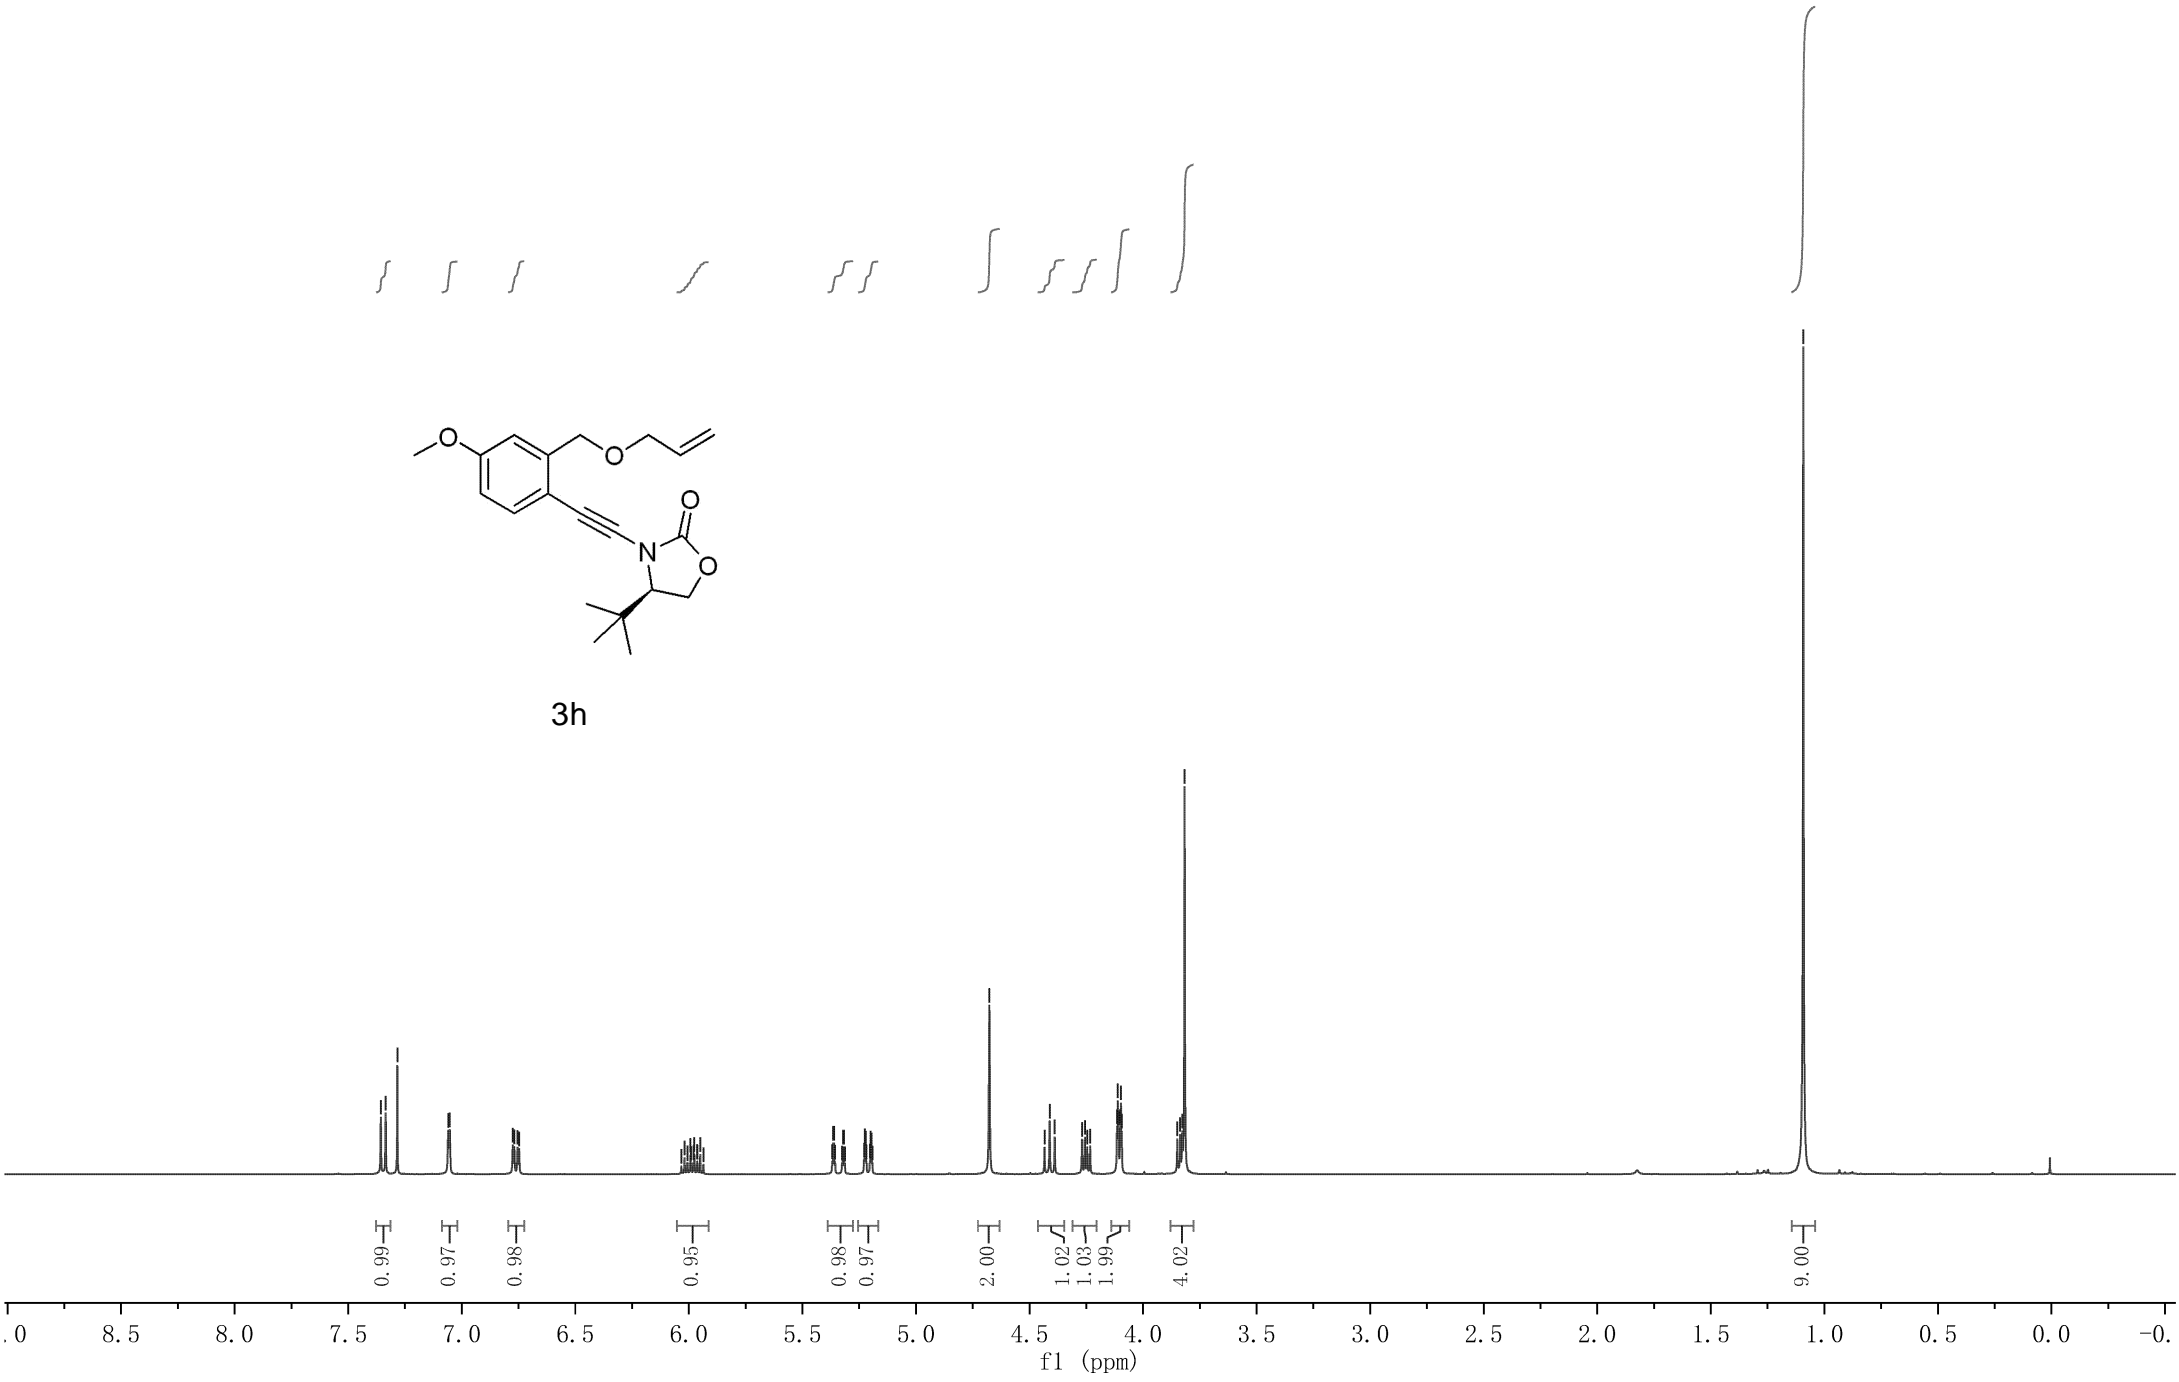

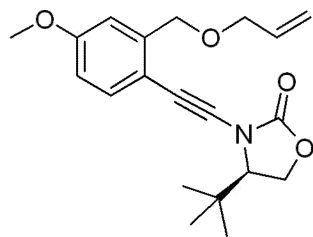

3h

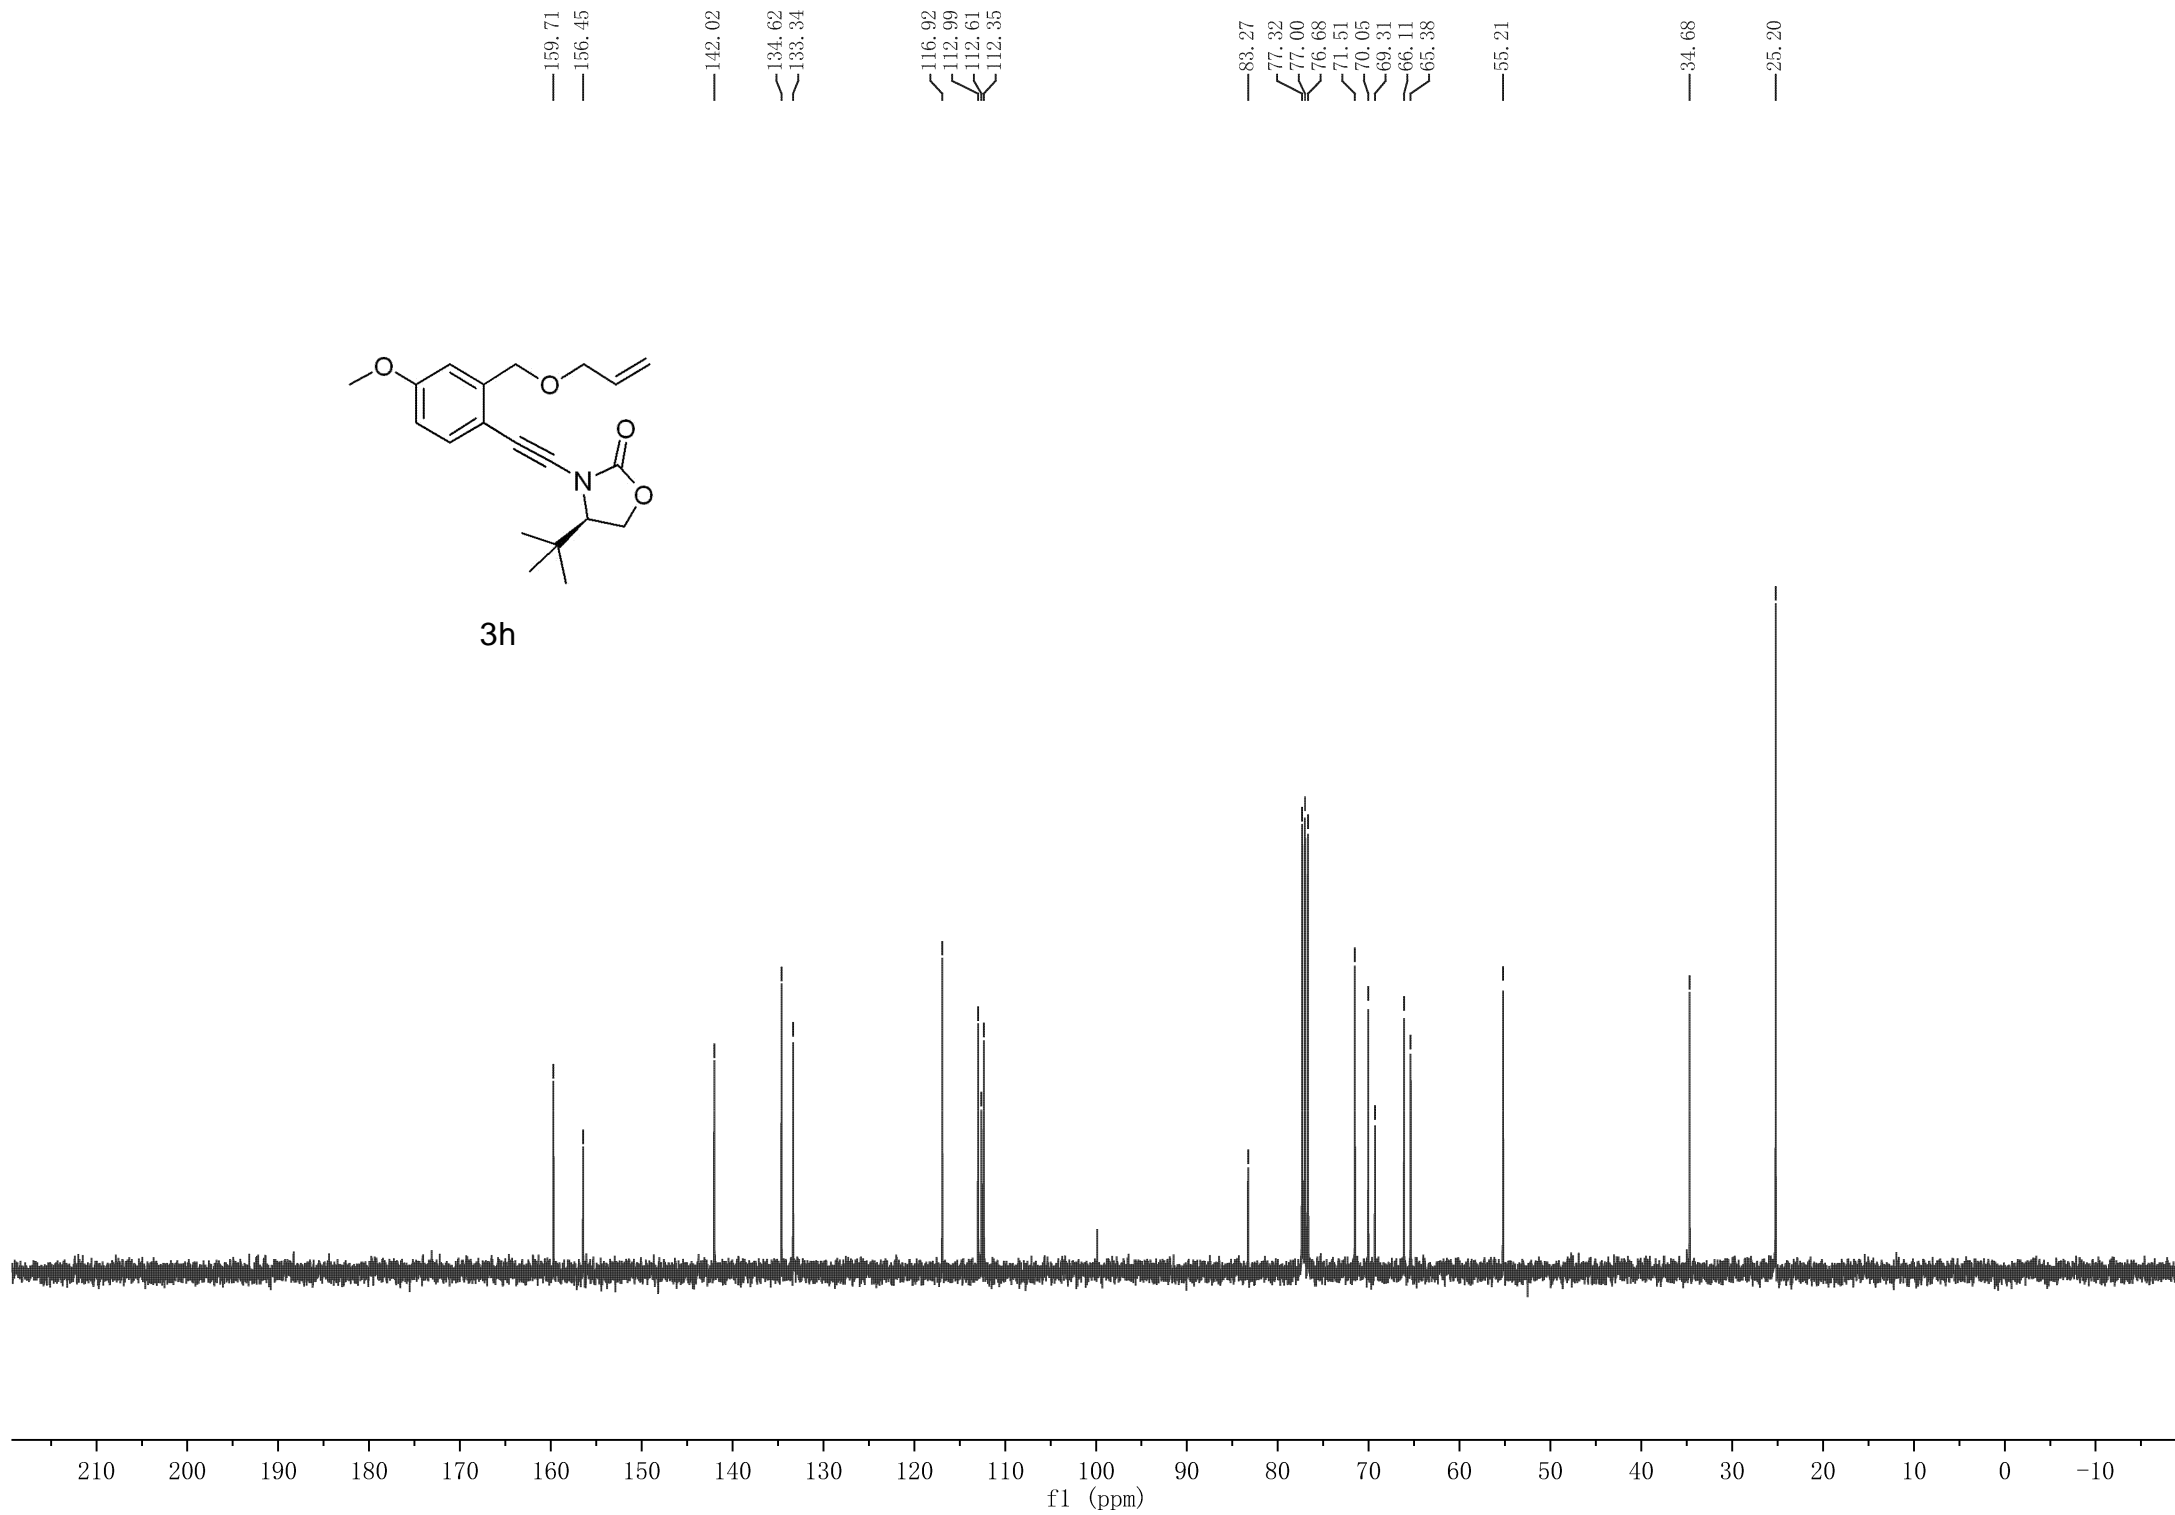

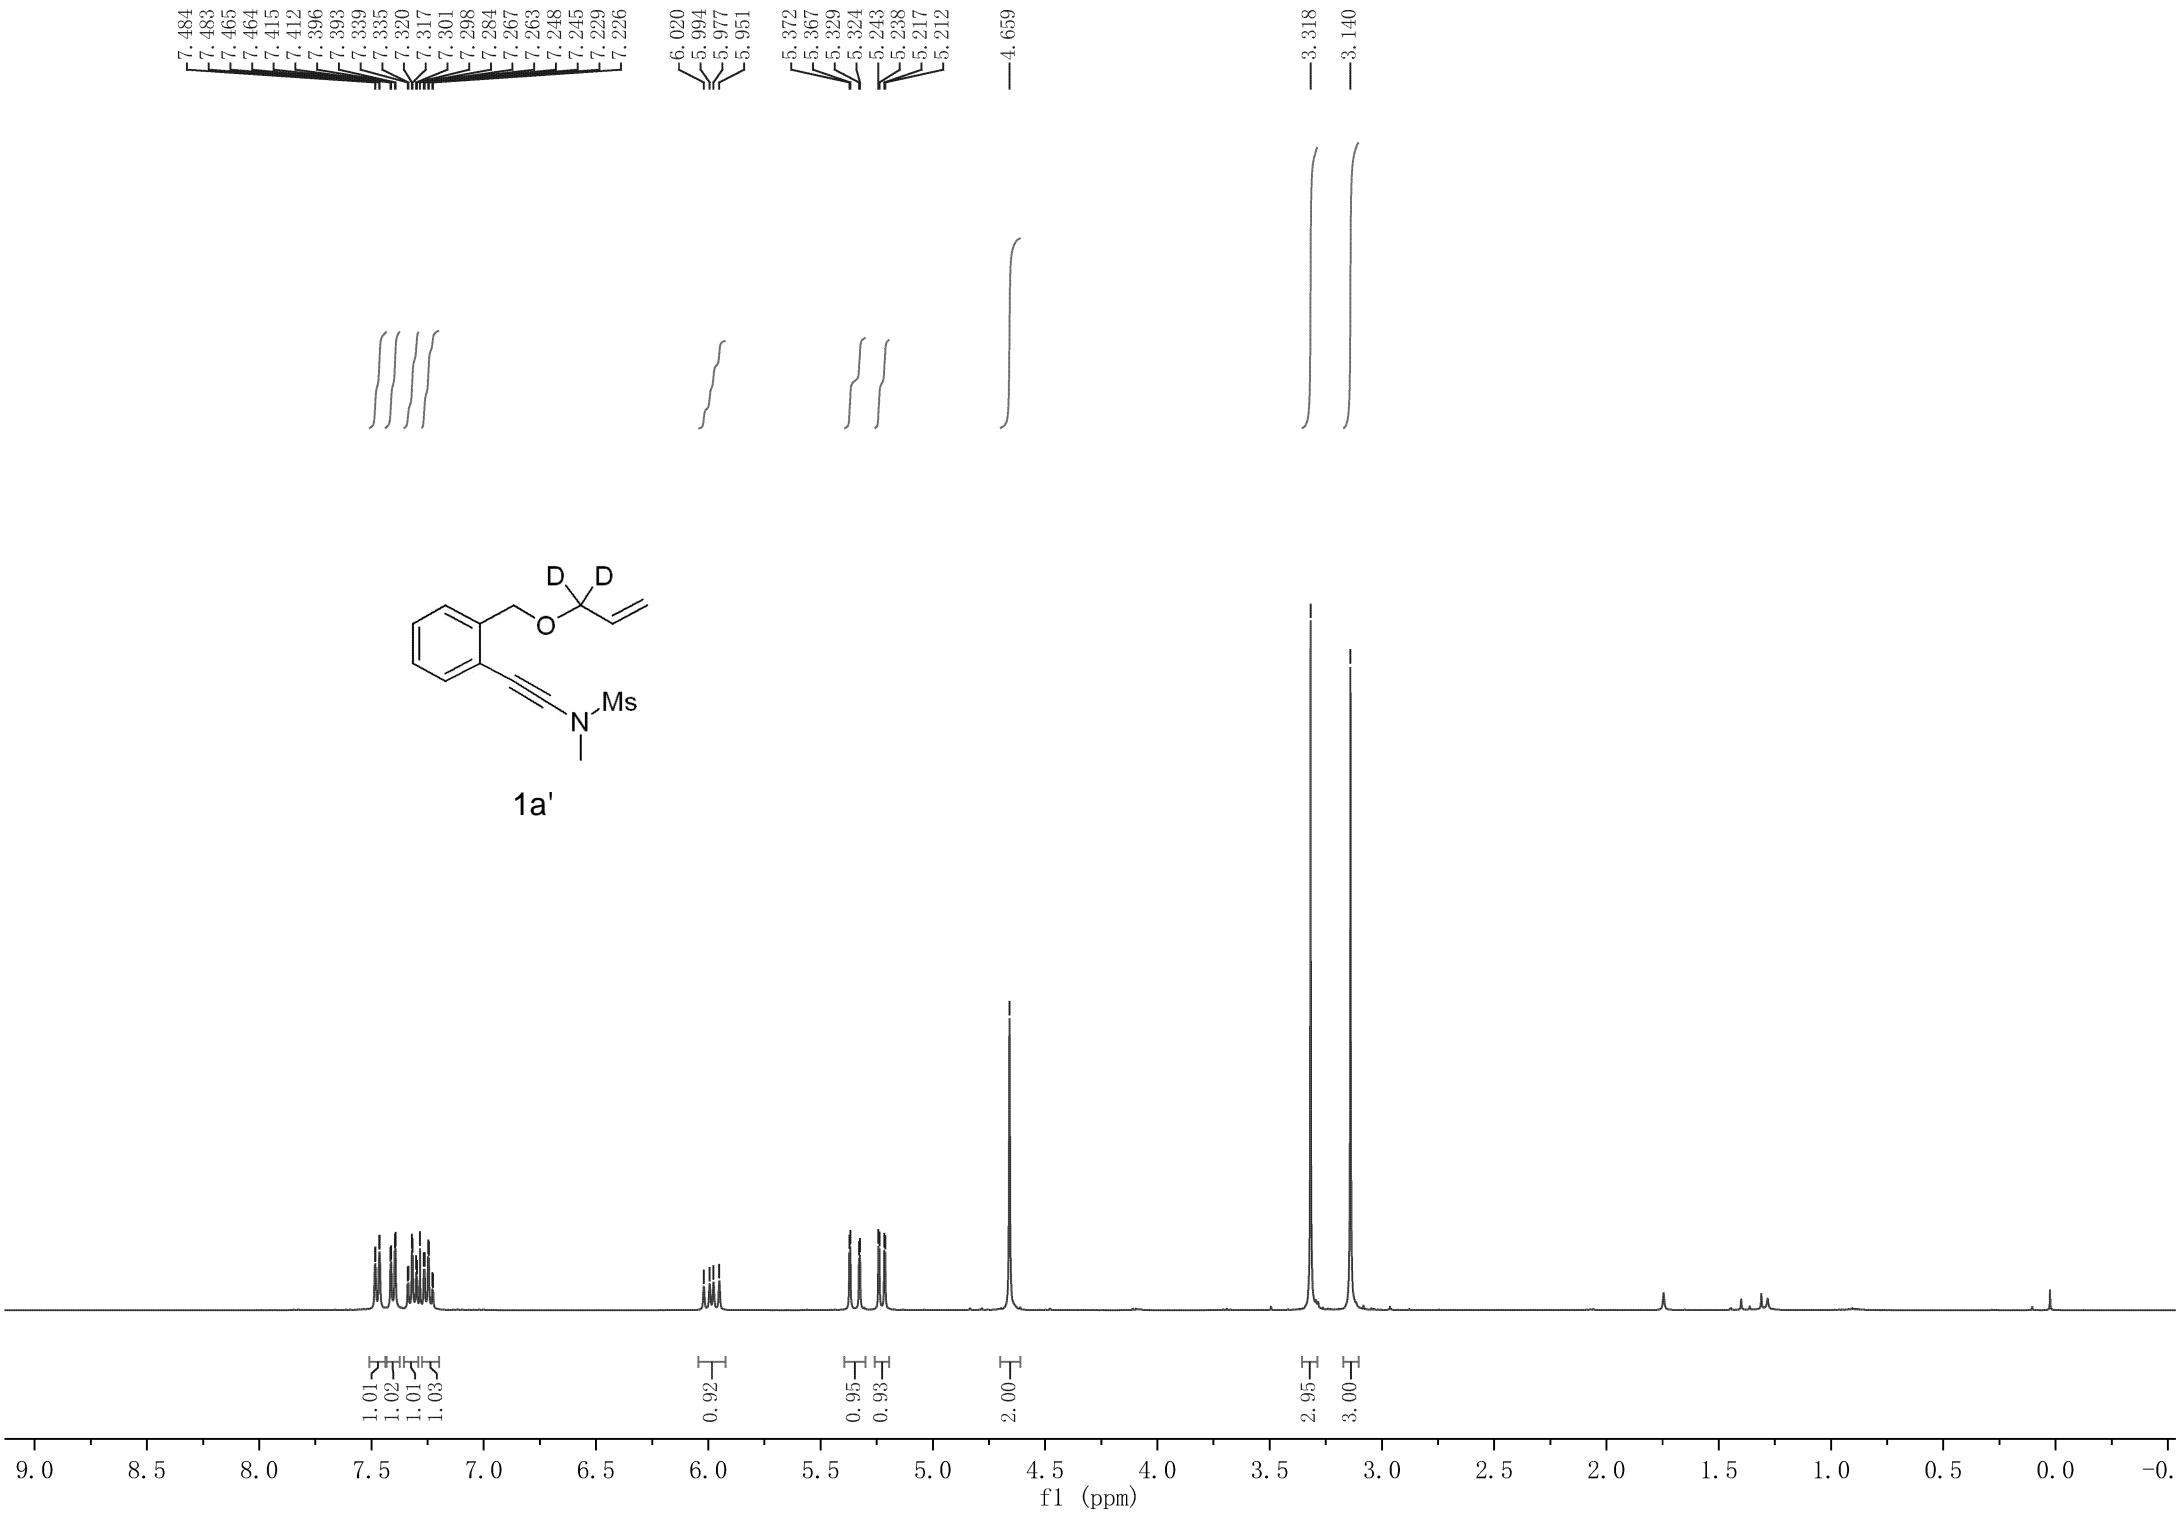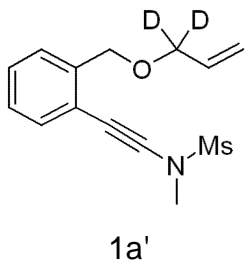

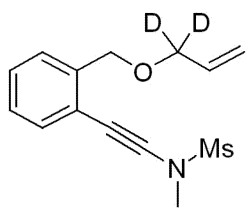

1a'

139.52  
134.57  
131.31  
127.96  
127.82  
127.25  
121.15  
117.11

87.29

77.32  
77.00  
76.68

70.20  
67.47

39.06  
36.72

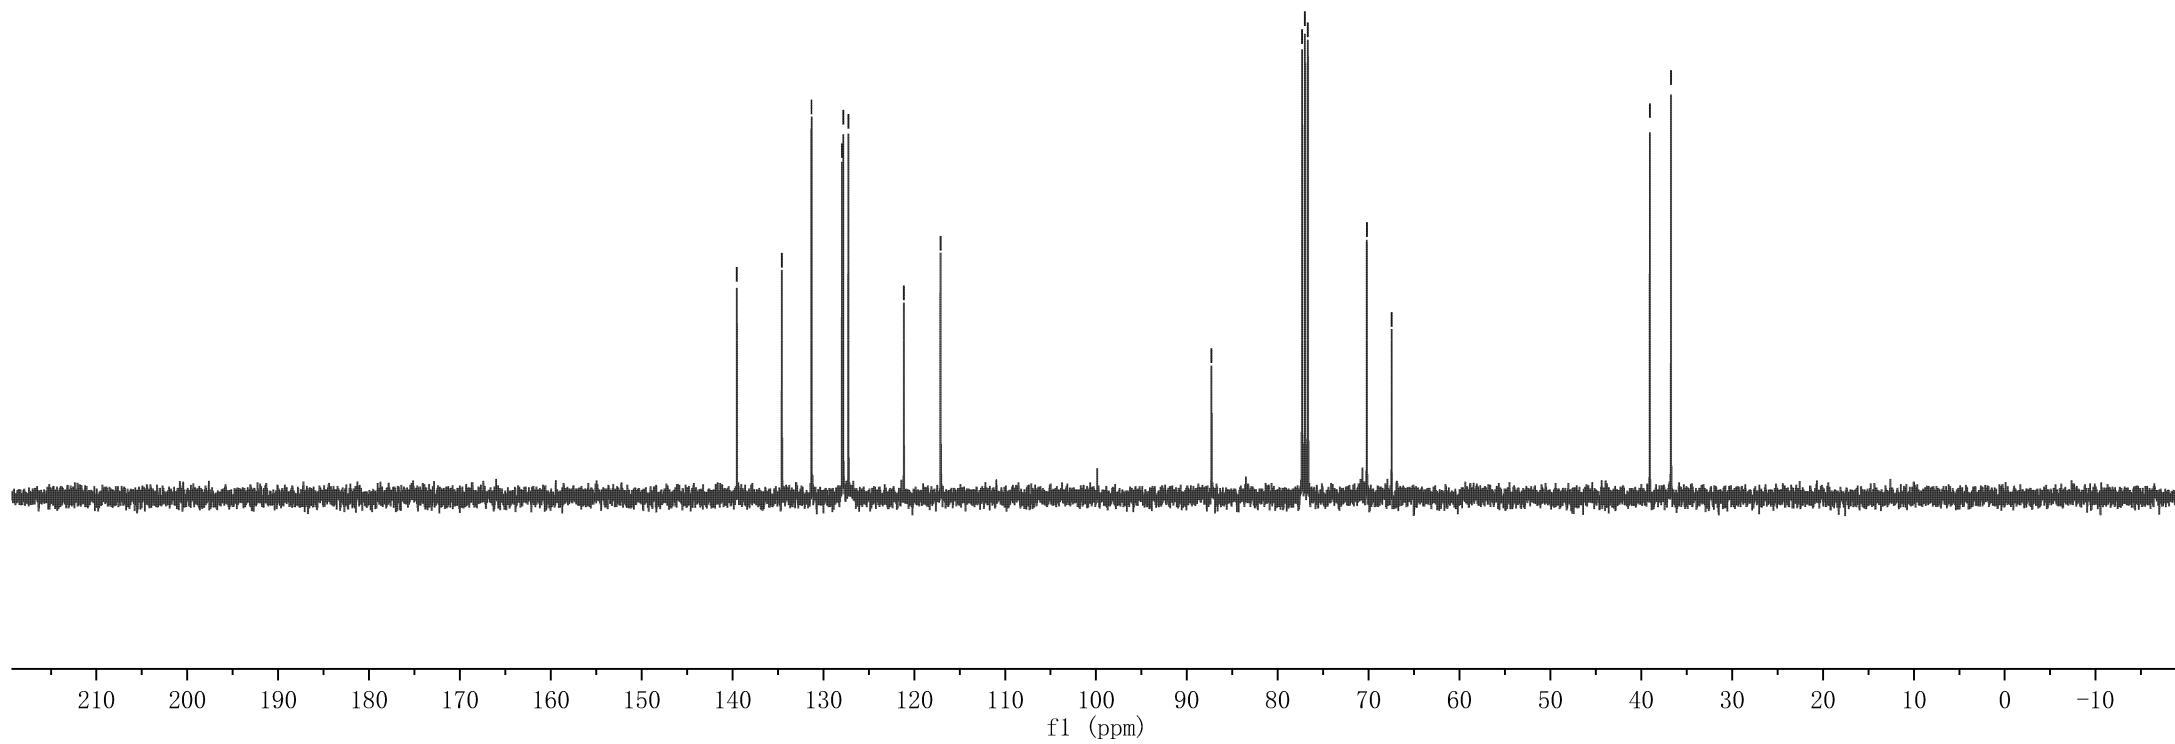

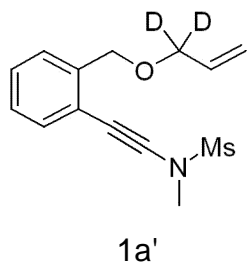

134.57  
131.31  
127.95  
127.81  
127.25

117.10

70.19

39.05  
36.72

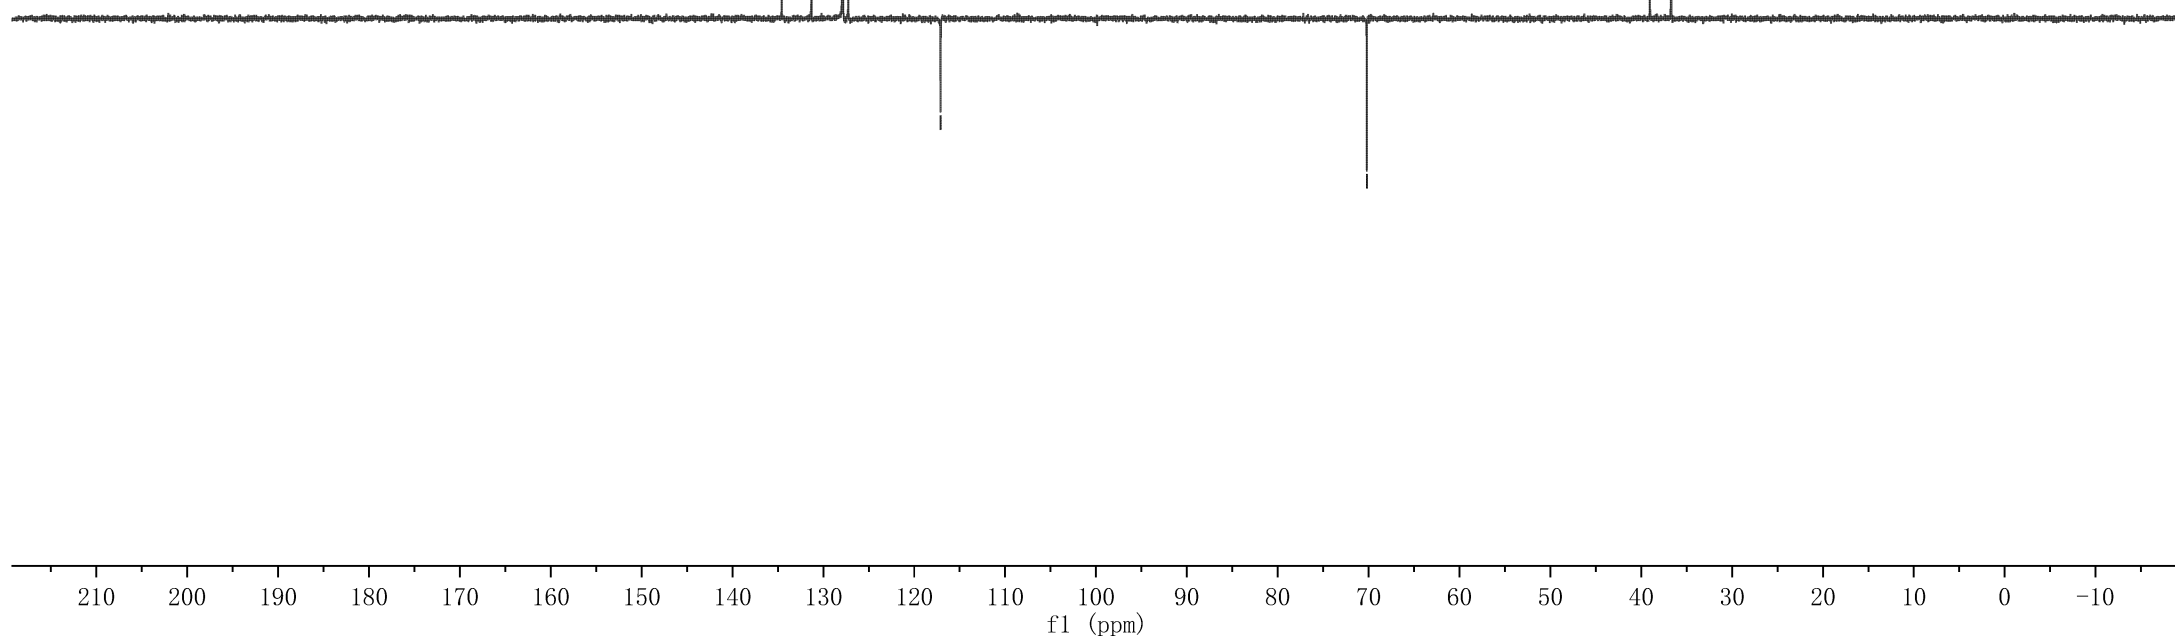



7.372  
7.355  
7.337  
7.321  
7.303  
7.284  
7.262  
7.240  
7.230  
7.211

5.923  
5.906  
5.898  
5.881  
5.864  
5.847  
5.838  
5.821  
5.431  
5.396  
5.300  
5.265  
5.151  
5.131  
5.106

3.713  
3.696  
3.680

2.863  
2.848  
2.829  
2.812  
2.796  
2.738  
2.720  
2.702  
2.684  
2.666

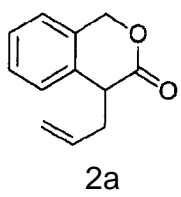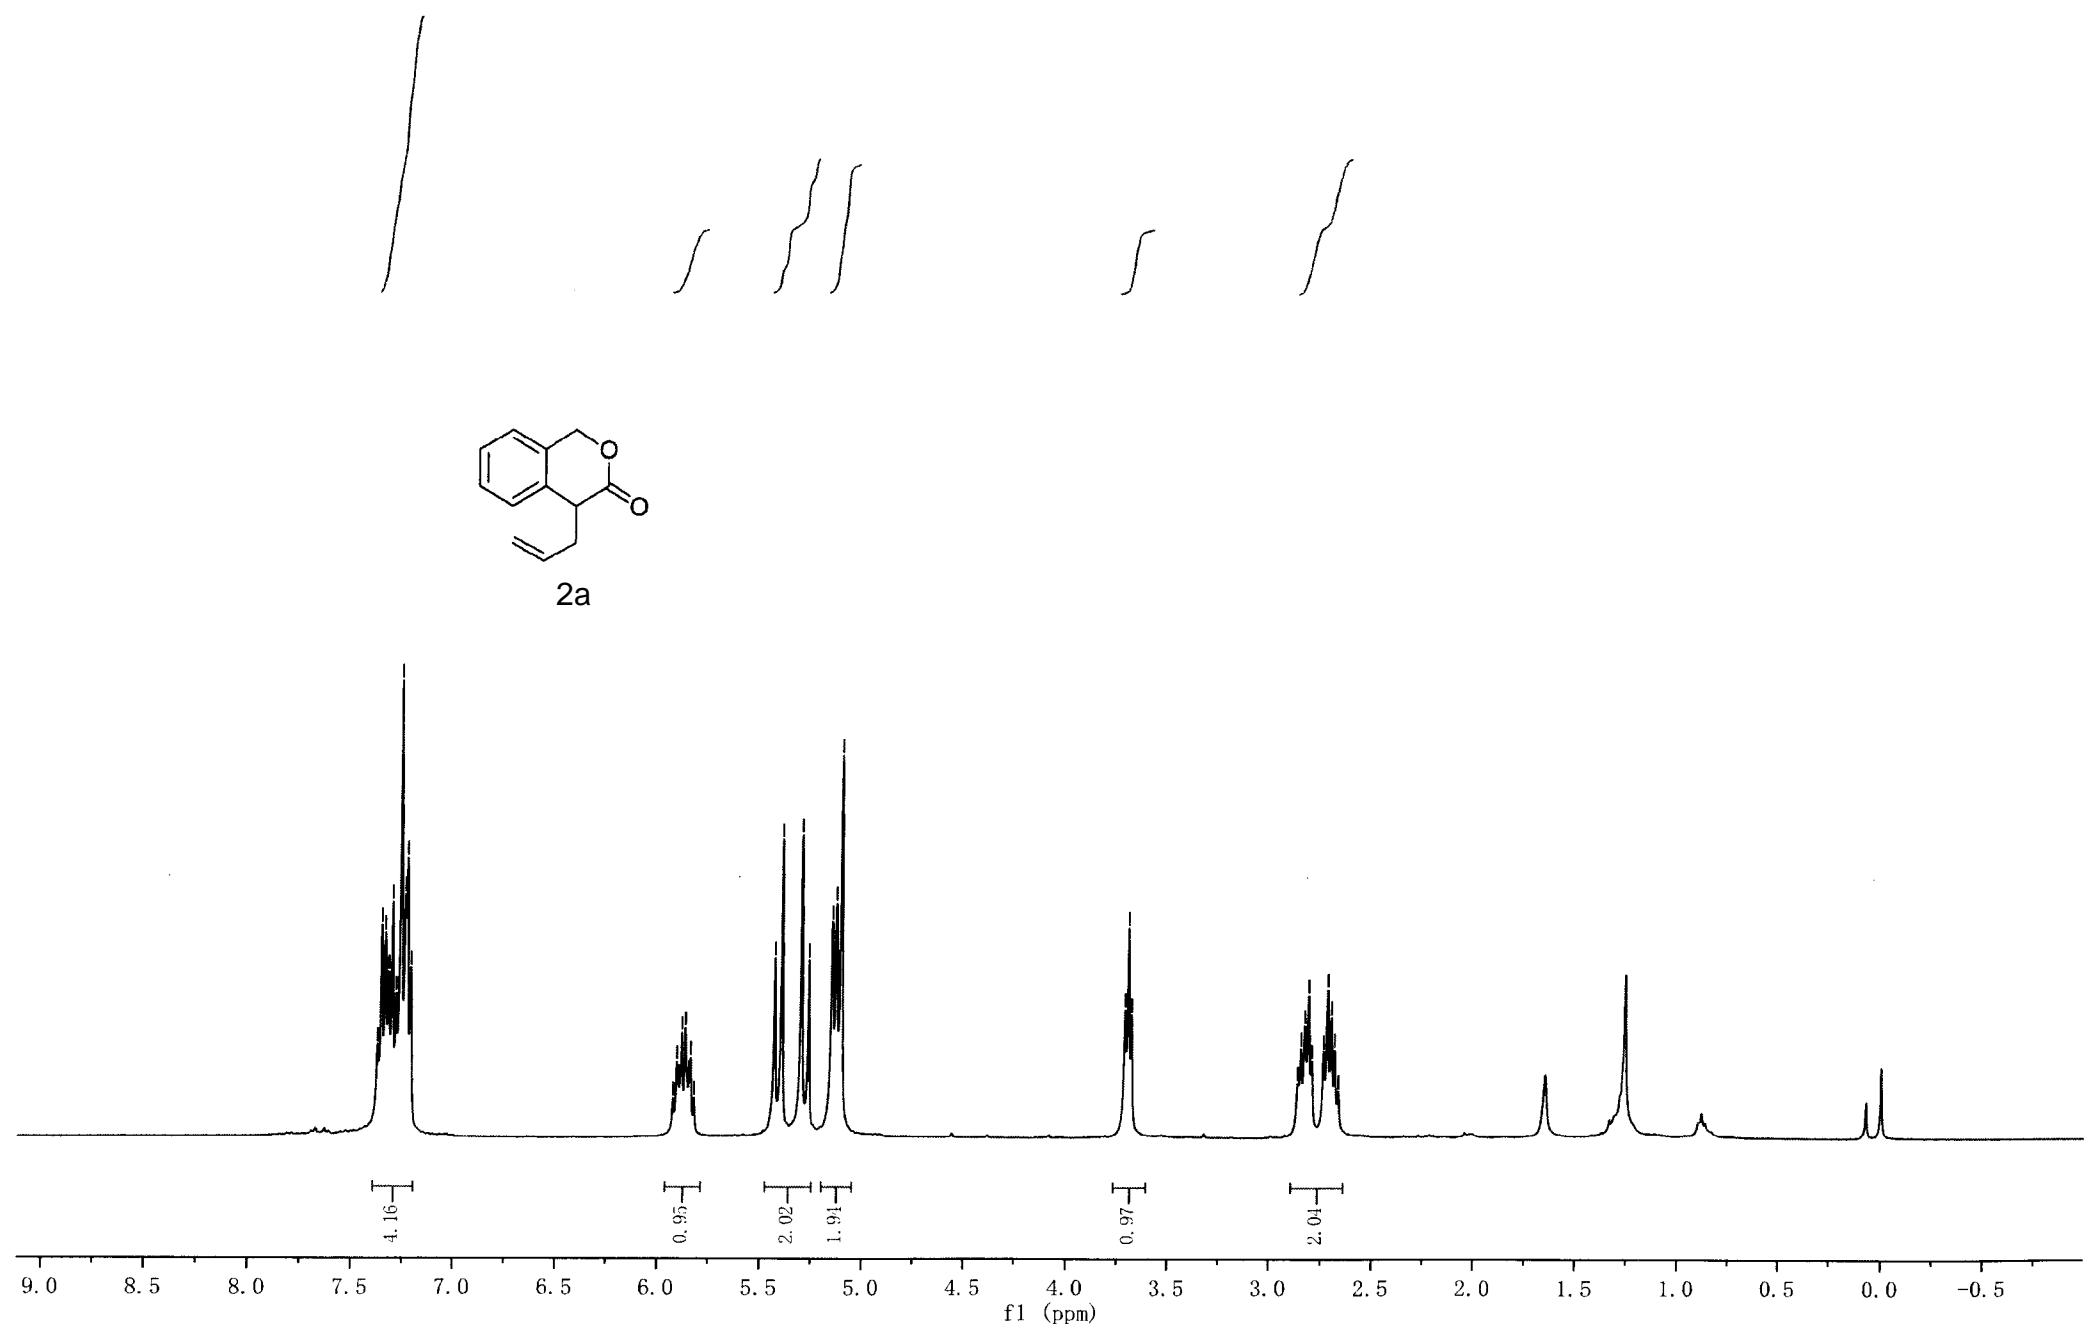

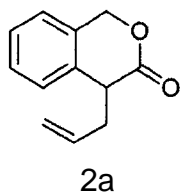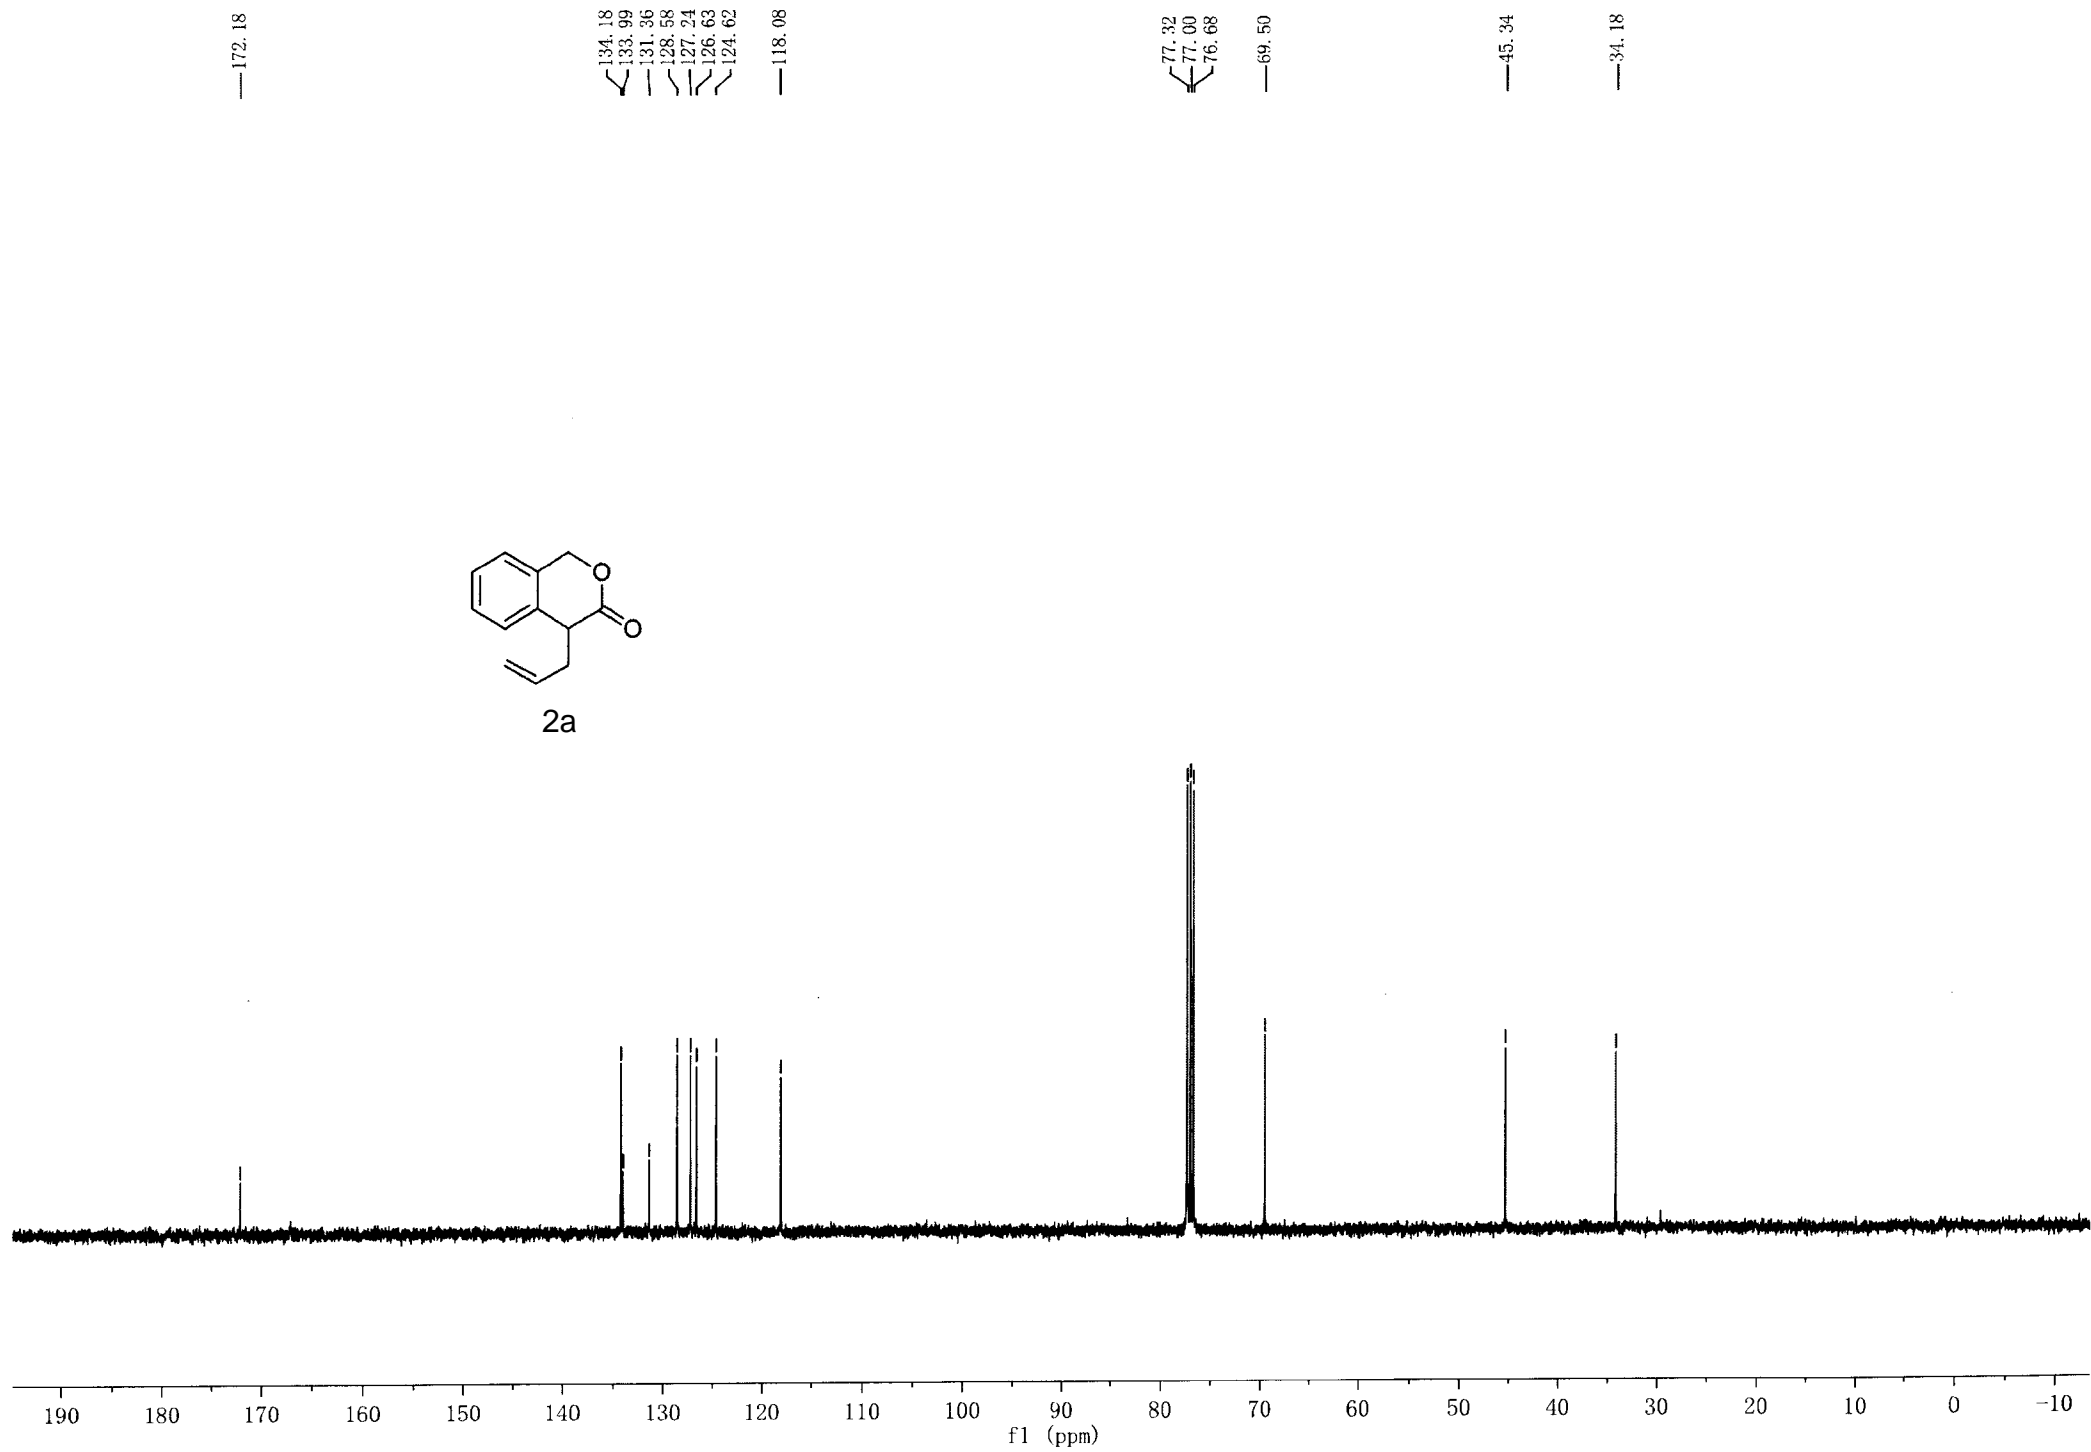

7.245  
7.231  
7.223  
7.211  
7.192  
7.189  
7.178  
7.174  
7.164  
7.160  
7.031  
7.016

5.928  
5.916  
5.908  
5.904  
5.896  
5.882  
5.873  
5.870  
5.861  
5.850  
5.129  
5.126  
5.123  
5.119  
5.095  
5.092  
5.088  
5.085  
5.055  
5.039  
5.036  
5.033  
5.030  
5.019  
5.016  
5.012  
5.010

3.361  
3.349  
3.117  
2.984

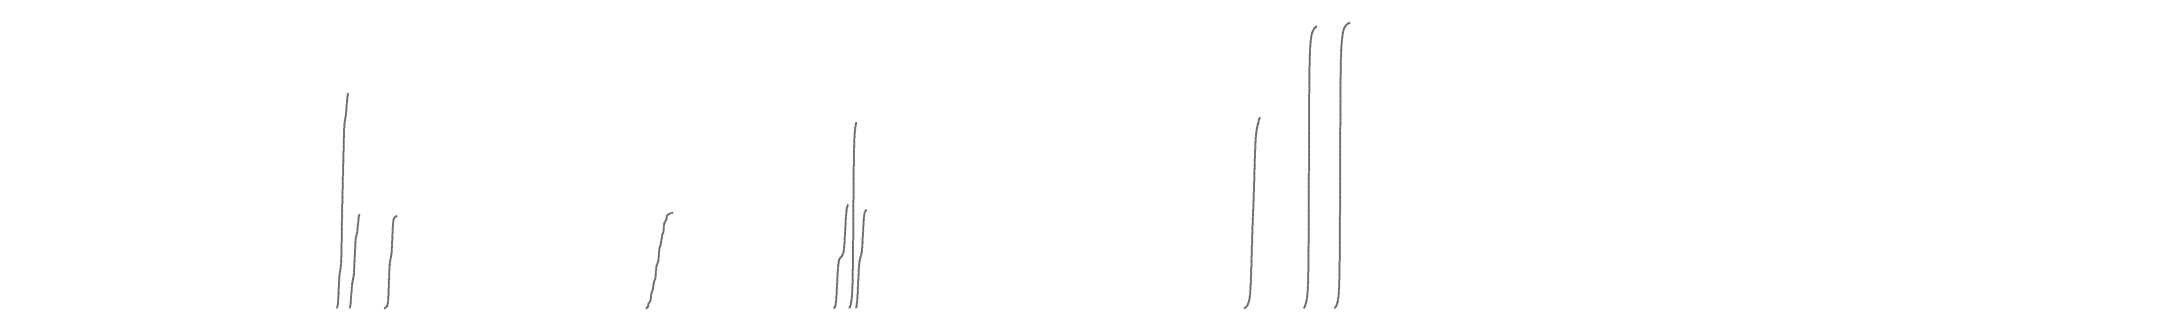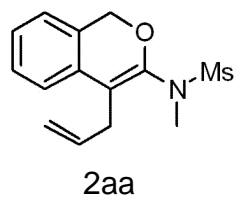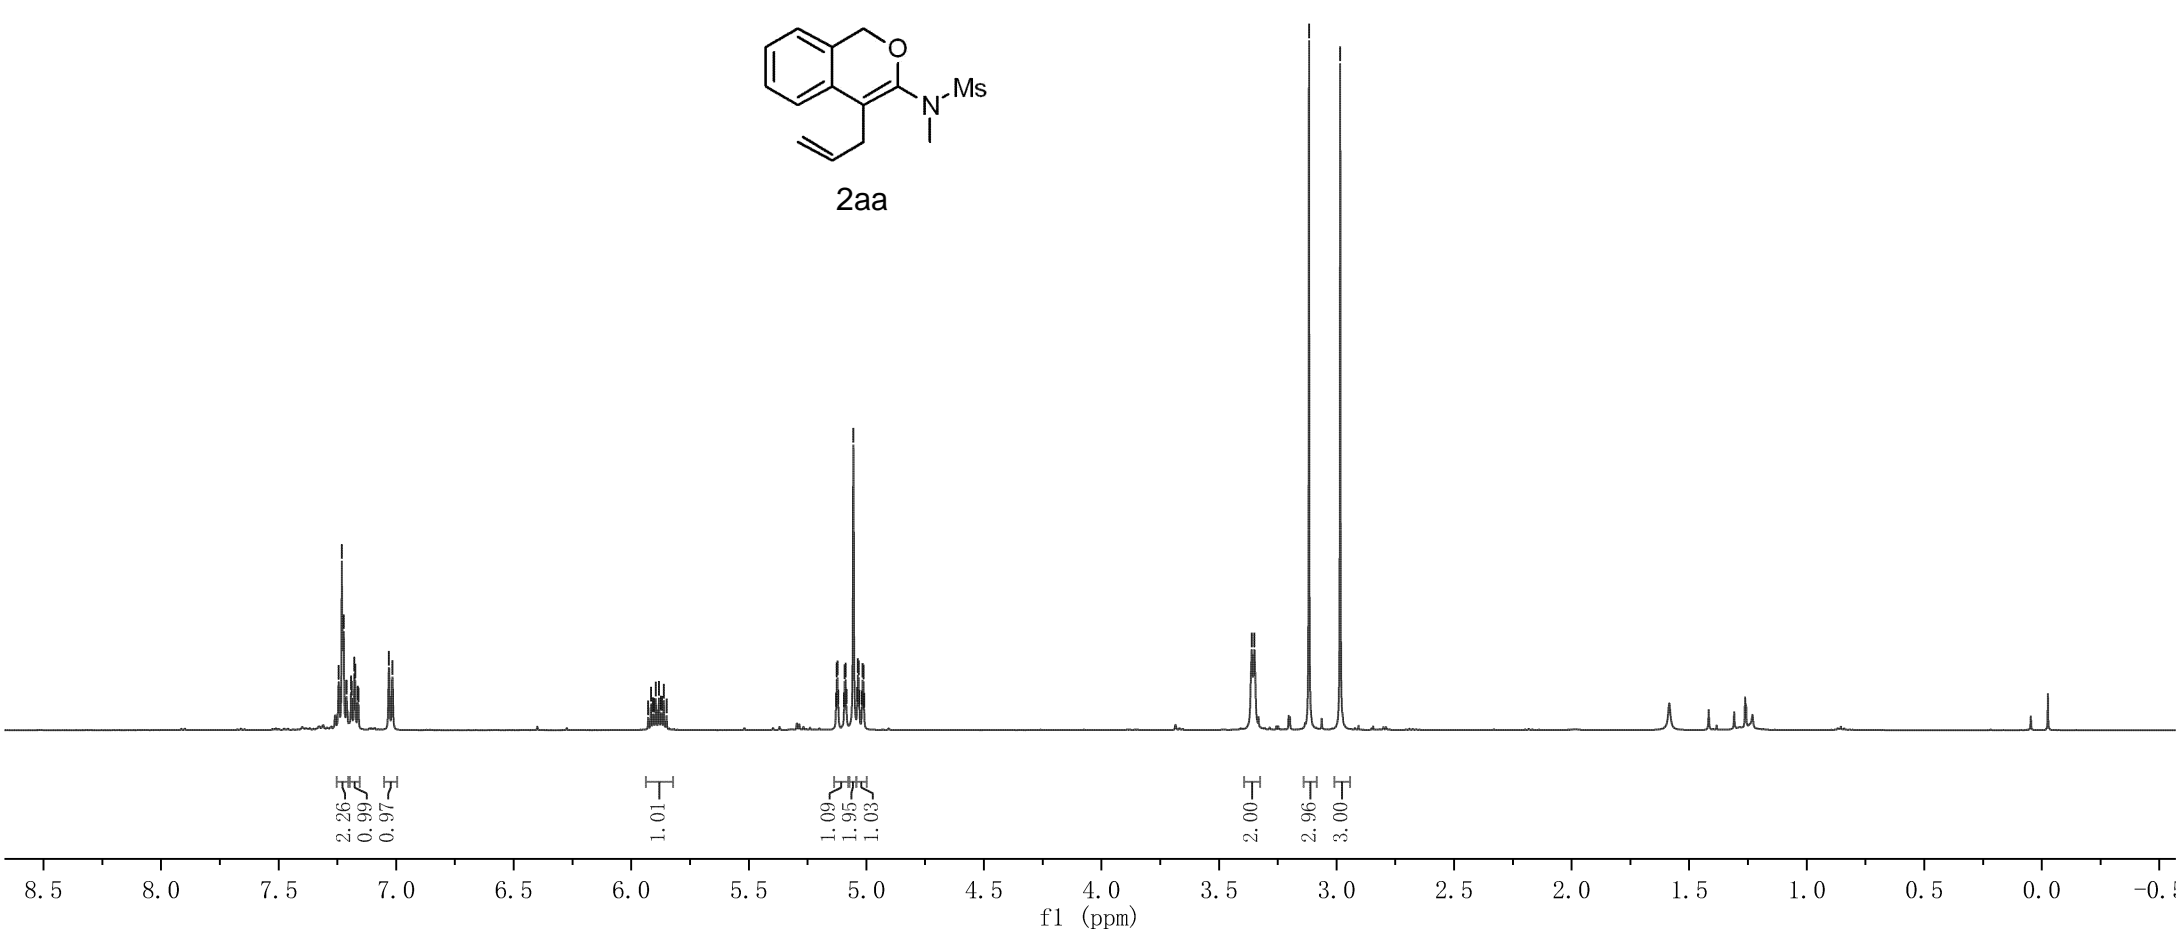

— 146.02  
— 136.06  
— 132.12  
— 128.84  
— 128.11  
— 127.12  
— 123.71  
— 122.86

— 115.97  
— 111.32

— 77.25  
— 77.00  
— 76.75  
— 69.83

— 38.36  
— 37.15  
— 30.44

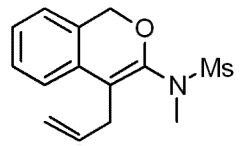

2aa

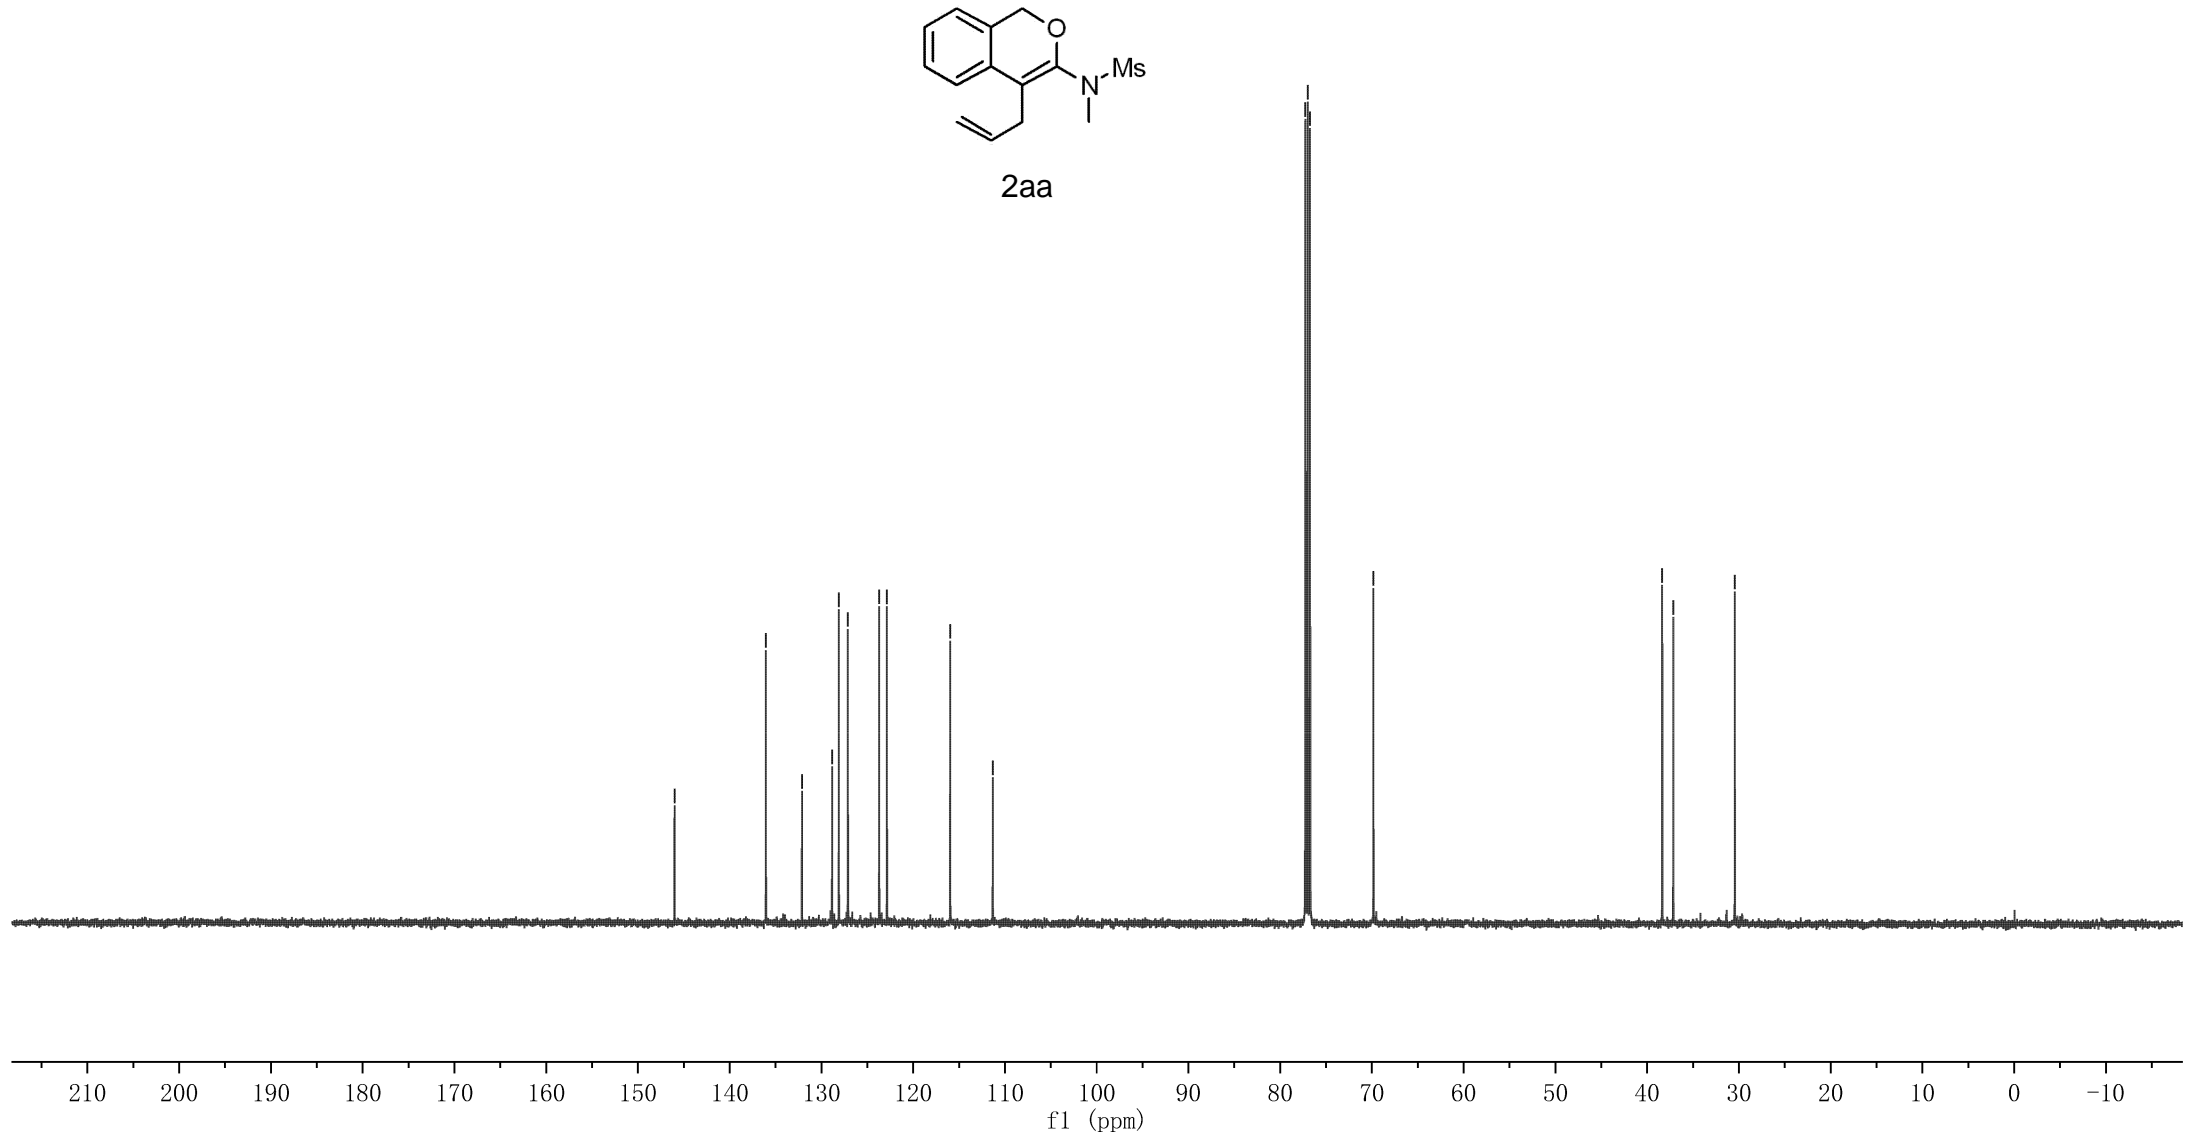

7.333  
7.325  
7.323  
7.318  
7.307  
7.300  
7.285  
7.282  
7.270  
7.267  
7.260  
7.209  
7.191  
5.924  
5.909  
5.898  
5.895  
5.883  
5.881  
5.866  
5.854  
5.852  
5.840  
5.826  
5.273  
5.269  
5.265  
5.261  
5.226  
5.222  
5.199  
5.173  
3.169  
3.153  
4.088  
3.899  
3.896  
3.893  
3.884  
3.881  
3.878  
3.286  
3.220

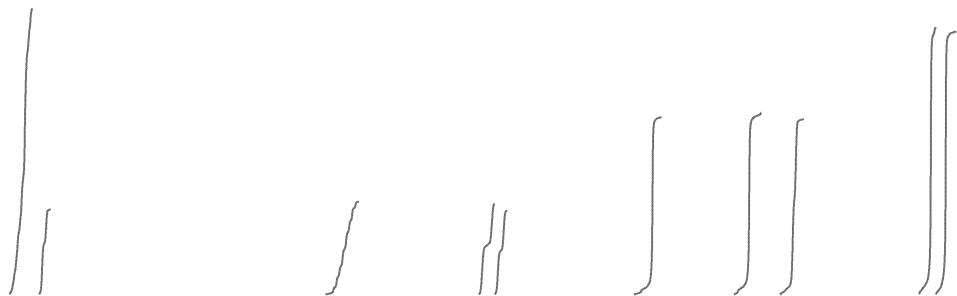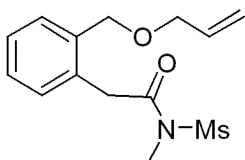

2ab

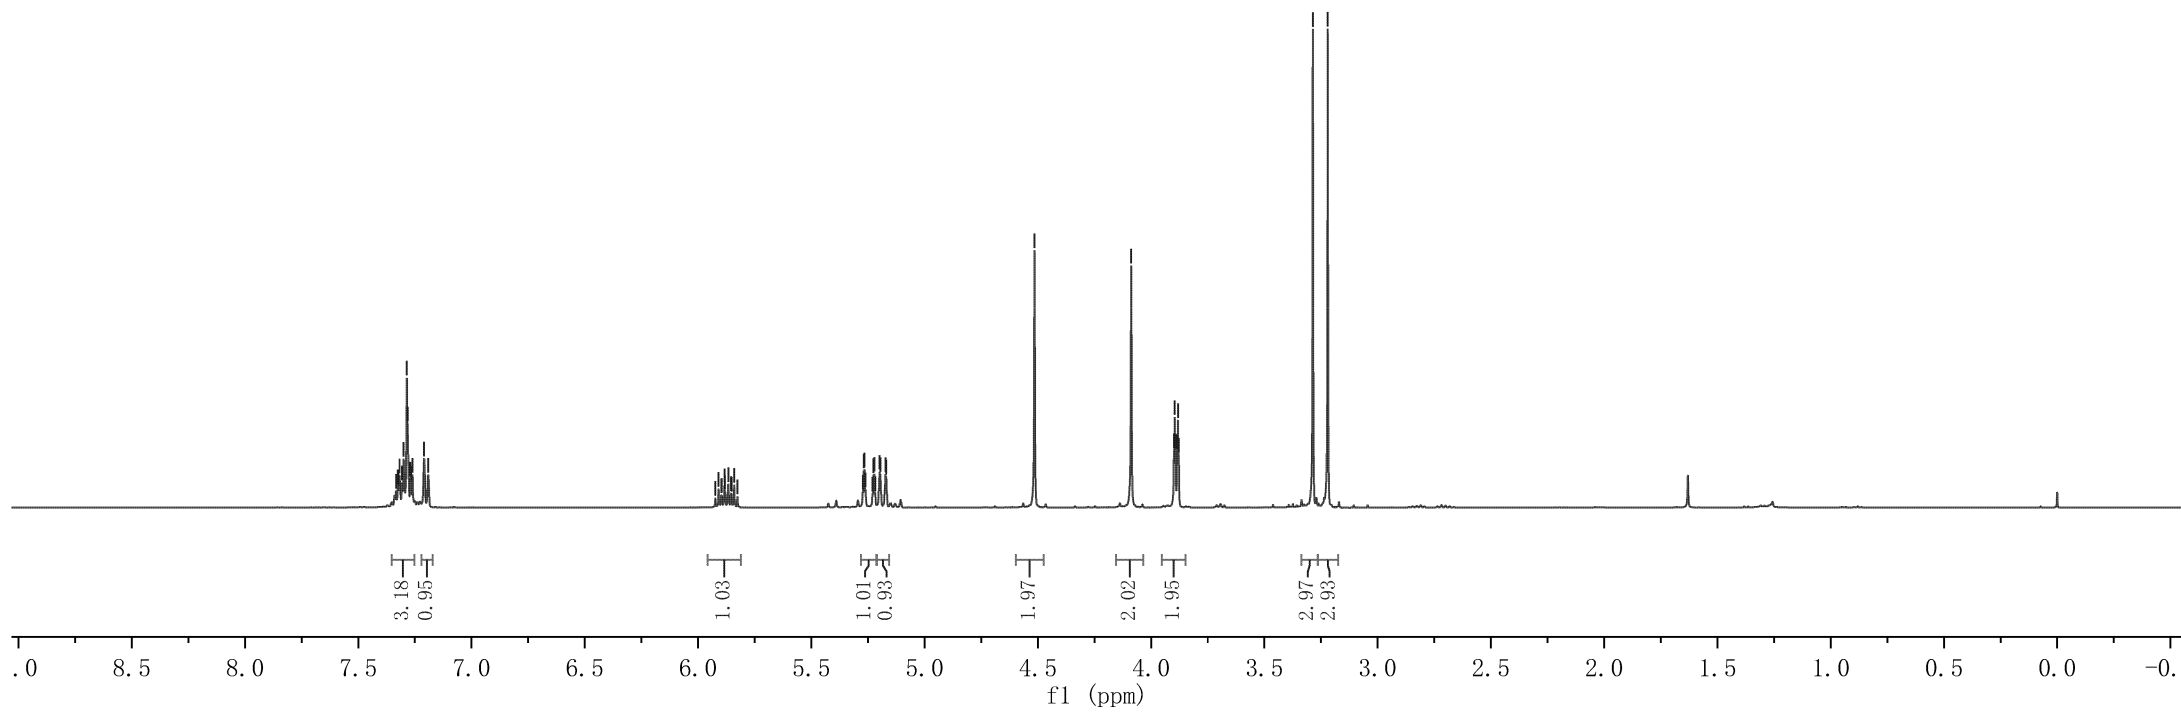

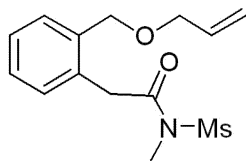

2ab

—171.88

136.00  
134.39  
133.01  
130.85  
130.00  
128.52  
127.41  
—117.46

77.32  
77.00  
76.68  
71.17  
70.70

41.33  
40.42  
—32.64

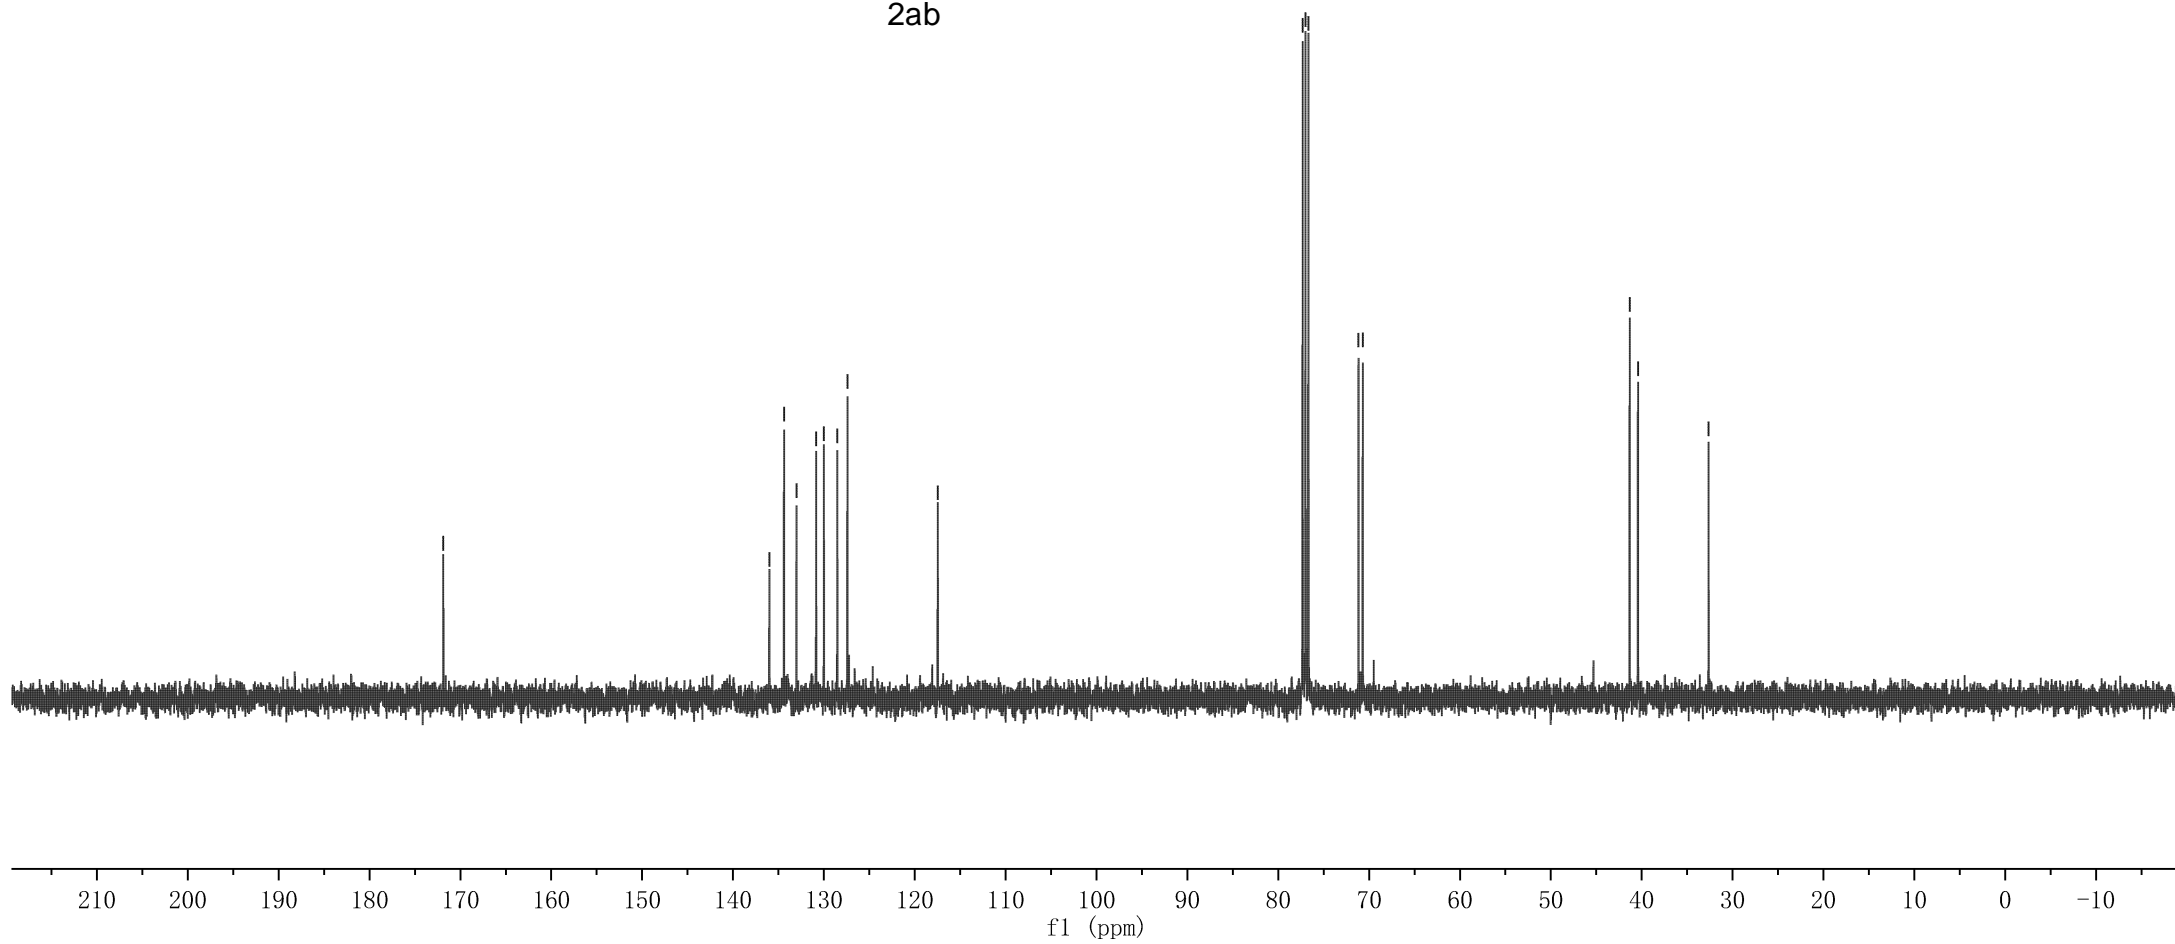

7.231  
7.217  
7.210  
7.197  
7.063  
7.045  
7.042  
7.025  
6.961  
6.941

5.889  
5.872  
5.847  
5.829  
5.804  
5.787  
5.397  
5.361  
5.298  
5.266  
5.230  
5.133  
5.105  
5.093

3.699  
3.683  
3.666

2.840  
2.825  
2.806  
2.789  
2.774  
2.710  
2.692  
2.674  
2.656  
2.637

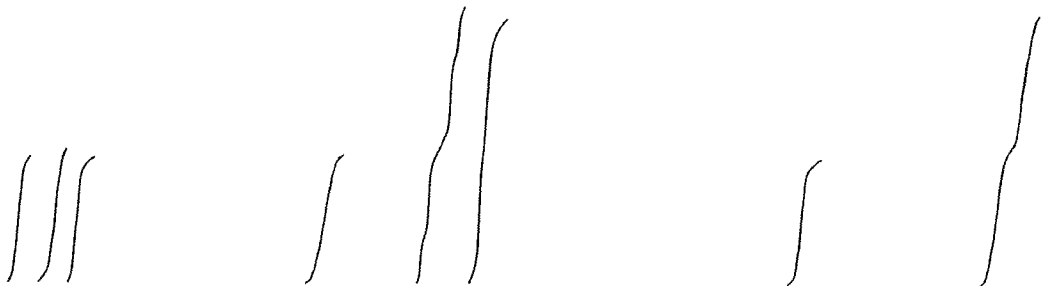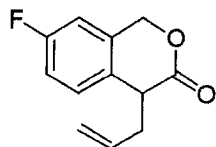

2d

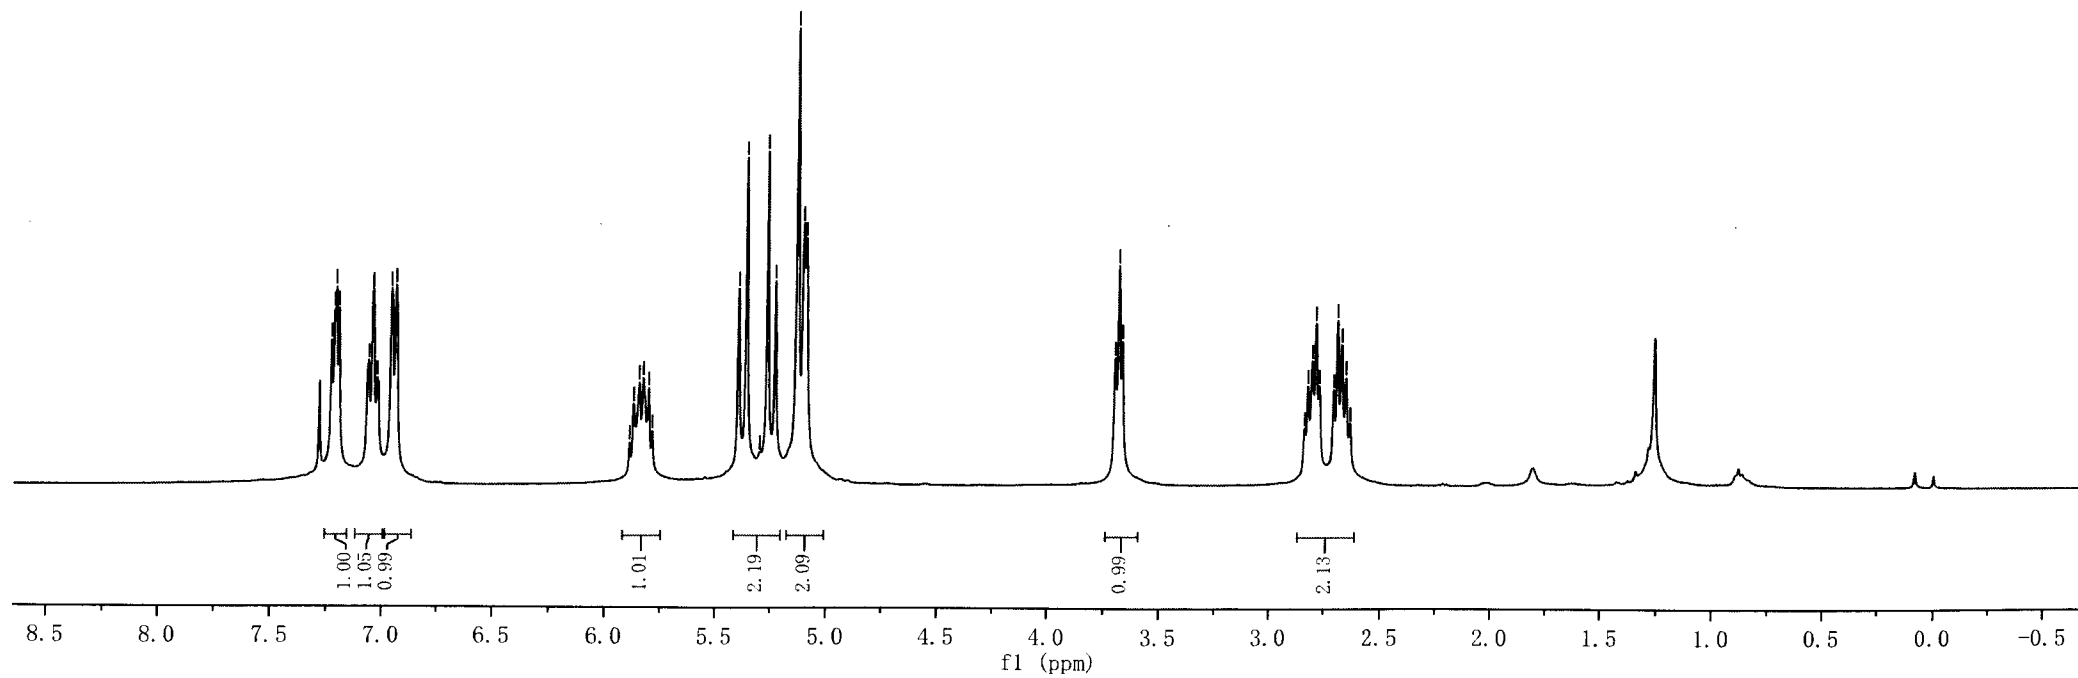

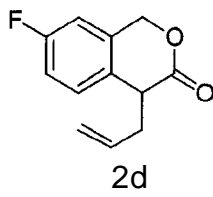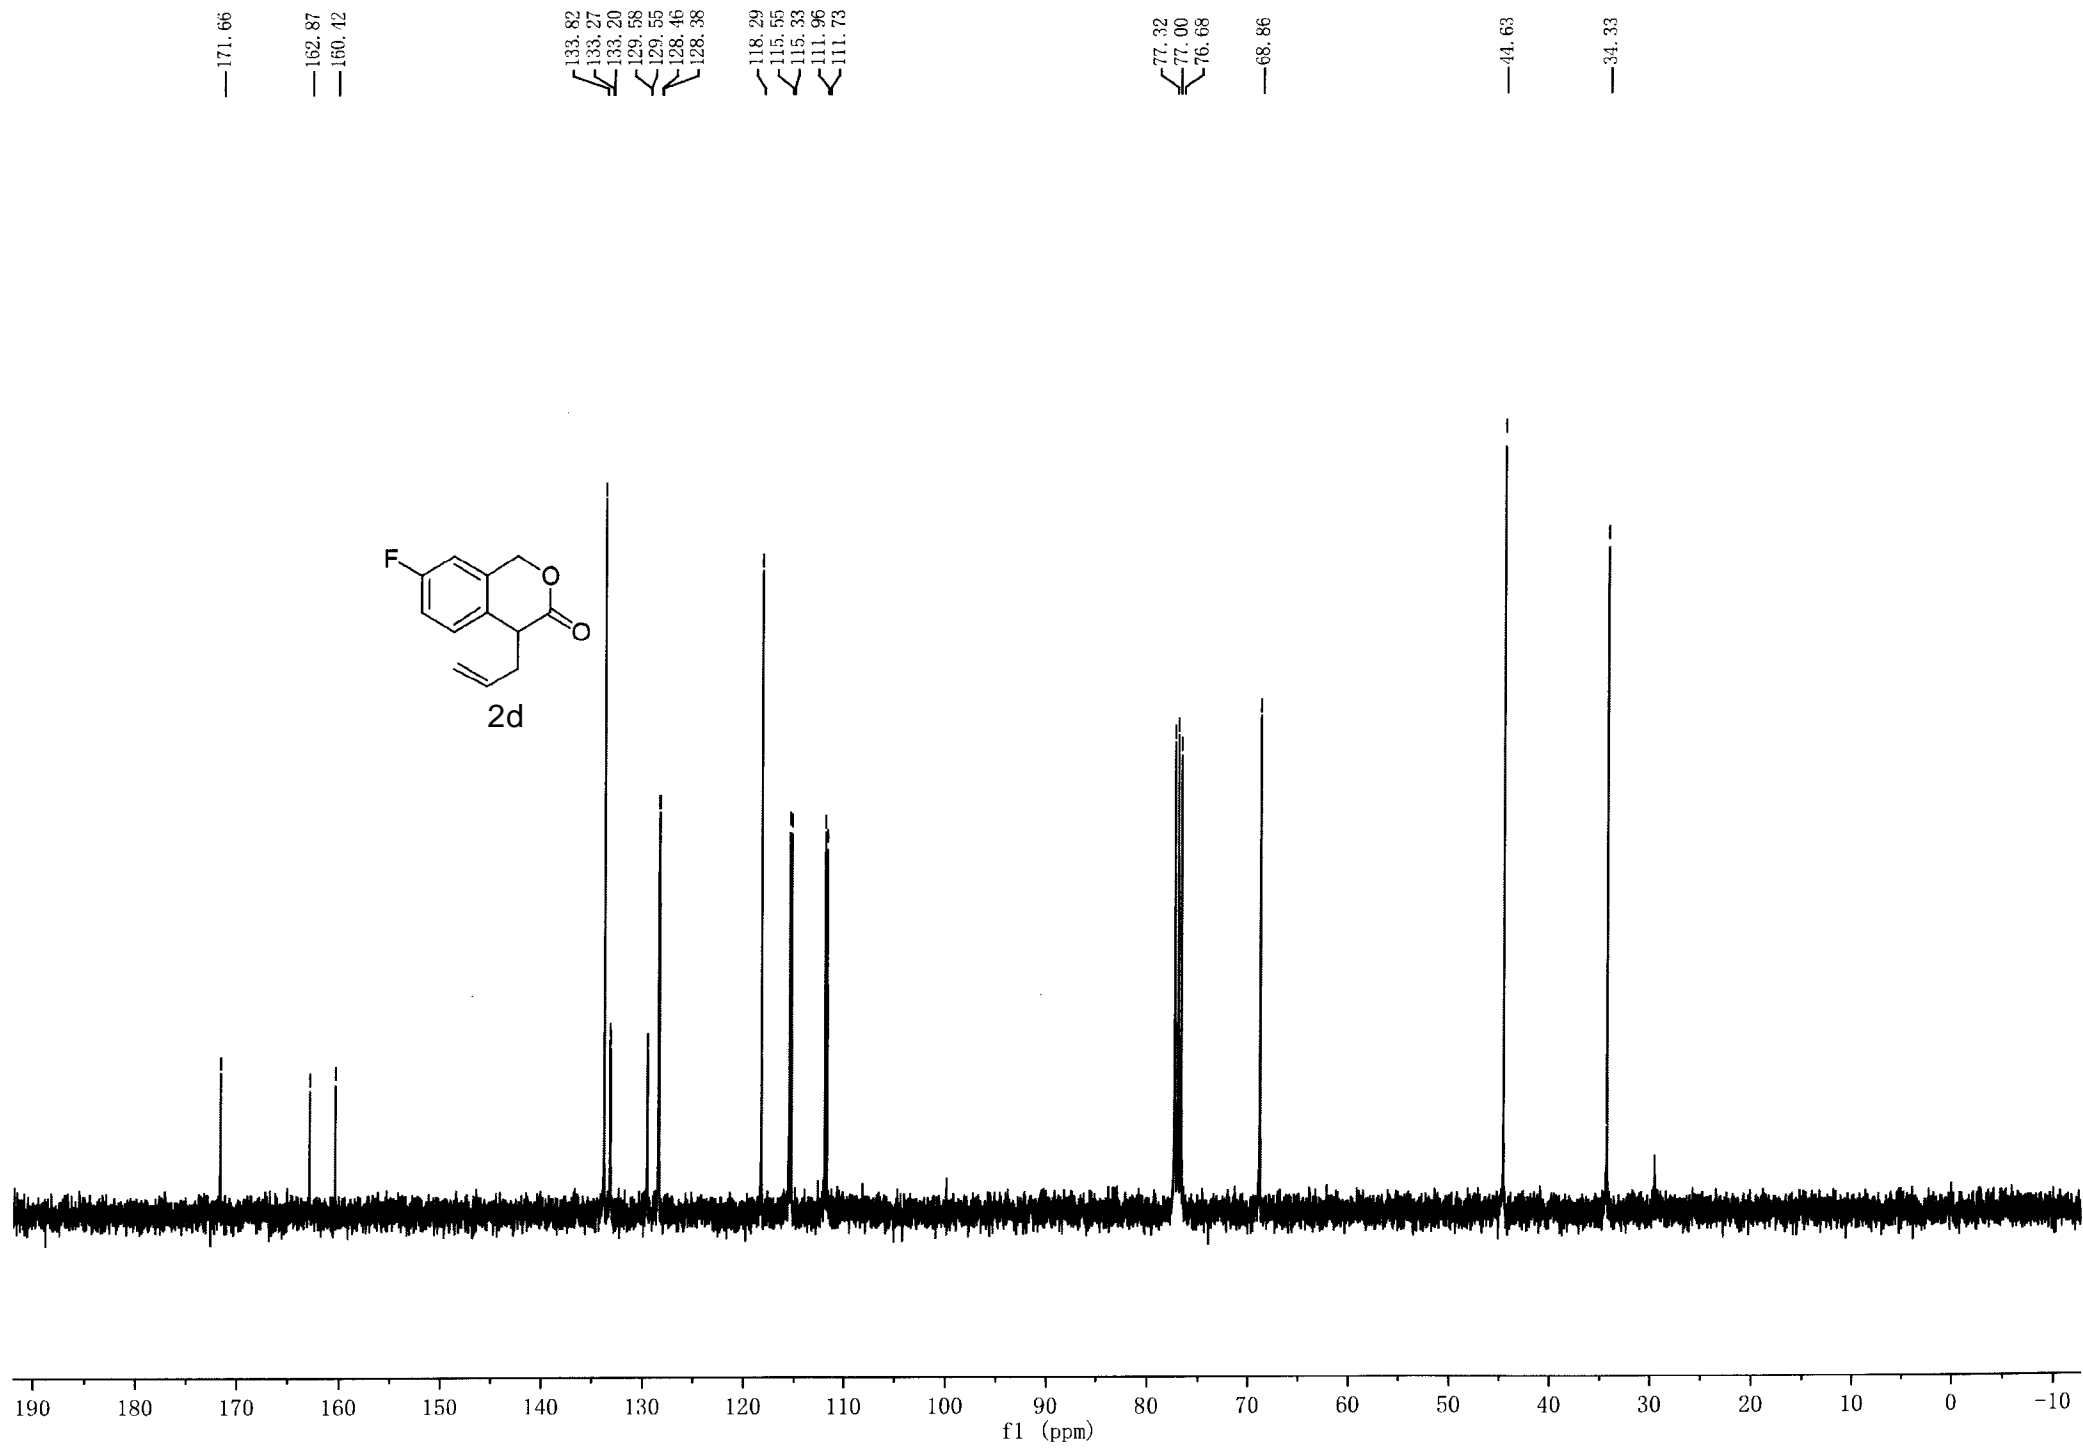



7.473  
7.454  
7.372  
7.128  
7.108

5.857  
5.834  
5.817  
5.797

5.375  
5.340  
5.251  
5.215  
5.131  
5.104

3.663  
3.650

2.818  
2.798  
2.784  
2.685  
2.668  
2.651

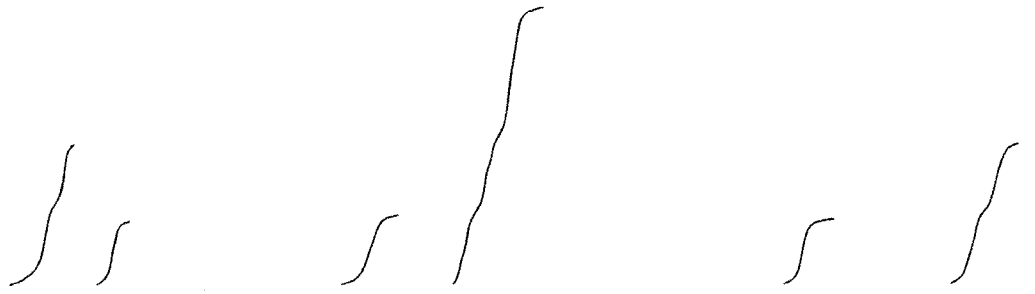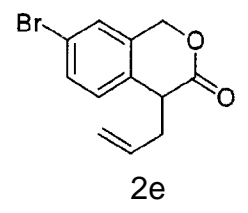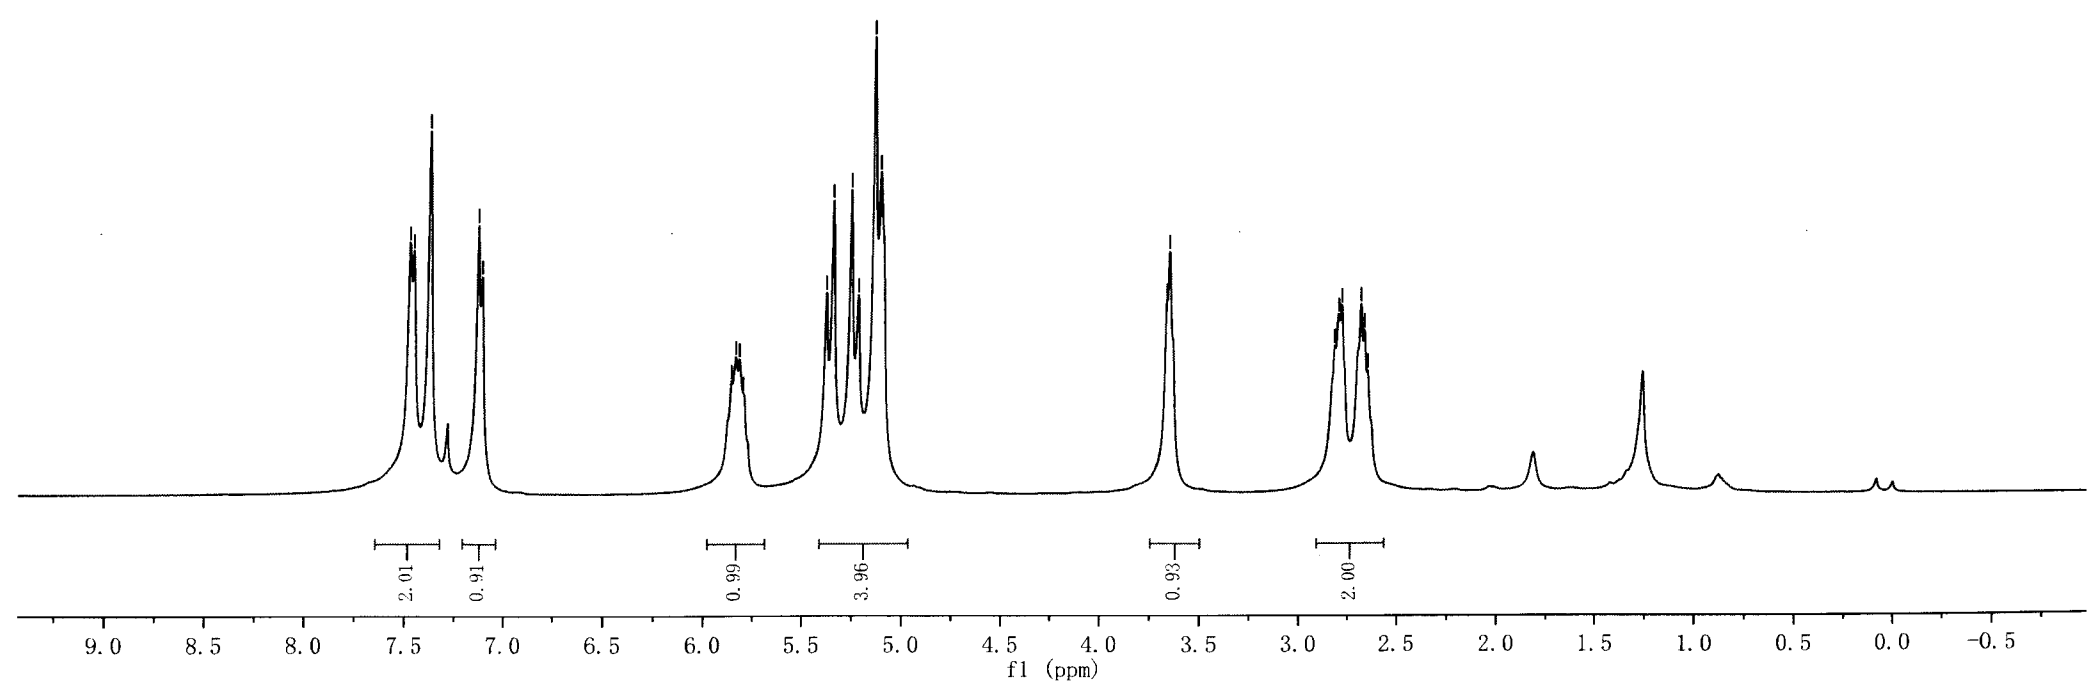

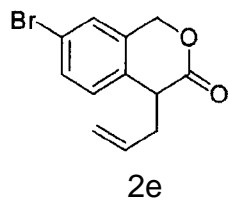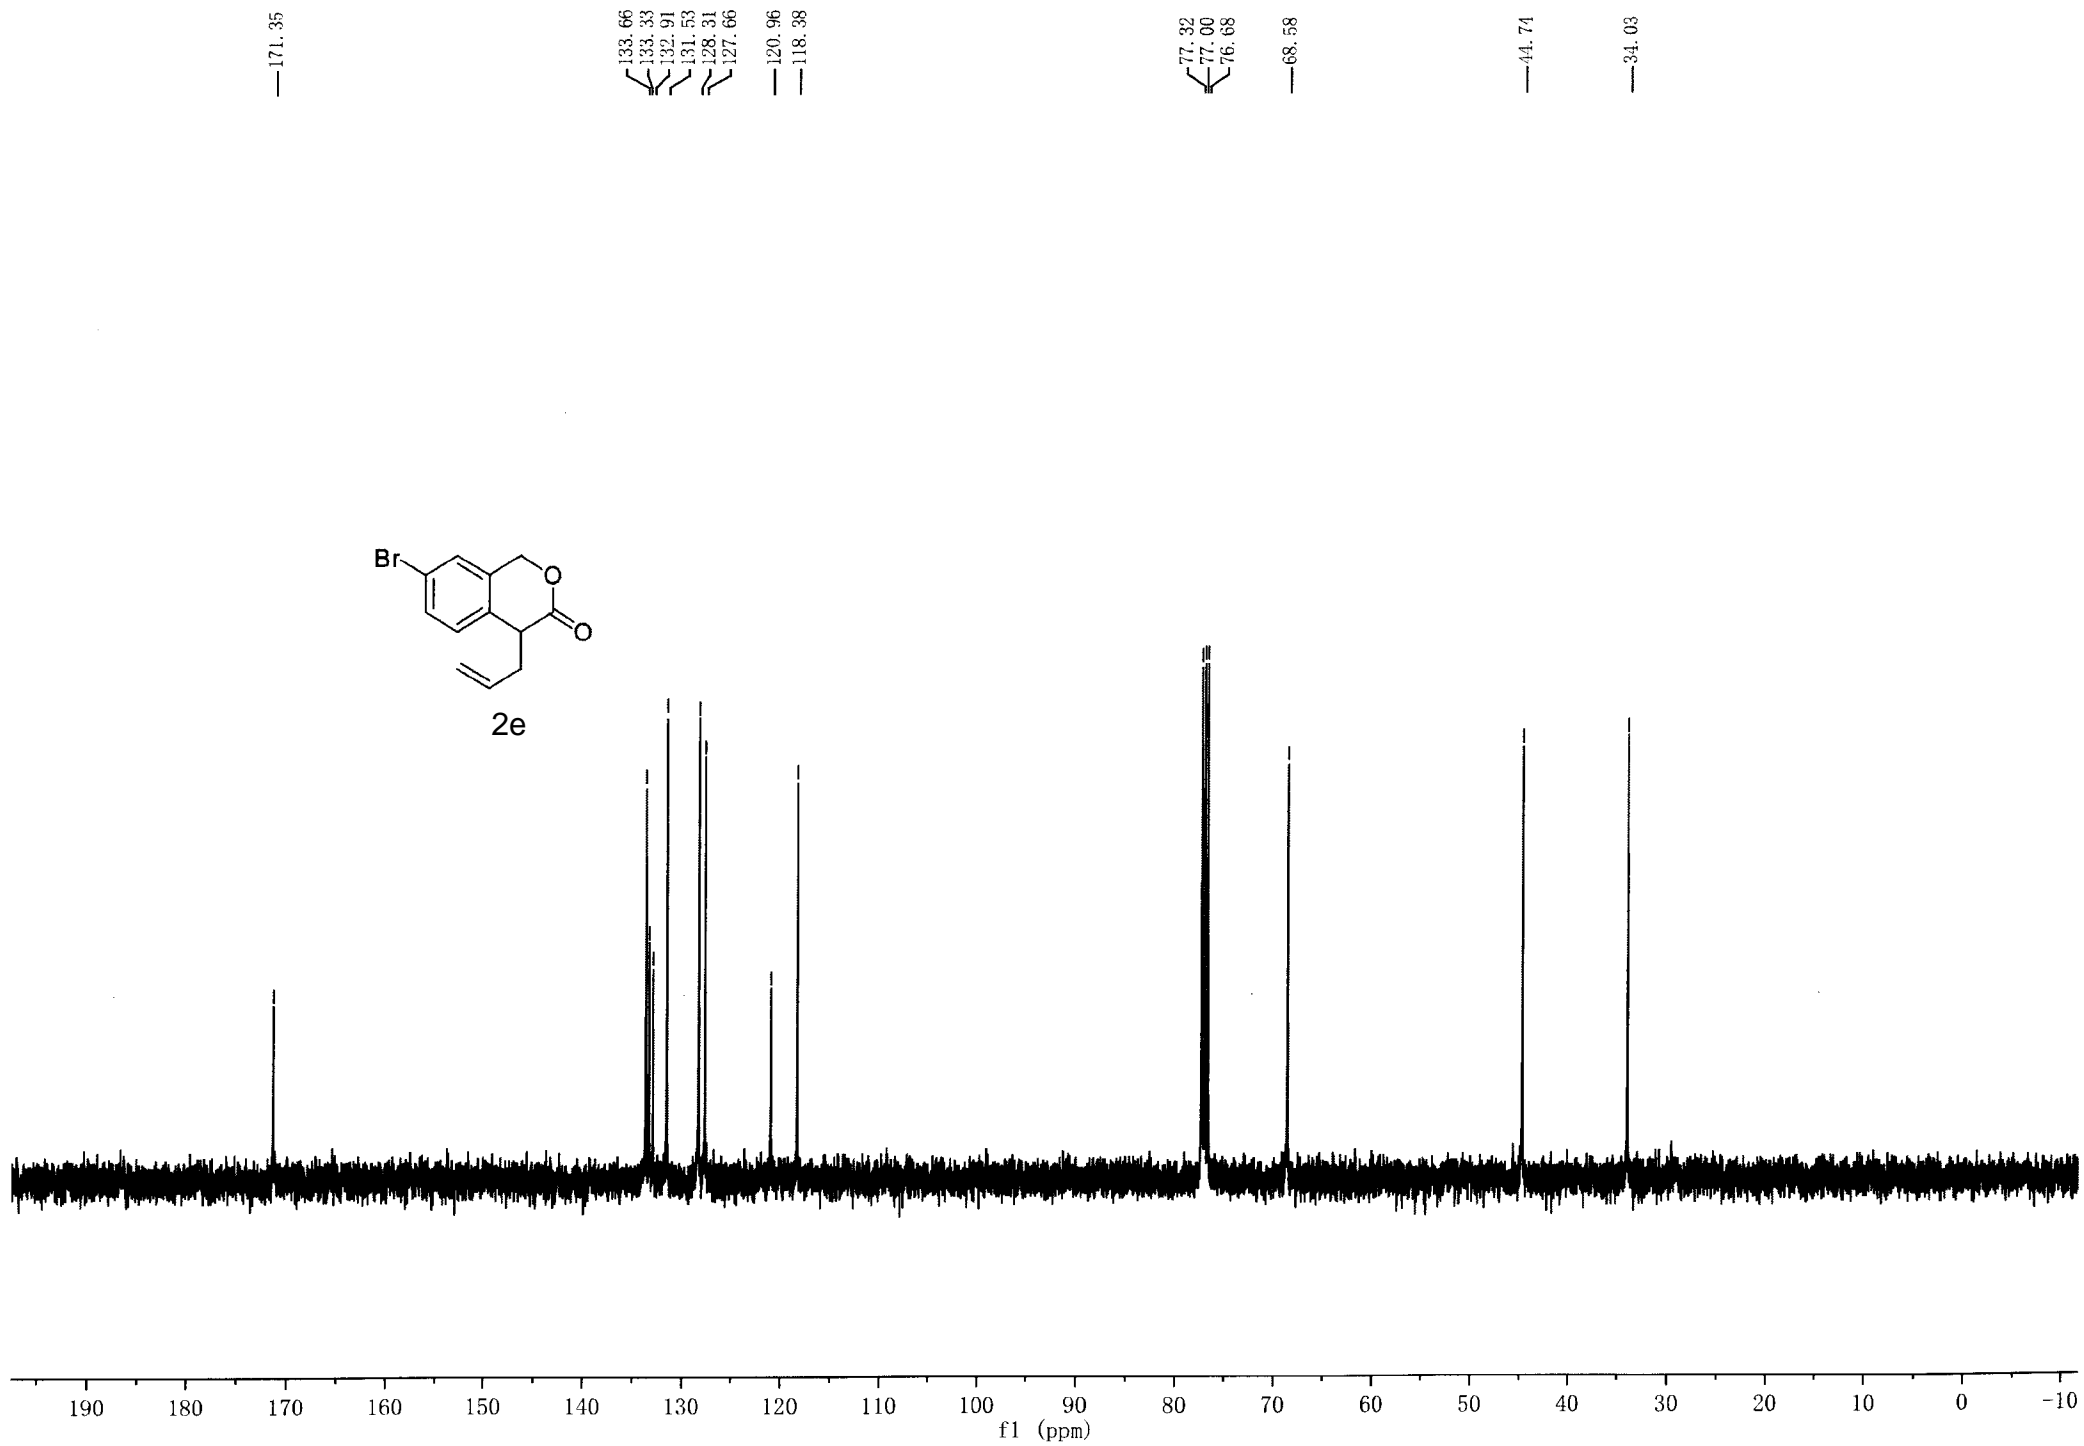

7.657  
7.638  
7.522  
7.419  
7.399  
7.284

5.916  
5.899  
5.890  
5.881  
5.873  
5.856  
5.848  
5.840  
5.831  
5.813  
5.495  
5.459  
5.375  
5.339  
5.179  
5.175  
5.172  
5.156  
5.153  
5.133  
5.129

3.800  
3.784  
3.767

2.920  
2.905  
2.884  
2.868  
2.853  
2.785  
2.766  
2.748  
2.730  
2.712

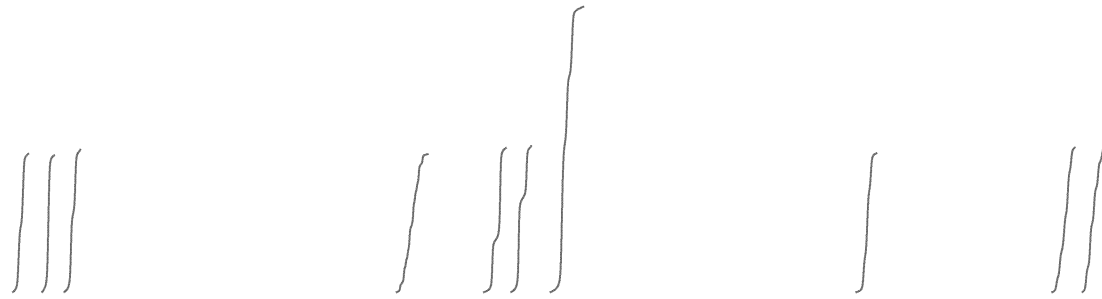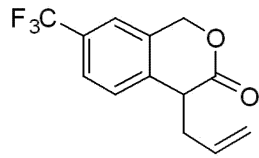

2f

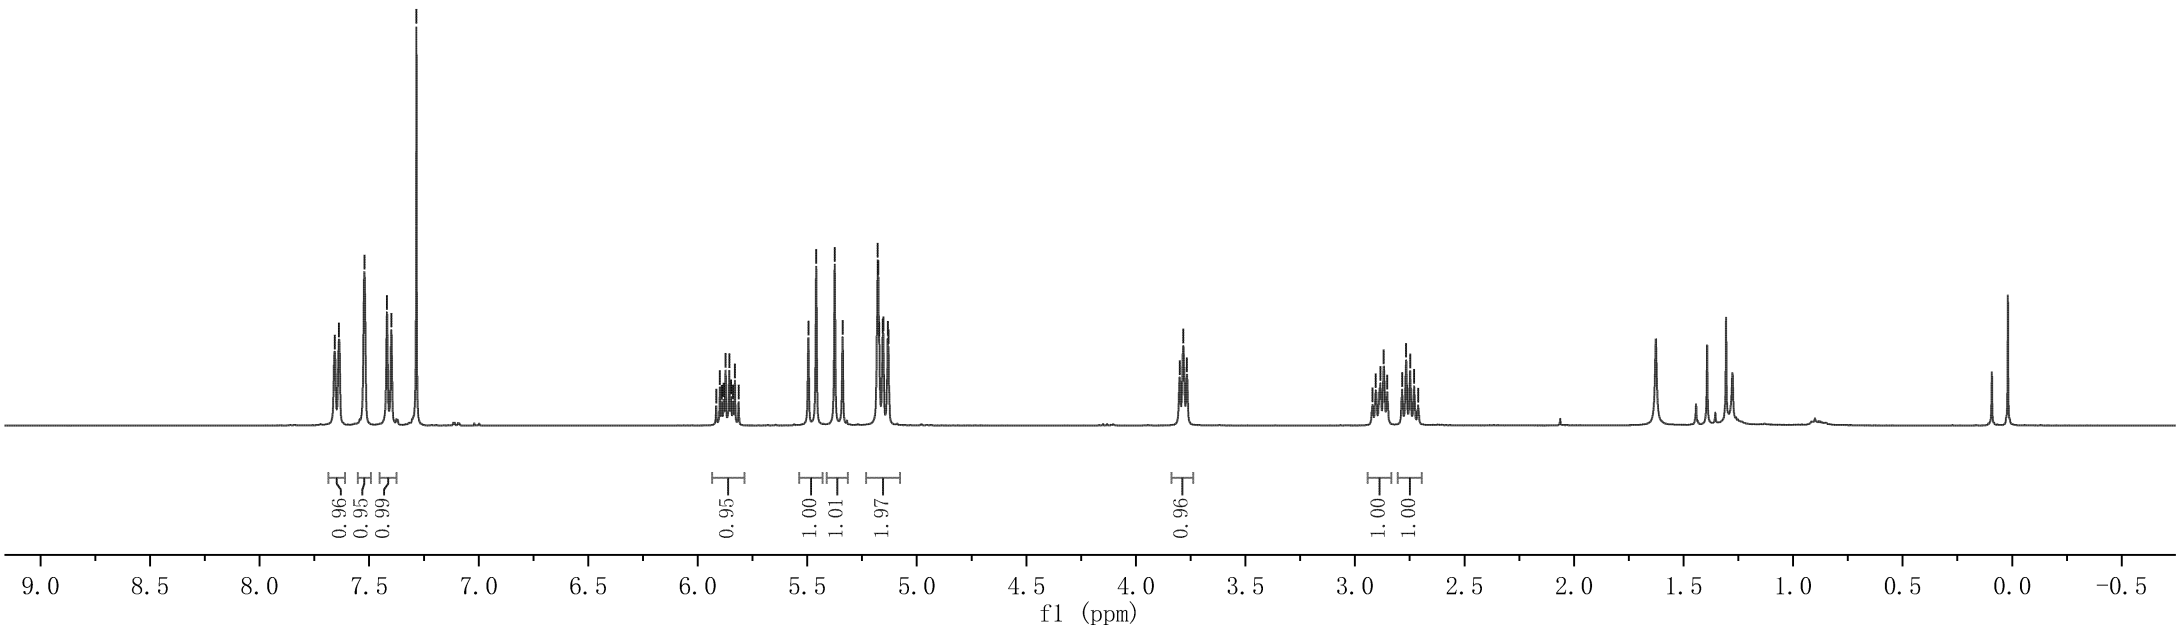

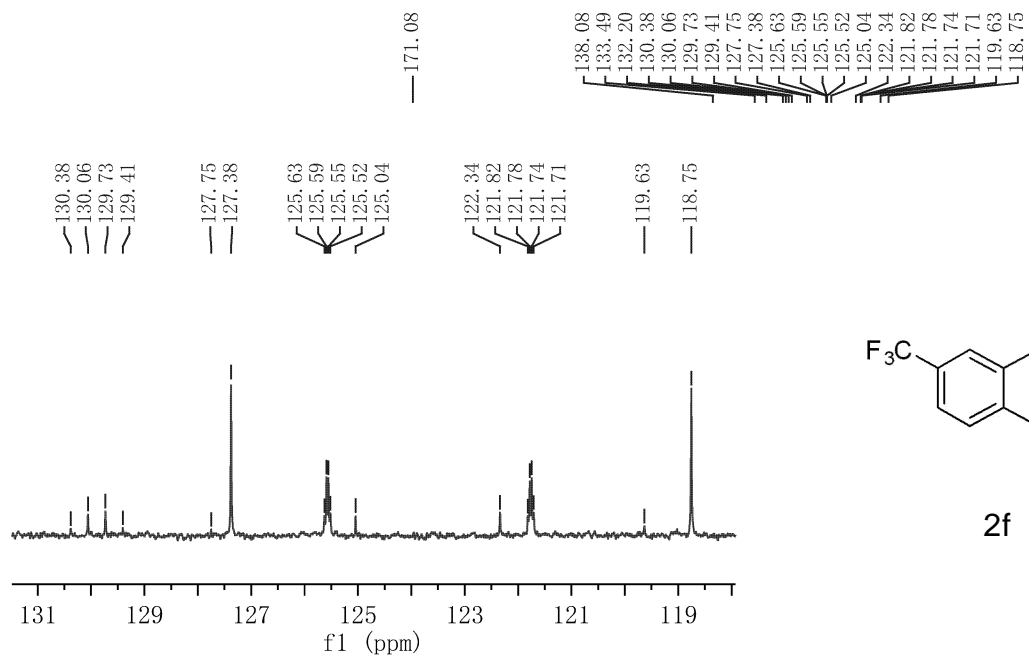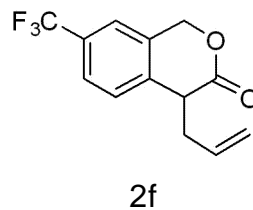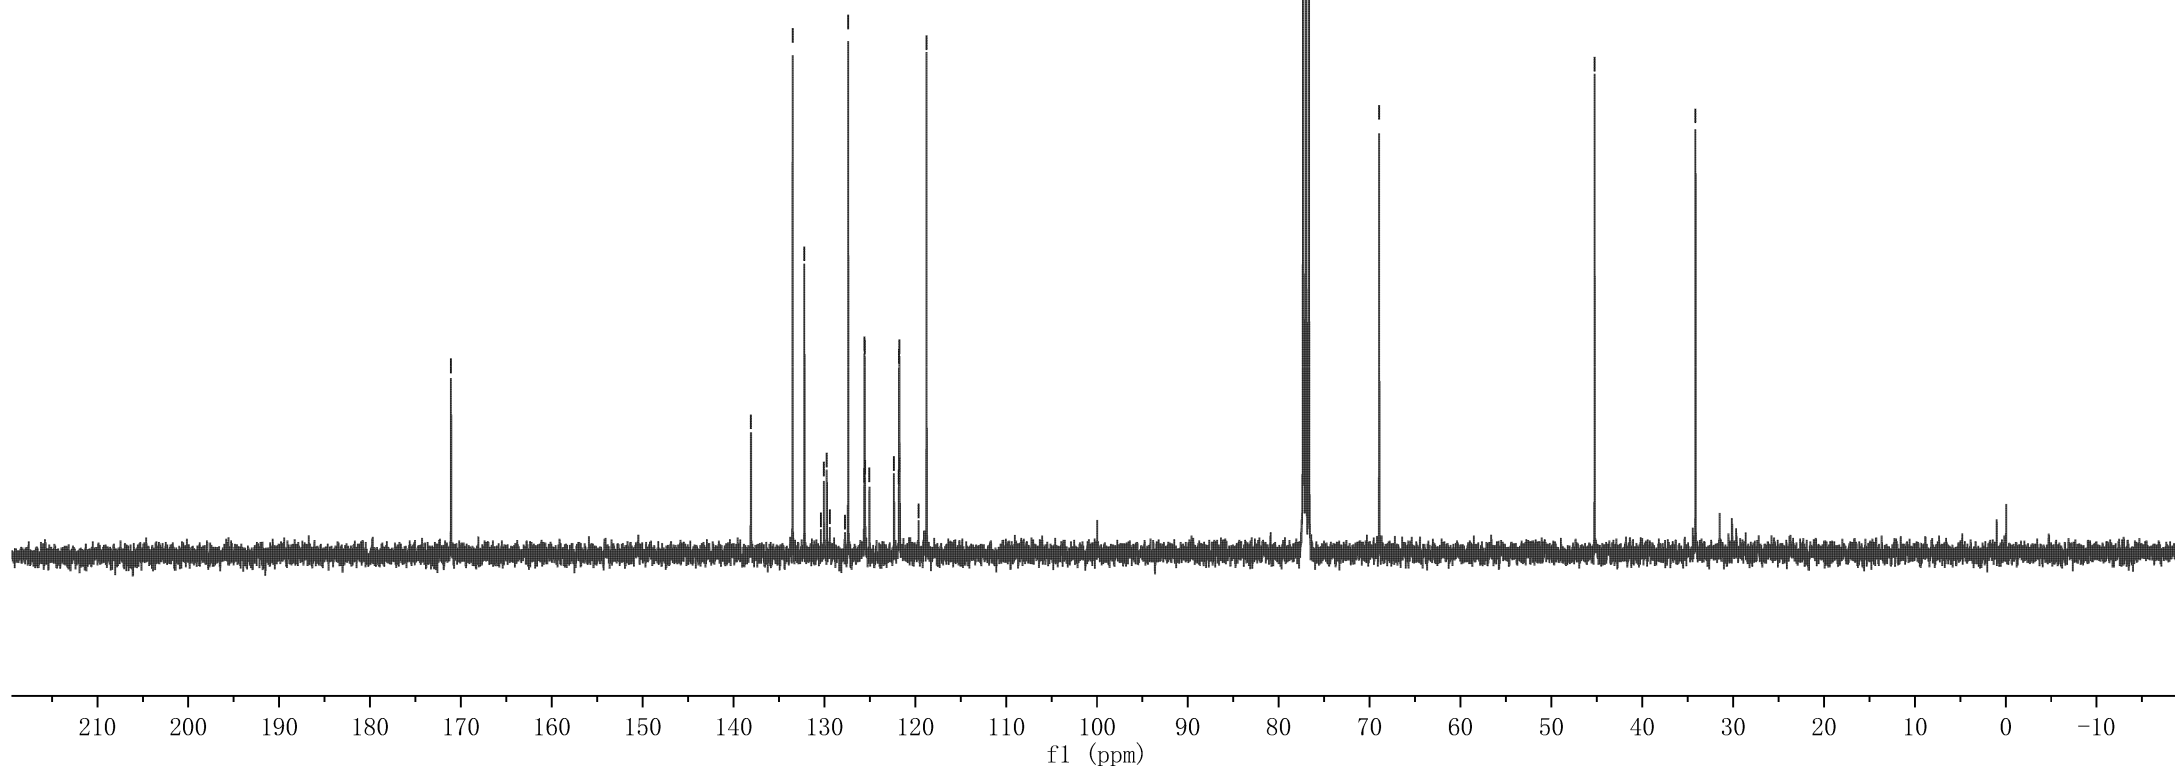

7.158  
7.138  
7.128  
7.109  
7.022

5.909  
5.892  
5.884  
5.867  
5.849  
5.842  
5.832  
5.824  
5.807  
5.379  
5.344  
5.246  
5.211  
5.137  
5.113  
5.090

3.667  
3.650  
3.634

2.829  
2.814  
2.794  
2.778  
2.762  
2.707  
2.689  
2.671  
2.653  
2.635  
2.351

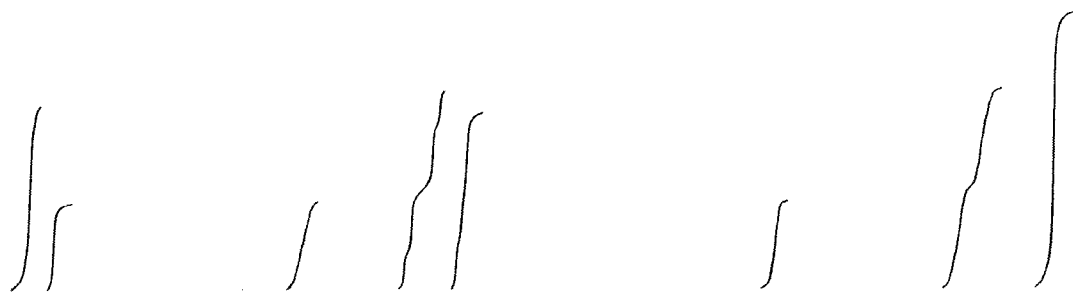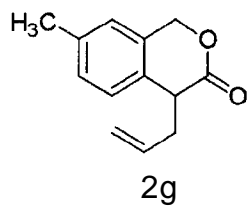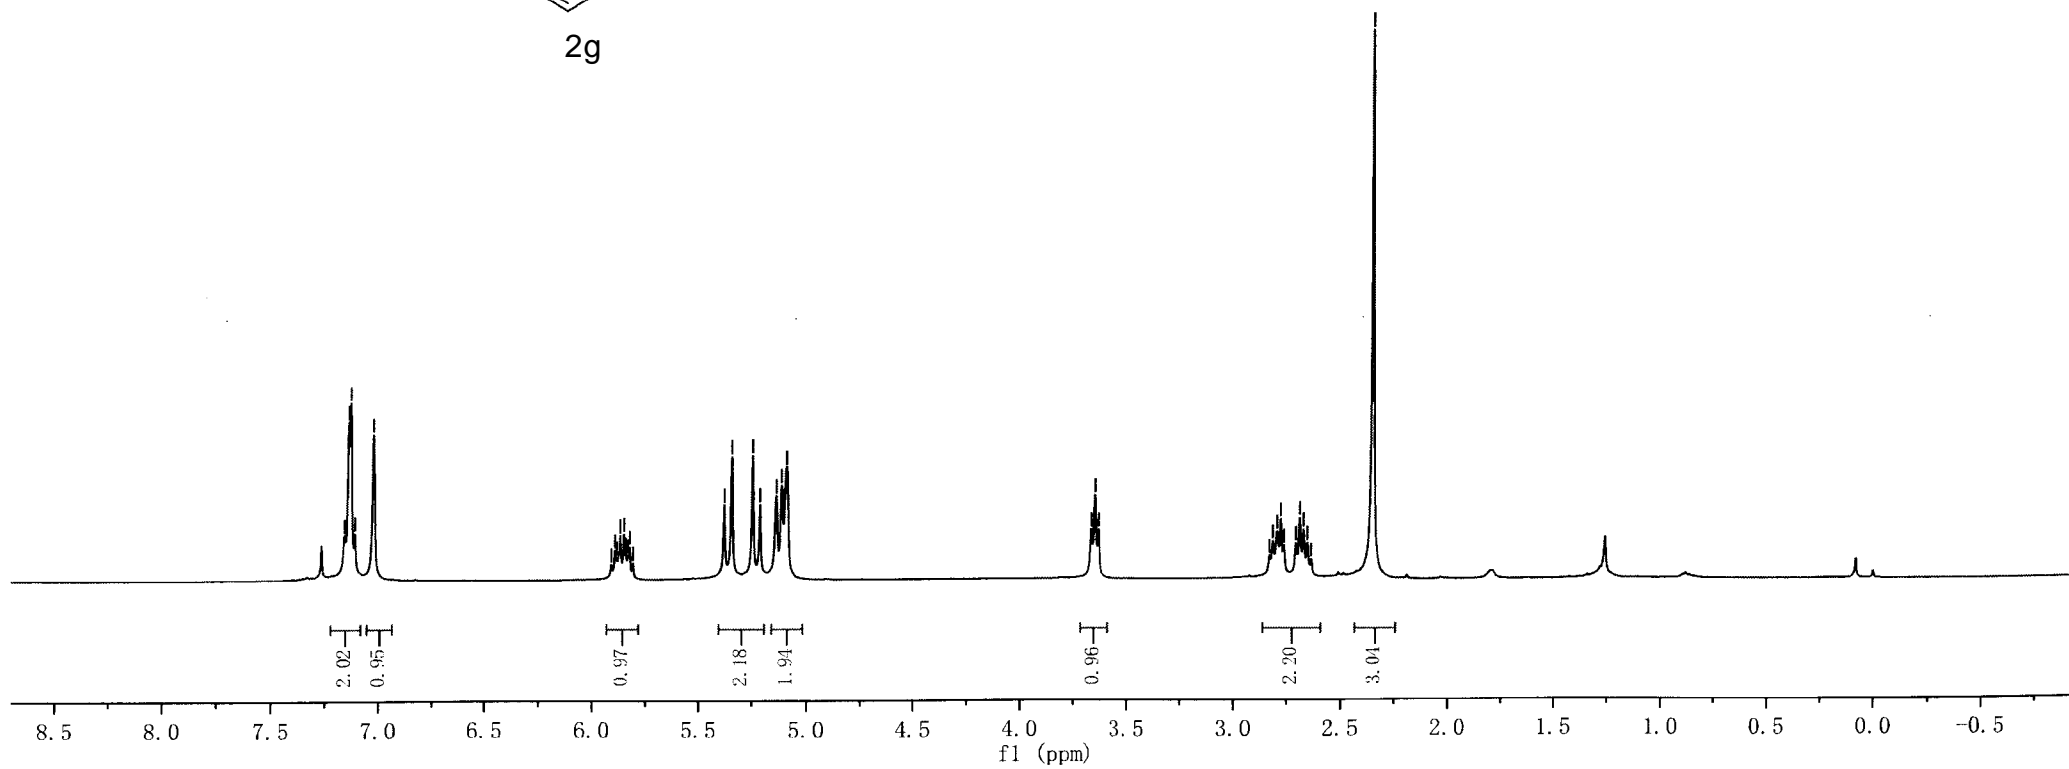

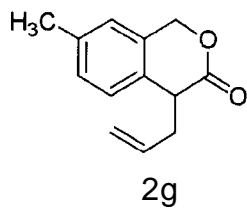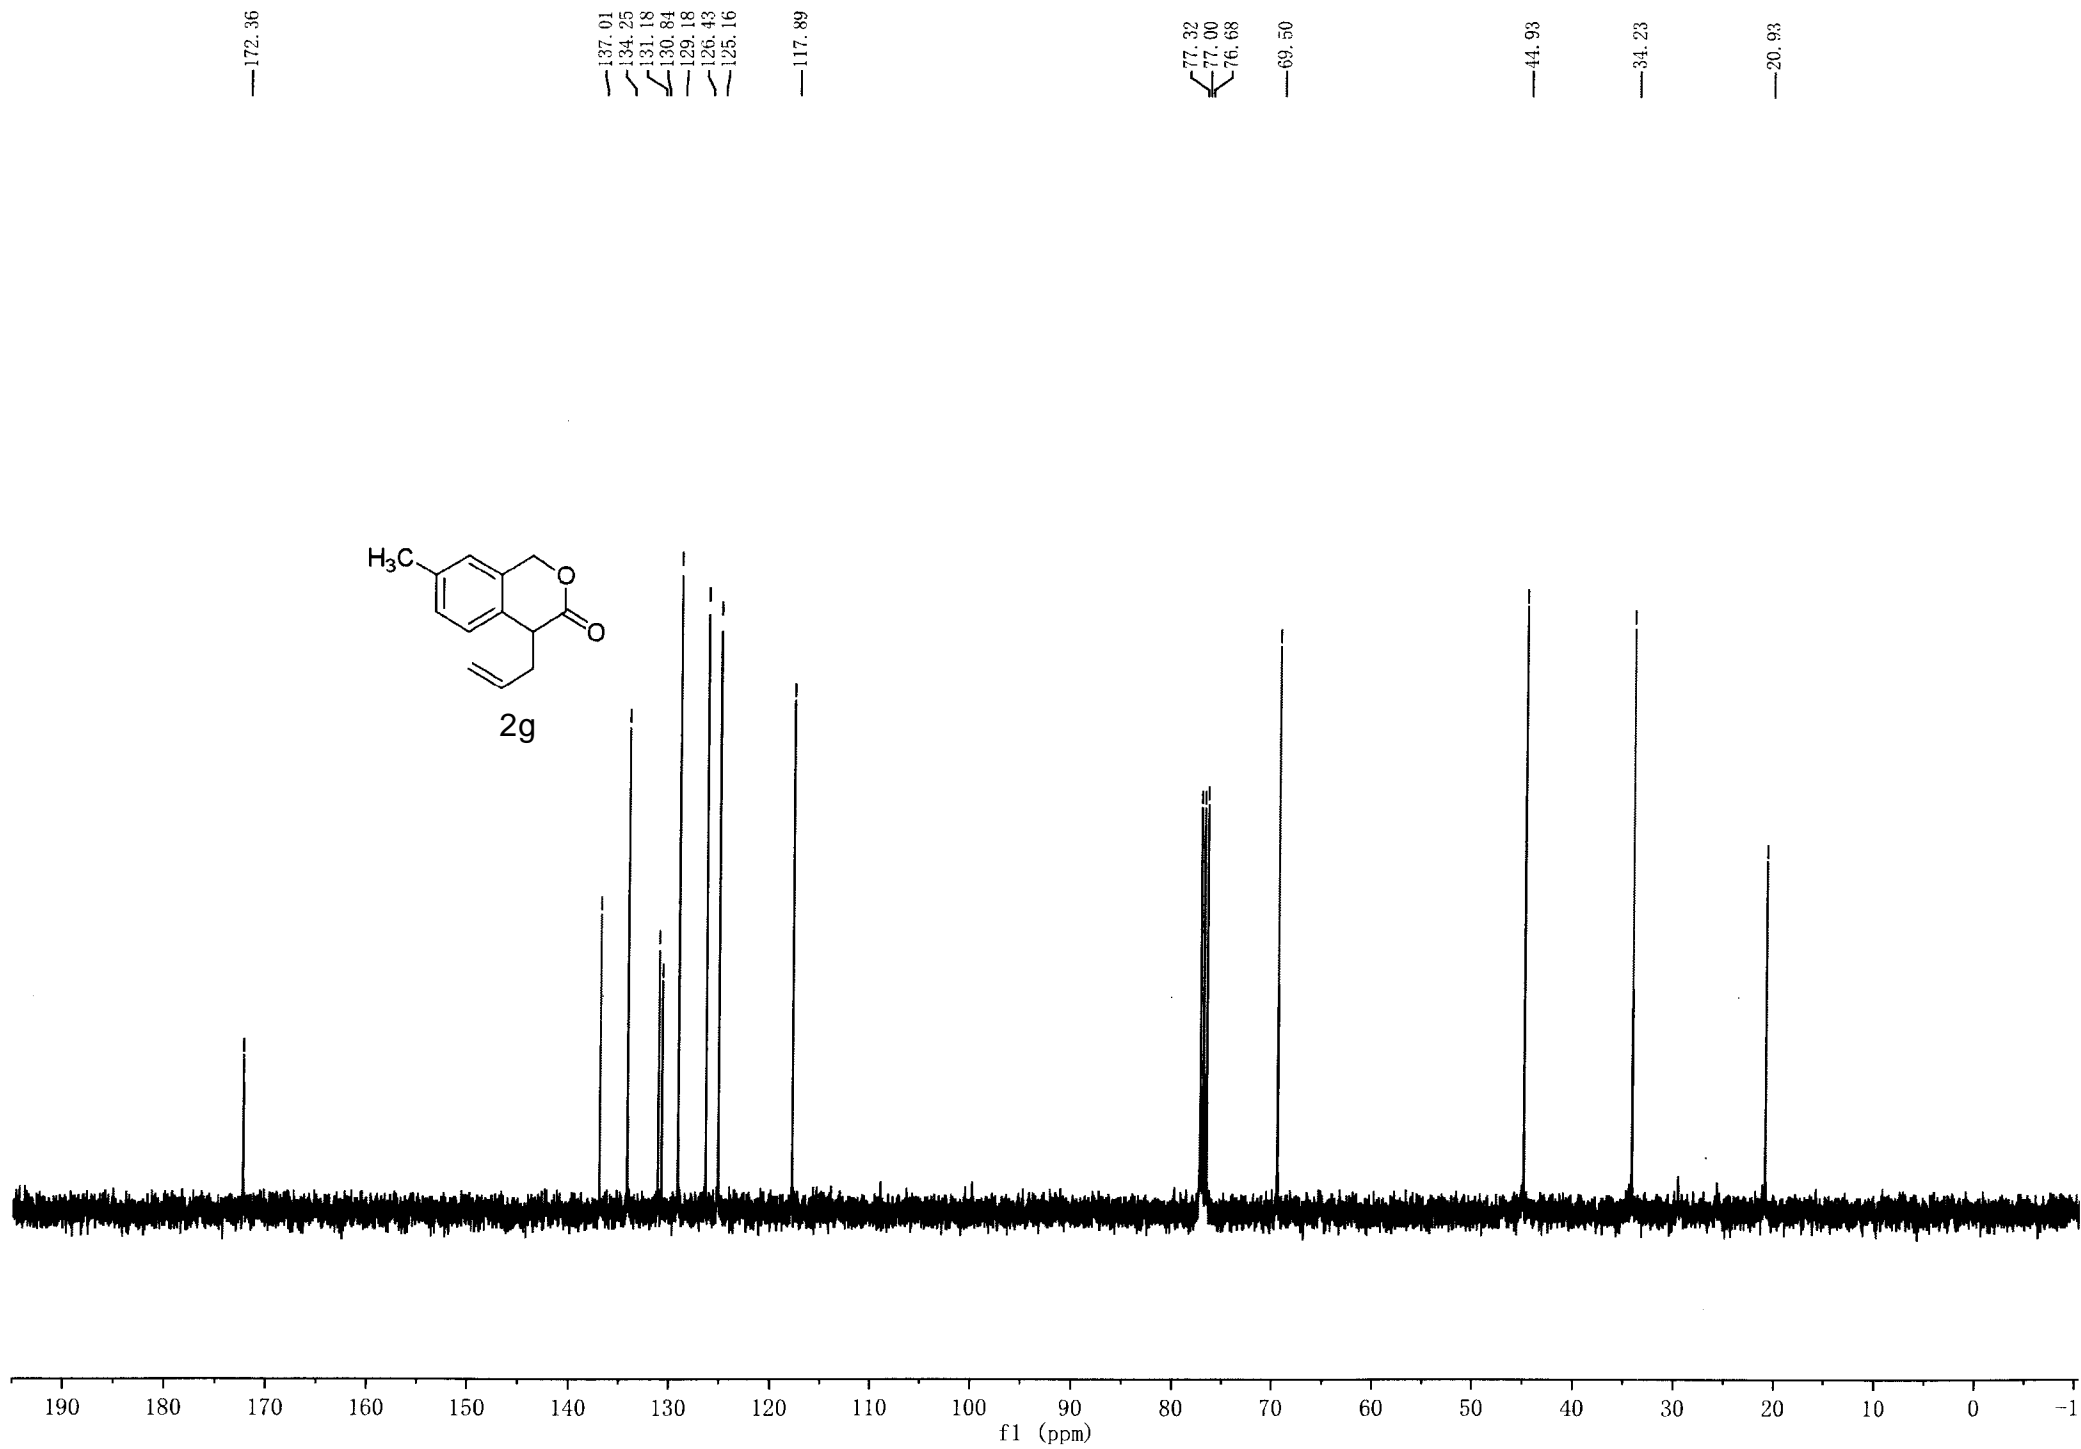

7.285  
7.152  
7.131  
6.883  
6.878  
6.862  
6.857  
6.749  
5.899  
5.882  
5.873  
5.864  
5.856  
5.839  
5.831  
5.822  
5.814  
5.338  
5.239  
5.204  
5.135  
5.132  
5.112  
5.088  
3.799  
3.654  
3.637  
3.621  
2.813  
2.798  
2.778  
2.762  
2.746  
2.690  
2.672  
2.654  
2.636  
2.617

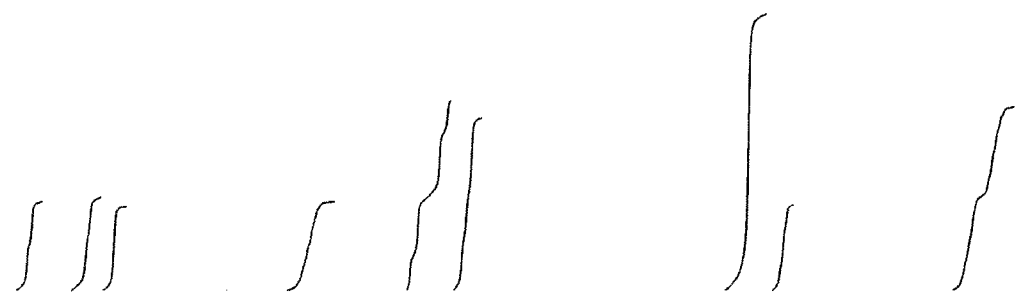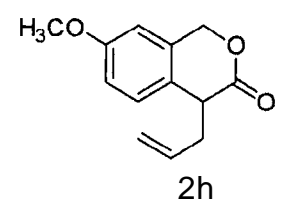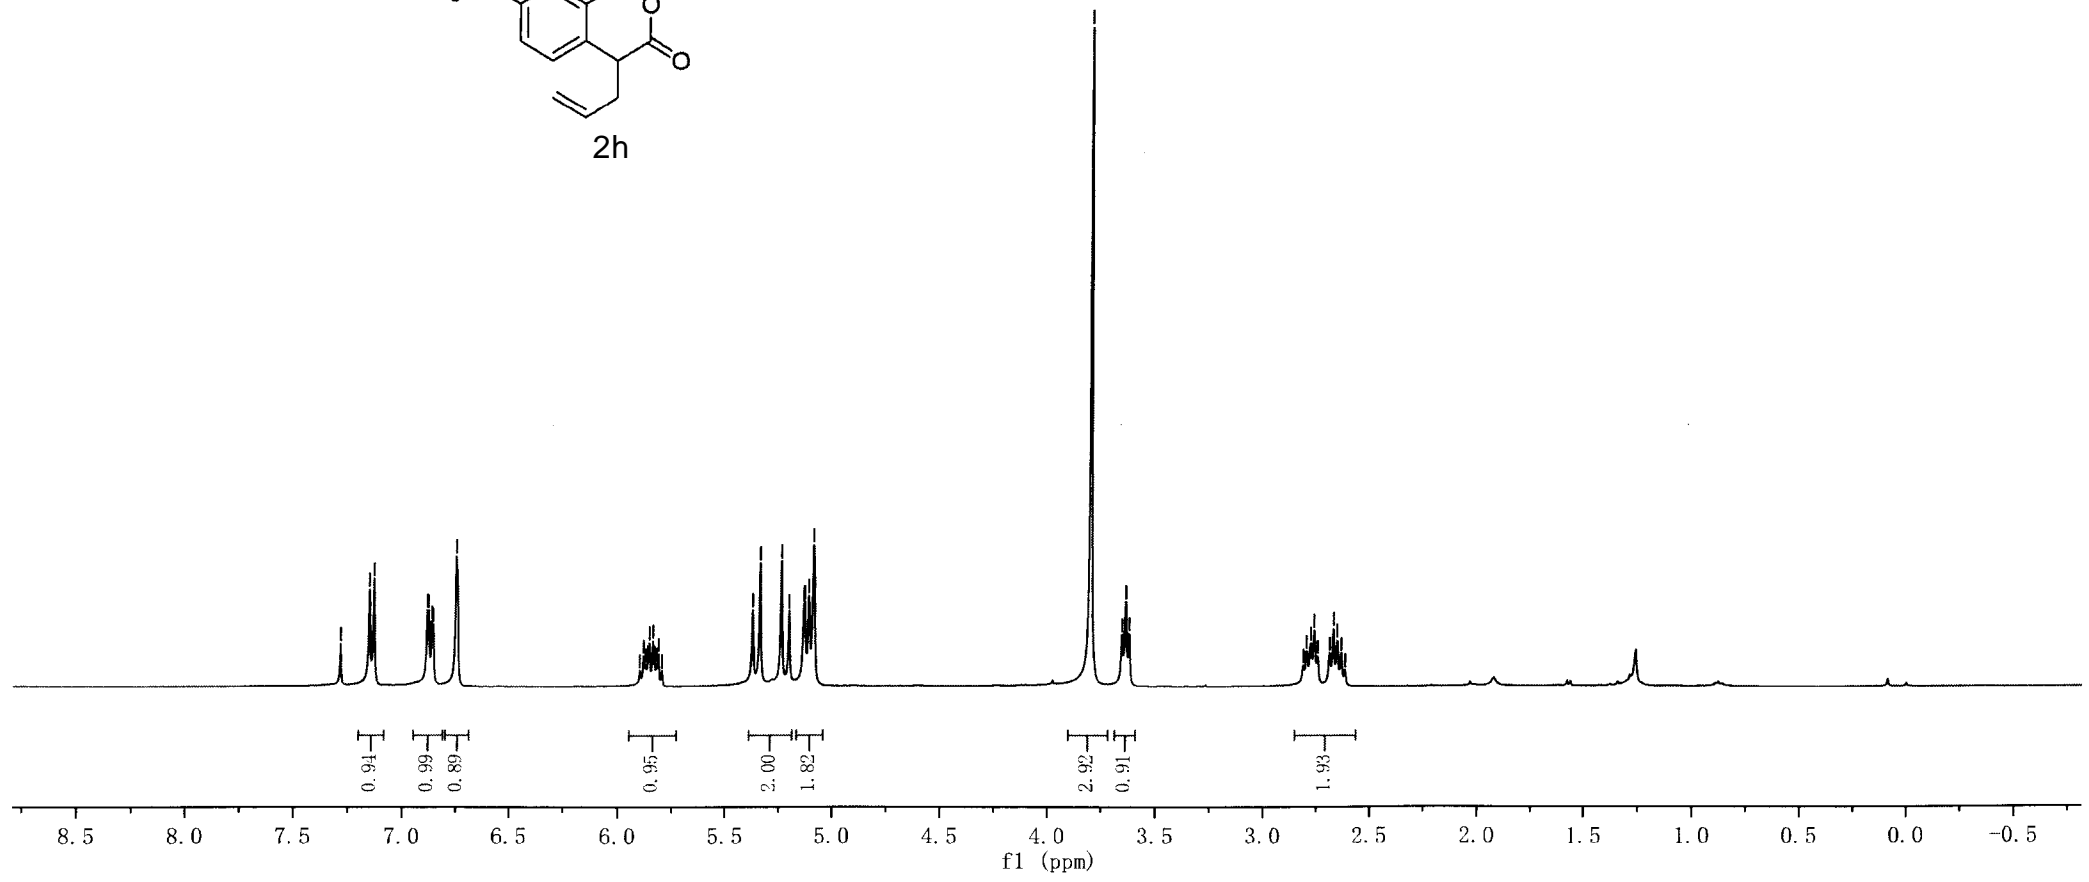

—172.30

—158.68

—134.20

—132.43

—127.65

—125.59

—117.86

—113.89

—110.11

—77.32

—77.00

—76.68

—69.39

—55.26

—44.46

—34.35

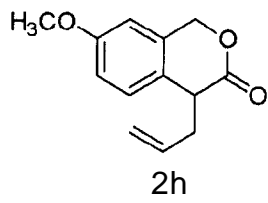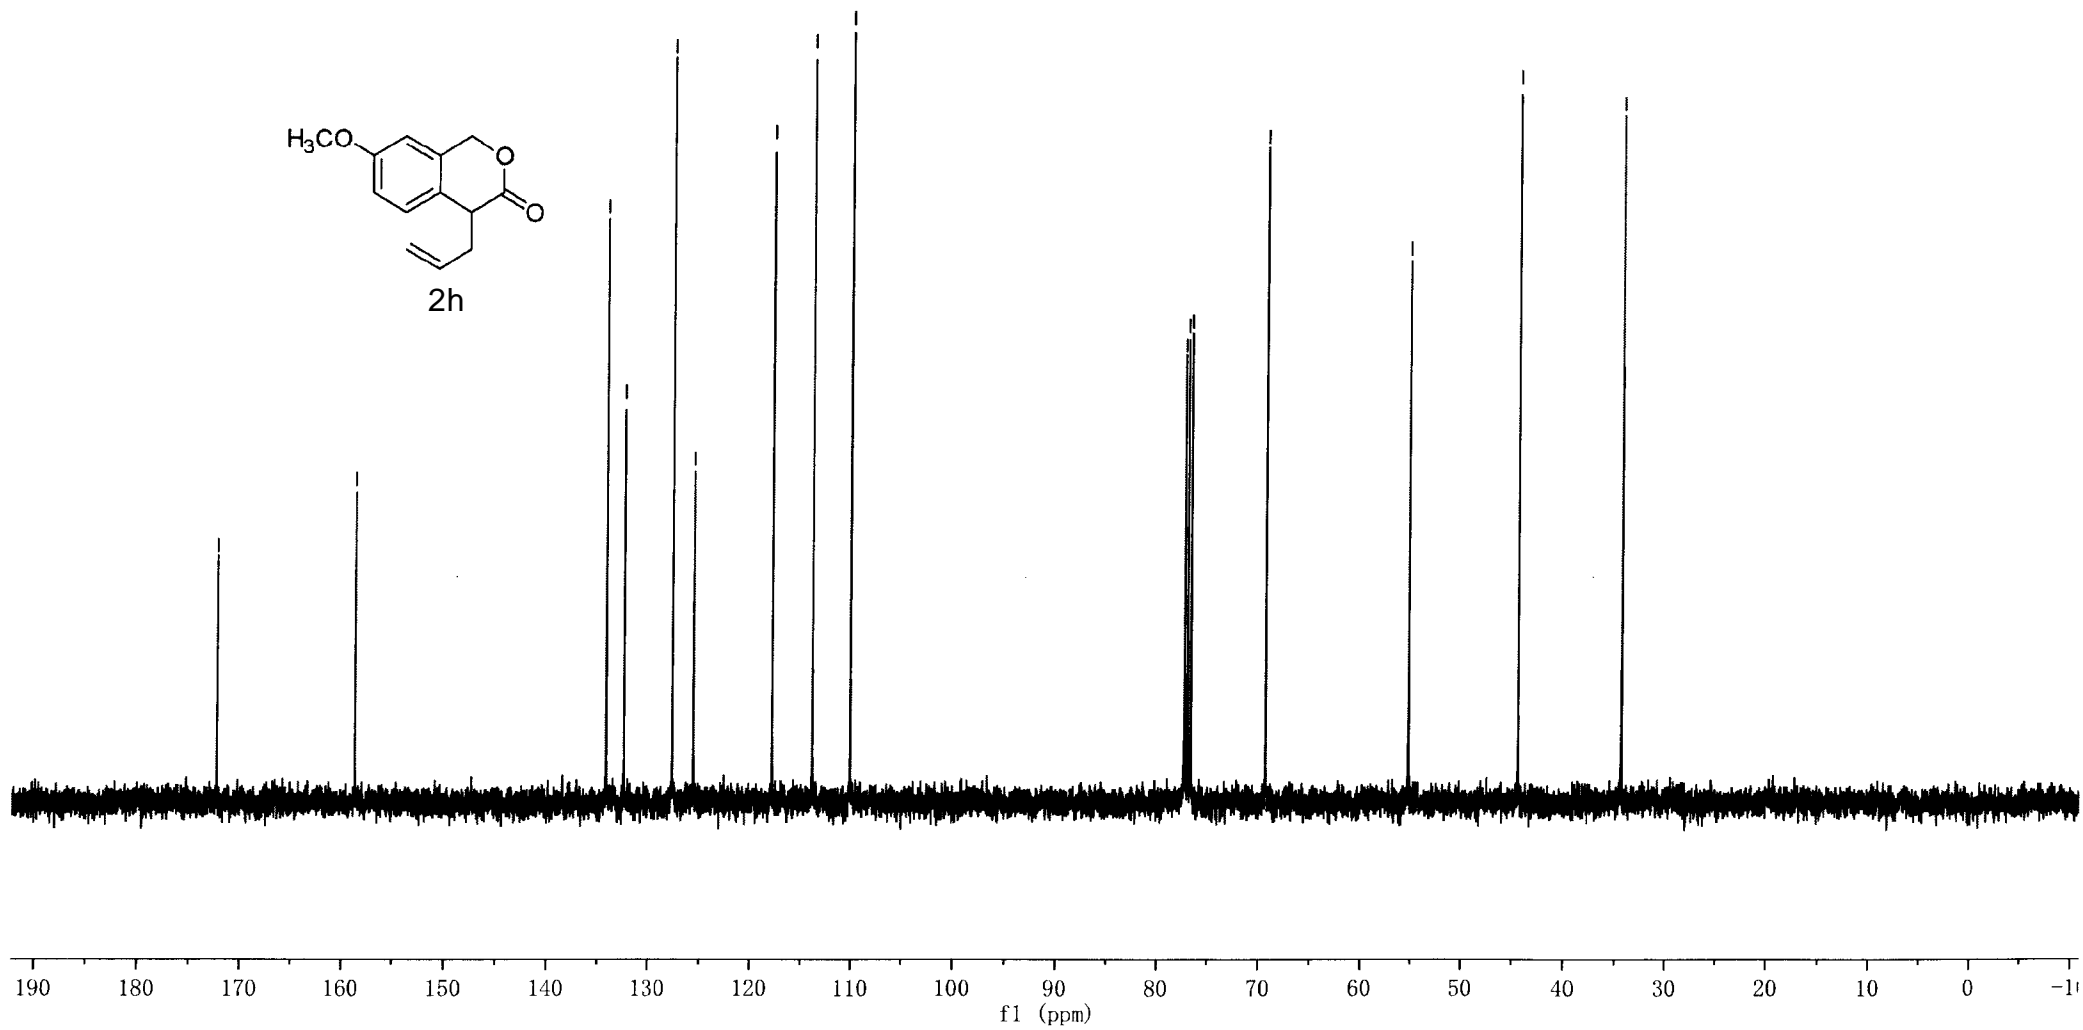



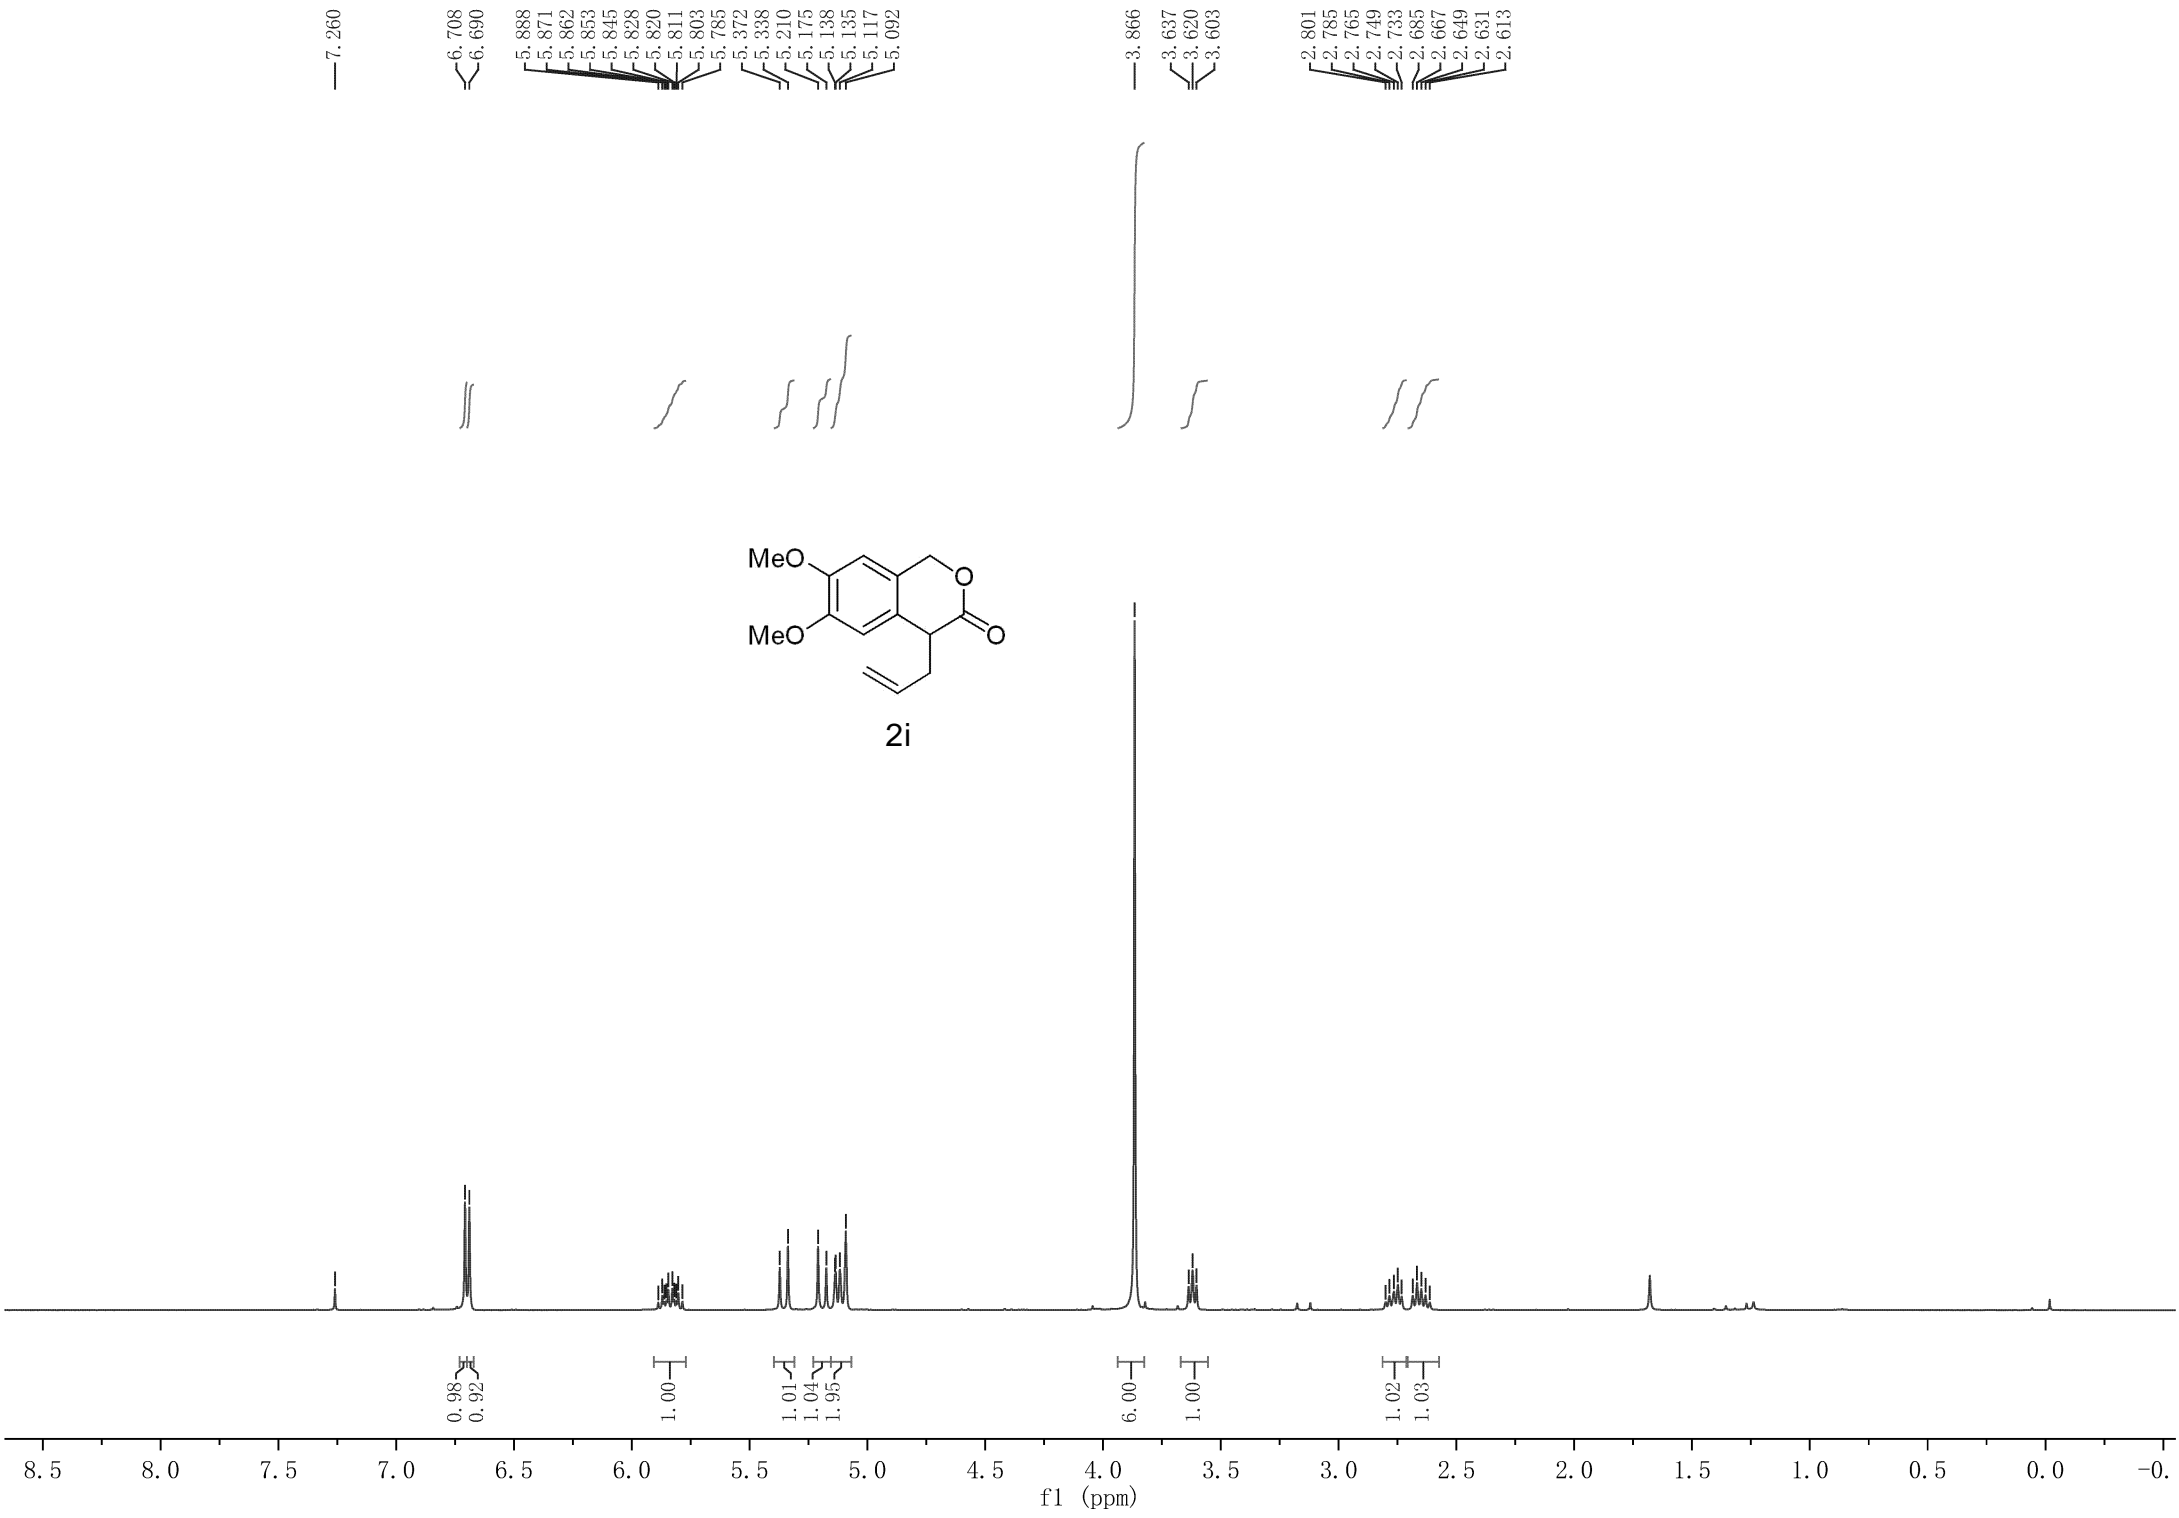

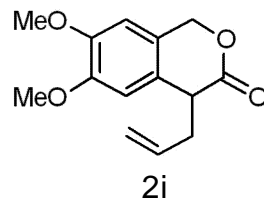

172.25  
149.18  
148.20  
134.23  
126.07  
123.22  
118.13  
109.95  
107.79  
77.25  
77.00  
76.75  
69.40  
56.06  
44.88  
34.95

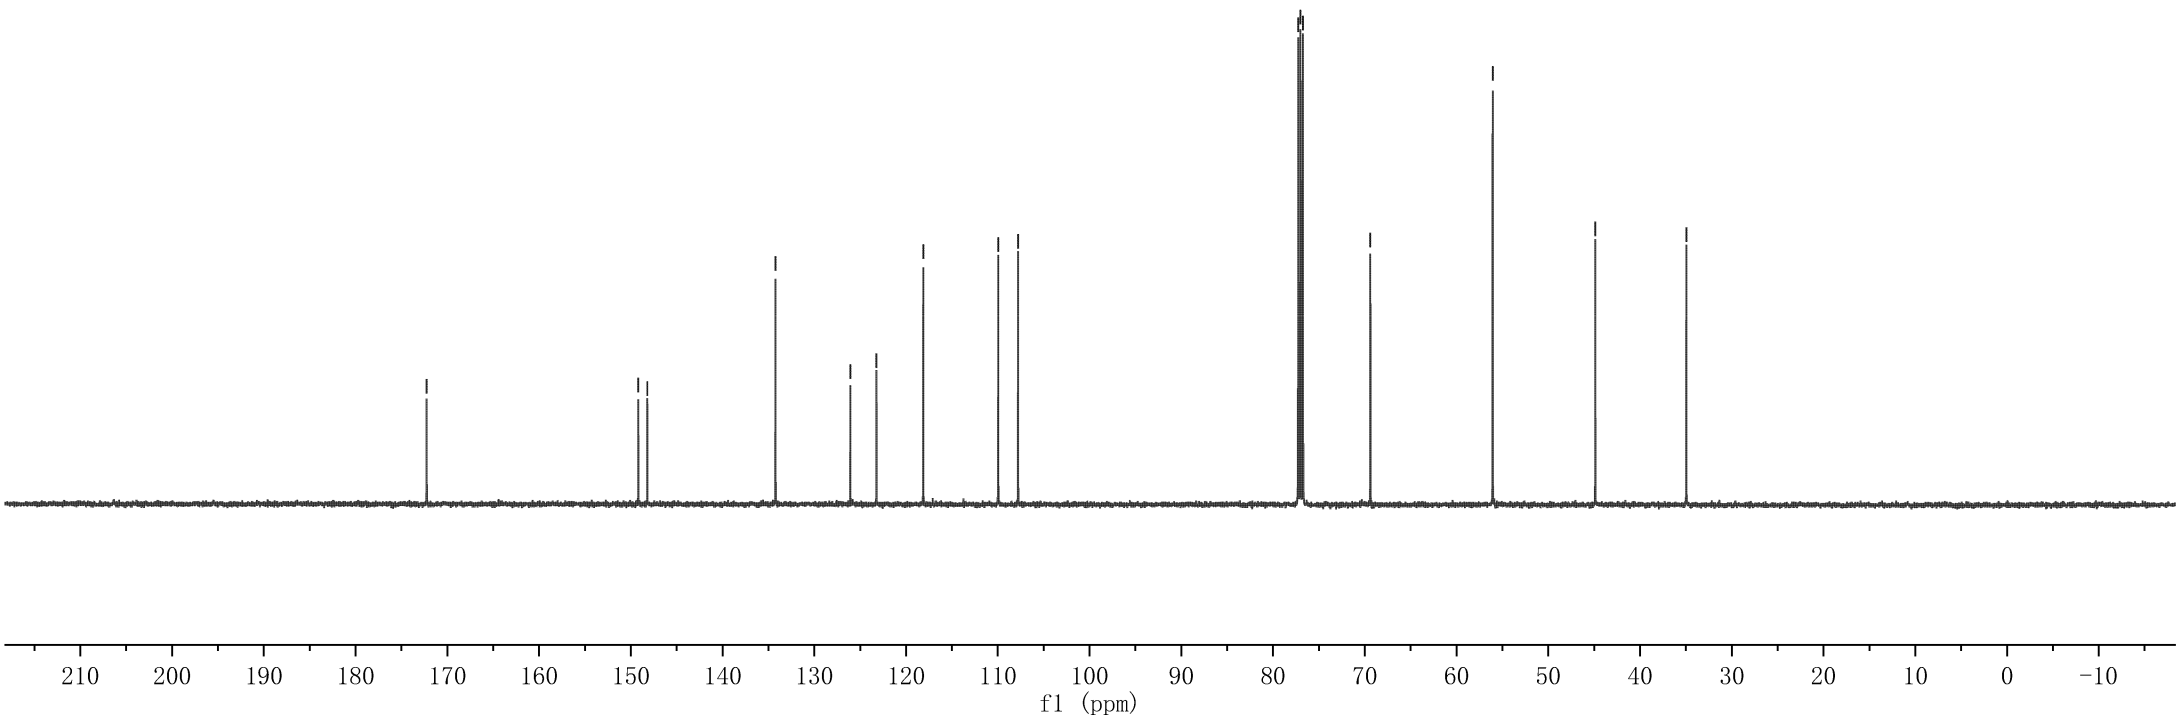

7.284  
7.279  
7.263  
7.259  
7.239  
7.172  
7.152

5.899  
5.882  
5.865  
5.857  
5.839  
5.831  
5.814  
5.797  
5.381  
5.346  
5.266  
5.231  
5.157  
5.155  
5.126  
5.118

3.680  
3.663  
3.646

2.847  
2.831  
2.811  
2.795  
2.779  
2.722  
2.704  
2.686  
2.668  
2.649

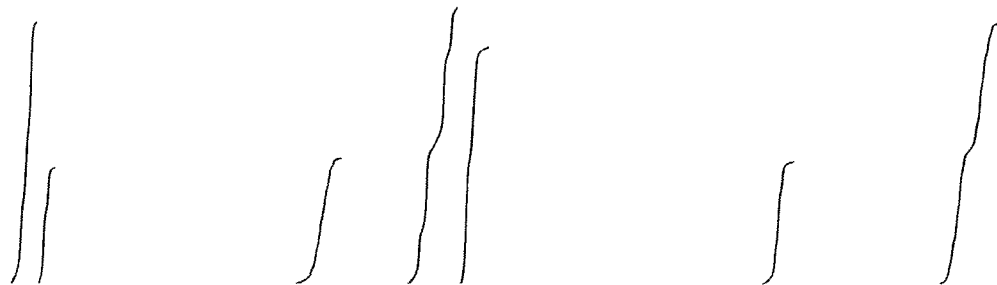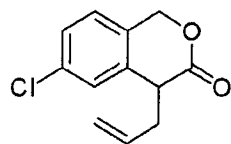

2j

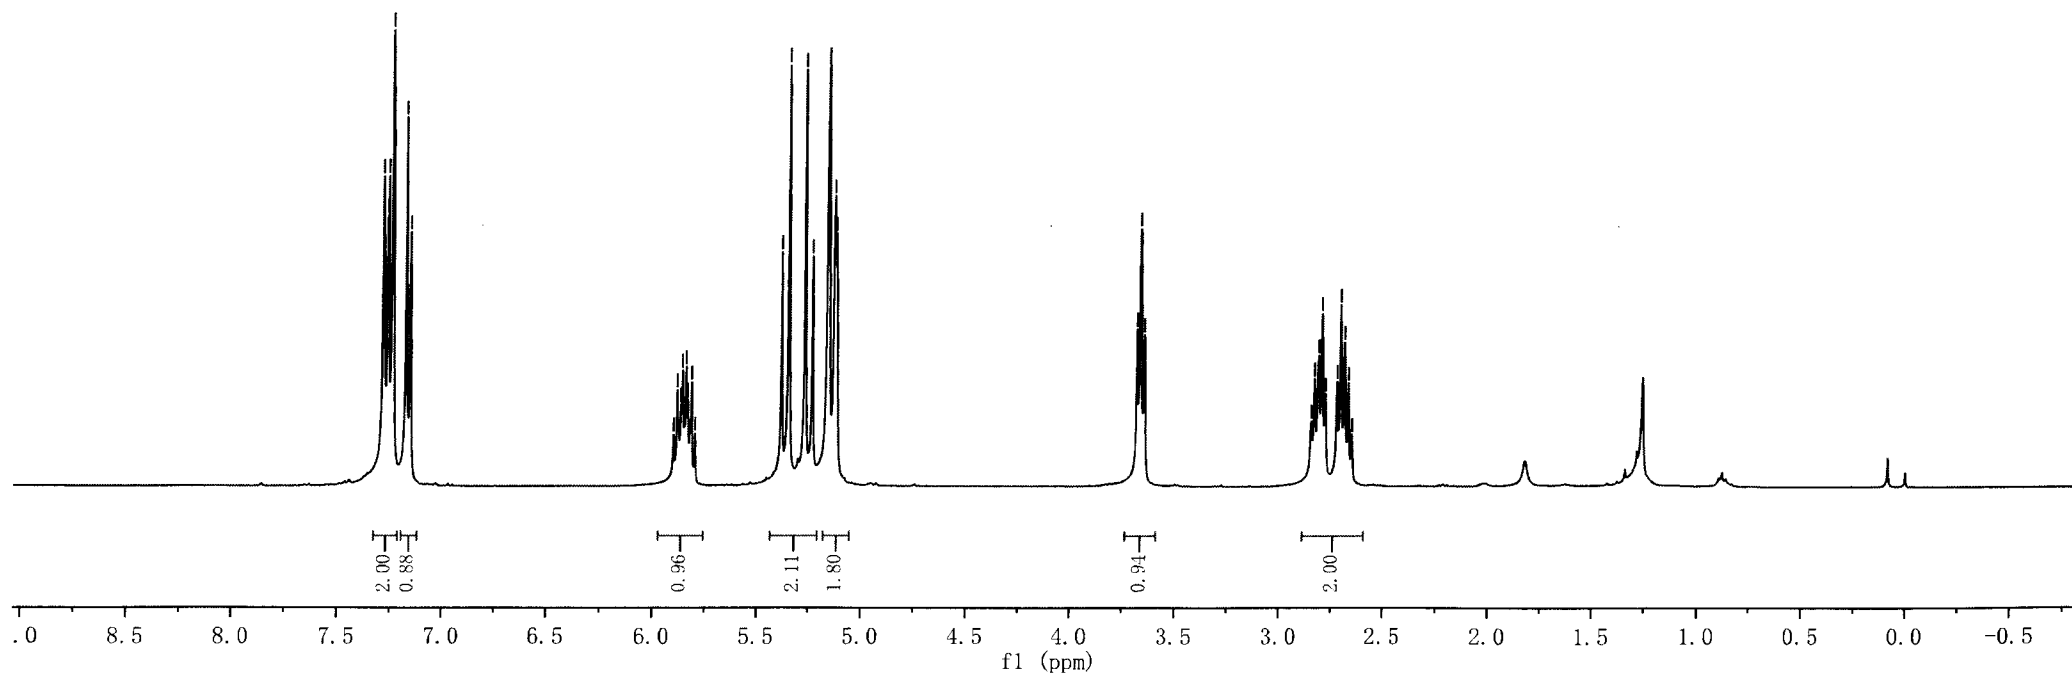

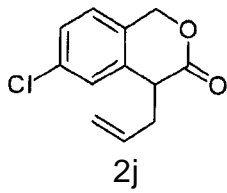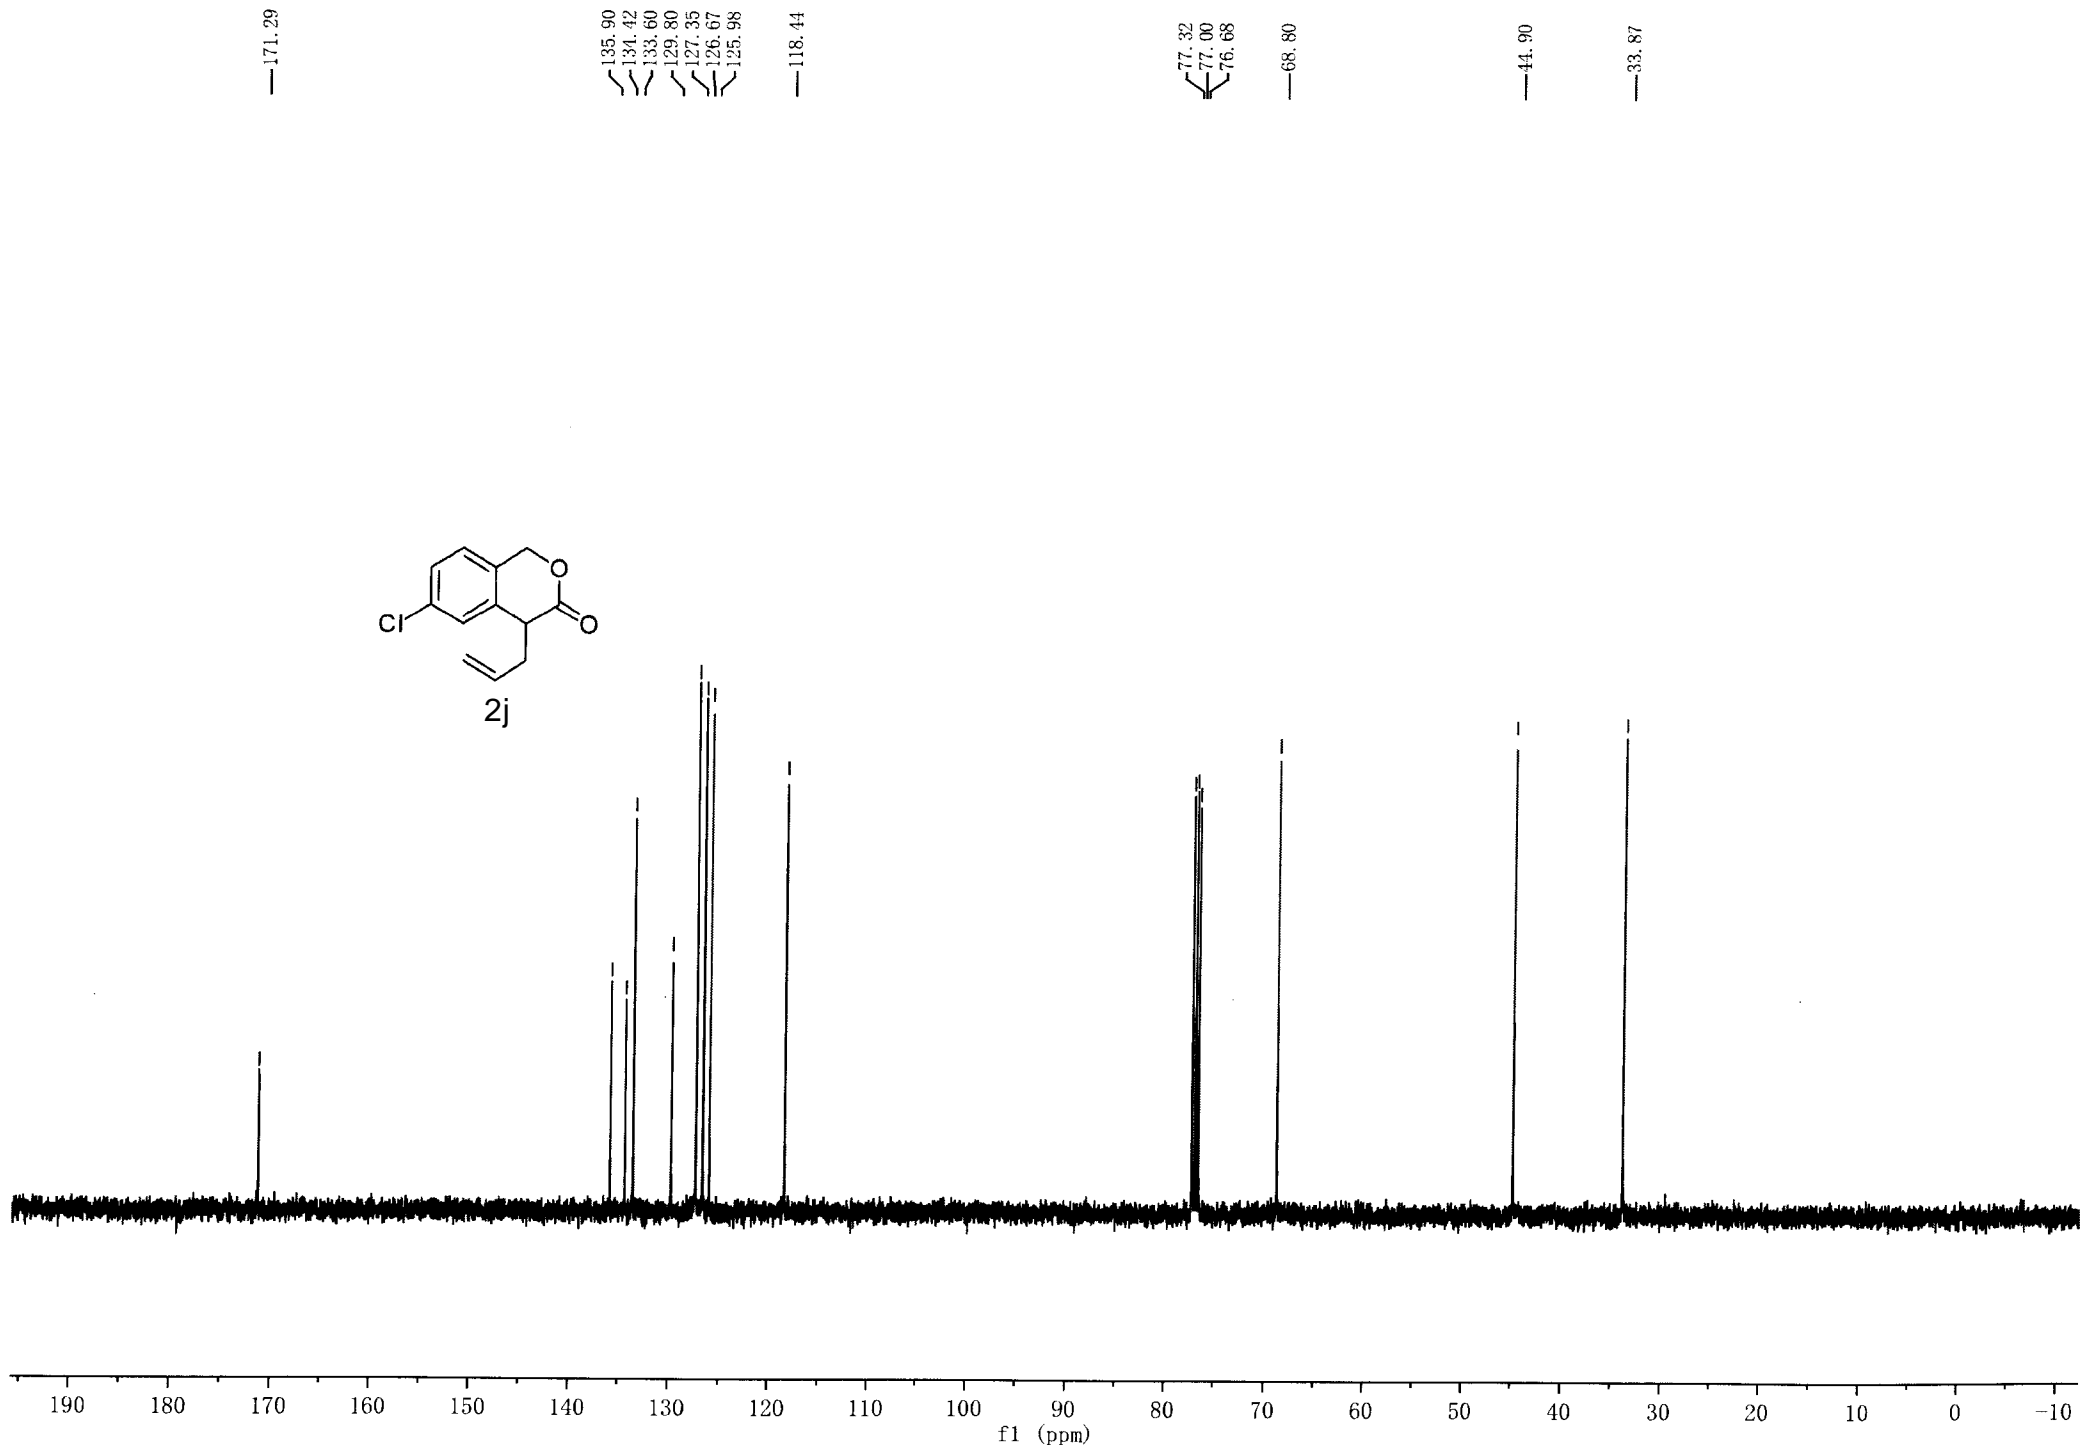

7.358  
7.344  
7.338  
7.324  
7.318  
7.304  
7.034  
7.025  
7.011  
6.990  
5.879  
5.862  
5.855  
5.845  
5.837  
5.819  
5.811  
5.801  
5.794  
5.776  
5.478  
5.442  
5.417  
5.138  
5.134  
5.131  
5.102  
5.098  
5.094  
3.744  
3.727  
3.710  
2.837  
2.821  
2.804  
2.801  
2.785  
2.769  
2.733  
2.715  
2.697  
2.679  
2.660

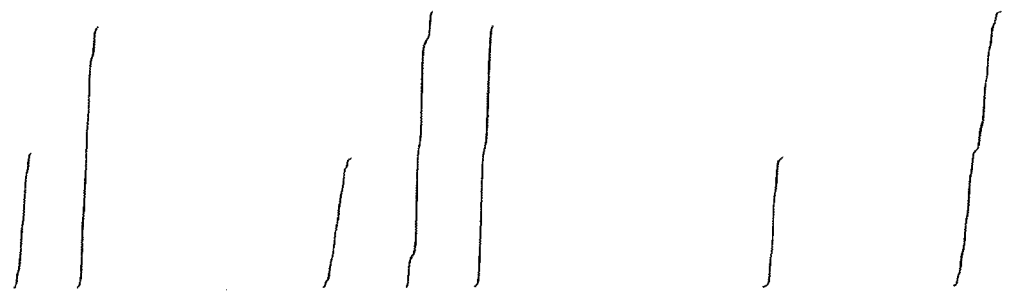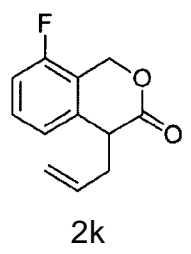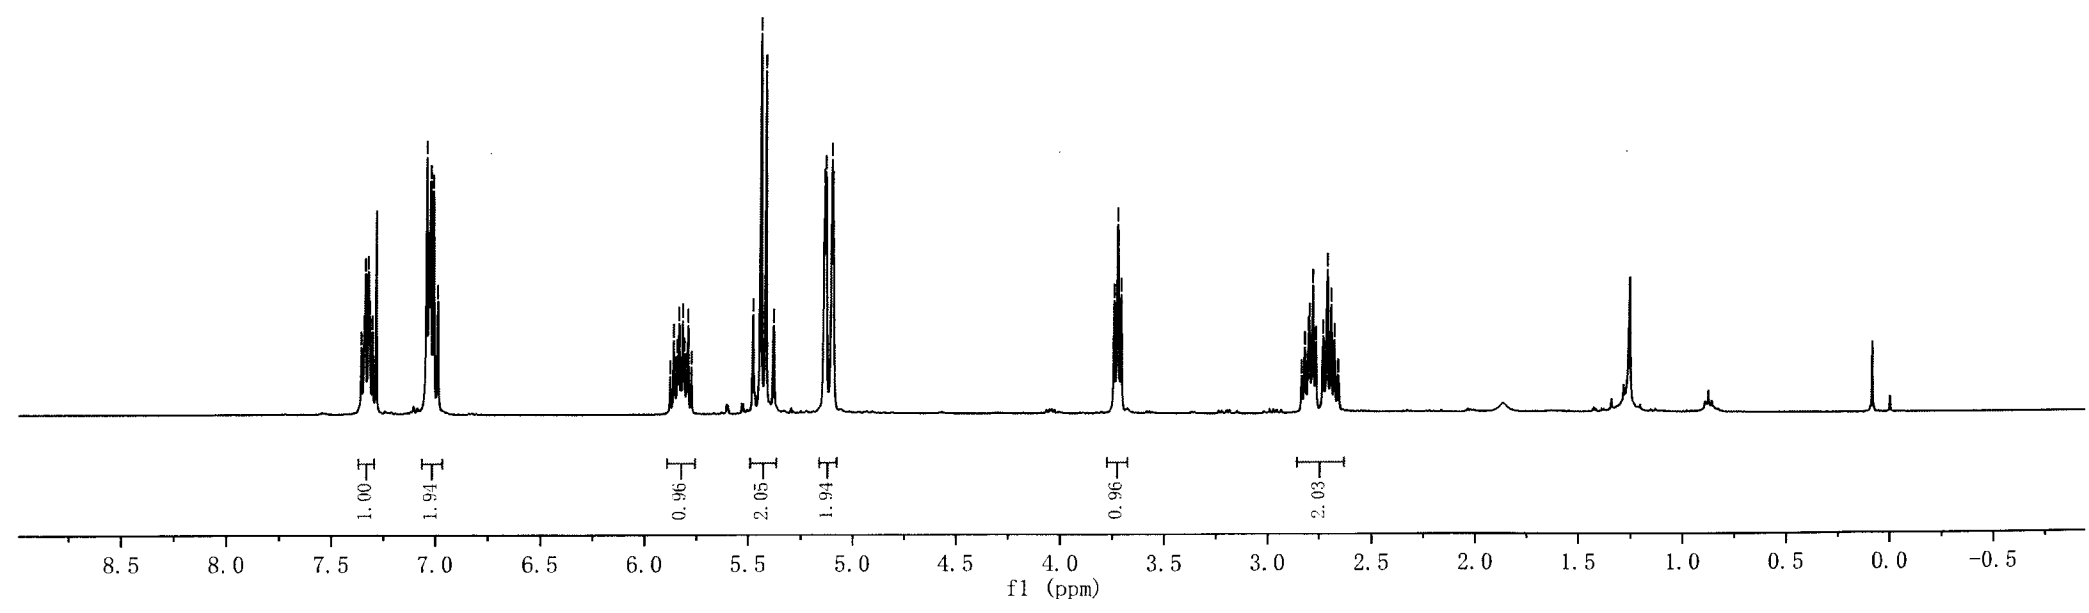

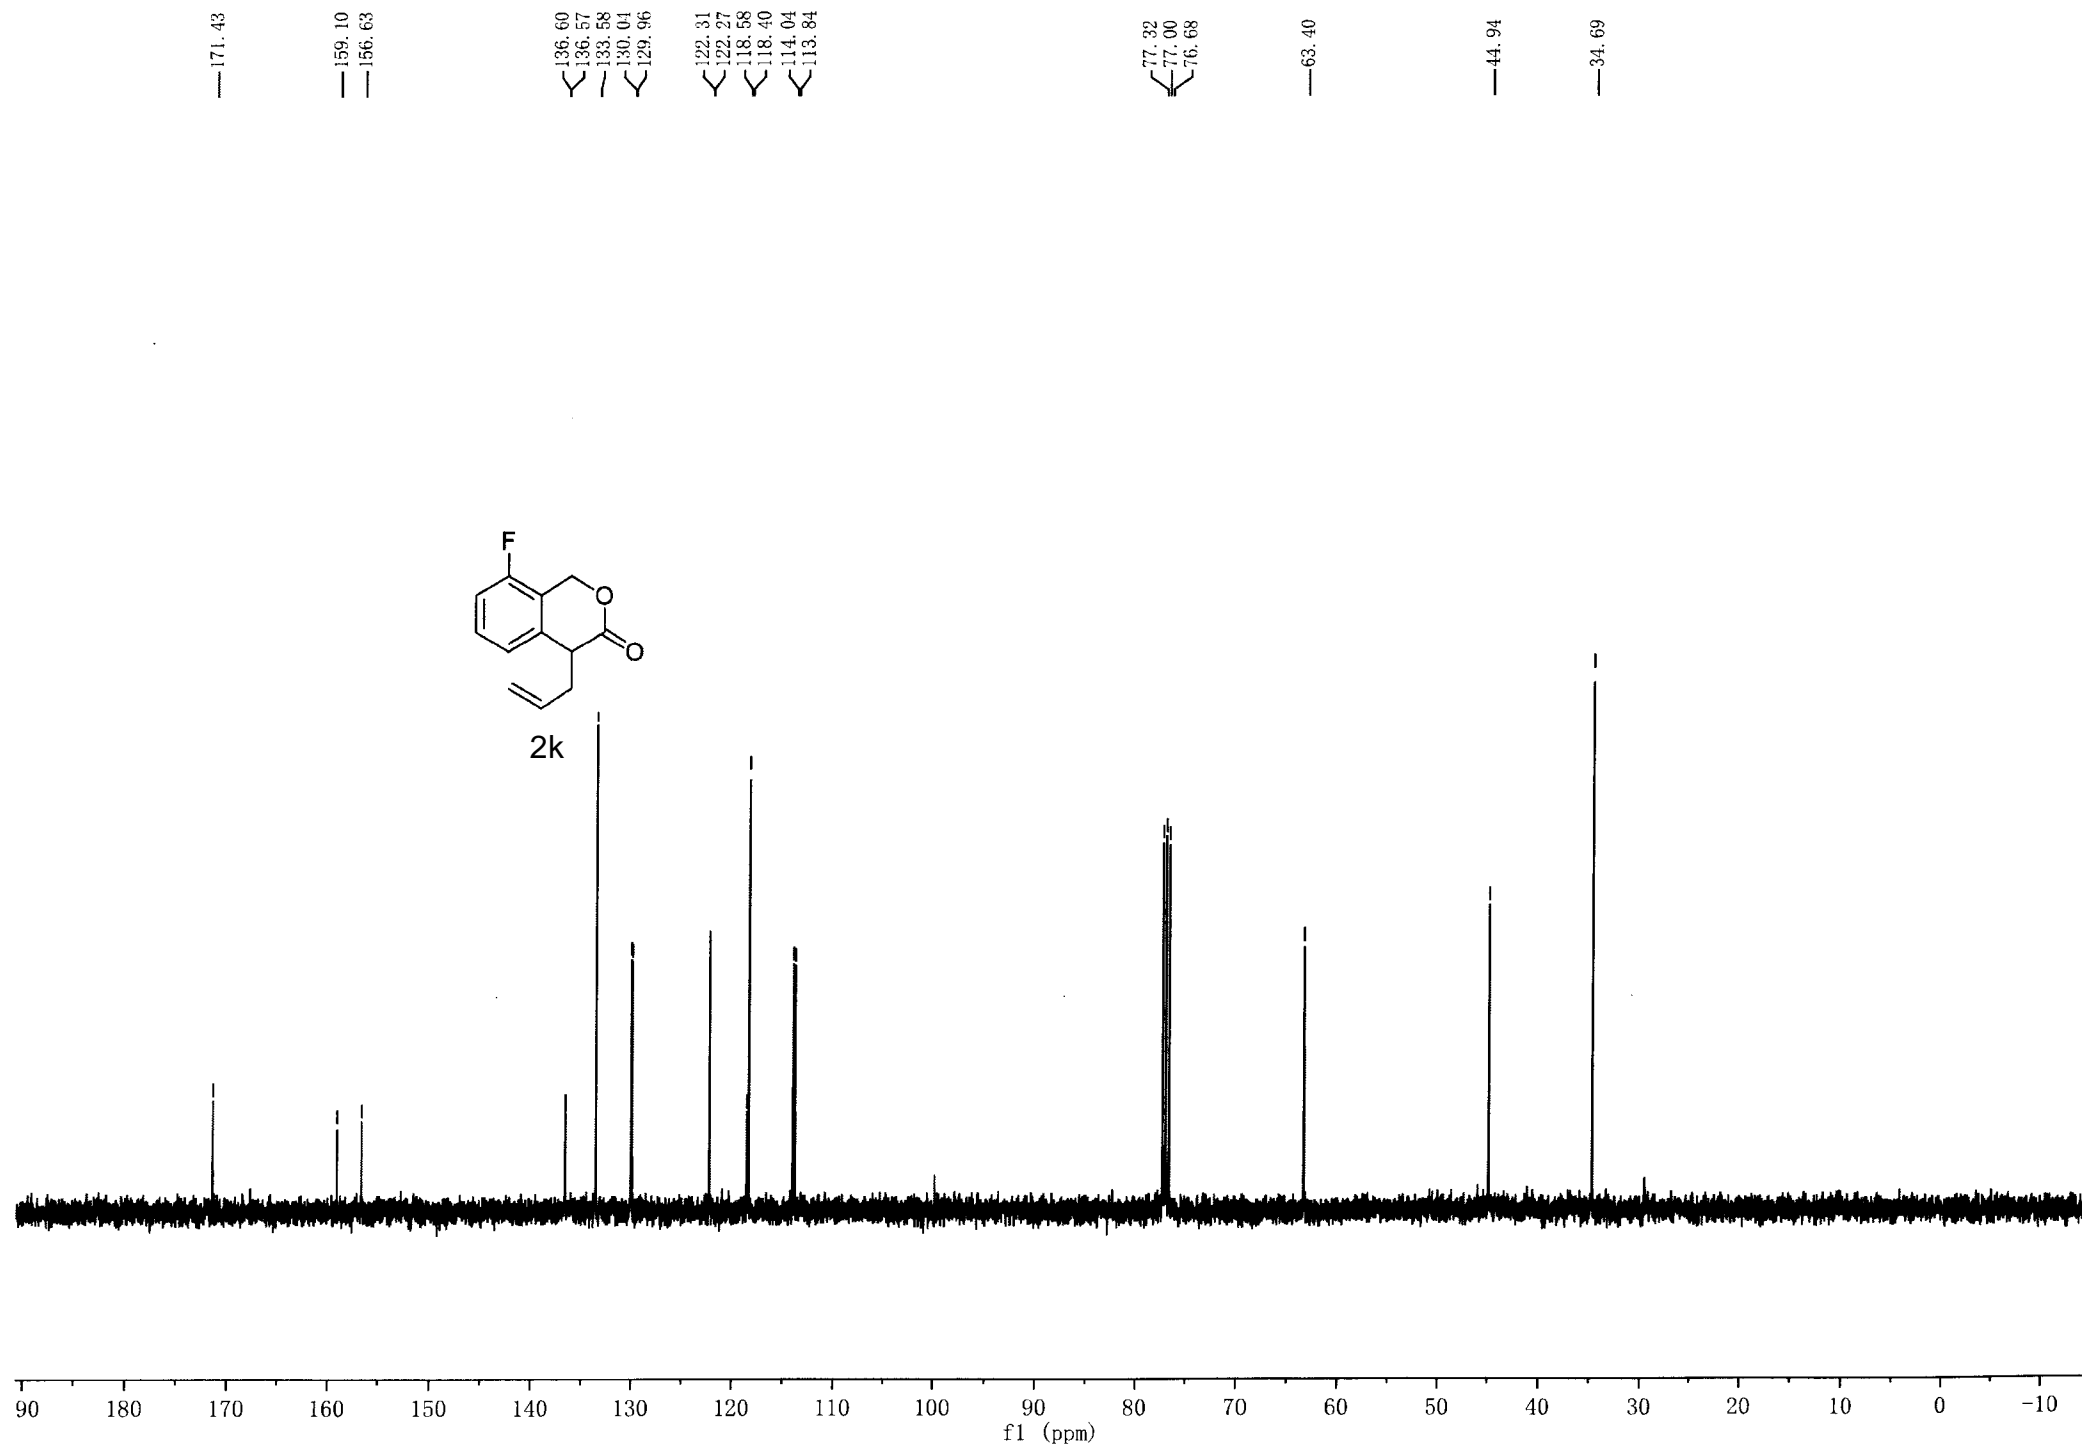

7.270  
7.210  
7.191  
7.182  
7.176  
7.049  
7.037  
7.030  
7.022  
7.016

5.875  
5.832  
5.814  
5.772  
5.577  
5.541  
5.191  
5.156  
5.120  
5.104  
5.079

3.993  
3.974  
3.956

2.631  
2.595  
2.559  
2.527  
2.492  
2.313

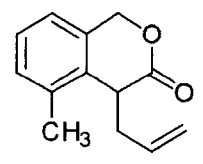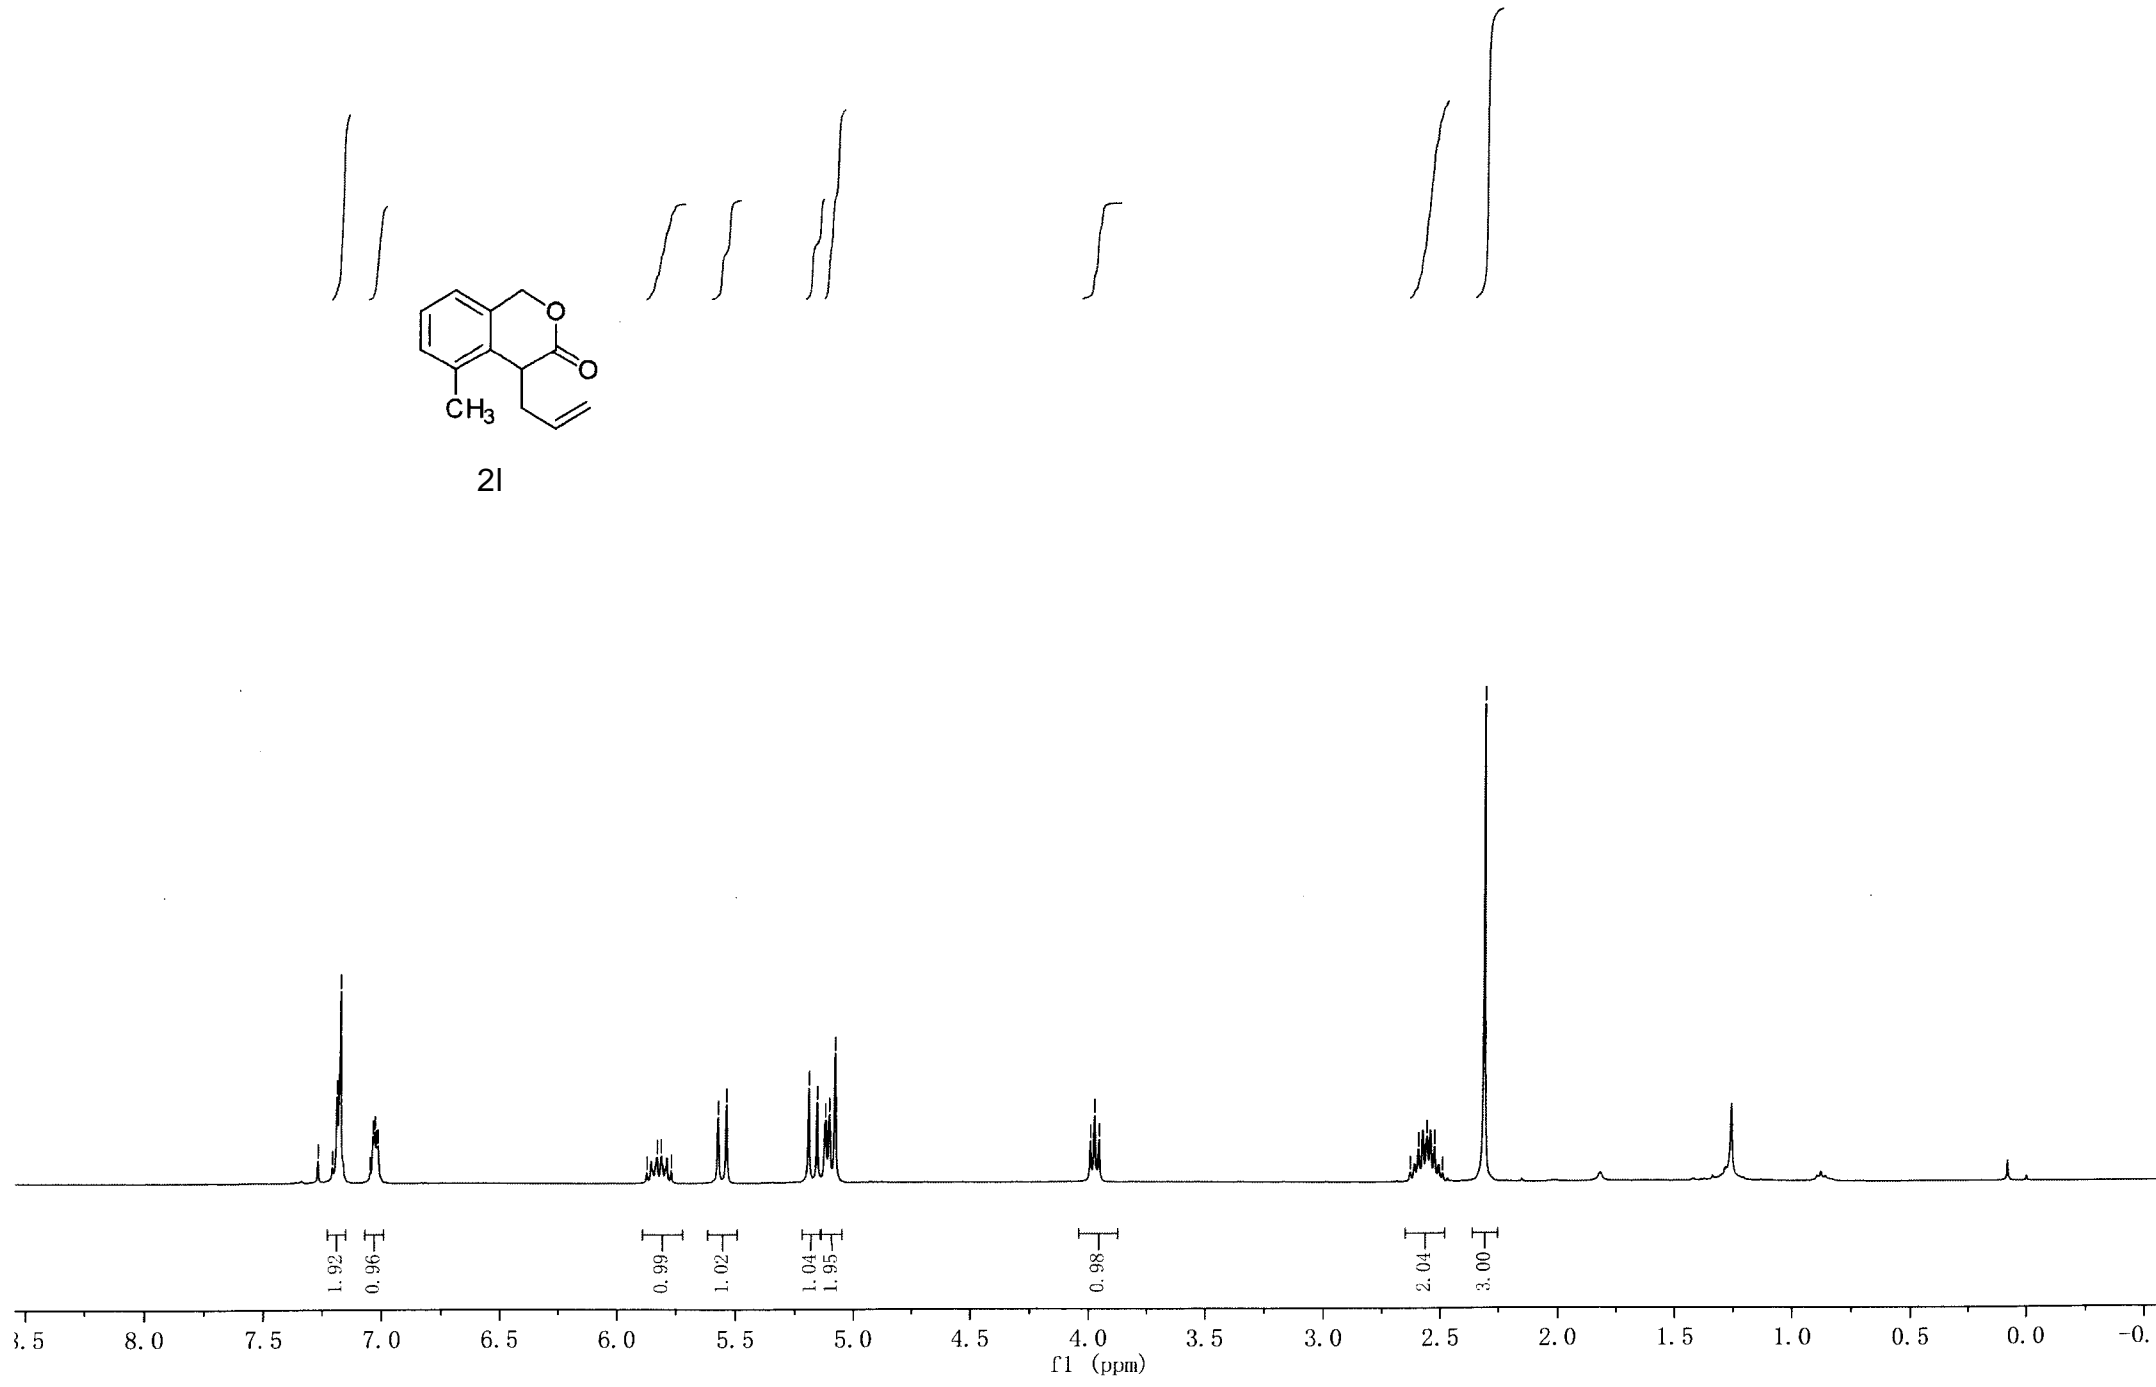

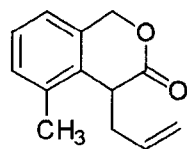

2l

172.18  
135.23  
133.51  
132.52  
130.47  
130.39  
127.11  
122.43  
118.41

77.32  
77.00  
76.68  
69.77

43.75

35.51

18.16

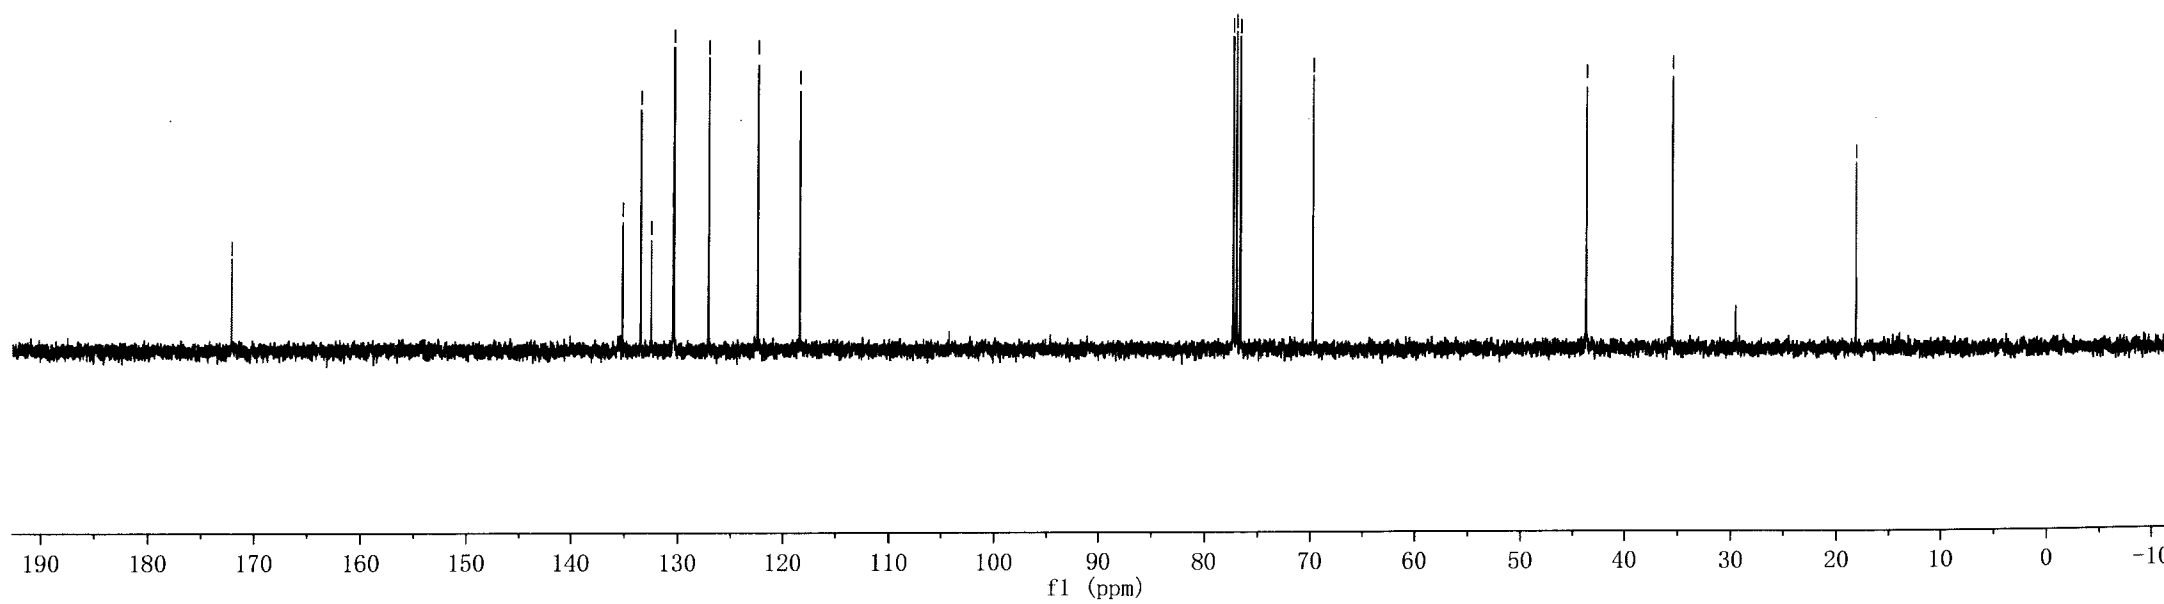



7.343  
7.326  
7.305  
7.286  
7.268  
7.223  
7.205  
7.187

5.450  
5.415  
5.307  
5.272

4.851  
4.638

3.832  
3.817  
3.811  
3.796

2.816  
2.801  
2.779  
2.764  
2.572  
2.550  
2.535  
2.513

1.819

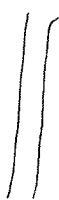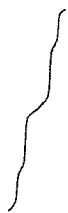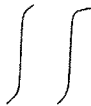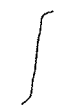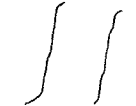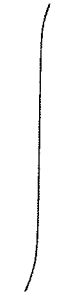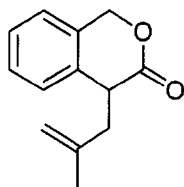

2m

1.93  
1.87

2.09

1.02  
0.99

0.96

1.05  
0.97

3.00

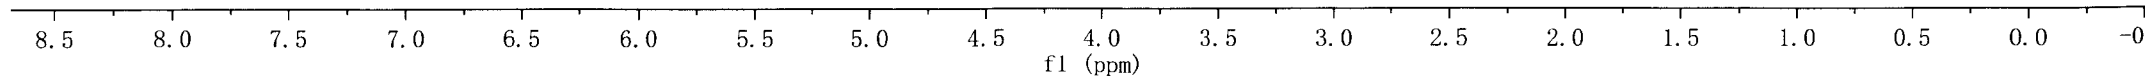

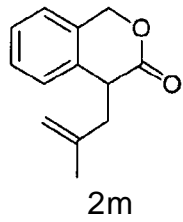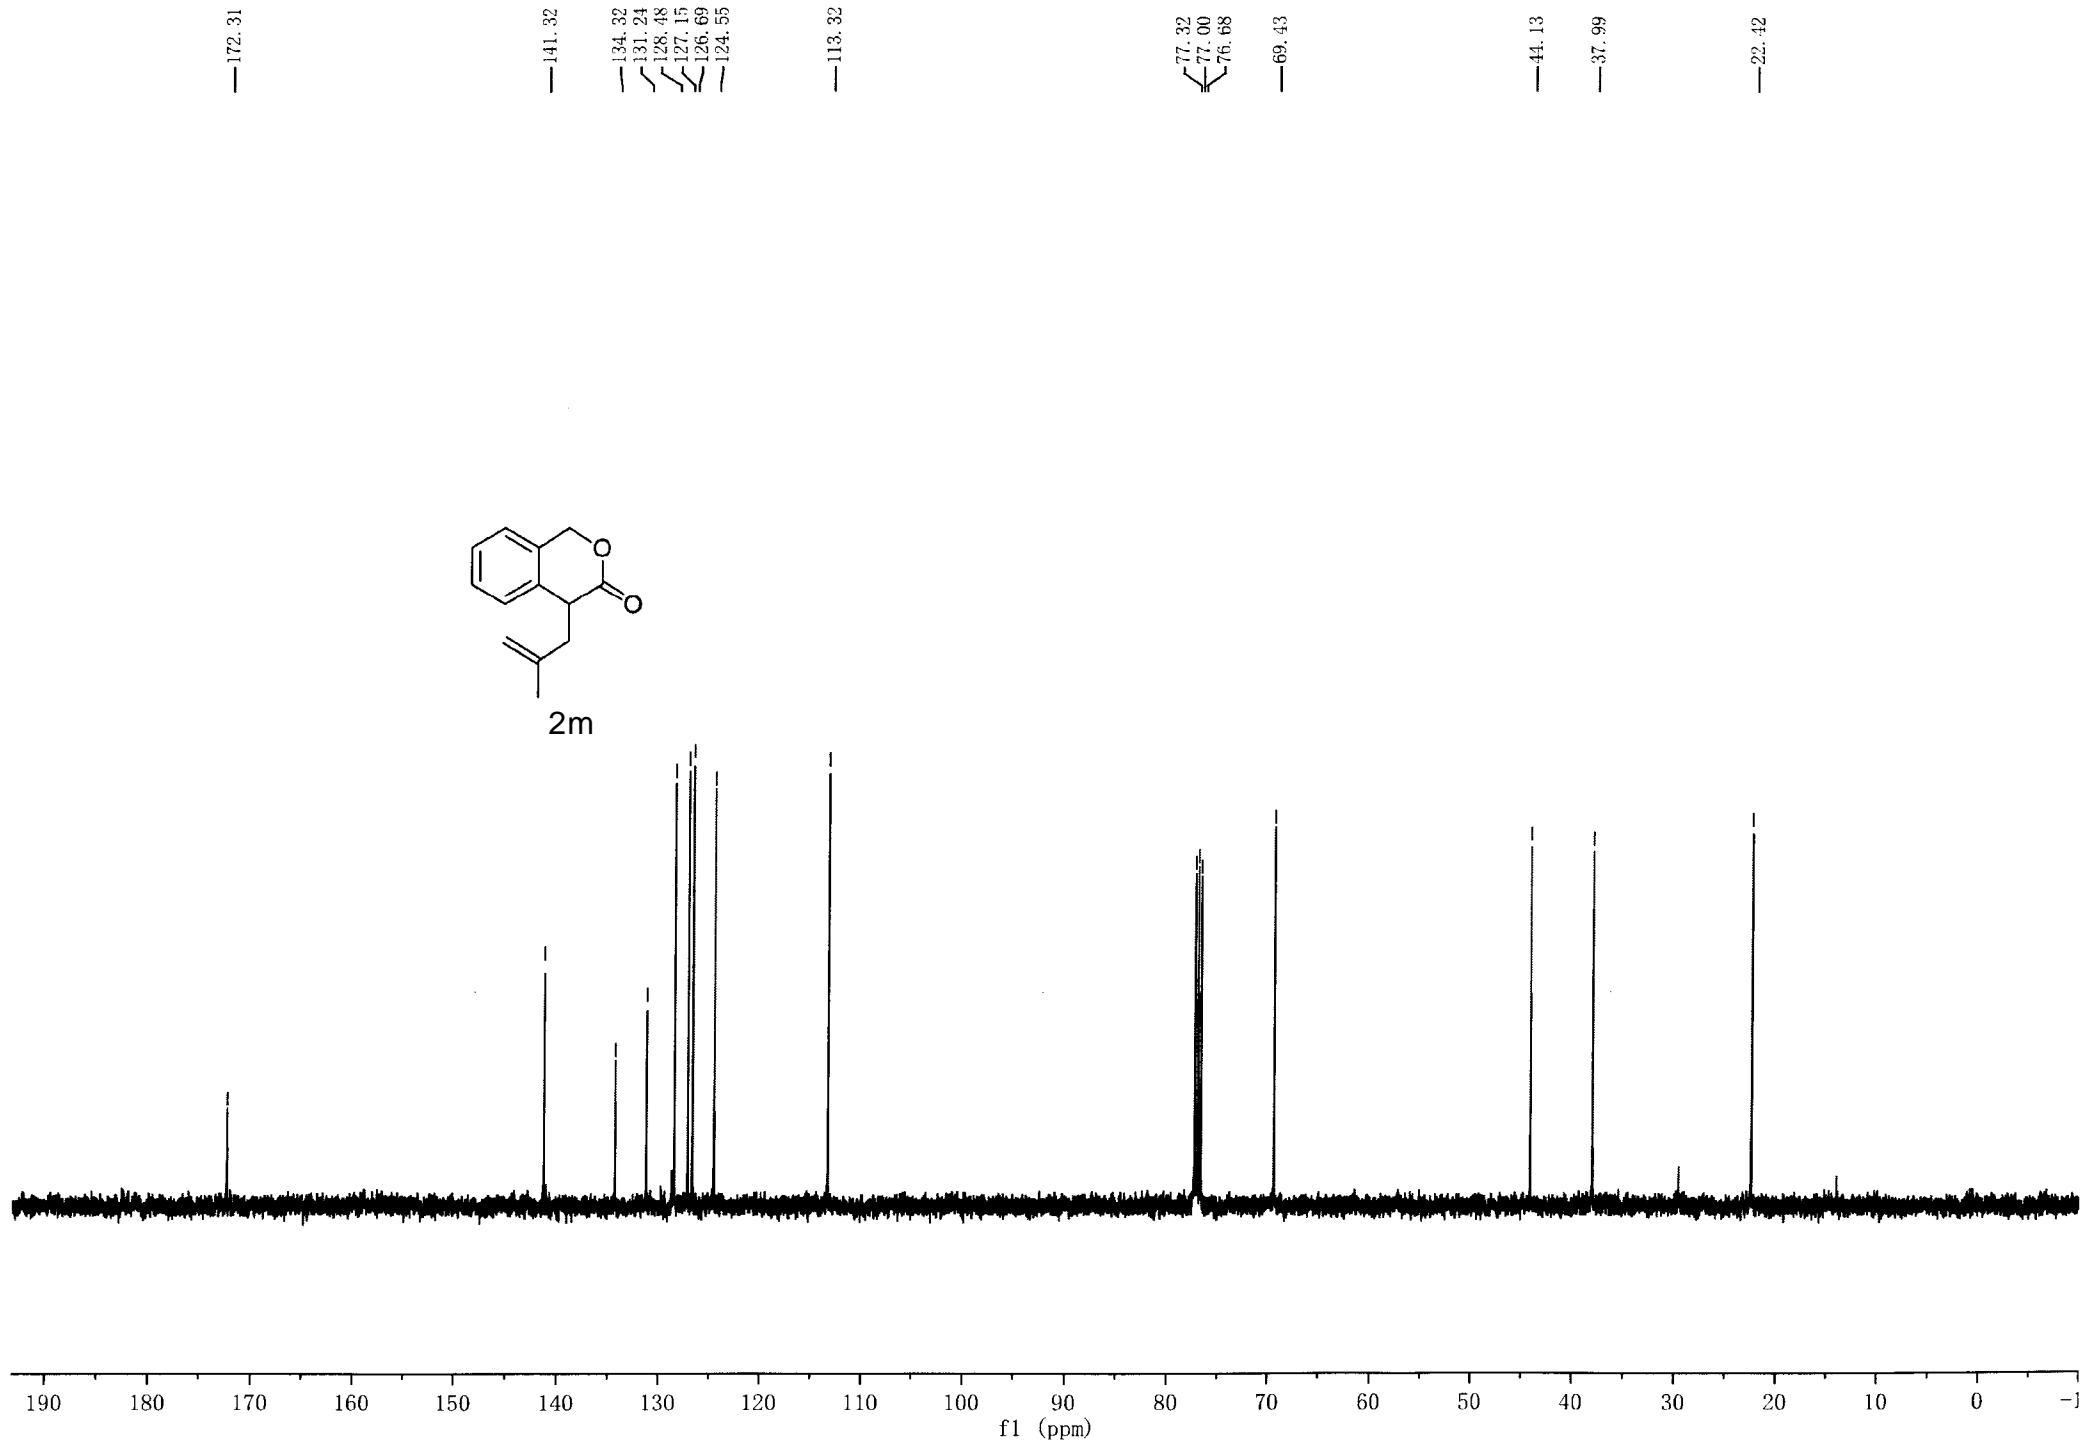

7.459  
7.456  
7.442  
7.380  
7.366  
7.350  
7.321  
7.307  
7.302  
7.292  
7.285  
7.281  
7.274  
7.267  
7.263  
7.256  
7.195  
7.183  
7.179  
7.090  
7.085  
7.073

5.434  
5.406  
5.362  
5.264  
5.236  
— 4.978

3.770  
3.760  
3.752  
3.742  
3.432  
3.423  
3.403  
3.393  
2.980  
2.962  
2.951  
2.932

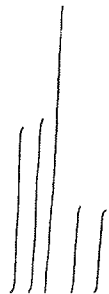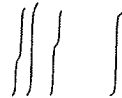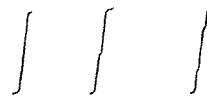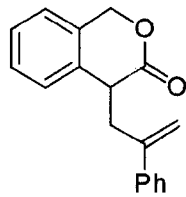

2n

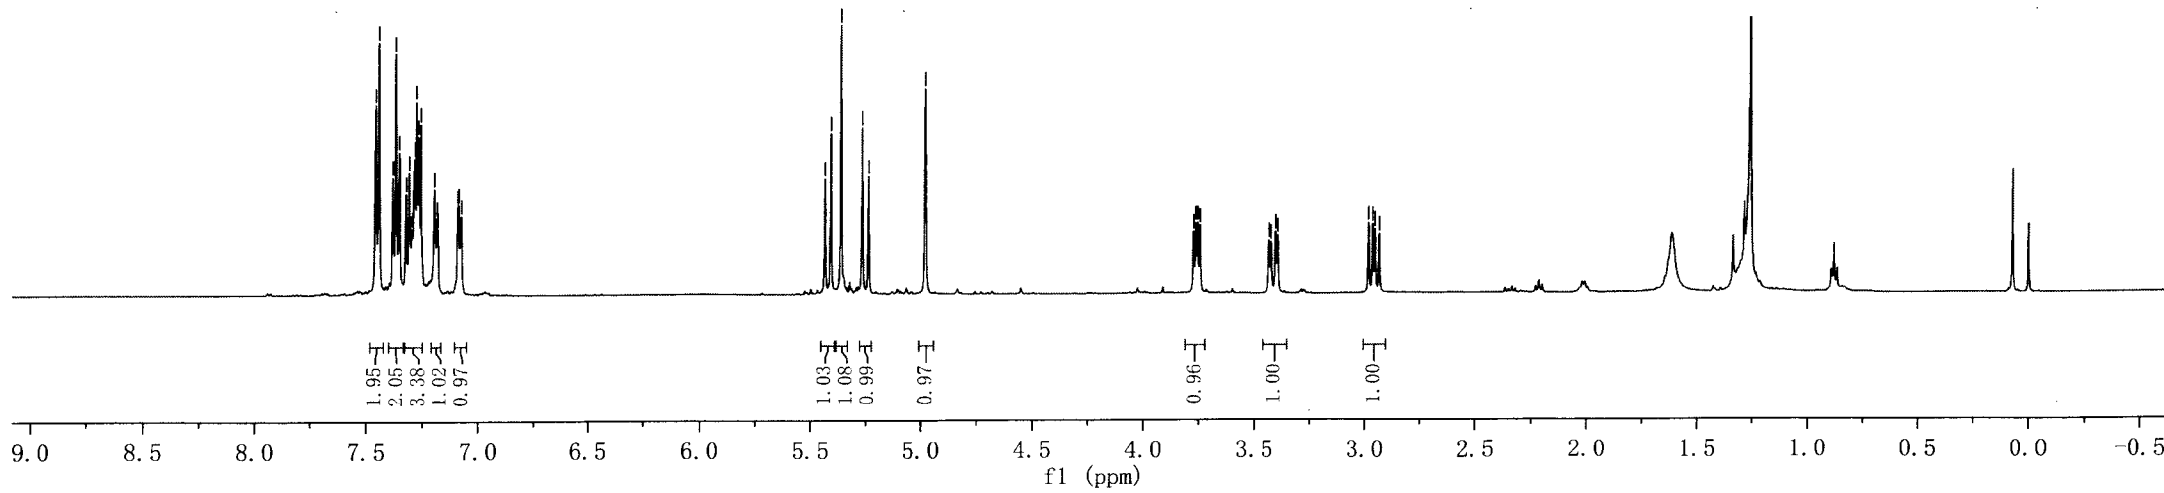

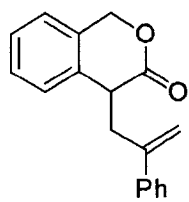

2n

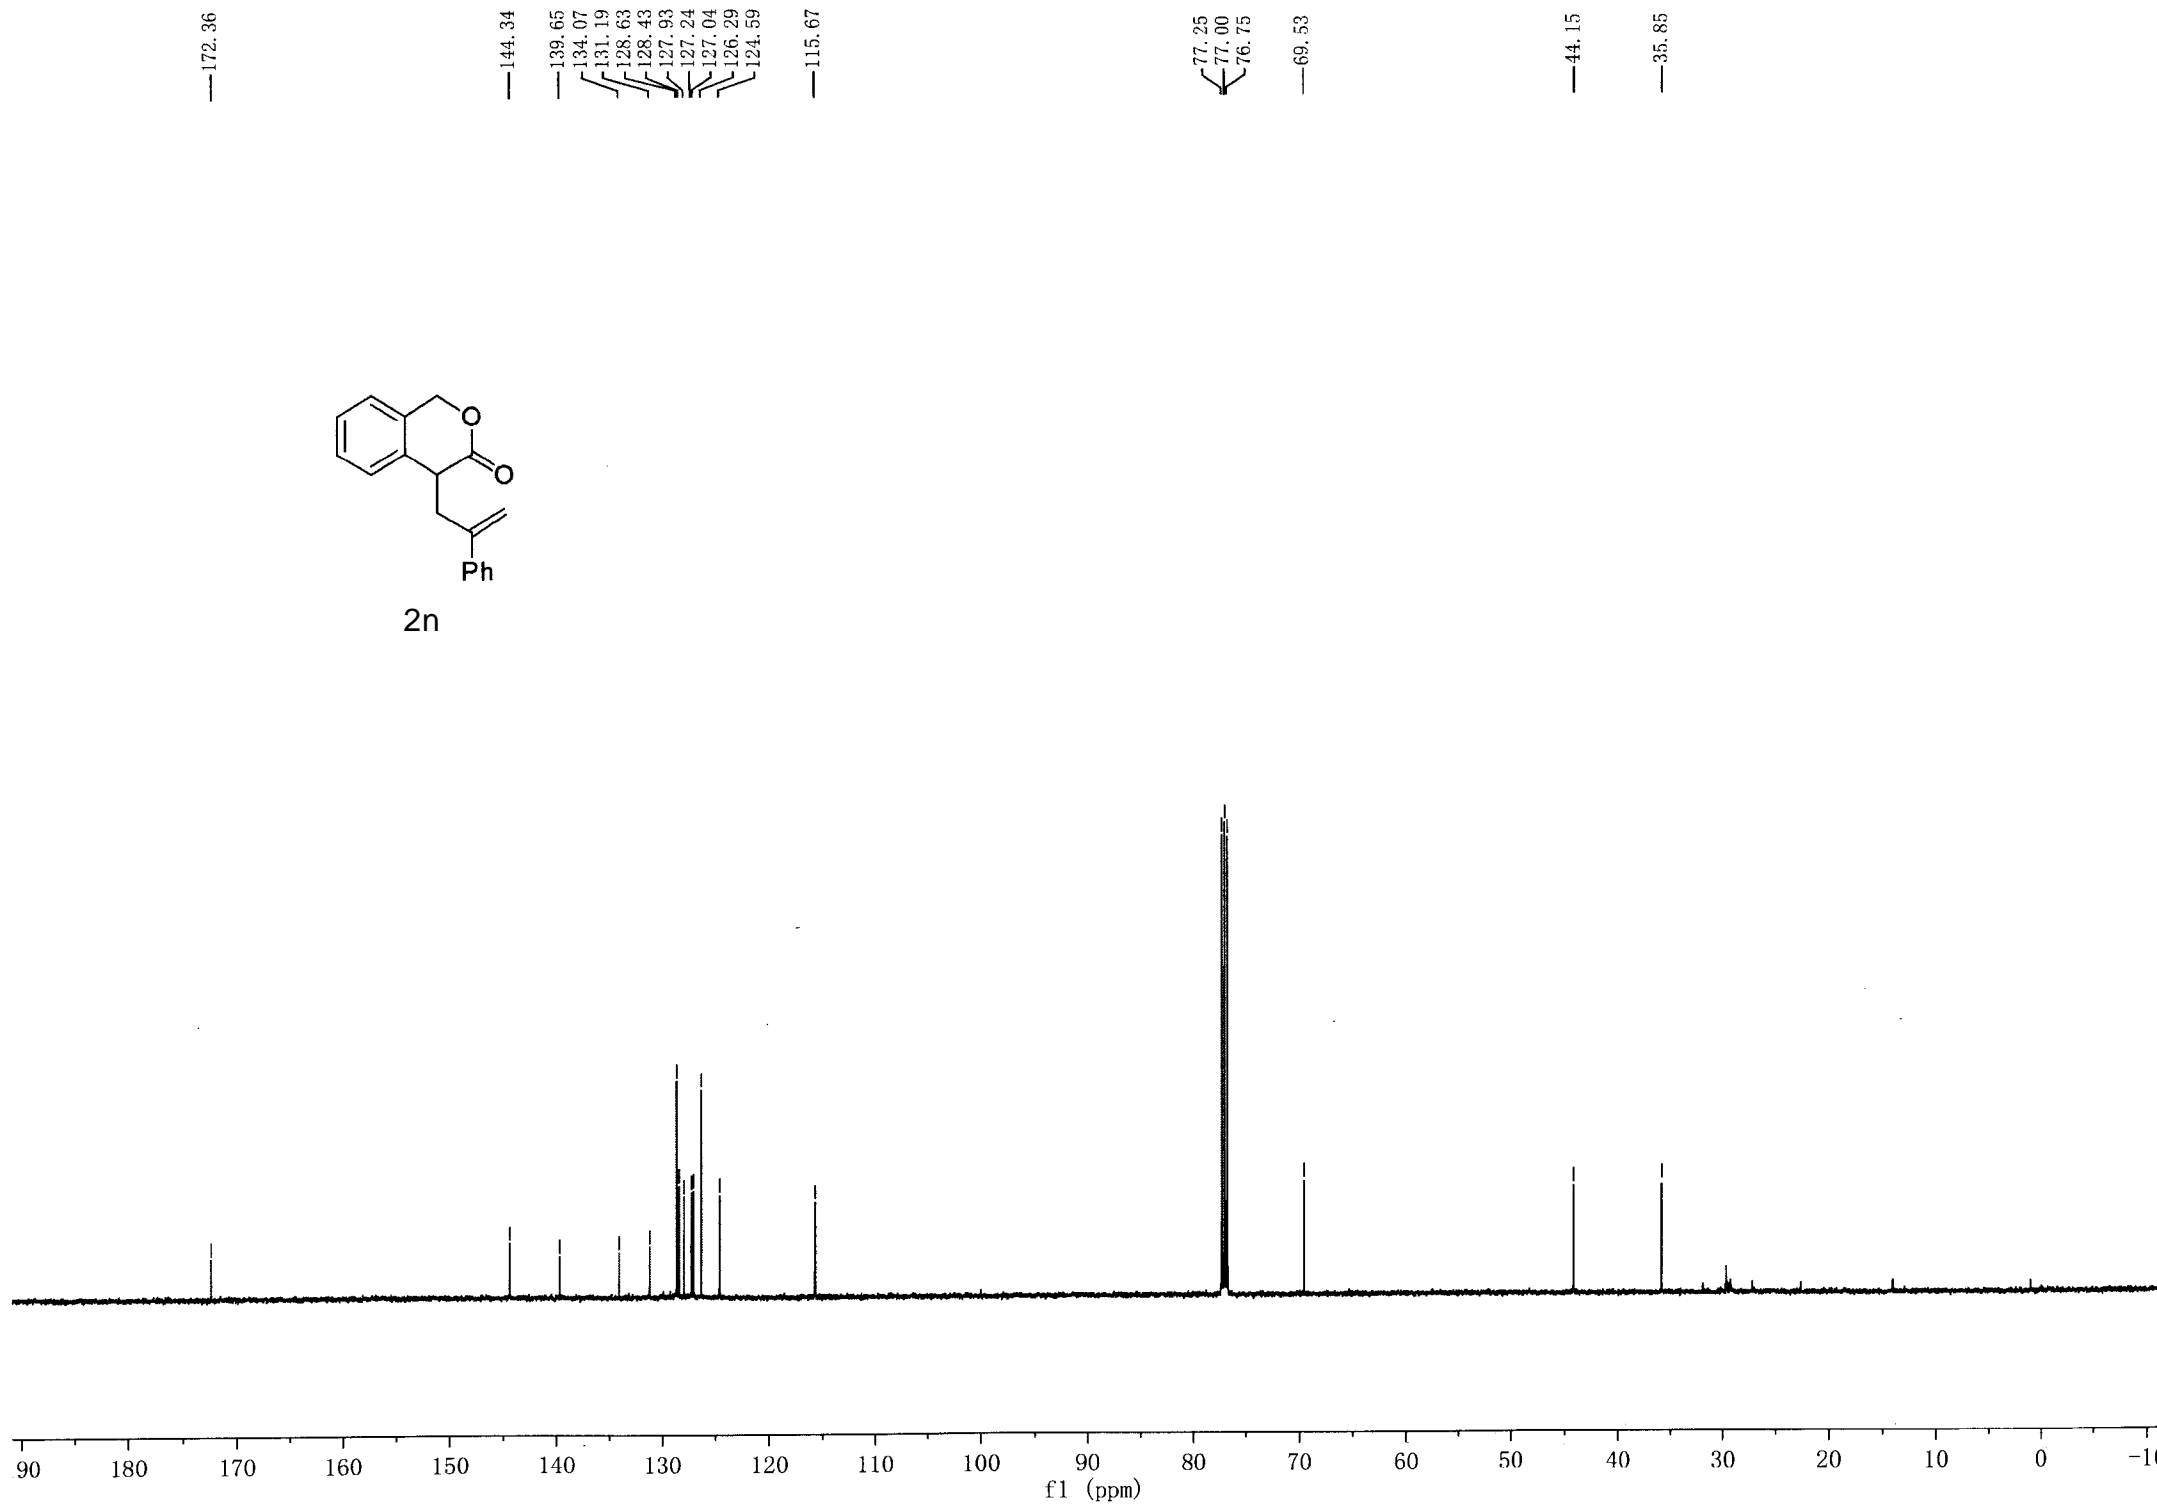

7.375  
7.307  
7.298  
7.283  
7.257  
7.212

6.475  
6.436  
6.265  
6.248  
6.230  
6.208  
6.190

5.424  
5.389  
5.305  
5.270

3.799  
3.782  
3.766

3.012  
2.998  
2.979  
2.962  
2.947  
2.918  
2.901  
2.883  
2.865  
2.847

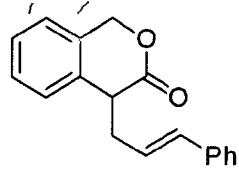

20

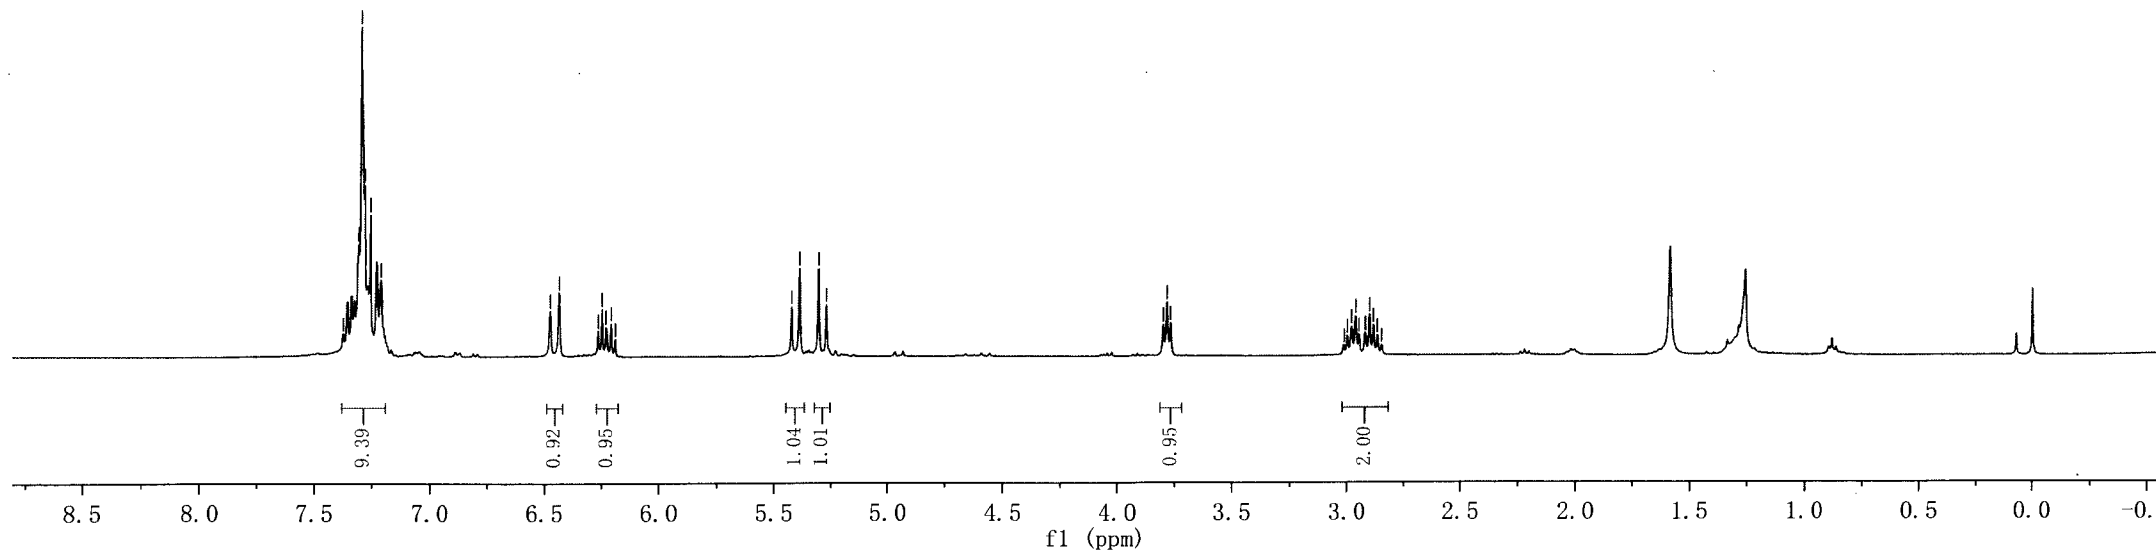

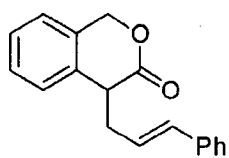

2o

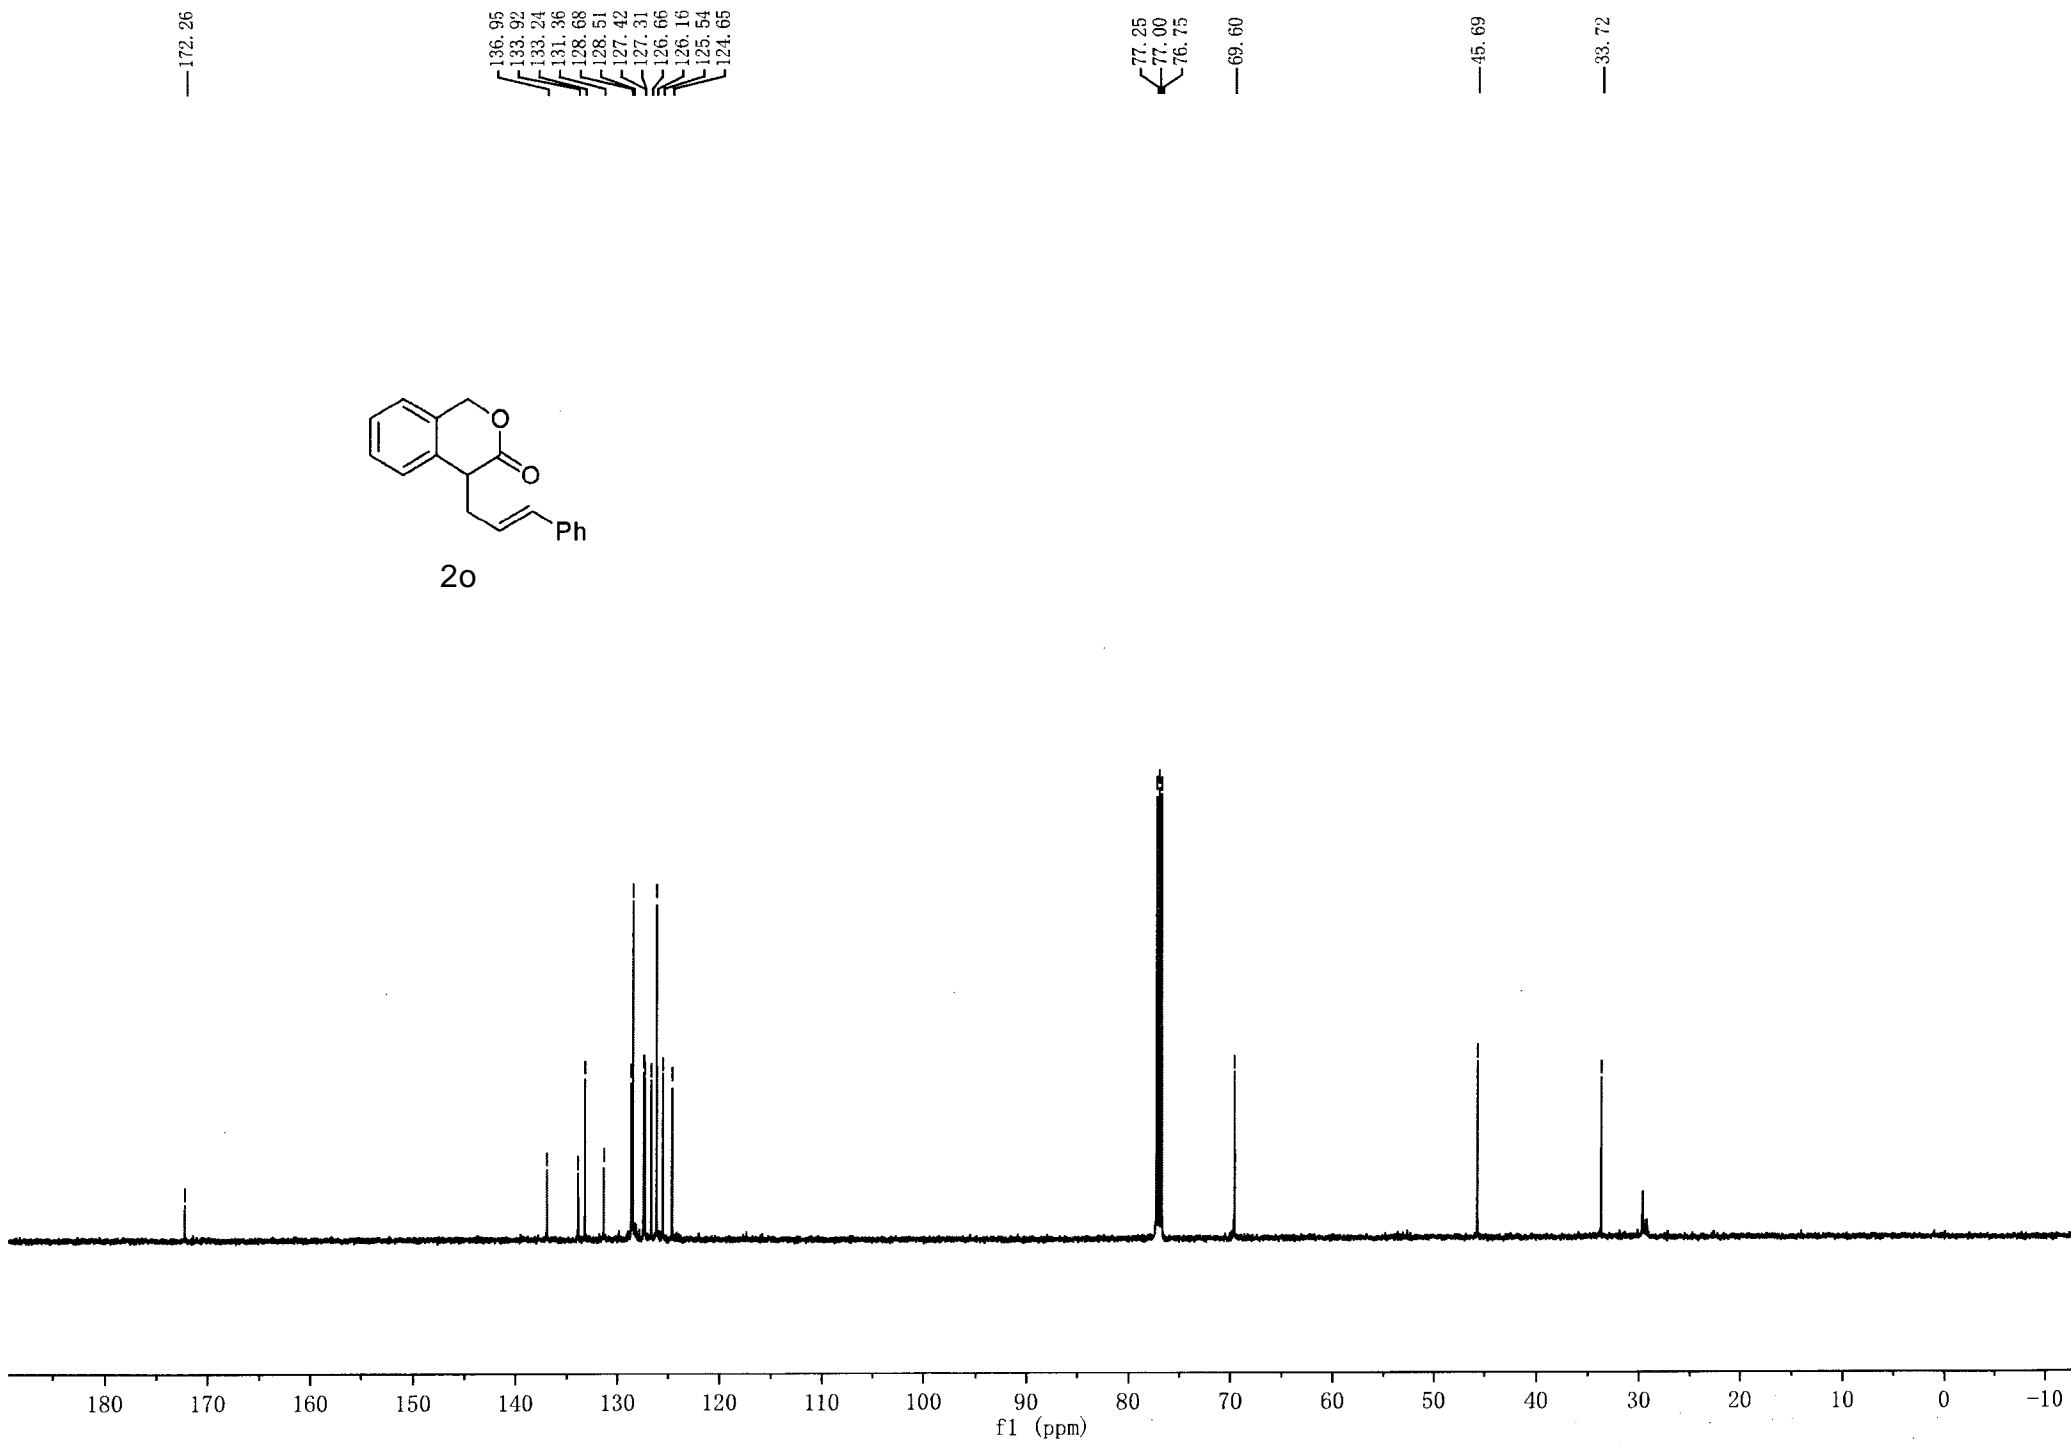

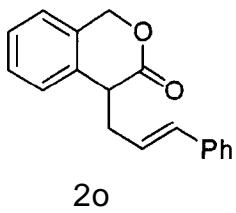

133.24  
128.67  
128.51  
127.43  
127.31  
126.66  
126.15  
125.53  
124.65

69.60

45.69

33.72

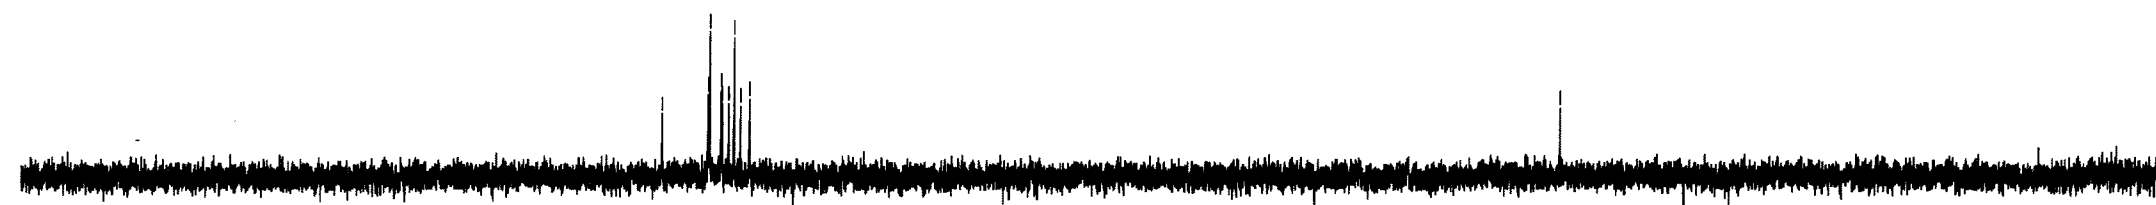

190 180 170 160 150 140 130 120 110 100 90 80 70 60 50 40 30 20 10 0 -10  
f1 (ppm)

7.260  
7.226  
7.219  
7.205  
7.140  
7.138  
7.136  
7.133  
7.131  
7.124  
7.117

5.967  
5.958  
5.950  
5.941  
5.925  
5.915  
5.908  
5.899  
5.882

5.220  
5.216  
5.177  
5.173  
5.143  
5.139  
5.117  
5.113

4.821  
4.807  
4.801  
4.785  
4.759  
4.546  
4.533  
4.526  
4.513  
4.500  
4.420  
4.405  
4.397  
4.383

3.415  
3.402  
3.384  
3.370  
3.361  
3.347  
3.323  
3.303

3.001  
2.985  
2.965  
2.946  
2.939  
2.920  
2.787  
2.773  
2.761  
2.755  
2.737  
2.722

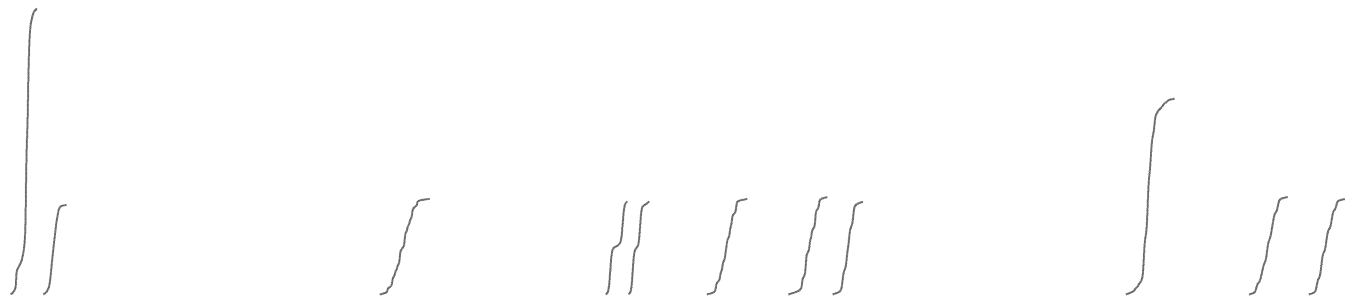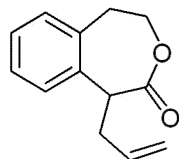

2p

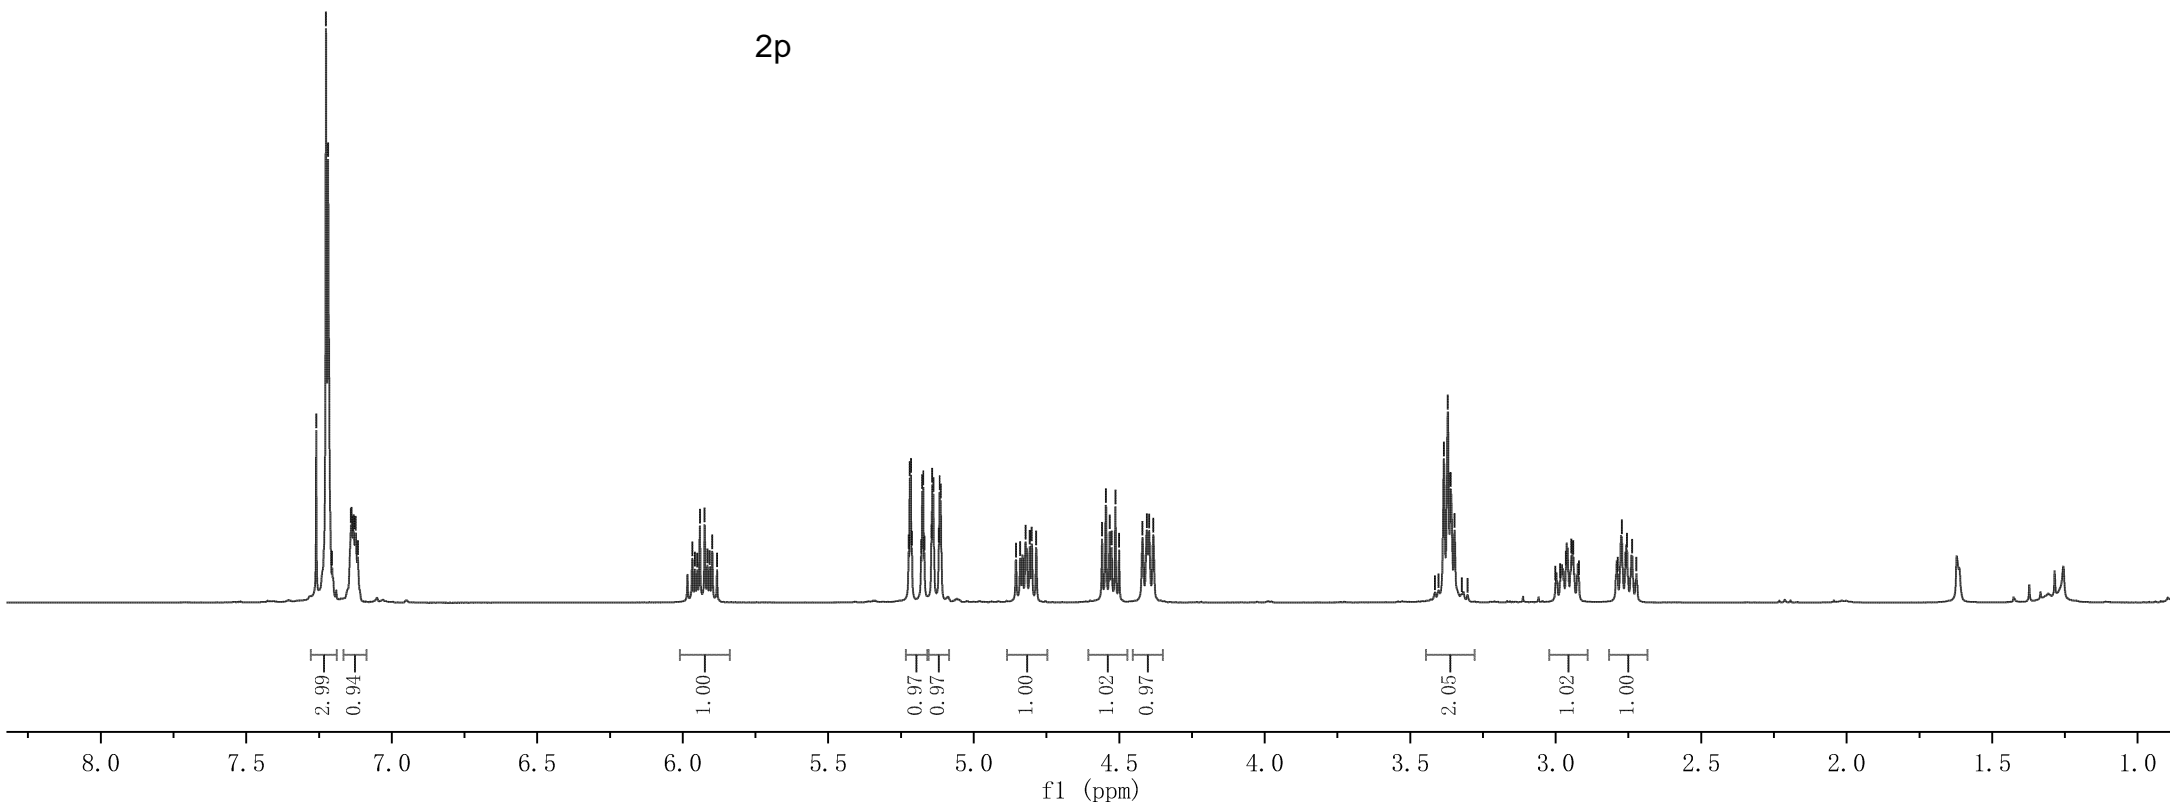



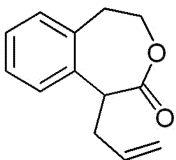

2p

—173.15

135.26  
134.96  
132.89  
130.50  
127.53  
127.01  
126.90  
—117.60

77.25  
77.00  
76.75

—65.11

—46.02

34.05  
33.94

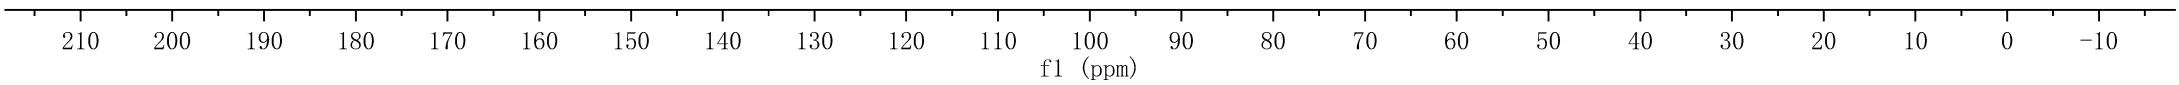

7.260

6.729

6.546

5.543

5.525

5.518

5.507

5.500

5.482

5.475

5.464

5.457

5.279

5.061

5.057

5.019

5.014

5.000

4.998

4.996

4.975

4.973

4.970

3.873

3.855

2.884

2.866

2.849

2.831

2.598

2.580

2.563

2.545

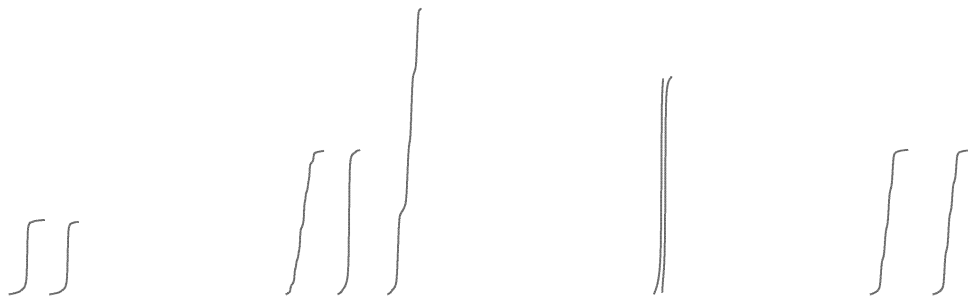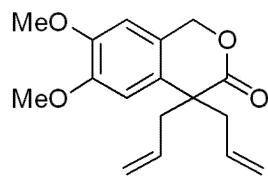

2ia

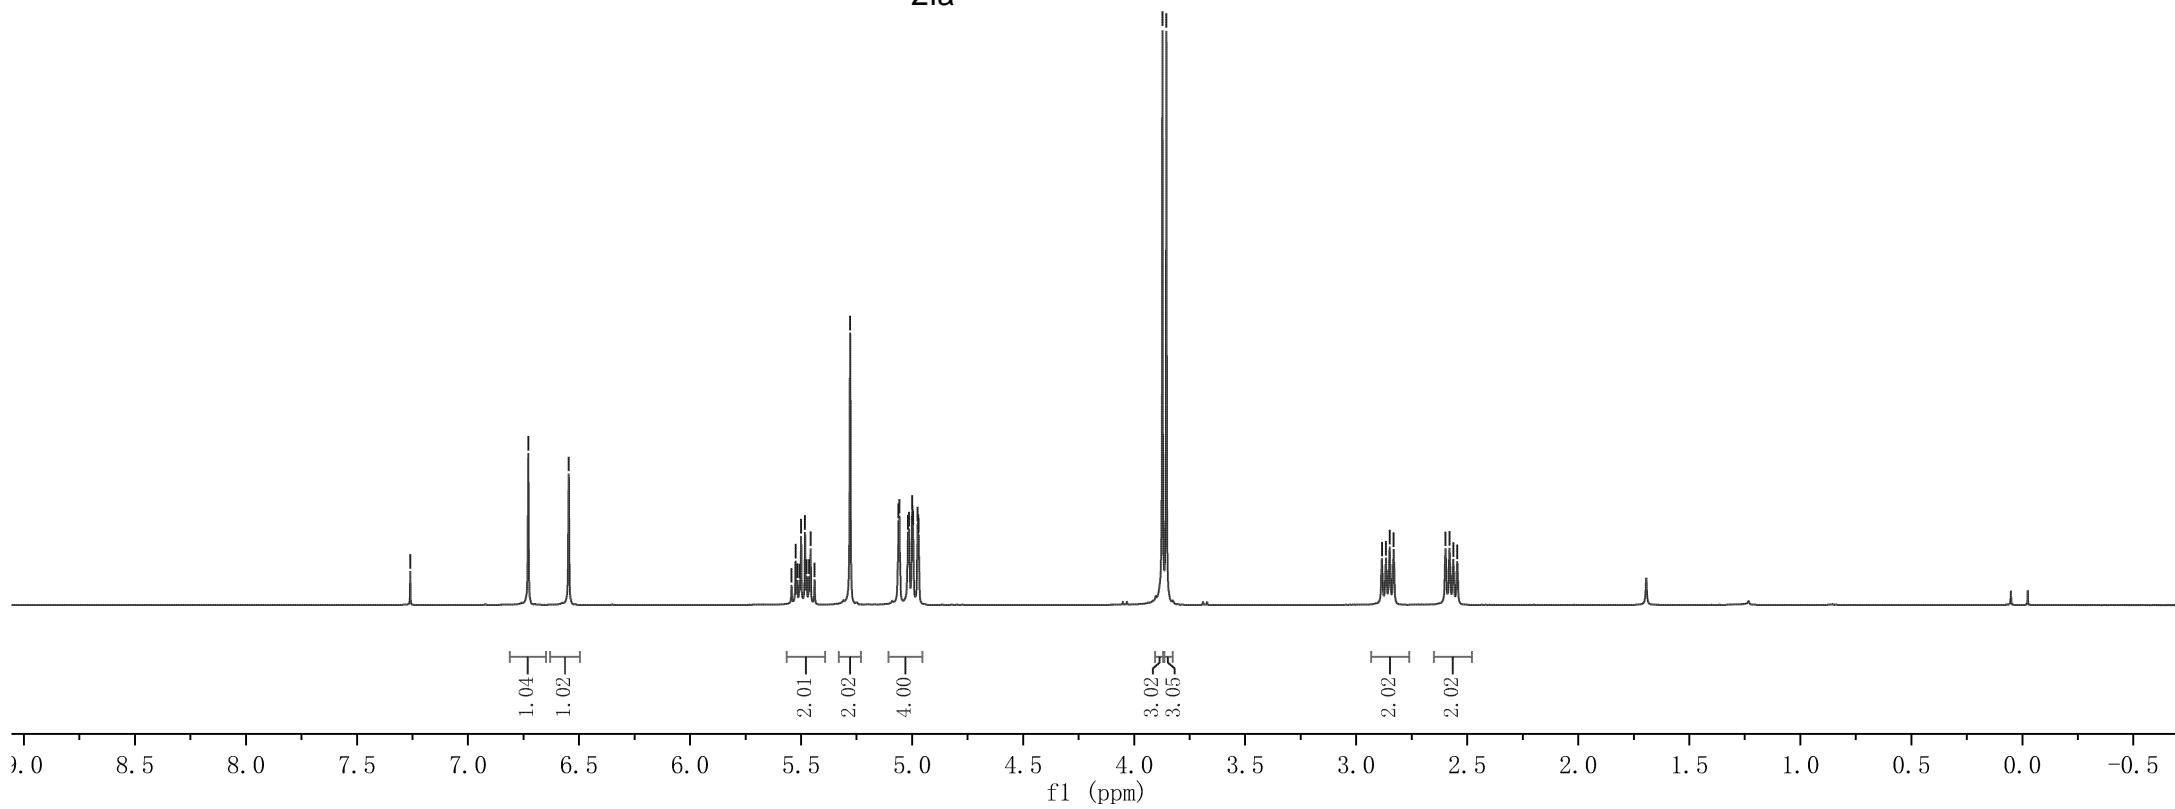

—173.13

149.02  
148.14

—132.64

126.57  
123.00  
119.16

—109.29  
—106.46

77.25  
77.00  
76.75

—69.08

56.08  
55.86

—49.77

—43.41

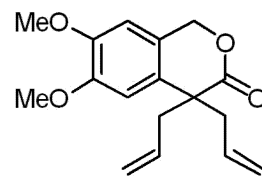

2ia

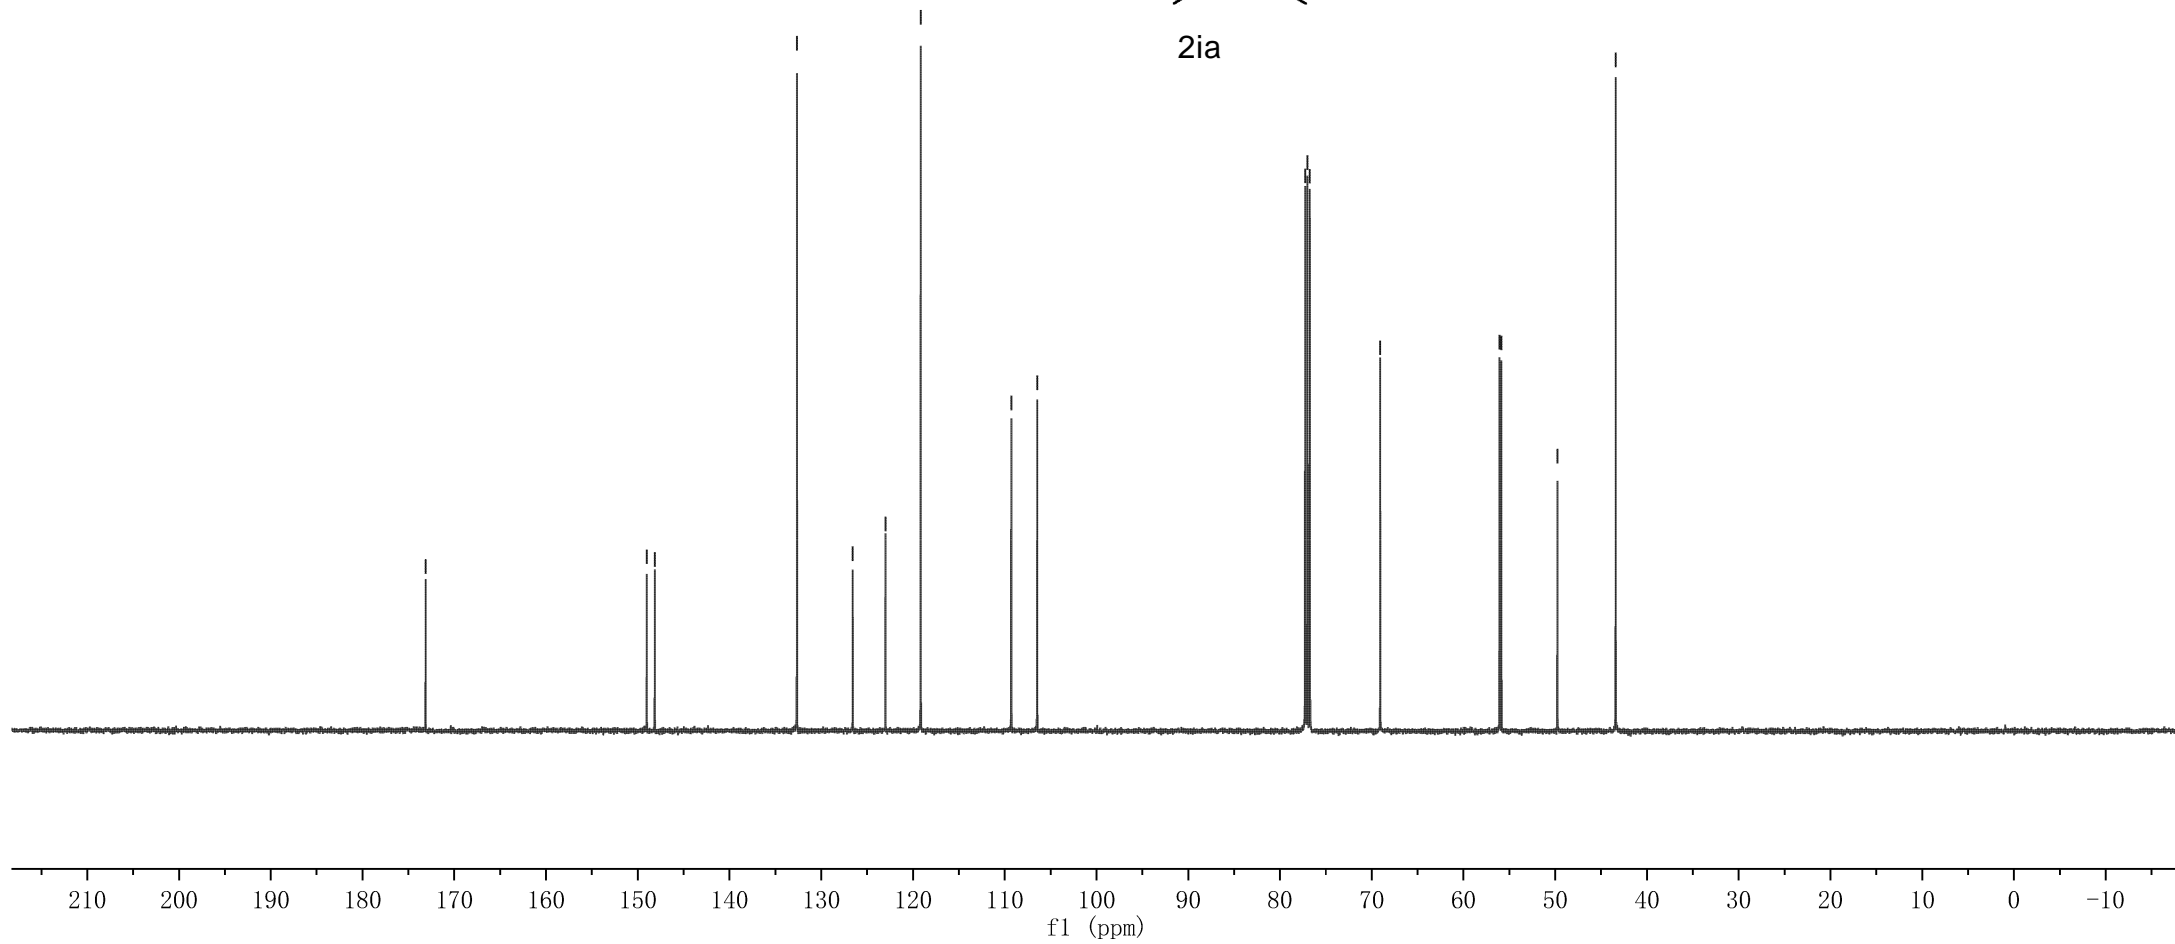

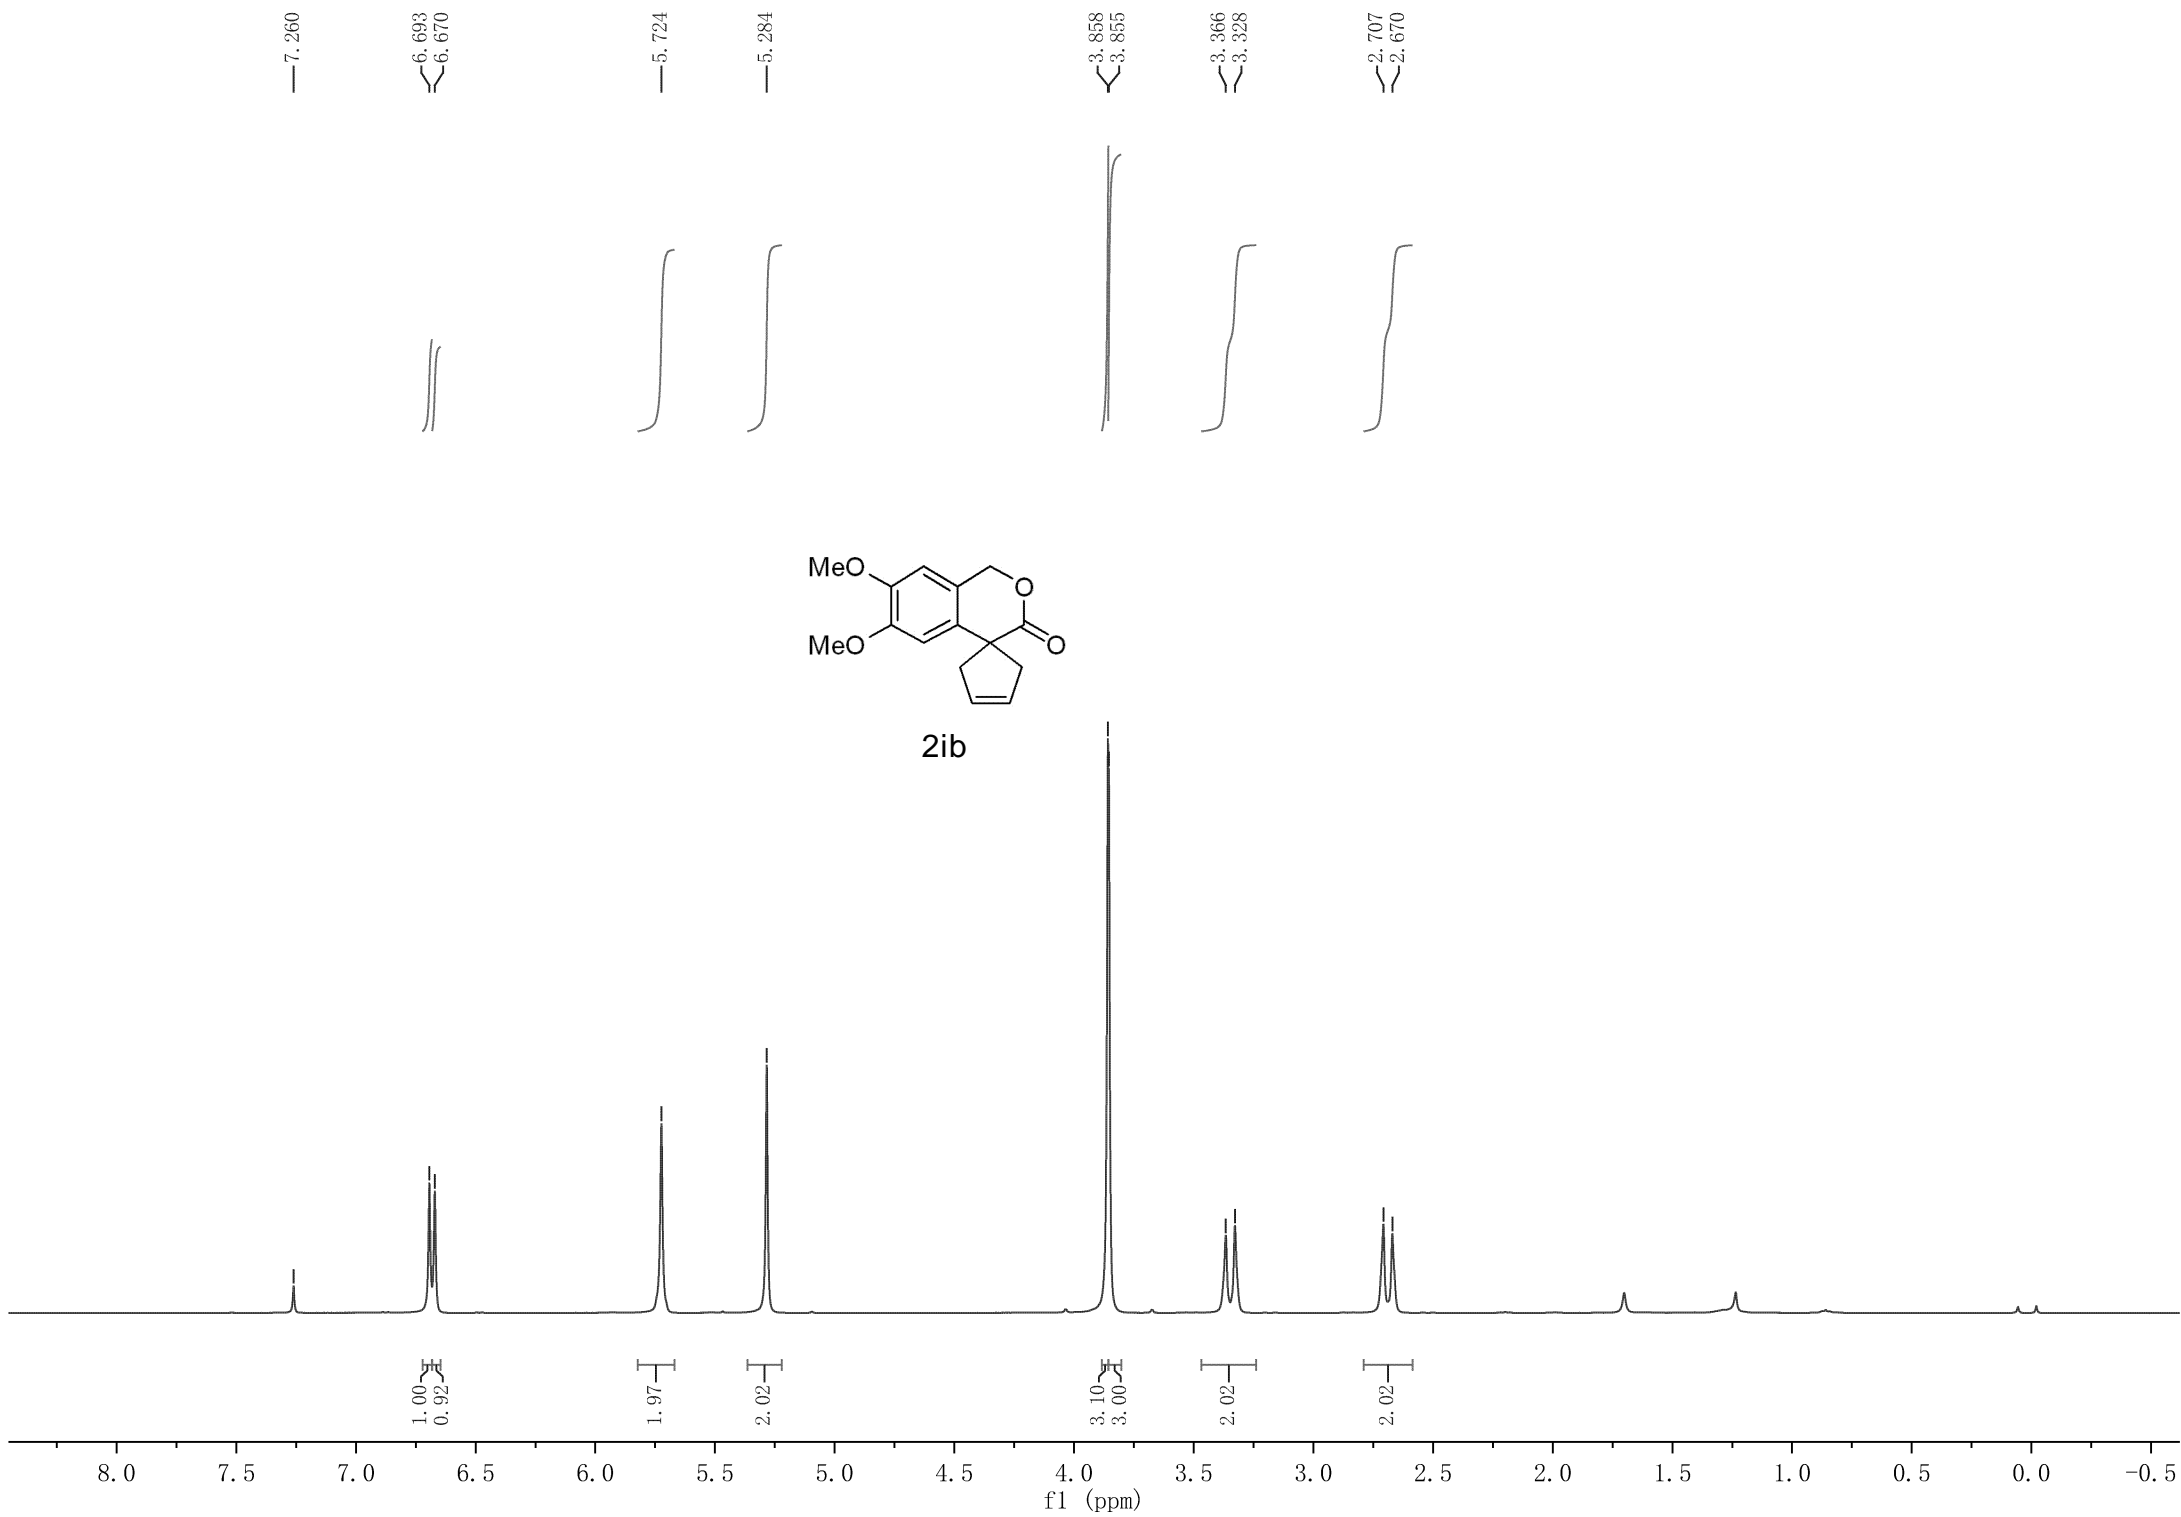

—175.26

149.17  
148.00

—132.06

—127.59

—122.50

108.13  
107.75

77.21  
77.00  
76.79

—68.88

—56.03

—50.72

—43.71

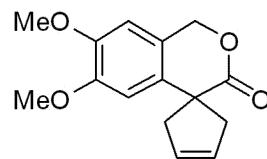

2ib

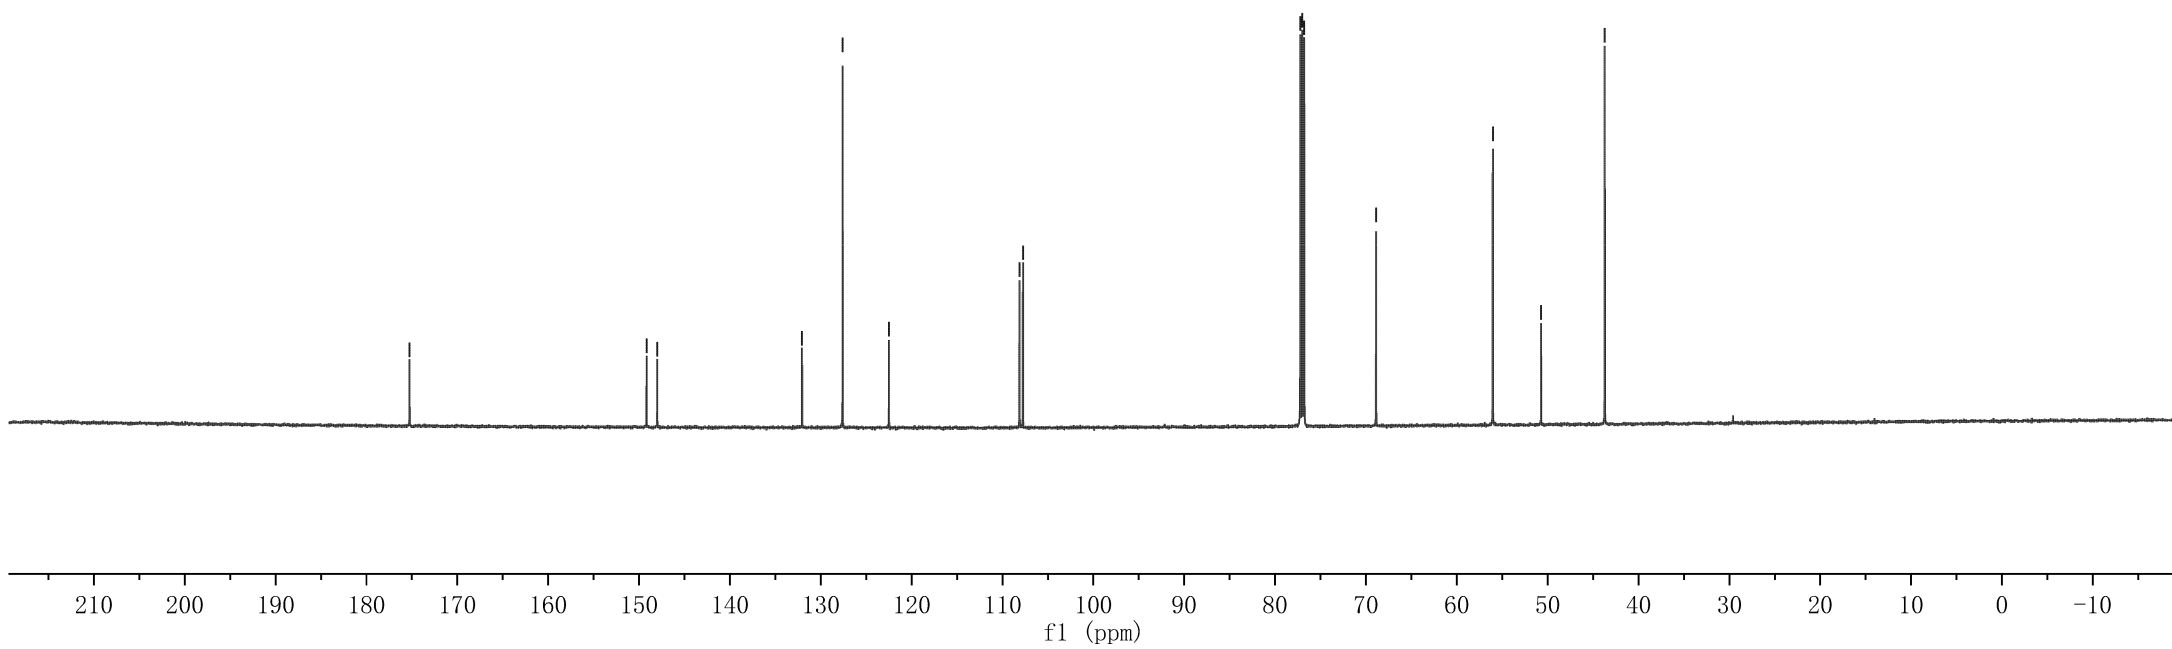

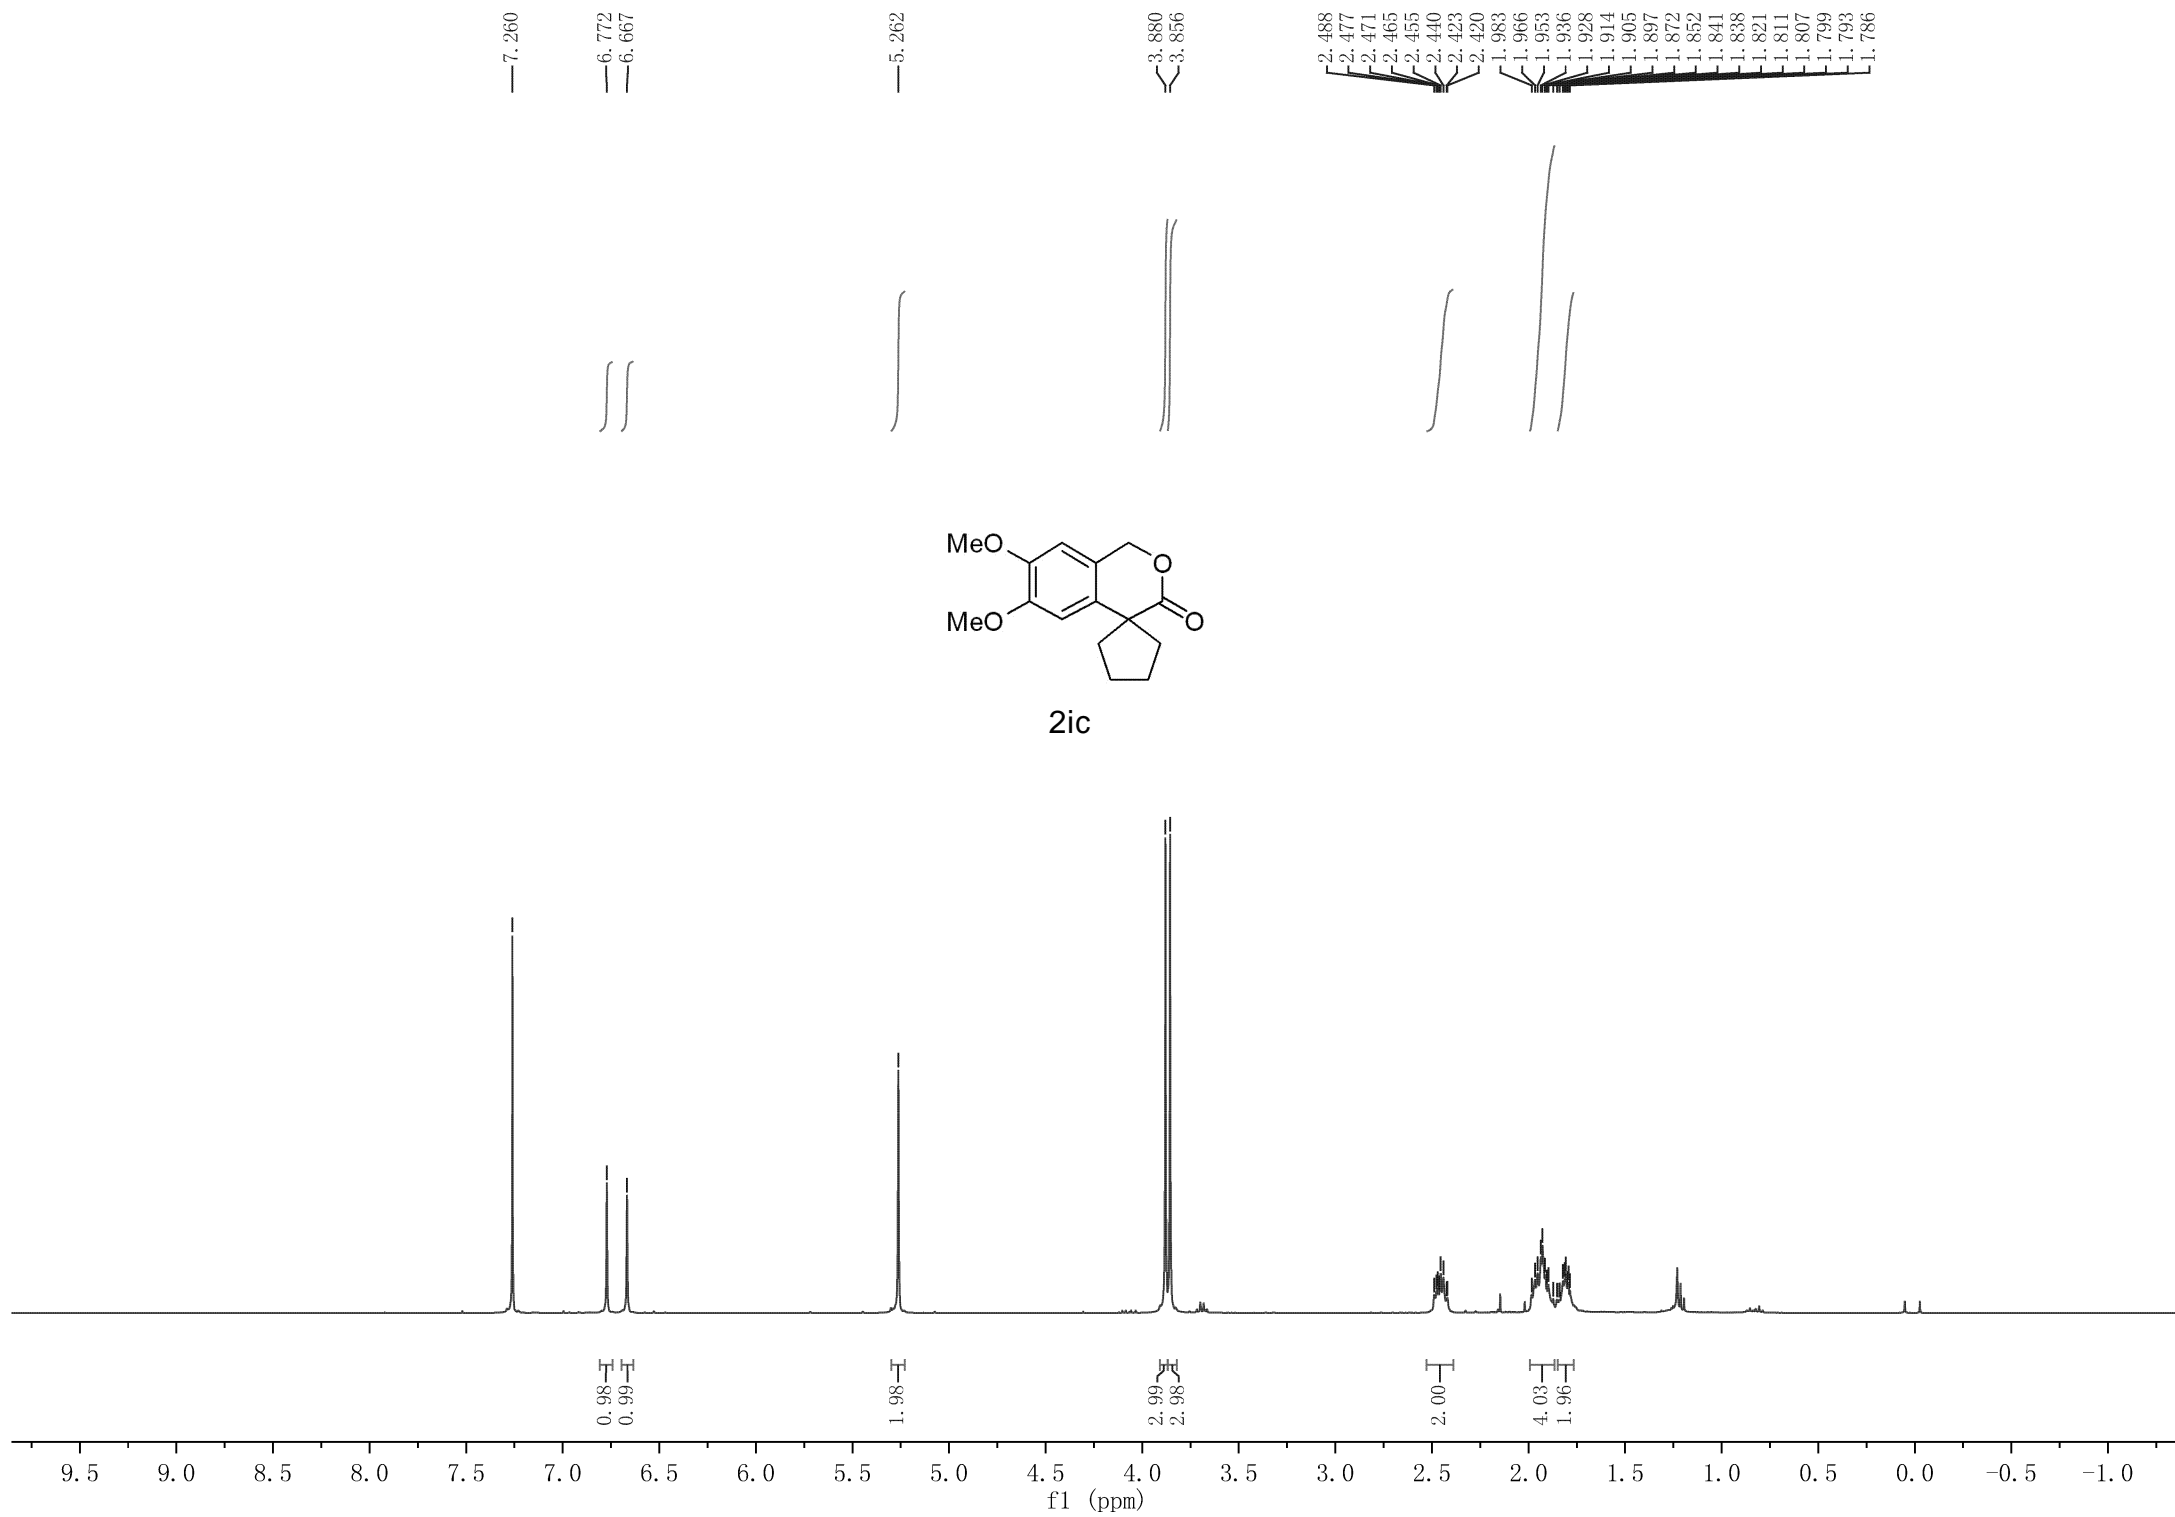

— 175.56

149.05  
147.83

— 131.71

— 123.53

108.12  
107.93

77.25  
77.00  
76.75

— 68.92

56.10  
56.03  
52.36

— 35.67

— 25.50

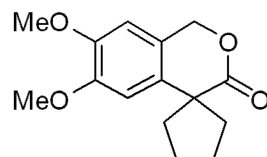

2ic

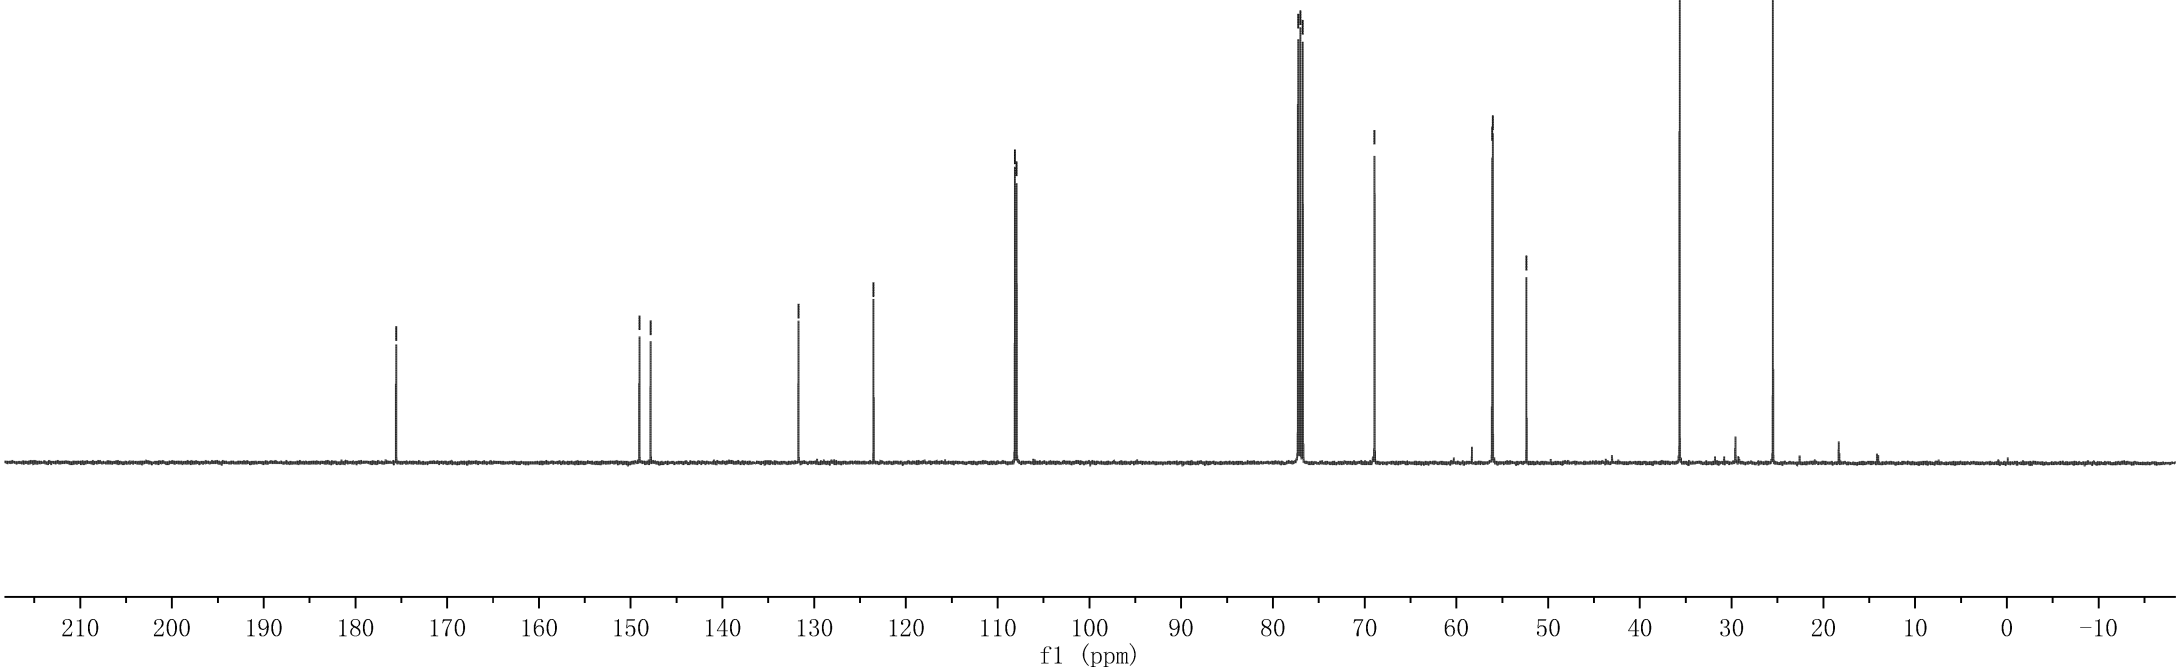

7.396  
7.393  
7.377  
7.374  
7.359  
7.356  
7.344  
7.341  
7.325  
7.322  
7.307  
7.304  
7.284  
7.261  
7.251  
7.233

5.881

5.453  
5.418  
5.322  
5.286

3.734  
3.717  
3.700

2.883  
2.868  
2.851  
2.847  
2.831  
2.815  
2.758  
2.740  
2.721  
2.703  
2.685

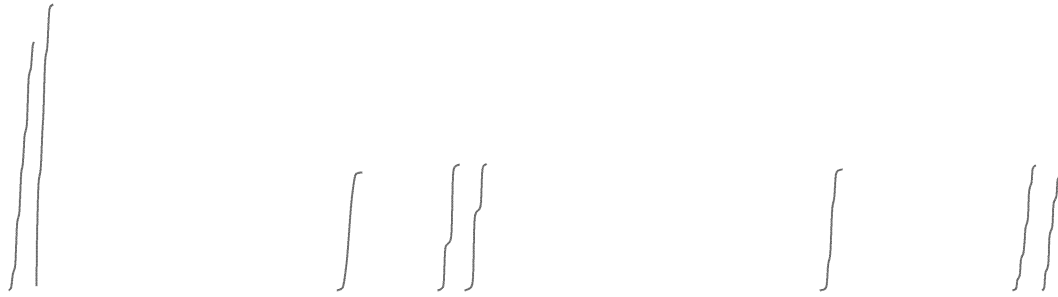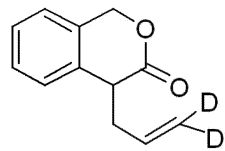

2a'

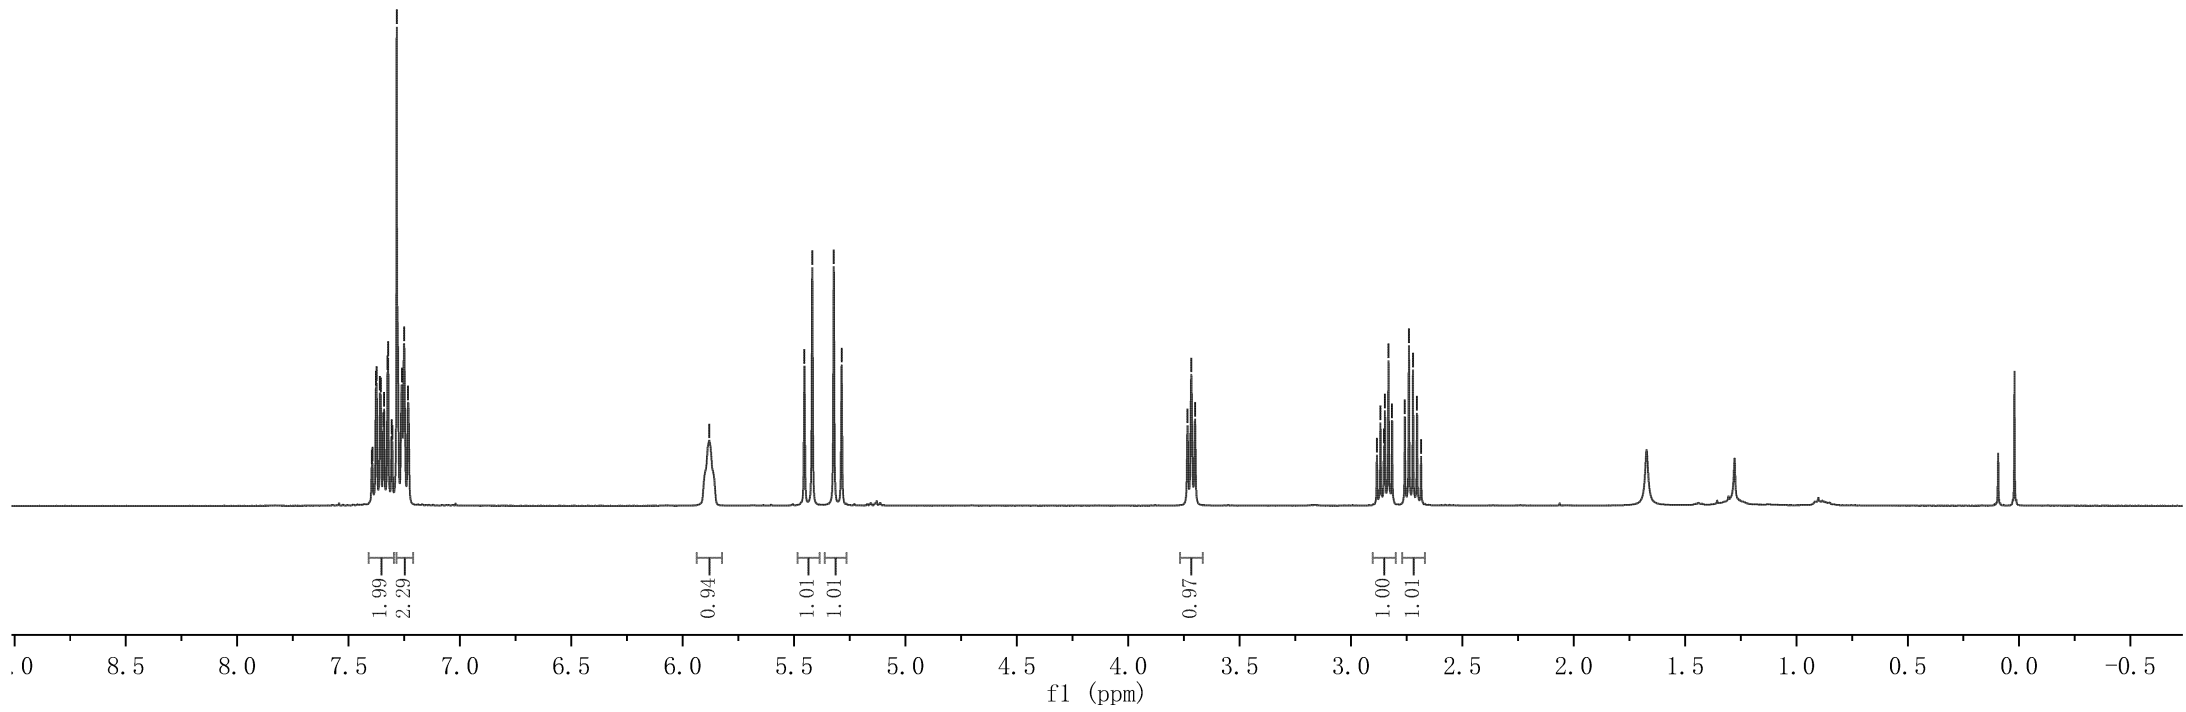



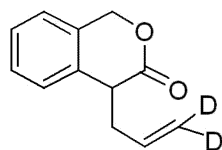

2a'

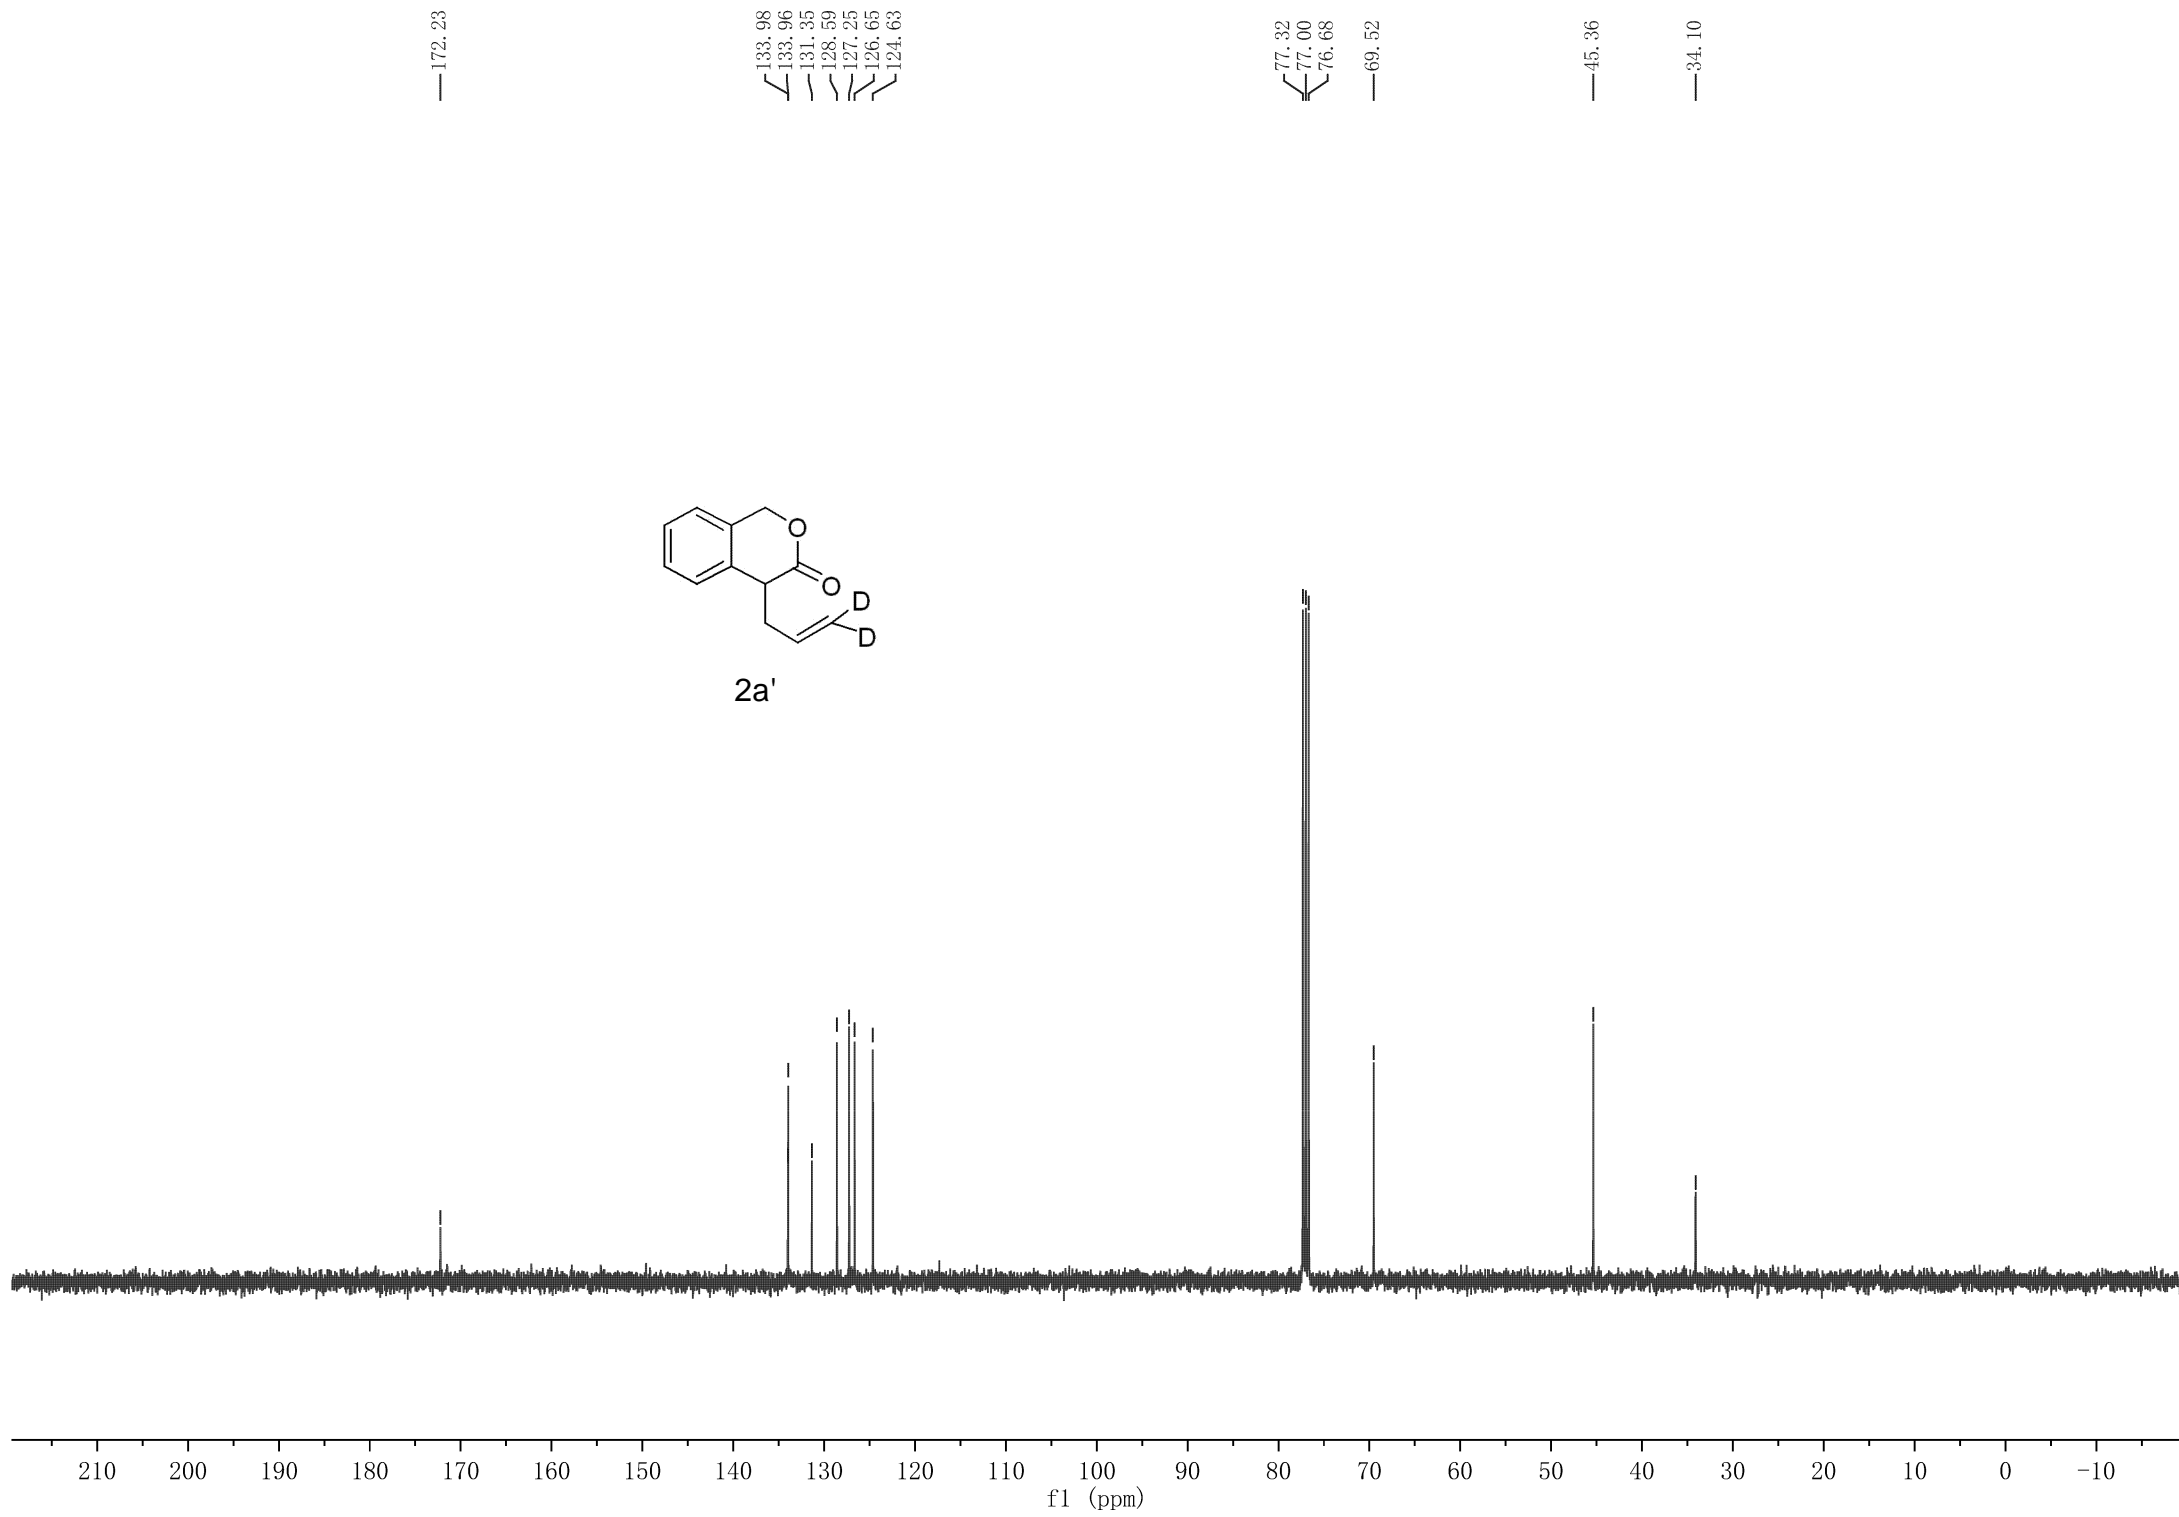

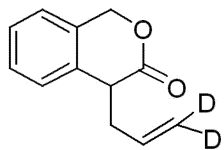

2a'

133.96  
128.59  
127.25  
126.65  
124.63

69.52

45.36

34.10

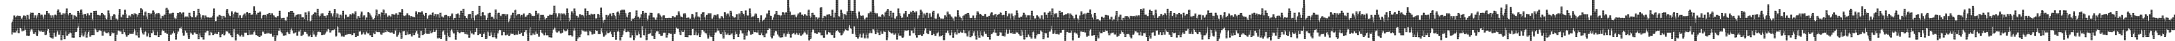

210 200 190 180 170 160 150 140 130 120 110 100 90 80 70 60 50 40 30 20 10 0 -10

f1 (ppm)
